# Supplementary material
Source: PubMed Central journal article supplement (PMC5010016)
Supplement: ol6b02082_si_001.pdf [file ol6b02082_si_001.pdf]

# Development of a Method for the *N*-Arylation of Amino Acid Esters with Aryl Triflates

Sandra M. King and Stephen L. Buchwald\*

*Department of Chemistry, Massachusetts Institute of Technology,  
Cambridge, Massachusetts 02139, USA*

## Supporting Information

### Table of Contents

#### **I. General Information**

|                         |    |
|-------------------------|----|
| A) Procedures .....     | S2 |
| B) Materials.....       | S2 |
| C) Instrumentation..... | S2 |

#### **II. Experimental Procedures and Characterization Data**

|                                                            |     |
|------------------------------------------------------------|-----|
| A) <i>N</i> -Arylation of Amino Acid Esters.....           | S4  |
| B) Preparation of Starting Materials.....                  | S17 |
| C) Reaction Optimization.....                              | S19 |
| D) Design of Experiment (DOE) Analysis.....                | S22 |
| E) Experiments to Determine Mechanism of Racemization..... | S28 |

#### **III. Catalog of Spectra**

|                                 |      |
|---------------------------------|------|
| A) Catalog of NMR Spectra.....  | S31  |
| B) Catalog of HPLC Spectra..... | S112 |

|                              |             |
|------------------------------|-------------|
| <b>IV. Bibliography.....</b> | <b>S159</b> |
|------------------------------|-------------|

## I. General Information

**A) Procedures:** All reactions were performed in oven-dried Fisher Scientific 20 Å~ 125 mm screw-cap tubes (Cat. No. 14-959-37A) using Thermo Scientific PTFE/silicon septa (Cat. No. B7995-18), unless otherwise noted. Intermediates were purified using a Biotage® Isolera system, employing polypropylene cartridges preloaded with silica gel (Silicycle SiliaFlash® F60 silica gel) or with new Biotage® SNAP cartridges. Samples were eluted using a flow rate of 18–50 mL/min, with detection by UV (254 nm). Analytical thin-layered chromatography (TLC) was performed using glass plates pre-coated with silica gel (0.25 mm, 60 Å pore size) impregnated with a fluorescent indicator (254 nm). TLC plates were visualized by exposure to ultraviolet light (UV) and/or submersion in aqueous ceric ammonium molybdate solution (CAM), or aqueous potassium permanganate solution (KMnO<sub>4</sub>).

**B) Materials:** Commercial solvents and reagents were purchased from Aldrich Chemical Company, Strem Chemicals, Acros Organics, Alfa Aesar, TCI America, Combi Blocks, Oakwood Chemical, Matrix Scientific, and Chem-Impex and used as received with the following exceptions. *t*-BuBrettPhos (**L1**) was a gift from Aldrich. Anhydrous 1,4-dioxane and 2-methyltetrahydrofuran were purchased from Aldrich Chemical Co. in Sure-Seal™ bottles and used as received. THF and CH<sub>2</sub>Cl<sub>2</sub> were purchased from J.T. Baker in CYCLE-TAINER® solvent-delivery kegs and vigorously purged with argon for 2 h, followed by passing it under argon pressure through two packed columns of neutral alumina. Cesium carbonate, sodium *tert*-butoxide, sodium phenoxide, and potassium phosphate were stored in a nitrogen-filled glovebox. Small quantities of cesium carbonate were stored on the bench in a desiccator for up to one week. Unless otherwise noted, amino acid ester free bases were prepared from the corresponding hydrochloride salt by washing with 10% aqueous sodium carbonate. Precatalyst **P3** was prepared by a modified literature procedure (vide infra).<sup>1</sup> Precatalyst **P1**,<sup>2</sup> precatalyst **P2**,<sup>1</sup> *N*-methyl-2-aminobiphenylpalladium methanesulfonate dimer (**S1**),<sup>1</sup> L-Trp-(Boc)-OMe (**5m**),<sup>3</sup> L-Gln-(Trt)-OMe•HCl (**5l**),<sup>4</sup> L-β-Phe-OMe•HCl (**5n**),<sup>5</sup> 4-*n*-butylphenyl trifluoromethanesulfonate (**7a**),<sup>6</sup> *m*-tolyl trifluoromethanesulfonate (**7b**),<sup>7</sup> 2-methoxy-4-propylphenyl trifluoromethanesulfonate (**7c**),<sup>8</sup> 4-acetamidophenyl trifluoromethanesulfonate (**7e**),<sup>9</sup> methyl 3-trifluoromethanesulfonyloxybenzoate (**7g**),<sup>10</sup> 4-chlorophenyl trifluoromethanesulfonate (**7h**),<sup>11</sup> 3-acetylphenyl trifluoromethanesulfonate (**7j**),<sup>12</sup> 4-(trifluoromethyl)phenyl trifluoromethanesulfonate (**7k**),<sup>9</sup> 3-quinoliny trifluoromethanesulfonate (**7l**),<sup>13</sup> estrone trifluoromethanesulfonate (**7m**),<sup>14</sup> and 1-bromo-4-(methoxymethyl)benzene<sup>15</sup> were prepared according to published procedures.

**C) Instrumentation:** Proton nuclear magnetic resonance spectra (<sup>1</sup>H NMR) were recorded at 400 or 500 MHz at 24 °C, unless otherwise noted. Chemical shifts are expressed in parts per million (ppm, δ scale) downfield from tetramethylsilane and are referenced to residual protium in the NMR solvent (CHCl<sub>3</sub>, δ 7.26; CHD<sub>2</sub>OD, δ 3.31). Data are represented as follows: chemical shift, multiplicity (s = singlet, d = doublet, t = triplet, q = quartet, m = multiplet and/or multiple resonances, br = broad, app = apparent), coupling constant in Hertz, and integration. Proton-decoupled carbon nuclear magnetic resonance spectra (<sup>13</sup>C NMR) were recorded at 100 or 125 MHz at 24 °C, unless otherwise noted. Chemical shifts are expressed in parts per million (ppm, δ scale) downfield from tetramethylsilane and are referenced to the carbon resonances of the solvent (CDCl<sub>3</sub>, δ 77.2; CD<sub>3</sub>OD, δ 49.0). Proton-decoupled fluorine nuclear magnetic resonance spectra (<sup>19</sup>F NMR) were recorded at 375 MHz at 24 °C, unless otherwise noted. Chemical shifts are expressed in parts per million (ppm, δ scale) downfield from fluorotrichloromethane (0.00 ppm). Proton-decoupled phosphorous nuclear magnetic resonance spectra (<sup>31</sup>P NMR) were recorded at 162 MHz at 24 °C, unless otherwise noted. Chemical shifts are expressed in parts per million (ppm, δ scale) downfield from 85% aq. phosphoric acid (0.00 ppm). Attenuated total reflectance Fourier transform infrared spectra (ATR-FTIR) were obtained using a Thermo

Scientific iD5 ATR Nicolet iS5 FT-IR spectrometer referenced to a polystyrene standard and data are reported as frequency of absorption ( $\text{cm}^{-1}$ ). Melting points were obtained on a Mel-Temp capillary melting point apparatus. Elemental analyses were carried out by Atlantic Microlab, Inc., Norcross, GA. High Resolution Mass Spectra were obtained on a Bruker Daltonics APEXIV 4.7 Tesla Fourier transform ion cyclotron resonance mass spectrometer (FT-ICR-MS). High-pressure liquid chromatography (HPLC) was performed on Agilent 1200 Series chromatographs using chiral columns (25 cm) as noted for each compound. (Note: In some instances DL material was prepared by mixing a 1:1 ratio of the L- and D-amino acid ester. As this was often done on a small scale, the ratios of the enantiomeric products shown below may differ from 1:1). Optical rotations were measured on a Jasco P-1010 polarimeter equipped with a sodium (589 nm, D) lamp. Optical rotation data are represented as follows: specific rotation ( $[\alpha]_D^{25}$ ), concentration (g/100 mL), and solvent.

## II. Experimental Procedures and Characterization Data<sup>16</sup>

### A) *N*-Arylation of Amino Acid Esters

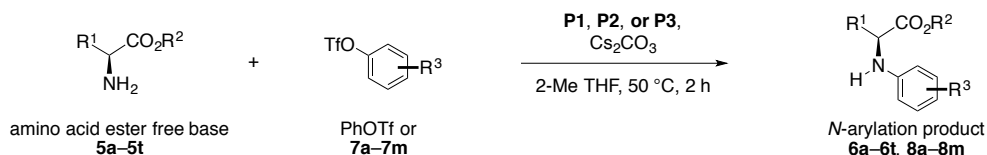

**General Procedure:** A 25 mL screw-cap tube equipped with a stir bar and Teflon septum was charged sequentially with amino acid ester, if solid, (1.00 mmol, 1.00 equiv), triflate, if solid, (1.00 mmol, 1.00 equiv), **P1** (43.0 mg, 50.0  $\mu\text{mol}$ , 5.0 mol%) or **P3** (43.0 mg, 50.0  $\mu\text{mol}$ , 5.0 mol%), and cesium carbonate (977 mg, 3.00 mmol, 3.00 equiv). The reaction test tube was capped and then evacuated and backfilled with argon by piercing with a needle attached to a Schlenk line (this process was repeated a total of three times). Amino acid ester and/or triflate, if liquid, and 2-methyltetrahydrofuran (2.00 mL) were added sequentially to the reaction test tube. The reaction test tube was placed in an oil bath that had been preheated to 50  $^\circ\text{C}$ . The reaction mixture was stirred and heated at 50  $^\circ\text{C}$  for 2 h. The reaction mixture was allowed to cool over 20 min to rt. The cooled product mixture was diluted with  $\text{CH}_2\text{Cl}_2$  (5.00 mL). The diluted product mixture was filtered through Celite and concentrated to dryness. The residue obtained was purified by automated flash-column chromatography. The yields reported are the average of two experiments. The enantiomeric excesses (% ee) were determined by HPLC analysis using chiral stationary phases.

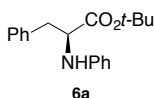

Following the general procedure, a mixture of L-Phe-*O**t*-Bu (**5a**, 221 mg, 1.00 mmol, 1.00 equiv), phenyl trifluoromethanesulfonate (162  $\mu\text{L}$ , 1.00 mmol, 1 equiv), **P1** (43.0 mg, 50.0  $\mu\text{mol}$ , 5.0 mol%), cesium carbonate (977 mg, 3.00 mmol, 3.00 equiv), and 2-methyltetrahydrofuran (2.00 mL) was stirred at 50  $^\circ\text{C}$  for 2 h. The crude product was purified by automated flash-column chromatography (eluting with 2% acetone–hexanes initially, grading to 20% acetone–hexanes, linear gradient) to afford **6a** as a white solid. Yield: 268 mg, 90%. mp = 83–85  $^\circ\text{C}$ .  $^1\text{H}$  NMR (400 MHz,  $\text{CDCl}_3$ )  $\delta$  7.37–7.25 (m, 5H), 7.22 (dd,  $J$  = 8.5, 7.4 Hz, 2H), 6.79 (t,  $J$  = 7.3 Hz, 1H), 6.68 (d,  $J$  = 7.7 Hz, 2H), 4.31 (t,  $J$  = 6.4 Hz, 1H), 3.16 (d,  $J$  = 6.4 Hz, 2H), 1.40 (s, 9H).  $^{13}\text{C}$  NMR (100 MHz,  $\text{CDCl}_3$ )  $\delta$  172.3, 146.7, 136.8, 129.6, 129.4, 128.4, 126.9, 118.3, 113.7, 81.8, 58.3, 38.7, 28.0. IR (neat,  $\text{cm}^{-1}$ ): 3358, 2976, 1704, 1601, 1157, 693. Anal. Calcd. for  $\text{C}_{19}\text{H}_{23}\text{NO}_2$ : C, 76.74; H, 7.80, Found: C, 76.86; H, 7.87.  $[\alpha]_{\text{D}}^{24}$  +18.6 ( $c$  1.0,  $\text{CHCl}_3$ ). HPLC analysis (OJ-H, 2% IPA–hexanes, 0.8 mL/min, 254 nm) indicated 94% ee: tR (minor) = 14.4 min, tR (major) = 19.0 min.

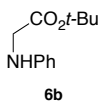

Following the general procedure, a mixture of Gly-*O**t*-Bu (**5b**, 131 mg, 1.00 mmol, 1.00 equiv), phenyl trifluoromethanesulfonate (162  $\mu\text{L}$ , 1.00 mmol, 1 equiv), **P1** (43.0 mg, 50.0  $\mu\text{mol}$ , 5.0 mol%), cesium carbonate (977 mg, 3.00 mmol, 3.00 equiv), and 2-methyltetrahydrofuran (2.00 mL) was stirred at 50  $^\circ\text{C}$  for 2 h. The crude product was purified by automated flash-column chromatography (eluting with 2% acetone–hexanes initially, grading to 20% acetone–hexanes, linear gradient) to afford **6b** as a clear oil. Yield: 200 mg, 97%.  $^1\text{H}$  NMR (400 MHz,  $\text{CDCl}_3$ )  $\delta$  7.30–7.22 (m, 2H), 6.82 (t,  $J$  = 7.3 Hz, 1H), 6.67 (d,  $J$  = 7.8 Hz, 2H), 4.38 (s, 1H), 3.85 (s, 2H),

1.57 (s, 9H).  $^{13}\text{C}$  NMR (101 MHz,  $\text{CDCl}_3$ )  $\delta$  170.2, 147.2, 129.2, 117.9, 112.9, 81.8, 46.5, 28.0. IR (neat,  $\text{cm}^{-1}$ ): 3401, 2977, 1732, 1604, 1508, 1150. Anal. Calcd. for  $\text{C}_{12}\text{H}_{17}\text{NO}_2$ : C, 69.54; H, 8.27, Found: C, 69.26; H, 8.25.

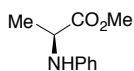

**6c**

Following the general procedure, a mixture of L-Ala-OMe (**5c**, 103 mg, 1.00 mmol, 1.00 equiv), phenyl trifluoromethanesulfonate (162  $\mu\text{L}$ , 1.00 mmol, 1 equiv), **P1** (43.0 mg, 50.0  $\mu\text{mol}$ , 5.0 mol%), cesium carbonate (977 mg, 3.00 mmol, 3.00 equiv), and 2-methyltetrahydrofuran (2.00 mL) was stirred at 50  $^\circ\text{C}$  for 2 h. The crude product was purified by automated flash-column chromatography with a new column (eluting with 1% acetone–pentane initially, grading to 10% acetone–pentane, linear gradient) to afford **6c** as a yellow oil. Yield: 157 mg, 88%.  $^1\text{H}$  NMR (400 MHz,  $\text{CDCl}_3$ )  $\delta$  7.21 (dd,  $J = 8.5, 7.4$  Hz, 2H), 6.77 (t,  $J = 7.3$  Hz, 1H), 6.64 (d,  $J = 7.7$  Hz, 2H), 4.25 (br s, 1H), 4.19 (q,  $J = 7.0$  Hz, 1H), 3.75 (s, 3H), 1.50 (d,  $J = 6.9$  Hz, 3H).  $^{13}\text{C}$  NMR (100 MHz,  $\text{CDCl}_3$ )  $\delta$  175.1, 146.6, 129.3, 118.3, 113.3, 52.2, 51.9, 18.9. IR (neat,  $\text{cm}^{-1}$ ): 3394, 2951, 1732, 1602, 1506, 1156, 748, 692. Anal. Calcd. for  $\text{C}_{10}\text{H}_{13}\text{NO}_2$ : C, 67.02; H, 7.31, Found: C, 67.14; H, 7.15.  $[\alpha]_{\text{D}}^{24} -53.6$  ( $c$  1.0,  $\text{CHCl}_3$ ). HPLC analysis (OJ-H, 10% IPA–hexanes, 1.0 mL/min, 254 nm) indicated 95% ee: tR (minor) = 16.2 min, tR (major) = 24.2 min.

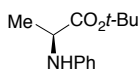

**6d**

Following the general procedure, a mixture of L-Ala-Ot-Bu (**5d**, 145 mg, 1.00 mmol, 1.00 equiv), phenyl trifluoromethanesulfonate (162  $\mu\text{L}$ , 1.00 mmol, 1 equiv), **P1** (43.0 mg, 50.0  $\mu\text{mol}$ , 5.0 mol%), cesium carbonate (977 mg, 3.00 mmol, 3.00 equiv), and 2-methyltetrahydrofuran (2.00 mL) was stirred at 50  $^\circ\text{C}$  for 2 h. The crude product was purified by automated flash-column chromatography (eluting with 1% acetone–pentane initially, grading to 10% acetone–pentane, linear gradient) to afford **6d** as a clear oil. Yield: 198 mg, 90%.  $^1\text{H}$  NMR (400 MHz,  $\text{CDCl}_3$ )  $\delta$  7.09–7.03 (m, 2H), 6.62 (t,  $J = 7.3$  Hz, 1H), 6.51 (d,  $J = 7.7$  Hz, 2H), 4.16 (br s, 1H), 3.92 (q,  $J = 6.9$  Hz, 1H), 1.33 (s, 9H), 1.32 (s, 3H).  $^{13}\text{C}$  NMR (100 MHz,  $\text{CDCl}_3$ )  $\delta$  173.8, 146.8, 129.2, 118.1, 113.5, 81.4, 52.6, 28.0, 18.8. IR (neat,  $\text{cm}^{-1}$ ): 3395, 2977, 1726, 1603, 1505, 1145, 746, 691. Anal. Calcd. for  $\text{C}_{13}\text{H}_{19}\text{NO}_2$ : C, 70.56; H, 8.65, Found: C, 70.70; H, 8.47.  $[\alpha]_{\text{D}}^{24} -38.6$  ( $c$  1.0,  $\text{CHCl}_3$ ). HPLC analysis (OJ-H, 5% IPA–hexanes, 0.8 mL/min, 254 nm) indicated 96% ee: tR (minor) = 8.7 min, tR (major) = 9.3 min.

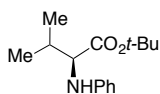

**6e**

Following the general procedure, a mixture of L-Val-Ot-Bu (**5e**, 173 mg, 1.00 mmol, 1.00 equiv), phenyl trifluoromethanesulfonate (162  $\mu\text{L}$ , 1.00 mmol, 1 equiv), **P1** (43.0 mg, 50.0  $\mu\text{mol}$ , 5.0 mol%), cesium carbonate (977 mg, 3.00 mmol, 3.00 equiv), and 2-methyltetrahydrofuran (2.00 mL) was stirred at 50  $^\circ\text{C}$  for 14 h. The crude product was purified by automated flash-column chromatography (eluting with 1% EtOAc–hexanes initially, grading to 10% EtOAc–hexanes, linear gradient) to afford **6e** as a white solid. Yield: 208 mg, 83%. mp = 82–84  $^\circ\text{C}$ .  $^1\text{H}$  NMR (400 MHz,  $\text{CDCl}_3$ )  $\delta$  7.21–7.14 (m, 2H), 6.73 (t,  $J = 7.3$  Hz, 1H), 6.65 (d,  $J = 7.7$  Hz, 2H), 4.22 (br s, 1H), 3.77 (d,  $J = 5.6$  Hz, 1H), 2.13 (dp,  $J = 13.5, 6.8$  Hz, 1H), 1.44 (s, 9H), 1.05 (dd,  $J = 8.9, 6.8$  Hz, 6H).  $^{13}\text{C}$  NMR (100 MHz,  $\text{CDCl}_3$ )  $\delta$  172.8, 147.7, 129.3, 118.1, 113.8, 81.6, 63.0, 31.6, 28.2, 19.1, 18.8. IR (neat,  $\text{cm}^{-1}$ ): 3382, 2970, 1707, 1604, 1257, 1156, 745, 691. Anal. Calcd. for  $\text{C}_{15}\text{H}_{23}\text{NO}_2$ : C, 72.25; H, 9.30, Found: C, 72.35; H, 9.44.  $[\alpha]_{\text{D}}^{24} -70.1$  ( $c$  1.0,  $\text{CHCl}_3$ ). HPLC

analysis (OJ-H, 0.5% IPA–hexanes, 0.5 mL/min, 254 nm) indicated 87% ee: tR (major) = 12.3 min, tR (minor) = 13.3 min.

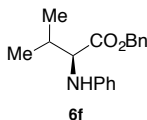

Following the general procedure, a mixture of L-Val-OBn (**5f**, 207 mg, 1.00 mmol, 1.00 equiv), phenyl trifluoromethanesulfonate (162  $\mu$ L, 1.00 mmol, 1 equiv), **P1** (43.0 mg, 50.0  $\mu$ mol, 5.0 mol%), cesium carbonate (977 mg, 3.00 mmol, 3.00 equiv), and 2-methyltetrahydrofuran (2.00 mL) was stirred at 50  $^{\circ}$ C for 14 h. The crude product was purified by automated flash-column chromatography (eluting with 2% ether–pentane initially, grading to 20% ether–pentane, linear gradient) to afford **6f** as a clear oil. Yield: 216 mg, 76%.  $^1\text{H}$  NMR (400 MHz,  $\text{CDCl}_3$ )  $\delta$  7.48–7.36 (m, 5H), 7.27 (t,  $J$  = 7.9 Hz, 2H), 6.85 (t,  $J$  = 7.3 Hz, 1H), 6.75 (d,  $J$  = 7.8 Hz, 2H), 5.25 (app d,  $J$  = 2.9 Hz, 2H), 4.27 (br d,  $J$  = 7.8 Hz, 1H), 4.04 (t,  $J$  = 7.1 Hz, 1H), 2.31–2.18 (m,  $J$  = 6.7 Hz, 1H), 1.13 (dd,  $J$  = 10.2, 6.8 Hz, 6H).  $^{13}\text{C}$  NMR (100 MHz,  $\text{CDCl}_3$ )  $\delta$  173.6, 147.4, 135.6, 129.3, 128.6, 128.4, 128.3, 118.3, 113.7, 66.7, 62.6, 31.6, 19.2, 18.7. IR (neat,  $\text{cm}^{-1}$ ): 3384, 2961, 1729, 1601, 1145, 746, 691. Anal. Calcd. for  $\text{C}_{18}\text{H}_{21}\text{NO}_2$ : C, 76.30; H, 7.47, Found: C, 76.34; H, 7.39.  $[\alpha]_{\text{D}}^{24}$  –40.6 ( $c$  1.0,  $\text{CHCl}_3$ ). HPLC analysis (OJ-H, 10% IPA–hexanes, 1.0 mL/min, 254 nm) indicated 94% ee: tR (minor) = 19.0 min, tR (major) = 24.0 min.

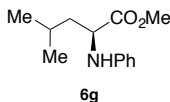

Following the general procedure, a mixture of L-Leu-OMe (**5g**, 145 mg, 1.00 mmol, 1.00 equiv), phenyl trifluoromethanesulfonate (162  $\mu$ L, 1.00 mmol, 1 equiv), **P1** (43.0 mg, 50.0  $\mu$ mol, 5.0 mol%), cesium carbonate (977 mg, 3.00 mmol, 3.00 equiv), and 2-methyltetrahydrofuran (2.00 mL) was stirred at 50  $^{\circ}$ C for 2 h. The crude product was purified by automated flash-column chromatography (eluting with 1% acetone–pentane initially, grading to 10% acetone–pentane, linear gradient) to afford **6g** as a white solid. Yield: 198 mg, 90%. mp = 49–50  $^{\circ}$ C.  $^1\text{H}$  NMR (400 MHz,  $\text{CDCl}_3$ )  $\delta$  7.20 (dd,  $J$  = 8.6, 7.3 Hz, 2H), 6.77 (t,  $J$  = 7.3 Hz, 1H), 6.65 (d,  $J$  = 7.8 Hz, 2H), 4.17–4.11 (m, 1H), 4.08 (br s, 1H), 3.72 (s, 3H), 1.84 (hept,  $J$  = 6.3 Hz, 1H), 1.69 (td,  $J$  = 7.0, 2.7 Hz, 2H), 1.01 (dd,  $J$  = 18.1, 6.6 Hz, 6H).  $^{13}\text{C}$  NMR (100 MHz,  $\text{CDCl}_3$ )  $\delta$  175.2, 147.0, 129.4, 118.4, 113.5, 55.2, 52.0, 42.4, 24.9, 22.8, 22.3. IR (neat,  $\text{cm}^{-1}$ ): 3383, 2954, 1718, 1602, 745, 689. Anal. Calcd. for  $\text{C}_{13}\text{H}_{19}\text{NO}_2$ : C, 70.56; H, 8.65, Found: C, 70.68; H, 8.67.  $[\alpha]_{\text{D}}^{24}$  –70.7 ( $c$  1.0,  $\text{CHCl}_3$ ). HPLC analysis (OJ-H, 5% IPA–hexanes, 0.8 mL/min, 254 nm) indicated 96% ee: tR (minor) = 10.2 min, tR (major) = 15.0 min.

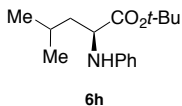

Following the general procedure, a mixture of L-Leu-O $t$ -Bu (**5h**, 187 mg, 1.00 mmol, 1.00 equiv), phenyl trifluoromethanesulfonate (162  $\mu$ L, 1.00 mmol, 1 equiv), **P1** (43.0 mg, 50.0  $\mu$ mol, 5.0 mol%), cesium carbonate (977 mg, 3.00 mmol, 3.00 equiv), and 2-methyltetrahydrofuran (2.00 mL) was stirred at 50  $^{\circ}$ C for 2 h. The crude product was purified by automated flash-column chromatography (eluting with 2% EtOAc–hexanes initially, grading to 10% EtOAc–hexanes, linear gradient) to afford **6h** as a white solid. Yield: 231 mg, 88%. mp = 68–70  $^{\circ}$ C.  $^1\text{H}$  NMR (400 MHz,  $\text{CDCl}_3$ )  $\delta$  7.23–7.15 (m, 2H), 6.75 (t,  $J$  = 7.3 Hz, 1H), 6.66 (d,  $J$  = 7.7 Hz, 2H), 4.06 (br s, 1H), 4.03–3.98 (m, 1H), 1.87 (dp,  $J$  = 13.4, 6.7 Hz, 1H), 1.67 (tt,  $J$  = 13.9, 6.5 Hz, 2H), 1.45 (s, 9H), 1.02 (dd,  $J$  = 20.8, 6.6 Hz, 6H).  $^{13}\text{C}$  NMR (100 MHz,  $\text{CDCl}_3$ )  $\delta$  174.0, 147.3, 129.2, 118.1, 113.6, 81.3, 55.9, 42.4, 28.0, 25.0, 22.8, 22.5. IR (neat,  $\text{cm}^{-1}$ ): 3378, 2955, 1703, 1604, 1305,

1149, 761, 693. Anal. Calcd. for C<sub>16</sub>H<sub>25</sub>NO<sub>2</sub>: C, 72.97; H, 9.57, Found: C, 73.16; H, 9.69. [ $\alpha$ ]<sub>D</sub><sup>24</sup> – 70.1 (*c* 1.0, CHCl<sub>3</sub>). HPLC analysis (OJ-H, 1% IPA–hexanes, 0.8 mL/min, 254 nm) indicated 97% ee: tR (minor) = 6.3 min, tR (major) = 7.0 min.

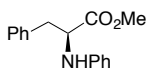

6i

Following the general procedure, a mixture of L-Phe-OMe (**5i**, 179 mg, 1.00 mmol, 1.00 equiv), phenyl trifluoromethanesulfonate (162  $\mu$ L, 1.00 mmol, 1 equiv), **P1** (43.0 mg, 50.0  $\mu$ mol, 5.0 mol%), cesium carbonate (977 mg, 3.00 mmol, 3.00 equiv), and 2-methyltetrahydrofuran (2.00 mL) was stirred at 50 °C for 2 h. The crude product was purified by automated flash-column chromatography with a new column (eluting with 2% acetone–hexanes initially, grading to 20% acetone–hexanes, linear gradient) to afford **6i** as a yellow oil. Yield: 244 mg, 96%. <sup>1</sup>H NMR (400 MHz, CDCl<sub>3</sub>)  $\delta$  7.38 (dt, *J* = 14.7, 6.9 Hz, 3H), 7.32–7.25 (m, 4H), 6.87 (t, *J* = 7.3 Hz, 1H), 6.73 (d, *J* = 7.8 Hz, 2H), 4.50 (t, *J* = 6.2 Hz, 1H), 4.39 (br s, 1H), 3.75 (s, 3H), 3.31–3.18 (m, 2H). <sup>13</sup>C NMR (100 MHz, CDCl<sub>3</sub>)  $\delta$  173.5, 146.3, 136.3, 129.3, 129.2, 128.5, 127.0, 118.4, 113.6, 57.8, 52.0, 38.6. IR (neat, cm<sup>-1</sup>): 3353, 3026, 1731, 1601, 1496, 692. Anal. Calcd. for C<sub>16</sub>H<sub>17</sub>NO<sub>2</sub>: C, 75.72; H, 6.71, Found: C, 75.42; H, 6.80. [ $\alpha$ ]<sub>D</sub><sup>24</sup> +38.2 (*c* 1.0, CHCl<sub>3</sub>). HPLC analysis (OJ-H, 10% IPA–hexanes, 1.0 mL/min, 254 nm) indicated 87% ee: tR (minor) = 30.7 min, tR (major) = 42.8 min.

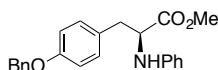

6j

Following the general procedure, a mixture of L-Tyr(Bn)-OMe (**5j**, 285 mg, 1.00 mmol, 1.00 equiv), phenyl trifluoromethanesulfonate (162  $\mu$ L, 1.00 mmol, 1 equiv), **P1** (43.0 mg, 50.0  $\mu$ mol, 5.0 mol%), cesium carbonate (977 mg, 3.00 mmol, 3.00 equiv), and 2-methyltetrahydrofuran (2.00 mL) was stirred at 50 °C for 2 h. The crude product was purified by automated flash-column chromatography with a new column (eluting with 10% ether–pentane initially, grading to 20% ether–pentane, linear gradient) to afford **6j** as a clear oil. Yield: 343 mg, 95%. <sup>1</sup>H NMR (400 MHz, CDCl<sub>3</sub>)  $\delta$  7.55–7.39 (m, 5H), 7.32–7.25 (m, 2H), 7.21–7.15 (m, 2H), 7.03–6.99 (m, 2H), 6.85 (tt, *J* = 7.4, 1.0 Hz, 1H), 6.73–6.68 (m, 2H), 5.12 (s, 2H), 4.44 (s, 1H), 4.29 (s, 1H), 3.75 (s, 3H), 3.24–3.10 (m, 2H). <sup>13</sup>C NMR (100 MHz, CDCl<sub>3</sub>)  $\delta$  173.7, 157.9, 146.4, 137.0, 130.3, 129.4, 128.6 (2C), 128.0, 127.5, 118.4, 114.9, 113.6, 70.0, 57.8, 52.1, 37.7. IR (neat, cm<sup>-1</sup>): 3397, 3030, 1736, 1602, 1506, 1239, 1175, 748, 693. Anal. Calcd. for C<sub>23</sub>H<sub>23</sub>NO<sub>3</sub>: C, 76.43; H, 6.41, Found: C, 76.23; H, 6.44. [ $\alpha$ ]<sub>D</sub><sup>24</sup> +47.6 (*c* 1.0, CHCl<sub>3</sub>). HPLC analysis (OD-H, 10% IPA–hexanes, 1.0 mL/min, 254 nm) indicated 96% ee: tR (major) = 29.8 min, tR (minor) = 54.4 min.

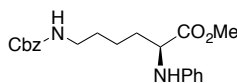

6k

Following the general procedure, a mixture of L-Lys-(Cbz)-OMe (**5k**, 294 mg, 1.00 mmol, 1.00 equiv), phenyl trifluoromethanesulfonate (162  $\mu$ L, 1.00 mmol, 1 equiv), **P1** (43.0 mg, 50.0  $\mu$ mol, 5.0 mol%), cesium carbonate (977 mg, 3.00 mmol, 3.00 equiv), and 2-methyltetrahydrofuran (2.00 mL) was stirred at 50 °C for 2 h. The crude product was purified by automated flash-column chromatography (eluting with 8% EtOAc–hexanes initially, grading to 66% EtOAc–hexanes, linear gradient) to afford **6k** as a yellow oil. Yield: 340 mg, 92%. <sup>1</sup>H NMR (400 MHz, CDCl<sub>3</sub>)  $\delta$  7.38–7.29 (m, 5H), 7.21–7.15 (m, 2H), 6.75 (tt, *J* = 7.3, 1.0 Hz, 1H), 6.64–6.59 (m, 2H), 5.11 (s, 2H), 4.94 (s, 1H), 4.21 (s, 1H), 4.06 (s, 1H), 3.71 (s, 3H), 3.19 (q, *J* = 6.4 Hz, 2H), 1.93–1.68 (m, 2H), 1.59–1.38 (m, 4H). <sup>13</sup>C NMR (100 MHz, CDCl<sub>3</sub>)  $\delta$  174.6, 156.5, 146.8, 136.6,

129.4, 128.5, 128.1 (2 C), 118.3, 113.4, 66.6, 56.4, 52.2, 40.7, 32.6, 29.7, 22.8. IR (neat,  $\text{cm}^{-1}$ ): 3357, 2949, 1702, 1603, 1506, 1242, 693. Anal. Calcd. for  $\text{C}_{21}\text{H}_{26}\text{N}_2\text{O}_4$ : C, 68.09; H, 7.07, Found: C, 68.25; H, 6.99.  $[\alpha]_{\text{D}}^{24} -20.3$  ( $c$  1.0,  $\text{CHCl}_3$ ). HPLC analysis (OD-H, 20% IPA–hexanes, 1.0 mL/min, 254 nm) indicated 94% ee:  $t_{\text{R}}$  (major) = 19.7 min,  $t_{\text{R}}$  (minor) = 40.3 min.

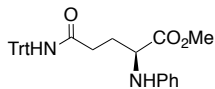

**6l**

Following the general procedure, a mixture of L-Gln-(Trt)-OMe (**5l**, 402 mg, 1.00 mmol, 1.00 equiv), phenyl trifluoromethanesulfonate (162  $\mu\text{L}$ , 1.00 mmol, 1 equiv), **P1** (43.0 mg, 50.0  $\mu\text{mol}$ , 5.0 mol%), cesium carbonate (977 mg, 3.00 mmol, 3.00 equiv), and 2-methyltetrahydrofuran (2.00 mL) was stirred at 50  $^{\circ}\text{C}$  for 2 h. The crude product was purified by automated flash-column chromatography (eluting with 1% acetone– $\text{CH}_2\text{Cl}_2$  initially, grading to 10% acetone– $\text{CH}_2\text{Cl}_2$ , linear gradient) to afford **6l** as a white solid. Yield: 420 mg, 88%. mp = 187–190  $^{\circ}\text{C}$ .  $^1\text{H}$  NMR (400 MHz,  $\text{CDCl}_3$ )  $\delta$  7.34–7.24 (m, 9H), 7.24–7.15 (m, 8H), 6.78 (t,  $J$  = 7.3 Hz, 1H), 6.66 (s, 1H), 6.60 (d,  $J$  = 7.7 Hz, 2H), 4.43 (br s, 1H), 4.13 (dd,  $J$  = 8.4, 5.3 Hz, 1H), 3.70 (s, 3H), 2.60–2.39 (m, 2H), 2.26–2.05 (m, 2H).  $^{13}\text{C}$  NMR (100 MHz,  $\text{CDCl}_3$ )  $\delta$  174.4, 170.8, 146.9, 144.8, 129.5, 128.8, 128.1, 127.2, 118.7, 113.8, 70.8, 56.5, 52.4, 33.6, 28.0. IR (neat,  $\text{cm}^{-1}$ ): 3271, 1741, 1647, 1536, 748, 697. Anal. Calcd. for  $\text{C}_{31}\text{H}_{30}\text{N}_2\text{O}_3$ : C, 77.80; H, 6.32, Found: C, 77.40; H, 6.39.  $[\alpha]_{\text{D}}^{24} -17.1$  ( $c$  1.0,  $\text{CHCl}_3$ ). HPLC analysis (AD-H, 10% IPA–hexanes, 1.0 mL/min, 254 nm) indicated 92% ee:  $t_{\text{R}}$  (minor) = 10.5 min,  $t_{\text{R}}$  (major) = 30.1 min.

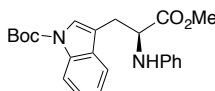

**6m**

Following the general procedure, a mixture of L-Trp-(Boc)-OMe (**5m**, 318 mg, 1.00 mmol, 1.00 equiv), phenyl trifluoromethanesulfonate (162  $\mu\text{L}$ , 1.00 mmol, 1 equiv), **P1** (43.0 mg, 50.0  $\mu\text{mol}$ , 5.0 mol%), cesium carbonate (977 mg, 3.00 mmol, 3.00 equiv), and 2-methyltetrahydrofuran (2.00 mL) was stirred at 50  $^{\circ}\text{C}$  for 2 h. The crude product was purified by automated flash-column chromatography with a new column (eluting with 10% ether–pentane initially, grading to 20% ether–pentane, linear gradient) to afford **6m** as a white solid. Yield: 378 mg, 96%. mp = 94–96  $^{\circ}\text{C}$ .  $^1\text{H}$  NMR (400 MHz,  $\text{CDCl}_3$ )  $\delta$  8.03 (d,  $J$  = 7.5 Hz, 1H), 7.40 (d,  $J$  = 7.7 Hz, 1H), 7.34 (s, 1H), 7.22 (t,  $J$  = 7.7 Hz, 1H), 7.16–7.05 (m, 3H), 6.66 (t,  $J$  = 7.3 Hz, 1H), 6.53 (d,  $J$  = 7.7 Hz, 2H), 4.38 (t,  $J$  = 5.9 Hz, 1H), 4.17 (s, 1H), 3.55 (s, 3H), 3.16 (qd,  $J$  = 14.6, 5.8 Hz, 2H), 1.57 (s, 9H).  $^{13}\text{C}$  NMR (100 MHz,  $\text{CDCl}_3$ )  $\delta$  173.7, 149.7, 146.4, 135.5, 130.6, 129.5, 124.6, 124.3, 122.6, 118.9, 118.6, 115.4, 115.3, 113.7, 83.8, 56.6, 52.3, 28.3, 28.2. IR (neat,  $\text{cm}^{-1}$ ): 3349, 2970, 1711, 1251, 1149, 745. Anal. Calcd. for  $\text{C}_{23}\text{H}_{26}\text{N}_2\text{O}_4$ : C, 70.03; H, 6.64, Found: C, 69.50; H, 6.67.  $[\alpha]_{\text{D}}^{24} +33.3$  ( $c$  1.0,  $\text{CHCl}_3$ ). HPLC analysis (OJ-H, 10% IPA–hexanes, 1.0 mL/min, 254 nm) indicated 93% ee:  $t_{\text{R}}$  (major) = 13.4 min,  $t_{\text{R}}$  (minor) = 16.7 min.

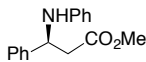

**6n**

Following the general procedure, a mixture of L- $\beta$ -Phe-OMe (**5n**, 179 mg, 1.00 mmol, 1.00 equiv), phenyl trifluoromethanesulfonate (162  $\mu\text{L}$ , 1.00 mmol, 1 equiv), **P1** (43.0 mg, 50.0  $\mu\text{mol}$ , 5.0 mol%), cesium carbonate (977 mg, 3.00 mmol, 3.00 equiv), and 2-methyltetrahydrofuran (2.00 mL) was stirred at 50  $^{\circ}\text{C}$  for 14 h. The crude product was purified by automated flash-column chromatography with a new column (eluting with 5% ether–pentane initially, grading to 10% ether–pentane, linear gradient) to afford **6n** as a white solid. Yield: 198 mg, 78%. mp = 102–103  $^{\circ}\text{C}$ .  $^1\text{H}$  NMR (400 MHz,  $\text{CDCl}_3$ )  $\delta$  7.47–7.41 (m, 2H), 7.40–7.36 (m, 2H), 7.33–7.27 (m,



1H), 7.20–7.13 (m, 2H), 6.74 (t,  $J = 7.3$  Hz, 1H), 6.63 (d,  $J = 7.7$  Hz, 2H), 4.91 (t,  $J = 6.7$  Hz, 1H), 4.61 (s, 1H), 3.70 (s, 3H), 2.88 (dd,  $J = 6.7, 1.9$  Hz, 2H).  $^{13}\text{C}$  NMR (100 MHz,  $\text{CDCl}_3$ )  $\delta$  171.6, 146.8, 142.3, 129.2, 128.9, 127.6, 126.3, 117.9, 113.8, 55.0, 52.0, 42.7. IR (neat,  $\text{cm}^{-1}$ ): 3375, 1716, 1603, 1289, 749, 693. Anal. Calcd. for  $\text{C}_{16}\text{H}_{17}\text{NO}_2$ : C, 75.27; H, 6.71, Found: C, 75.01; H, 6.73.  $[\alpha]_{\text{D}}^{24} +1.3$  ( $c$  1.0,  $\text{CHCl}_3$ ). HPLC analysis (OD-H, 5% IPA–hexanes, 0.8 mL/min, 254 nm) indicated 99% ee: tR (major) = 19.8 min, tR (minor) = 21.6 min.

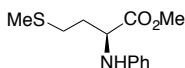

6o

Following the general procedure, a mixture of L-Met-OMe (**5o**, 163 mg, 1.00 mmol, 1.00 equiv), phenyl trifluoromethanesulfonate (162  $\mu\text{L}$ , 1.00 mmol, 1 equiv), **P1** (43.0 mg, 50.0  $\mu\text{mol}$ , 5.0 mol%), cesium carbonate (977 mg, 3.00 mmol, 3.00 equiv), and 2-methyltetrahydrofuran (2.00 mL) was stirred at 50  $^\circ\text{C}$  for 2 h. The crude product was purified by automated flash-column chromatography with a new column (eluting with 5% EtOAc–pentane) to afford **6o** as a yellow oil. Yield: 202 mg, 85%.  $^1\text{H}$  NMR (400 MHz,  $\text{CDCl}_3$ )  $\delta$  7.19 (dd,  $J = 8.6, 7.3$  Hz, 2H), 6.76 (tt,  $J = 7.3, 1.1$  Hz, 1H), 6.67 (dd,  $J = 8.7, 1.1$  Hz, 2H), 4.28 (dd,  $J = 7.6, 5.3$  Hz, 1H), 4.24 (br s, 1H), 3.73 (s, 3H), 2.64 (t,  $J = 7.2$  Hz, 2H), 2.20–2.12 (m, 1H), 2.11 (s, 3H), 2.03 (dt,  $J = 14.1, 7.1$  Hz, 1H).  $^{13}\text{C}$  NMR (100 MHz,  $\text{CDCl}_3$ )  $\delta$  174.2, 146.7, 129.4, 118.5, 113.6, 55.5, 52.3, 32.3, 30.3, 15.5. IR (neat,  $\text{cm}^{-1}$ ): 3379, 2916, 1733, 1602, 1506, 1167, 748, 692. Anal. Calcd. for  $\text{C}_{12}\text{H}_{17}\text{NO}_2\text{S}$ : C, 60.22; H, 7.16, Found: C, 60.34; H, 6.97.  $[\alpha]_{\text{D}}^{24} -21.9$  ( $c$  1.0,  $\text{CHCl}_3$ ). HPLC analysis (OJ-H, 10% IPA–hexanes, 1.0 mL/min, 254 nm) indicated 80% ee: tR (minor) = 20.3 min, tR (major) = 29.6 min.

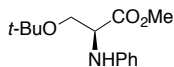

6p

Following the general procedure, a mixture of L-Ser-(*t*-Bu)-OMe (**5p**, 175 mg, 1.00 mmol, 1.00 equiv), phenyl trifluoromethanesulfonate (162  $\mu\text{L}$ , 1.00 mmol, 1 equiv), **P1** (43.0 mg, 50.0  $\mu\text{mol}$ , 5.0 mol%), cesium carbonate (977 mg, 3.00 mmol, 3.00 equiv), and 2-methyltetrahydrofuran (2.00 mL) was stirred at 50  $^\circ\text{C}$  for 2 h. The crude product was purified by automated flash-column chromatography (eluting with 1% acetone–pentane initially, grading to 10% acetone–pentane, linear gradient) to afford **6p** as a white solid. Yield: 233 mg, 93%. mp = 47–50  $^\circ\text{C}$ .  $^1\text{H}$  NMR (400 MHz,  $\text{CDCl}_3$ )  $\delta$  7.21–7.14 (m, 2H), 6.75 (t,  $J = 7.3$  Hz, 1H), 6.67–6.60 (m, 2H), 4.20 (t,  $J = 4.1$  Hz, 1H), 3.79 (dd,  $J = 8.8, 4.0$  Hz, 1H), 3.73 (s, 3H), 3.69 (dd,  $J = 8.8, 4.2$  Hz, 1H), 1.17 (s, 9H).  $^{13}\text{C}$  NMR (100 MHz,  $\text{CDCl}_3$ )  $\delta$  172.9, 146.9, 129.4, 118.5, 113.8, 73.6, 62.5, 57.4, 52.2, 27.5. IR (neat,  $\text{cm}^{-1}$ ): 3401, 2978, 1748, 1604, 1508, 1147, 1102, 755. Anal. Calcd. for  $\text{C}_{14}\text{H}_{21}\text{NO}_3$ : C, 66.91; H, 8.42, Found: C, 67.20; H, 8.48.  $[\alpha]_{\text{D}}^{24} -10.7$  ( $c$  1.0,  $\text{CHCl}_3$ ). HPLC analysis (OJ-H, 10% IPA–hexanes, 1.0 mL/min, 254 nm) indicated 71% ee: tR (minor) = 7.1 min, tR (major) = 10.9 min.

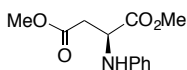

6q

Following the general procedure, a mixture of L-Asp-(Me)-OMe (**5q**, 161 mg, 1.00 mmol, 1.00 equiv), phenyl trifluoromethanesulfonate (162  $\mu\text{L}$ , 1.00 mmol, 1 equiv), **P1** (43.0 mg, 50.0  $\mu\text{mol}$ , 5.0 mol%), cesium carbonate (977 mg, 3.00 mmol, 3.00 equiv), and 2-methyltetrahydrofuran (2.00 mL) was stirred at 50  $^\circ\text{C}$  for 2 h. The crude product was purified by automated flash-column chromatography (eluting with 6% EtOAc–hexanes initially, grading to 50% EtOAc–hexanes, linear gradient) to afford **6q** as a yellow oil. Yield: 231 mg, 98%.  $^1\text{H}$  NMR (400 MHz,

CDCl<sub>3</sub>)  $\delta$  7.23–7.15 (m, 2H), 6.77 (t,  $J$  = 7.3 Hz, 1H), 6.67 (d,  $J$  = 7.7 Hz, 2H), 4.56–4.42 (m, 2H), 3.75 (s, 3H), 3.70 (s, 3H), 2.89 (d,  $J$  = 5.0 Hz, 2H). <sup>13</sup>C NMR (100 MHz, CDCl<sub>3</sub>)  $\delta$  172.8, 171.0, 146.2, 129.4, 118.7, 113.7, 53.4, 52.6, 52.0, 37.1. IR (neat, cm<sup>-1</sup>): 3383, 2952, 1729, 1602, 1168, 749. Anal. Calcd. for C<sub>12</sub>H<sub>15</sub>NO<sub>4</sub>: C, 60.75; H, 6.37, Found: C, 61.03; H, 6.46.  $[\alpha]_D^{24}$  +6.8 ( $c$  1.0, CHCl<sub>3</sub>). HPLC analysis (OJ-H, 10% IPA–hexanes, 1.0 mL/min, 254 nm) indicated 74% ee: tR (minor) = 34.0 min, tR (major) = 58.1 min.

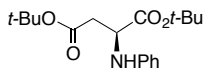

6r

Following the general procedure, a mixture of L-Asp-(*t*-Bu)-O*t*-Bu (**5r**, 245 mg, 1.00 mmol, 1.00 equiv), phenyl trifluoromethanesulfonate (162  $\mu$ L, 1.00 mmol, 1 equiv), **P1** (43.0 mg, 50.0  $\mu$ mol, 5.0 mol%), cesium carbonate (977 mg, 3.00 mmol, 3.00 equiv), and 2-methyltetrahydrofuran (2.00 mL) was stirred at 50 °C for 2 h. The crude product was purified by automated flash-column chromatography (eluting with 1% acetone–hexanes initially, grading to 10% acetone–hexanes, linear gradient) to afford **6r** as a white solid. Yield: 290 mg, 90%. mp = 72–74 °C. <sup>1</sup>H NMR (400 MHz, CDCl<sub>3</sub>)  $\delta$  7.22–7.14 (m, 2H), 6.78–6.71 (m, 1H), 6.68–6.63 (m, 2H), 4.49 (app d,  $J$  = 8.4 Hz, 1H), 4.28 (dt,  $J$  = 8.4, 5.6 Hz, 1H), 2.75 (d,  $J$  = 5.6 Hz, 2H), 1.46 (s, 9H), 1.45 (s, 9H). <sup>13</sup>C NMR (100 MHz, CDCl<sub>3</sub>)  $\delta$  171.6, 169.9, 146.8, 129.3, 118.4, 113.8, 82.1, 81.3, 54.1, 38.6, 28.2, 28.0. IR (neat, cm<sup>-1</sup>): 3400, 2977, 1732, 1140, 747, 696. Anal. Calcd. for C<sub>18</sub>H<sub>27</sub>NO<sub>4</sub>: C, 67.26; H, 8.47, Found: C, 67.42; H, 8.54.  $[\alpha]_D^{24}$  -1.1 ( $c$  1.0, CHCl<sub>3</sub>). HPLC analysis (OJ-H, 10% IPA–hexanes, 1.0 mL/min, 254 nm) indicated 80% ee: tR (minor) = 4.7 min, tR (major) = 6.0 min.

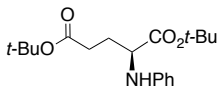

6s

Following the general procedure, a mixture of L-Glu-(*t*-Bu)-O*t*-Bu (**5s**, 259 mg, 1.00 mmol, 1.00 equiv), phenyl trifluoromethanesulfonate (162  $\mu$ L, 1.00 mmol, 1 equiv), **P1** (43.0 mg, 50.0  $\mu$ mol, 5.0 mol%), cesium carbonate (977 mg, 3.00 mmol, 3.00 equiv), and 2-methyltetrahydrofuran (2.00 mL) was stirred at 50 °C for 2 h. The crude product was purified by automated flash-column chromatography (eluting with 1% acetone–pentane initially, grading to 10% acetone–pentane, linear gradient) to afford **6s** as a yellow solid. Yield: 313 mg, 93%. mp = 61–64 °C. <sup>1</sup>H NMR (400 MHz, CDCl<sub>3</sub>)  $\delta$  7.16 (dd,  $J$  = 8.5, 7.3 Hz, 2H), 6.75–6.70 (m, 1H), 6.65–6.60 (m, 2H), 4.23 (br s, 1H), 4.00 (dd,  $J$  = 7.6, 5.5 Hz, 1H), 2.47–2.31 (m, 2H), 2.17–1.95 (m, 2H), 1.45 (s, 9H), 1.44 (s, 9H). <sup>13</sup>C NMR (100 MHz, CDCl<sub>3</sub>)  $\delta$  172.9, 172.4, 147.1, 129.3, 118.2, 113.6, 81.8, 80.6, 56.8, 31.7, 28.2, 28.1 (2C). IR (neat, cm<sup>-1</sup>): 3363, 2977, 1722, 1704, 1605, 1155, 752, 693. Anal. Calcd. for C<sub>19</sub>H<sub>29</sub>NO<sub>4</sub>: C, 68.03; H, 8.71, Found: C, 68.03; H, 8.70.  $[\alpha]_D^{24}$  -27.7 ( $c$  1.0, CHCl<sub>3</sub>). HPLC analysis (OJ-H, 5% IPA–hexanes, 0.8 mL/min, 254 nm) indicated 97% ee: tR (minor) = 6.4 min, tR (major) = 7.8 min.

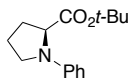

6t

Following the general procedure, a mixture of L-Pro-O*t*-Bu (**5t**, 171 mg, 1.00 mmol, 1.00 equiv), phenyl trifluoromethanesulfonate (162  $\mu$ L, 1.00 mmol, 1 equiv), **P2** (46.0 mg, 50.0  $\mu$ mol, 5.0 mol%), cesium carbonate (977 mg, 3.00 mmol, 3.00 equiv), and 2-methyltetrahydrofuran (2.00 mL) was stirred at 80 °C for 14 h. The crude product was purified by automated flash-column chromatography with a new column (eluting with 1% ether–pentane initially, grading to 10% ether–pentane, linear gradient) to afford **6t** as a clear oil. Yield: 177 mg, 72%. <sup>1</sup>H NMR (400

MHz, CDCl<sub>3</sub>)  $\delta$  7.30 (td,  $J$  = 7.3, 2.0 Hz, 2H), 6.78 (tt,  $J$  = 7.2, 1.1 Hz, 1H), 6.64 (d,  $J$  = 7.9 Hz, 2H), 4.21 (dd,  $J$  = 8.4, 2.4 Hz, 1H), 3.60 (dt,  $J$  = 7.9, 4.1 Hz, 1H), 3.44 (q,  $J$  = 7.8 Hz, 1H), 2.36–2.05 (m, 4H), 1.51 (s, 9H). <sup>13</sup>C NMR (100 MHz, CDCl<sub>3</sub>)  $\delta$  173.7, 146.8, 129.1, 116.3, 111.9, 80.9, 61.6, 48.1, 30.7, 28.0, 23.8. IR (neat, cm<sup>-1</sup>): 2975, 1737, 1598, 1505, 1365, 1144, 745, 670. Anal. Calcd. for C<sub>15</sub>H<sub>21</sub>NO<sub>2</sub>: C, 72.84; H, 8.56, Found: C, 72.75; H, 8.53.  $[\alpha]_D^{24}$  –53.0 (*c* 1.0, CHCl<sub>3</sub>). HPLC analysis (OJ-H, 5% IPA–hexanes, 0.8 mL/min, 254 nm) indicated 44% ee: tR (minor) = 7.0 min, tR (major) = 10.3 min.

Repeating the reaction with stirring at 50 °C for 2 h afforded **6t** as a clear oil. Yield 20.6 mg, 9%. HPLC analysis (OJ-H, 5% IPA–hexanes, 0.8 mL/min, 254 nm) indicated 97% ee: tR (minor) = 7.2 min, tR (major) = 10.7 min.

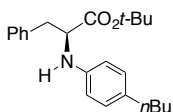

**8a**

Following the general procedure, a mixture of L-Phe-*O**t*-Bu (**5a**, 221 mg, 1.00 mmol, 1.00 equiv), 4-*n*-butylphenyl trifluoromethanesulfonate (**7a**, 282 mg, 1.00 mmol, 1 equiv), **P1** (43.0 mg, 50.0  $\mu$ mol, 5.0 mol%), cesium carbonate (977 mg, 3.00 mmol, 3.00 equiv), and 2-methyltetrahydrofuran (2.00 mL) was stirred at 50 °C for 2 h. The crude product was purified by automated flash-column chromatography (eluting with 5% ether–hexanes initially, grading to 40% ether–hexanes, linear gradient) to afford **8a** as a yellow solid. Yield: 318 mg, 90%. mp = 50–52 °C. <sup>1</sup>H NMR (400 MHz, CDCl<sub>3</sub>)  $\delta$  7.41–7.28 (m, 5H), 7.11–7.05 (m, 2H), 6.69–6.62 (m, 2H), 4.32 (t,  $J$  = 6.4 Hz, 1H), 4.19 (br s, 1H), 3.24–3.12 (m, 2H), 2.64–2.55 (m, 2H), 1.65 (tt,  $J$  = 8.9, 6.8 Hz, 2H), 1.43 (br s, 11H), 1.02 (t,  $J$  = 7.3 Hz, 3H). <sup>13</sup>C NMR (100 MHz, CDCl<sub>3</sub>)  $\delta$  172.4, 144.5, 136.9, 132.6, 129.5, 129.1, 128.3, 126.8, 113.8, 81.5, 58.6, 38.8, 34.8, 34.0, 27.9, 22.3, 14.0. IR (neat, cm<sup>-1</sup>): 3368, 2924, 1726, 1518, 1149, 699. Anal. Calcd. for C<sub>23</sub>H<sub>31</sub>NO<sub>2</sub>: C, 77.80; H, 6.32, Found: C, 77.40; H, 6.39.  $[\alpha]_D^{24}$  +18.1 (*c* 1.0, CHCl<sub>3</sub>). HPLC analysis (OJ-H, 5% IPA–hexanes, 0.8 mL/min, 254 nm) indicated 90% ee: tR (minor) = 8.4 min, tR (major) = 10.6 min.

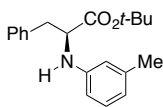

**8b**

Following the general procedure, a mixture of L-Phe-*O**t*-Bu (**5a**, 221 mg, 1.00 mmol, 1.00 equiv), *m*-tolyl trifluoromethanesulfonate (**7b**, 282 mg, 1.00 mmol, 1 equiv), **P1** (43.0 mg, 50.0  $\mu$ mol, 5.0 mol%), cesium carbonate (977 mg, 3.00 mmol, 3.00 equiv), and 2-methyltetrahydrofuran (2.00 mL) was stirred at 50 °C for 2 h. The crude product was purified by automated flash-column chromatography (eluting with 2% EtOAc–hexanes initially, grading to 20% EtOAc–hexanes, linear gradient) to afford **8b** as a clear oil. Yield: 288 mg, 93%. <sup>1</sup>H NMR (400 MHz, CDCl<sub>3</sub>)  $\delta$  7.40–7.33 (m, 2H), 7.33–7.26 (m, 3H), 7.13 (td,  $J$  = 7.4, 1.1 Hz, 1H), 6.63 (d,  $J$  = 7.5 Hz, 1H), 6.51 (app d,  $J$  = 7.6 Hz, 2H), 4.31 (t,  $J$  = 6.4 Hz, 1H), 4.23 (br s, 1H), 3.16 (d,  $J$  = 6.4 Hz, 2H), 2.34 (s, 3H), 1.42 (s, 9H). <sup>13</sup>C NMR (100 MHz, CDCl<sub>3</sub>)  $\delta$  172.4, 146.7, 139.0, 136.8, 129.6, 129.2, 128.4, 126.9, 119.2, 114.5, 110.8, 81.7, 58.3, 38.8, 28.0, 21.7. IR (neat, cm<sup>-1</sup>): 3366, 2923, 1716, 1605, 1148, 699. Anal. Calcd. for C<sub>20</sub>H<sub>25</sub>NO<sub>2</sub>: C, 77.14; H, 8.09, Found: C, 77.42; H, 8.08.  $[\alpha]_D^{24}$  +14.9 (*c* 1.0, CHCl<sub>3</sub>). HPLC analysis (OJ-H, 2% IPA–hexanes, 0.8 mL/min, 254 nm) indicated 87% ee: tR (minor) = 16.1 min, tR (major) = 20.3 min.

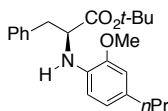

8c

Following the general procedure, a mixture of L-Phe-*Ot*-Bu (**5a**, 221 mg, 1.00 mmol, 1.00 equiv), 2-methoxy-4-propylphenyl trifluoromethanesulfonate (**7c**, 298 mg, 1.00 mmol, 1 equiv), **P1** (43.0 mg, 50.0  $\mu$ mol, 5.0 mol%), cesium carbonate (977 mg, 3.00 mmol, 3.00 equiv), and 2-methyltetrahydrofuran (2.00 mL) was stirred at 50 °C for 2 h. The crude product was purified by automated flash-column chromatography (eluting with 2% ether–hexanes initially, grading to 20% ether–hexanes, linear gradient) to afford **8c** as a clear oil. Yield: 344 mg, 93%.  $^1\text{H}$  NMR (400 MHz,  $\text{CDCl}_3$ )  $\delta$  7.40–7.27 (m, 5H), 6.76–6.68 (m, 2H), 6.61 (d,  $J$  = 7.9 Hz, 1H), 4.80 (br s, 1H), 4.31 (t,  $J$  = 6.6 Hz, 1H), 3.90 (s, 3H), 3.21 (qd,  $J$  = 13.6, 6.6 Hz, 2H), 2.63–2.55 (m, 2H), 1.70 (dq,  $J$  = 14.8, 7.4 Hz, 2H), 1.41 (s, 9H), 1.03 (t,  $J$  = 7.3 Hz, 3H).  $^{13}\text{C}$  NMR (100 MHz,  $\text{CDCl}_3$ )  $\delta$  172.5, 147.2, 137.1, 134.5, 132.0, 129.5, 128.3, 126.7, 120.6, 110.7, 110.5, 81.3, 58.5, 55.5, 39.0, 37.8, 27.9, 24.9, 13.9. IR (neat,  $\text{cm}^{-1}$ ): 3420, 2930, 1728, 1521, 1142, 699. Anal. Calcd. for  $\text{C}_{23}\text{H}_{31}\text{NO}_3$ : C, 74.76; H, 8.46, Found: C, 74.48; H, 8.40.  $[\alpha]_{\text{D}}^{24}$  +7.8 ( $c$  1.0,  $\text{CHCl}_3$ ). HPLC analysis (OJ-H, 2% IPA–hexanes, 0.8 mL/min, 254 nm) indicated 88% ee: tR (minor) = 8.9 min, tR (major) = 10.8 min.

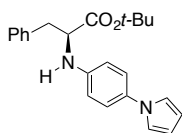

8d

Following the general procedure, a mixture of L-Phe-*Ot*-Bu (**5a**, 221 mg, 1.00 mmol, 1.00 equiv), 4-(1*H*-pyrrol-1-yl)phenyl trifluoromethanesulfonate (**7d**, 291 mg, 1.00 mmol, 1 equiv), **P1** (43.0 mg, 50.0  $\mu$ mol, 5.0 mol%), cesium carbonate (977 mg, 3.00 mmol, 3.00 equiv), and 2-methyltetrahydrofuran (2.00 mL) was stirred at 50 °C for 2 h. The crude product was purified by automated flash-column chromatography with a new column (eluting with 5% acetone–pentane initially, grading to 10% acetone–pentane, linear gradient) to afford **8d** as a white solid. Yield: 316 mg, 87%. mp = 102–103 °C.  $^1\text{H}$  NMR (400 MHz,  $\text{CDCl}_3$ )  $\delta$  7.39–7.22 (m, 7H), 7.03–7.01 (m, 2H), 6.72–6.67 (m, 2H), 6.37–6.34 (m, 2H), 4.35 (br s, 1H), 4.30 (t,  $J$  = 6.4 Hz, 1H), 3.17 (d,  $J$  = 6.3 Hz, 2H), 1.42 (s, 9H).  $^{13}\text{C}$  NMR (100 MHz,  $\text{CDCl}_3$ )  $\delta$  172.2, 144.9, 136.6, 132.7, 129.6, 128.5, 127.0, 122.4, 119.7, 114.3, 109.5, 82.1, 58.5, 38.7, 28.1. IR (neat,  $\text{cm}^{-1}$ ): 3355, 2977, 1703, 1522, 699. Anal. Calcd. for  $\text{C}_{23}\text{H}_{26}\text{N}_2\text{O}_2$ : C, 76.21; H, 7.23, Found: C, 76.36; H, 7.30.  $[\alpha]_{\text{D}}^{24}$  +28.3 ( $c$  1.0,  $\text{CHCl}_3$ ). HPLC analysis (OJ-H, 10% IPA–hexanes, 1.0 mL/min, 254 nm) indicated 91% ee: tR (major) = 38.3 min, tR (minor) = 50.5 min.

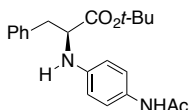

8e

Following the general procedure, a mixture of L-Phe-*Ot*-Bu (**5a**, 221 mg, 1.00 mmol, 1.00 equiv), 4-acetamidophenyl trifluoromethanesulfonate (**7e**, 283 mg, 1.00 mmol, 1 equiv), **P1** (43.0 mg, 50.0  $\mu$ mol, 5.0 mol%), cesium carbonate (977 mg, 3.00 mmol, 3.00 equiv), and 2-methyltetrahydrofuran (2.00 mL) was stirred at 50 °C for 2 h. The crude product was purified by automated flash-column chromatography (eluting with 8% acetone–hexanes initially, grading to 66% acetone–hexanes, linear gradient) to afford **8e** as a white solid. Yield: 312 mg, 88%. mp = 148–149 °C.  $^1\text{H}$  NMR (400 MHz,  $\text{CDCl}_3$ )  $\delta$  7.99 (s, 1H), 7.35–7.18 (m, 7H), 6.54 (d,  $J$  = 8.8 Hz, 2H), 4.22 (t,  $J$  = 6.4 Hz, 1H), 4.19 (br s, 1H), 3.09 (dd,  $J$  = 6.4, 2.2 Hz, 2H), 2.07 (s, 3H), 1.36 (s, 9H).  $^{13}\text{C}$  NMR (100 MHz,  $\text{CDCl}_3$ )  $\delta$  172.5, 168.6, 143.5, 136.6, 129.5, 129.3, 128.4, 126.8, 122.1,

113.8, 81.8, 58.5, 38.6, 27.9, 24.1. IR (neat,  $\text{cm}^{-1}$ ): 3301, 1722, 1670, 1517, 1146, 826, 693. HRMS. Calcd. for  $\text{C}_{21}\text{H}_{27}\text{N}_2\text{O}_3$ ,  $[\text{M}+\text{H}]$ : 355.2016, Found:  $[\text{M}+\text{H}]$ : 355.2024.  $[\alpha]_{\text{D}}^{24} +21.4$  ( $c$  1.0,  $\text{CHCl}_3$ ). HPLC analysis (AD-H, 10% IPA–hexanes, 1.0 mL/min, 254 nm) indicated 86% ee: tR (minor) = 17.4 min, tR (major) = 23.7 min.

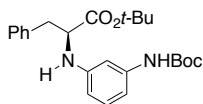

**8f**

Following the general procedure, a mixture of L-Phe-*O*t-Bu (**5a**, 221 mg, 1.00 mmol, 1.00 equiv), 3-((tert-butoxycarbonyl)amino)phenyl trifluoromethanesulfonate (**7f**, 341 mg, 1.00 mmol, 1 equiv), **P1** (43.0 mg, 50.0  $\mu\text{mol}$ , 5.0 mol%), cesium carbonate (977 mg, 3.00 mmol, 3.00 equiv), and 2-methyltetrahydrofuran (2.00 mL) was stirred at 50  $^{\circ}\text{C}$  for 2 h. The crude product was purified by automated flash-column chromatography with a new column (eluting with 10% ether–pentane initially, grading to 20% ether–pentane, linear gradient) to afford **8f** as a white solid. Yield: 404 mg, 98%. mp = 86–88  $^{\circ}\text{C}$ .  $^1\text{H}$  NMR (400 MHz,  $\text{CDCl}_3$ )  $\delta$  7.36–7.22 (m, 5H), 7.08 (t,  $J$  = 8.0 Hz, 1H), 6.62–6.55 (m, 2H), 6.33 (ddd,  $J$  = 8.1, 2.2, 0.9 Hz, 1H), 4.35 (br s, 1H), 4.30 (t,  $J$  = 6.3 Hz, 1H), 3.13 (d,  $J$  = 6.3 Hz, 2H), 1.56 (s, 9H), 1.39 (s, 9H).  $^{13}\text{C}$  NMR (100 MHz,  $\text{CDCl}_3$ )  $\delta$  172.2, 152.7, 147.3, 139.5, 136.6, 129.7, 129.6, 128.3, 126.8, 108.3, 108.2, 103.6, 81.8, 80.2, 58.0, 38.6, 28.4, 27.9. IR (neat,  $\text{cm}^{-1}$ ): 3317, 2976, 1691, 1596, 1533, 1150. Anal. Calcd. for  $\text{C}_{24}\text{H}_{32}\text{N}_2\text{O}_4$ : C, 69.88; H, 7.82, Found: C, 70.00; H, 7.86.  $[\alpha]_{\text{D}}^{24} +11.7$  ( $c$  1.0,  $\text{CHCl}_3$ ). HPLC analysis (AD-H, 10% IPA–hexanes, 0.8 mL/min, 254 nm) indicated 80% ee: tR (major) = 12.8 min, tR (minor) = 15.0 min.

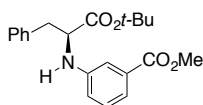

**8g**

Following the general procedure, a mixture of L-Phe-*O*t-Bu (**5a**, 221 mg, 1.00 mmol, 1.00 equiv), methyl 3-trifluoromethanesulfonyloxy-benzoate (**7g**, 284 mg, 1.00 mmol, 1 equiv), **P3** (43.0 mg, 50.0  $\mu\text{mol}$ , 5.0 mol%), cesium carbonate (977 mg, 3.00 mmol, 3.00 equiv), and 2-methyltetrahydrofuran (2.00 mL) was stirred at 50  $^{\circ}\text{C}$  for 2 h. The crude product was purified by automated flash-column chromatography (eluting with 2% EtOAc–hexanes initially, grading to 20% EtOAc–hexanes, linear gradient) to afford **8g** as a yellow oil. Yield: 343 mg, 97%.  $^1\text{H}$  NMR (400 MHz,  $\text{CDCl}_3$ )  $\delta$  7.43 (ddd,  $J$  = 7.6, 1.6, 1.0 Hz, 1H), 7.36–7.21 (m, 7H), 6.81 (ddd,  $J$  = 8.1, 2.6, 1.0 Hz, 1H), 4.42 (br s, 1H), 4.32 (t,  $J$  = 6.4 Hz, 1H), 3.91 (s, 3H), 3.15 (d,  $J$  = 6.4 Hz, 2H), 1.39 (s, 9H).  $^{13}\text{C}$  NMR (100 MHz,  $\text{CDCl}_3$ )  $\delta$  172.1, 167.4, 146.7, 136.5, 131.2, 129.6, 129.3, 128.5, 127.0, 119.4, 118.3, 114.0, 82.1, 58.1, 52.1, 38.6, 28.0. IR (neat,  $\text{cm}^{-1}$ ): 3367, 2978, 1717, 1245, 1149, 752. HRMS. Calcd. for  $\text{C}_{21}\text{H}_{26}\text{NO}_4$ ,  $[\text{M}+\text{H}]$ : 356.1856, Found:  $[\text{M}+\text{H}]$ : 356.1845  $[\alpha]_{\text{D}}^{24} +6.4$  ( $c$  1.0,  $\text{CHCl}_3$ ). HPLC analysis (OJ-H, 10% IPA–hexanes, 1.0 mL/min, 254 nm) indicated 82% ee: tR (major) = 11.9 min, tR (minor) = 18.8 min.

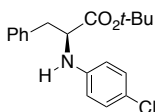

**8h**

Following the general procedure, a mixture of L-Phe-*O*t-Bu (**5a**, 221 mg, 1.00 mmol, 1.00 equiv), 4-chlorophenyl trifluoromethanesulfonate (**7h**, 261 mg, 1.00 mmol, 1 equiv), **P3** (43.0 mg, 50.0  $\mu\text{mol}$ , 5.0 mol%), cesium carbonate (977 mg, 3.00 mmol, 3.00 equiv), and 2-

methyltetrahydrofuran (2.00 mL) was stirred at 50 °C for 2 h. The crude product was purified by automated flash-column chromatography (eluting with 2% ether–hexanes initially, grading to 20% ether–hexanes, linear gradient) to afford **8h** as a white solid. Yield: 307 mg, 93%. mp = 75–78 °C. <sup>1</sup>H NMR (400 MHz, CDCl<sub>3</sub>) δ 7.40–7.26 (m, 5H), 7.21–7.15 (m, 2H), 6.62–6.56 (m, 2H), 4.37 (br s, 1H), 4.28 (t, *J* = 6.4 Hz, 1H), 3.16 (d, *J* = 6.3 Hz, 2H), 1.44 (s, 9H). <sup>13</sup>C NMR (100 MHz, CDCl<sub>3</sub>) δ 172.0, 145.3, 136.4, 129.5, 129.1, 128.4, 126.9, 122.6, 114.7, 81.9, 58.2, 38.5, 27.9. IR (neat, cm<sup>-1</sup>): 3359, 2985, 1709, 1600, 817, 698. Anal. Calcd. for C<sub>19</sub>H<sub>22</sub>ClNO<sub>2</sub>: C, 68.77; H, 6.68, Found: C, 68.88; H, 6.79. [α]<sub>D</sub><sup>24</sup> +25.8 (*c* 1.0, CHCl<sub>3</sub>). HPLC analysis (OJ-H, 5% IPA–hexanes, 0.8 mL/min, 254 nm) indicated 91% ee: tR (minor) = 15.7 min, tR (major) = 19.8 min.

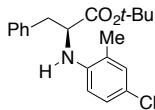

**8i**

Following the general procedure, a mixture of L-Phe-*O*t-Bu (**5a**, 221 mg, 1.00 mmol, 1.00 equiv), 4-chloro-2-methylphenyl trifluoromethanesulfonate (**7i**, 275 mg, 1.00 mmol, 1 equiv), **P3** (43.0 mg, 50.0 μmol, 5.0 mol%), cesium carbonate (977 mg, 3.00 mmol, 3.00 equiv), and 2-methyltetrahydrofuran (2.00 mL) was stirred at 50 °C for 2 h. The crude product was purified by automated flash-column chromatography (eluting with 1% ether–pentane initially, grading to 10% ether–pentane, linear gradient) to afford **8i** as a yellow oil. Yield: 291 mg, 84%. <sup>1</sup>H NMR (400 MHz, CDCl<sub>3</sub>) δ 7.37–7.26 (m, 3H), 7.26–7.21 (m, 2H), 7.12–7.05 (m, 2H), 6.52 (d, *J* = 8.2 Hz, 1H), 4.29 (t, *J* = 6.2 Hz, 1H), 4.11 (s, 1H), 3.19 (dd, *J* = 6.2, 2.3 Hz, 2H), 2.12 (s, 3H), 1.42 (s, 9H). <sup>13</sup>C NMR (100 MHz, CDCl<sub>3</sub>) δ 172.1, 143.3, 136.5, 130.1, 129.6, 128.5, 127.0, 126.7, 124.6, 122.2, 111.5, 82.0, 58.0, 38.4, 28.0, 17.3. IR (neat, cm<sup>-1</sup>): 3424, 2977, 1726, 1505, 1147, 690. Anal. Calcd. for C<sub>20</sub>H<sub>24</sub>ClNO<sub>2</sub>: C, 69.45; H, 6.99, Found: C, 69.71; H, 6.96. [α]<sub>D</sub><sup>24</sup> +14.7 (*c* 1.0, CHCl<sub>3</sub>). HPLC analysis (OJ-H, 2% IPA–hexanes, 0.8 mL/min, 254 nm) indicated 88% ee: tR (minor) = 11.9 min, tR (major) = 18.0 min.

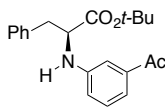

**8j**

Following the general procedure, a mixture of L-Phe-*O*t-Bu (**5a**, 221 mg, 1.00 mmol, 1.00 equiv), 3-acetylphenyl trifluoromethanesulfonate (**7j**, 268 mg, 1.00 mmol, 1 equiv), **P3** (43.0 mg, 50.0 μmol, 5.0 mol%), cesium carbonate (977 mg, 3.00 mmol, 3.00 equiv), and 2-methyltetrahydrofuran (2.00 mL) was stirred at 50 °C for 2 h. The crude product was purified by automated flash-column chromatography with a new column (eluting with 2% acetone–hexanes initially, grading to 20% acetone–hexanes, linear gradient) to afford **8j** as a yellow oil. Yield: 305 mg, 90%. <sup>1</sup>H NMR (400 MHz, CDCl<sub>3</sub>) δ 7.35–7.29 (m, 3H), 7.29–7.20 (m, 5H), 6.81 (ddd, *J* = 7.9, 2.6, 1.0 Hz, 1H), 4.43 (br s, 1H), 4.32 (t, *J* = 6.4 Hz, 1H), 3.14 (d, *J* = 6.1 Hz, 2H), 2.56 (s, 3H), 1.39 (s, 9H). <sup>13</sup>C NMR (100 MHz, CDCl<sub>3</sub>) δ 198.4, 172.1, 147.0, 138.2, 136.5, 129.5, 129.4, 128.5, 127.0, 118.6, 118.5, 112.2, 82.1, 58.0, 38.6, 28.0, 26.7. IR (neat, cm<sup>-1</sup>): 3361, 2977, 1725, 1679, 1601, 1149, 699. HRMS. Calcd. for C<sub>21</sub>H<sub>26</sub>NO<sub>3</sub>, [M+H]: 340.1907, Found: [M+H]: 340.1920 [α]<sub>D</sub><sup>24</sup> +3.1 (*c* 1.0, CHCl<sub>3</sub>). HPLC analysis (AD-H, 10% IPA–hexanes, 1.0 mL/min, 254 nm) indicated 85% ee: tR (minor) = 13.9 min, tR (major) = 20.2 min.

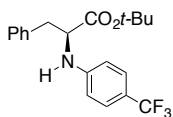

**8k**

Following the general procedure, a mixture of L-Phe-*O*-*t*-Bu (**5a**, 221 mg, 1.00 mmol, 1.00 equiv), 4-(trifluoromethyl)phenyl trifluoromethanesulfonate (**7k**, 294 mg, 1.00 mmol, 1 equiv), **P3** (43.0 mg, 50.0  $\mu$ mol, 5.0 mol%), cesium carbonate (977 mg, 3.00 mmol, 3.00 equiv), and 2-methyltetrahydrofuran (2.00 mL) was stirred at 50 °C for 2 h. The crude product was purified by automated flash-column chromatography (eluting with 2% ether–hexanes initially, grading to 20% ether–hexanes, linear gradient) to afford **8k** as a white solid. Yield: 283 mg, 77%. mp = 80–81 °C.  $^1\text{H}$  NMR (400 MHz,  $\text{CDCl}_3$ )  $\delta$  7.43 (d,  $J$  = 8.5 Hz, 2H), 7.37–7.25 (m, 3H), 7.25–7.19 (m, 2H), 6.63 (d,  $J$  = 8.5 Hz, 2H), 4.57 (br s, 1H), 4.31 (t,  $J$  = 6.2 Hz, 1H), 3.15 (dd,  $J$  = 6.2, 3.4 Hz, 2H), 1.41 (s, 9H).  $^{13}\text{C}$  NMR (100 MHz,  $\text{CDCl}_3$ )  $\delta$  171.7, 149.2, 136.3, 129.6, 128.6, 127.2, 126.8 (q,  $J$  = 3.0 Hz), 125.0 (q,  $J$  = 270.0 Hz), 119.8 (q,  $J$  = 30.0 Hz), 112.7, 82.4, 57.6, 38.5, 28.1.  $^{19}\text{F}$  NMR (375 MHz,  $\text{CDCl}_3$ ) –61.12. IR (neat,  $\text{cm}^{-1}$ ): 3382, 2988, 1708, 1616, 1317, 1104. Anal. Calcd. for  $\text{C}_{20}\text{H}_{22}\text{F}_3\text{NO}_2$ : C, 65.74; H, 6.07, Found: C, 65.89; H, 6.03.  $[\alpha]_{\text{D}}^{24}$  +16.4 ( $c$  1.0,  $\text{CHCl}_3$ ). HPLC analysis (OJ-H, 2% IPA–hexanes, 0.8 mL/min, 254 nm) indicated 55% ee: tR (minor) = 18.4 min, tR (major) = 24.4 min.

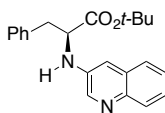

**8l**

Following the general procedure, a mixture of L-Phe-*O*-*t*-Bu (**5a**, 221 mg, 1.00 mmol, 1.00 equiv), 3-quinolinyl trifluoromethanesulfonate (**7l**, 277 mg, 1.00 mmol, 1 equiv), **P3** (43.0 mg, 50.0  $\mu$ mol, 5.0 mol%), cesium carbonate (977 mg, 3.00 mmol, 3.00 equiv), and 2-methyltetrahydrofuran (2.00 mL) was stirred at 50 °C for 2 h. The crude product was purified by automated flash-column chromatography (eluting with 12% EtOAc–hexanes initially, grading to 100% EtOAc–hexanes, linear gradient) to afford **8l** as an orange oil. Yield: 241 mg, 69%.  $^1\text{H}$  NMR (400 MHz,  $\text{CDCl}_3$ )  $\delta$  8.48 (d,  $J$  = 2.8 Hz, 1H), 8.01–7.94 (m, 1H), 7.63–7.56 (m, 1H), 7.44 (dt,  $J$  = 6.0, 3.6 Hz, 2H), 7.36–7.23 (m, 5H), 7.03 (d,  $J$  = 2.8 Hz, 1H), 4.69 (d,  $J$  = 8.3 Hz, 1H), 4.37 (dt,  $J$  = 8.3, 6.3 Hz, 1H), 3.29–3.14 (m, 2H), 1.41 (s, 9H).  $^{13}\text{C}$  NMR (100 MHz,  $\text{CDCl}_3$ )  $\delta$  171.7, 143.5, 142.4, 140.1, 136.3, 129.5, 129.3, 129.1, 128.5, 127.1, 127.0, 126.0, 125.3, 111.4, 82.4, 57.9, 38.2, 28.0. IR (neat,  $\text{cm}^{-1}$ ): 3365, 2977, 1725, 1608, 1148, 732. HRMS. Calcd. for  $\text{C}_{22}\text{H}_{25}\text{N}_2\text{O}_2$ ,  $[\text{M}+\text{H}]$ : 349.1911, Found:  $[\text{M}+\text{H}]$ : 349.1926  $[\alpha]_{\text{D}}^{24}$  +18.0 ( $c$  1.0,  $\text{CHCl}_3$ ). HPLC analysis (AD-H, 10% IPA–hexanes, 1.0 mL/min, 254 nm) indicated 97% ee: tR (minor) = 12.3 min, tR (major) = 25.7 min.

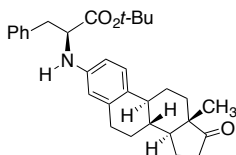

**8m**

Following the general procedure, a mixture of L-Phe-*O*-*t*-Bu (**5a**, 221 mg, 1.00 mmol, 1.00 equiv), estrone trifluoromethanesulfonate (**7m**, 402 mg, 1.00 mmol, 1 equiv), **P1** (43.0 mg, 50.0  $\mu$ mol, 5.0 mol%), cesium carbonate (977 mg, 3.00 mmol, 3.00 equiv), and 2-methyltetrahydrofuran (2.00 mL) was stirred at 50 °C for 2 h. The crude product was purified by automated flash-column chromatography (eluting with 8% ether–hexanes initially, grading to 66% ether–hexanes, linear gradient) to afford **8m** as a clear oil. Yield: 463 mg, 98%.  $^1\text{H}$  NMR (400 MHz,  $\text{CDCl}_3$ )  $\delta$

7.39–7.24 (m, 5H), 7.15–7.04 (m, 1H), 6.49 (dd,  $J = 8.4, 2.5$  Hz, 1H), 6.41 (d,  $J = 2.4$  Hz, 1H), 4.26 (app t,  $J = 6.5$  Hz, 2H), 3.13 (d,  $J = 6.4$  Hz, 2H), 2.99–2.80 (m, 2H), 2.52 (dd,  $J = 18.8, 8.8$  Hz, 1H), 2.45–2.34 (m, 1H), 2.28–1.95 (m, 5H), 1.74–1.46 (m, 6H), 1.42 (s, 9H), 0.94 (app d,  $J = 6.0$  Hz, 3H).  $^{13}\text{C}$  NMR (100 MHz,  $\text{CDCl}_3$ , \*denotes rotamer, when observed)  $\delta$  220.6, 219.9\*, 172.2, 147.4\*, 144.5, 140.2\*, 139.2\*, 137.0, 136.7, 129.4 (2C), 128.1, 127.1\*, 126.6, 126.0, 121.0\*, 120.2\*, 118.1\*, 117.0\*, 113.4, 111.4, 81.3, 58.1, 50.2, 50.1\*, 47.8, 47.6\*, 43.9\*, 43.8, 38.7, 38.3, 37.5\*, 36.5\*, 35.7, 35.6\*, 31.5, 31.3\*, 29.5, 29.2\*, 27.8, 26.5, 25.9\*, 25.8, 25.5\*, 21.4, 13.7, 13.6\*. IR (neat,  $\text{cm}^{-1}$ ): 3378, 2928, 1733, 1615, 1149, 732, 700. HRMS. Calcd. for  $\text{C}_{31}\text{H}_{40}\text{NO}_3$ ,  $[\text{M}+\text{H}]$ : 474.3003, Found:  $[\text{M}+\text{H}]$ : 474.3016  $[\alpha]_{\text{D}}^{24} +77.7$  ( $c$  1.0,  $\text{CHCl}_3$ ). The product **9m** prepared in this way was 19.6:1.0 d.r. [as determined by inverse-gated  $^{13}\text{C}$  NMR (relaxation delay = 20 s)].



## B) Preparation of Starting Materials

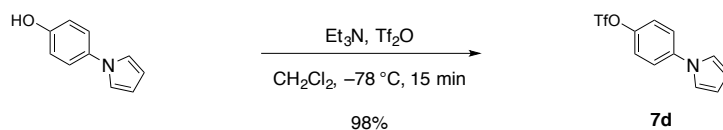

*Preparation of 4-(1H-pyrrol-1-yl)phenyl trifluoromethanesulfonate (7d)*: Triethylamine (607 mg, 6.00 mmol, 1.20 equiv) and trifluoromethanesulfonic anhydride (1.55 g, 5.50 mmol, 1.10 equiv) were added in sequence to a solution of 4-(1H-pyrrol-1-yl)phenol (796 mg, 5.00 mmol, 1 equiv) in CH<sub>2</sub>Cl<sub>2</sub> (30 mL) at –78 °C. The reaction mixture was stirred for 15 min at –78 °C. After warming to room temperature, the product mixture was transferred to a separatory funnel that had been charged with CH<sub>2</sub>Cl<sub>2</sub> (20 mL). The diluted product mixture was washed with saturated aqueous sodium bicarbonate solution (50 mL). The aqueous layer was isolated and the isolated aqueous layer was extracted with CH<sub>2</sub>Cl<sub>2</sub> (3 × 50 mL). The organic layers were combined and the combined organic layers were dried over sodium sulfate. The dried solution was filtered and the filtrate was concentrated. The residue obtained was purified by automated flash-column chromatography (eluting with 2% EtOAc–hexanes initially, grading to 20% EtOAc–hexanes, linear gradient) to afford 4-(1H-pyrrol-1-yl)phenyl trifluoromethanesulfonate (**7d**) as a white solid. Yield: 1.43g, 98%. mp = 49–51 °C. <sup>1</sup>H NMR (400 MHz, CDCl<sub>3</sub>) δ 7.48–7.42 (m, 2H), 7.39–7.33 (m, 2H), 7.09 (t, *J* = 2.2 Hz, 2H), 6.42 (t, *J* = 2.2 Hz, 2H). <sup>13</sup>C NMR (100 MHz, CDCl<sub>3</sub>) δ 146.7, 140.6, 122.7, 121.6, 119.4, 118.9 (q, *J* = 320.0 Hz), 111.5. <sup>19</sup>F NMR (375 MHz, CDCl<sub>3</sub>) δ –72.74. IR (neat, cm<sup>–1</sup>): 1515, 1426, 1207, 1133, 881, 835, 723, 605. Anal. Calcd. for C<sub>11</sub>H<sub>8</sub>F<sub>3</sub>NO<sub>3</sub>S: C, 45.36; H, 2.77, Found: C, 45.53; H, 2.86.

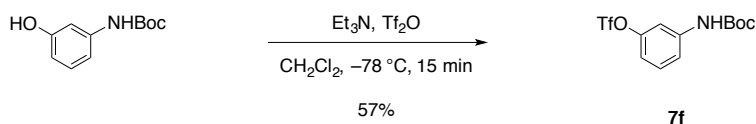

*Preparation of 3-((tert-butoxycarbonyl)amino)phenyl trifluoromethanesulfonate (7f)*: Triethylamine (607 mg, 6.00 mmol, 1.20 equiv) and trifluoromethanesulfonic anhydride (1.55 g, 5.50 mmol, 1.10 equiv) were added in sequence to a solution of *N*-Boc-3-aminophenol (1.05 g, 5.00 mmol, 1 equiv) in CH<sub>2</sub>Cl<sub>2</sub> (30 mL) at –78 °C. The reaction mixture was stirred for 15 min at –78 °C. After warming to room temperature, the product mixture was transferred to a separatory funnel that had been charged with CH<sub>2</sub>Cl<sub>2</sub> (20 mL). The diluted product mixture was washed with saturated aqueous sodium bicarbonate solution (50 mL). The aqueous layer was isolated and the isolated aqueous layer was extracted with CH<sub>2</sub>Cl<sub>2</sub> (3 × 50 mL). The organic layers were combined and the combined organic layers were dried over sodium sulfate. The dried solution was filtered and the filtrate was concentrated. The residue obtained was purified by automated flash-column chromatography (eluting with 5% EtOAc–hexanes initially, grading to 40% EtOAc–hexanes, linear gradient) to afford 3-((tert-butoxycarbonyl)amino)phenyl trifluoromethanesulfonate (**7f**) as a white solid. Yield: 1.16 g, 57%. mp = 74–76 °C. <sup>1</sup>H NMR (400 MHz, CDCl<sub>3</sub>) δ 7.57 (s, 1H), 7.32 (t, *J* = 8.2 Hz, 1H), 7.25 (d, *J* = 8.3 Hz, 1H), 7.01–6.90 (m, 2H), 1.54 (s, 9H). <sup>13</sup>C NMR (100 MHz, CDCl<sub>3</sub>) δ 152.5, 150.0, 140.6, 130.4, 118.8 (q, *J* = 320.0 Hz), 118.0, 115.3, 111.5, 81.5, 28.3. <sup>19</sup>F NMR (375 MHz, CDCl<sub>3</sub>) –73.04. IR (neat, cm<sup>–1</sup>): 3326, 2976, 1693, 1533, 1417, 1288, 1206, 1138. Anal. Calcd. for C<sub>12</sub>H<sub>14</sub>F<sub>3</sub>NO<sub>5</sub>S: C, 42.23; H, 4.13, Found: C, 42.49; H, 4.09.

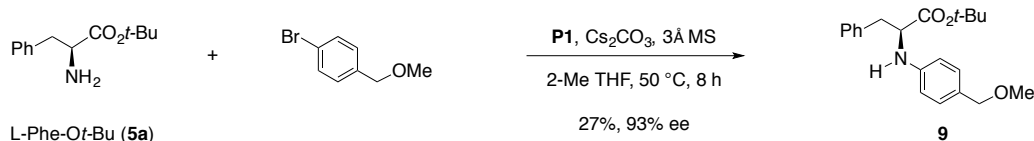

*Preparation of the N-arylation product 9:* A 25 mL screw-cap tube equipped with a stir bar and Teflon septum was charged sequentially with L-Phe-Ot-Bu, (**5a**, 443 mg, 2.00 mmol, 1.00 equiv), 1-bromo-4-(methoxymethyl)benzene, (402 mg, 2.00 mmol, 1.00 equiv), **P1** (85.4 mg, 100  $\mu\text{mol}$ , 5.0 mol%), and cesium carbonate (1.95 g, 6.00 mmol, 3.00 equiv). The reaction test tube was capped and then evacuated and backfilled with argon by piercing with a needle attached to a Schlenk line (this process was repeated a total of three times). 2-Methyltetrahydrofuran (4.00 mL) was added to the reaction test tube. The reaction test tube was placed in an oil bath that had been preheated to 50  $^\circ\text{C}$ . The reaction mixture was stirred and heated at 50  $^\circ\text{C}$  for 8 h. The reaction mixture was allowed to cool over 20 min to rt. The cooled product mixture was diluted with  $\text{CH}_2\text{Cl}_2$  (5.00 mL). The diluted product mixture was filtered through Celite and concentrated. The residue obtained was purified by automated flash-column chromatography (eluting with 8% ether–hexanes initially, grading to 66% ether–hexanes, linear gradient) to afford **9** as a yellow oil. Yield: 186 mg, 27%.  $^1\text{H NMR}$  (400 MHz,  $\text{CDCl}_3$ )  $\delta$  7.22–7.09 (m, 5H), 7.08–7.02 (m, 2H), 6.53–6.47 (m, 2H), 4.24 (s, 2H), 4.20–4.11 (m, 1H), 3.24 (s, 3H), 3.00 (d,  $J = 6.0$  Hz, 2H), 1.25 (s, 9H).  $^{13}\text{C NMR}$  (100 MHz,  $\text{CDCl}_3$ )  $\delta$  172.2, 146.3, 136.7, 129.6 (2 C), 128.4, 127.7, 126.9, 113.5, 81.8, 74.7, 58.2, 57.7, 38.6, 28.0. IR (neat,  $\text{cm}^{-1}$ ): 3365, 2977, 1726, 1615, 1521, 1367, 1149, 1088, 699. Anal. Calcd. for  $\text{C}_{21}\text{H}_{27}\text{NO}_3$ : C, 73.87; H, 7.97, Found: C, 74.04; H, 7.88.  $[\alpha]_{\text{D}}^{24} +24.4$  ( $c$  1.0,  $\text{CHCl}_3$ ). HPLC analysis (OD-H, 10% IPA–hexanes, 0.8 mL/min, 254 nm) indicated 93% ee: tR (minor) = 7.8 min, tR (major) = 10.6 min.

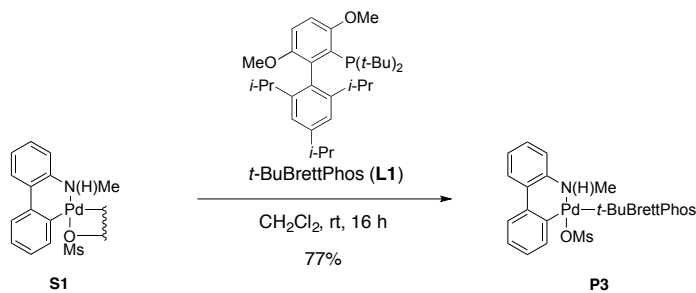

*Preparation of P3 [Prepared from a modified literature procedure]<sup>1</sup>:* A 25 mL screw-cap tube equipped with a stir bar and Teflon septum was charged sequentially with *N*-methyl-2-aminobiphenylpalladium methanesulfonate dimer (**S1**) (384 mg, 0.50 mmol, 0.50 equiv), *t*-BuBrettPhos (**L1**) (485 mg, 1.00 mmol, 1.00 equiv), and  $\text{CH}_2\text{Cl}_2$  (5.00 mL). The reaction mixture was stirred at rt for 16 h. The product mixture was concentrated, and pentane (25 mL) was added to precipitate the precatalyst, which was isolated via vacuum filtration and dried under vacuum overnight to provide **P3** as a yellow solid. Yield: 665 mg, 77%.  $^1\text{H NMR}$  (400 MHz,  $\text{CD}_3\text{OD}$ ) Complex Spectrum – See Attached.  $^{13}\text{C NMR}$  (125 MHz,  $\text{CD}_3\text{OD}$ )  $\delta$  161.48, 160.98, 159.09, 155.70, 155.69, 153.00, 152.88, 151.93, 148.77, 146.26, 143.27, 141.87, 141.85, 140.60, 137.66, 137.62, 136.22, 129.91, 129.17, 128.94, 128.75, 128.72, 127.96, 126.83, 125.93, 125.36, 124.65, 122.73, 122.56, 122.54, 121.02, 119.94, 116.59, 116.58, 113.57, 113.54, 112.79, 56.72, 55.62, 55.29, 54.70, 41.02, 41.01, 40.72, 40.59, 40.55, 40.42, 39.50, 35.82, 35.48, 34.24, 33.05, 33.00, 32.59, 32.55, 32.44, 32.31, 31.72, 29.61, 29.59, 26.51, 26.11, 25.87, 25.36, 24.83, 24.74, 24.38, 24.19, 23.51 (observed complexity due to C–P splitting).  $^{31}\text{P NMR}$  (162 MHz,  $\text{CD}_3\text{OD}$ )  $\delta$  79.03, 42.26, 41.84, 41.42, 32.61. IR (neat,  $\text{cm}^{-1}$ ): 3222, 2960, 1575, 1456, 1421, 1250, 1144, 1037, 1017, 764, 740.

### C) Reaction Optimization

**Table S1.** Summary of initial *N*-arylation experiments.

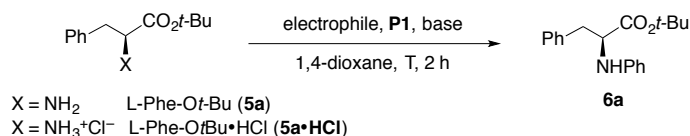

| entry          | amino acid ester | electrophile | base                            | T     | yield <sup>e</sup> | ee <sup>f</sup> |
|----------------|------------------|--------------|---------------------------------|-------|--------------------|-----------------|
| 1 <sup>a</sup> | <b>5a•HCl</b>    | PhBr         | NaOt-Bu                         | rt    | 99%                | 0%              |
| 2 <sup>a</sup> | <b>5a•HCl</b>    | PhBr         | NaOPh                           | 70 °C | 16%                | 41%             |
| 3 <sup>a</sup> | <b>5a•HCl</b>    | PhBr         | Cs <sub>2</sub> CO <sub>3</sub> | 70 °C | 0%                 | –               |
| 4 <sup>b</sup> | <b>5a</b>        | PhBr         | NaOt-Bu                         | rt    | 29%                | 0%              |
| 5 <sup>b</sup> | <b>5a</b>        | PhBr         | NaOPh                           | 70 °C | 9%                 | 72%             |
| 6 <sup>b</sup> | <b>5a</b>        | PhBr         | Cs <sub>2</sub> CO <sub>3</sub> | 70 °C | 19%                | 73%             |
| 7 <sup>c</sup> | <b>5a</b>        | PhCl         | Cs <sub>2</sub> CO <sub>3</sub> | 70 °C | 12%                | 78%             |
| 8 <sup>d</sup> | <b>5a</b>        | PhOTf        | Cs <sub>2</sub> CO <sub>3</sub> | 70 °C | 61%                | 84%             |

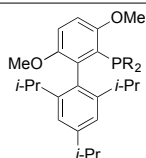

R = *t*-Bu    *t*-BuBrettPhos (**L1**)  
 R = Cy    BrettPhos (**L2**)

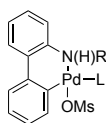

R = H, L = L1    *t*-BuBrettPhos Pd G3 (**P1**)  
 R = Me, L = L2    Brett Phos Pd G4 (**P2**)  
 R = Me, L = L1    *t*-BuBrettPhos Pd G4 (**P3**)

<sup>a</sup> Reaction Conditions: L-Phe-Ot-Bu•HCl (**5a•HCl**, 1.2 equiv), base (2.4 equiv), bromobenzene (1 equiv), **P1** (1 mol%). <sup>b</sup> Reaction Conditions: L-Phe-Ot-Bu (**5a**, 1.2 equiv), base (1.2 equiv), bromobenzene (1 equiv), **P1** (1 mol%). <sup>c</sup> Reaction Conditions: L-Phe-Ot-Bu (**5a**, 1.2 equiv), base (1.2 equiv), chlorobenzene (1 equiv), **P1** (1 mol%). <sup>d</sup> Reaction Conditions: L-Phe-Ot-Bu (**5a**, 1.2 equiv), base (1.2 equiv), phenyl trifluoromethanesulfonate (1 equiv), **P1** (1 mol%). <sup>e</sup> Isolated yields. <sup>f</sup> Enantiomeric excess (ee) was determined by HPLC analysis using chiral stationary phases.

**Procedure for entries 1–3:** A 10 mL screw-cap tube equipped with a stir bar and Teflon septum was charged sequentially with L-Phe-Ot-Bu•HCl (**5a•HCl**, 155 mg, 600 μmol, 1.20 equiv) and **P1** (4.3 mg, 5.0 μmol, 1.0 mol%). The reaction tube was transferred into a nitrogen-filled drybox. Base [sodium *tert*-butoxide (115 mg, 1.20 mol, 2.40 equiv), sodium phenoxide (139 mg, 1.20 mmol, 2.40 equiv) or cesium carbonate (391 mg, 1.20 mmol, 2.40 equiv)] was added and the reaction tube was sealed. The sealed reaction tube was removed from the drybox. The reaction test tube was evacuated and backfilled with argon by piercing with a needle attached to a Schlenk line (this process was repeated a total of three times). Bromobenzene (52.7 μL, 500 μmol, 1.00 equiv) and 1,4-dioxane (1.0 mL) were added sequentially to the reaction tube. The reaction mixture was stirred at rt for 2 h (entry 1) or stirred and heated at 70 °C for 2 h (entries 2 and 3). The reaction mixture was allowed to cool over 20 min to rt. The cooled product mixture was diluted with CH<sub>2</sub>Cl<sub>2</sub> (3.00 mL). The diluted product mixture was filtered through Celite and concentrated to dryness. The crude product was purified by automated flash-column chromatography (eluting with 2% EtOAc–hexanes initially, grading to 20% EtOAc–hexanes, linear gradient) to afford **6a** as a white solid.

**Procedure for entries 4–8:** A 10 mL screw-cap tube equipped with a stir bar and Teflon septum was charged sequentially with L-Phe-Ot-Bu (**5a**, 53.1 mg, 240 μmol, 1.20 equiv) and **P1** (1.7 mg, 2.0 μmol, 1.0 mol%). The reaction tube was transferred into a nitrogen-filled drybox. Base [sodium *tert*-butoxide (23.1 mg, 240 μmol, 1.20 equiv), sodium phenoxide (27.9 mg, 240 μmol, 1.20 equiv) or cesium carbonate (78.2 mg, 240 μmol, 1.20 equiv)] was added and the reaction tube was sealed. The sealed reaction tube was removed from the drybox. The reaction test tube

was evacuated and backfilled with argon by piercing with a needle attached to a Schlenk line (this process was repeated a total of three times). Electrophile [bromobenzene (21.1  $\mu\text{L}$ , 200  $\mu\text{mol}$ , 1.00 equiv), chlorobenzene (20.4  $\mu\text{L}$ , 200  $\mu\text{mol}$ , 1.00 equiv), or phenyl trifluoromethane sulfonate (32.4  $\mu\text{L}$ , 200  $\mu\text{mol}$ , 1.00 equiv)] and 1,4-dioxane (400  $\mu\text{L}$ ) were added sequentially to the reaction tube. The reaction mixture was stirred at rt for 2 h (entry 4) or stirred and heated at 70  $^{\circ}\text{C}$  for 2 h (entries 5–8). The reaction mixture was allowed to cool over 20 min to rt. The cooled product mixture was diluted with  $\text{CH}_2\text{Cl}_2$  (3.00 mL). The diluted product mixture was filtered through Celite and concentrated to dryness. The crude product was purified by automated flash-column chromatography (eluting with 2% EtOAc–hexanes initially, grading to 20% EtOAc–hexanes, linear gradient) to afford **6a** as a white solid.

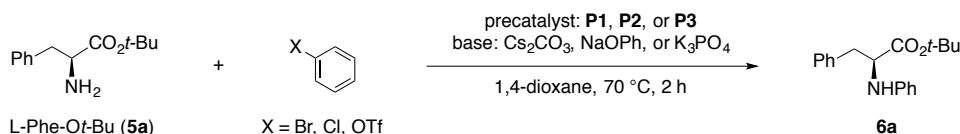

**Figure S1.** Evaluation of base, electrophile, and precatalyst.

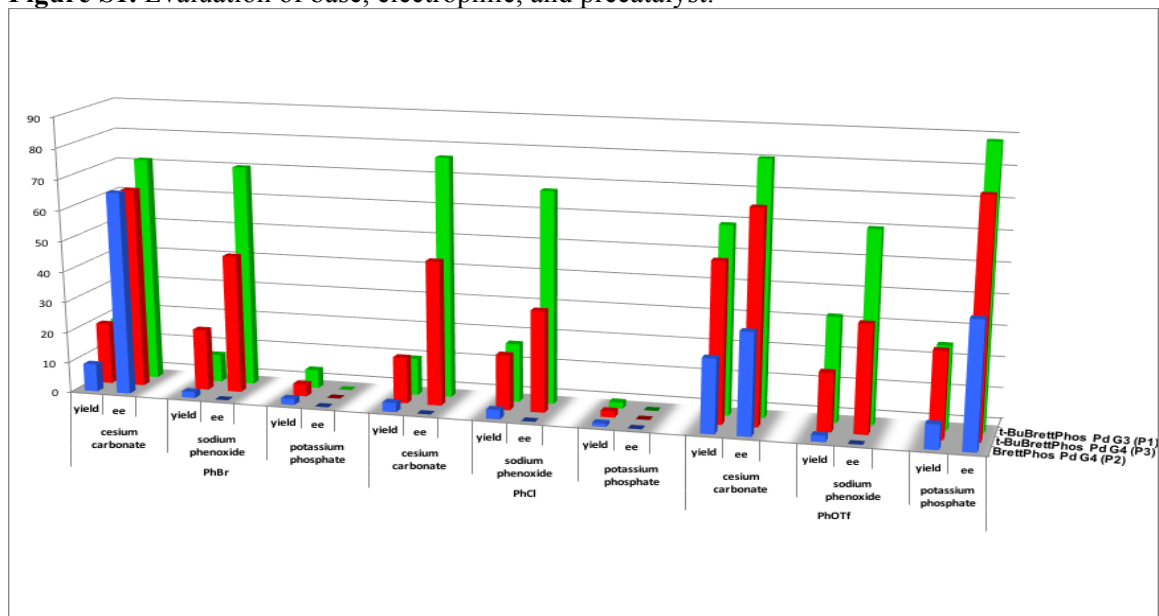

Z axis: % yield and % ee for each reaction. Y axis: Green = reactions with precatalyst **P1**. Red = reactions with precatalyst **P3**. Blue = reactions with precatalyst **P2**. X axis: electrophile and base for each reaction. Optimal combination: cesium carbonate, phenyl trifluoromethanesulfonate, and precatalyst **P1** (61% yield, 84% ee).

**Procedure for Figure S1:** A 10 mL screw-cap tube equipped with a stir bar and Teflon septum was charged sequentially with L-Phe-Ot-Bu (**5a**, 53.1 mg, 240  $\mu\text{mol}$ , 1.20 equiv) and precatalyst [**P1** (1.7 mg, 2.0  $\mu\text{mol}$ , 1.0 mol%) or **P3** (2.1 mg, 2.0  $\mu\text{mol}$ , 1.0 mol%) or **P2** (1.8 mg, 2.0  $\mu\text{mol}$ , 1.0 mol%)]. The reaction tube was transferred into a nitrogen-filled drybox. Base [cesium carbonate (78.2 mg, 240  $\mu\text{mol}$ , 1.20 equiv) or sodium phenoxide (27.9 mg, 240  $\mu\text{mol}$ , 1.20 equiv) or potassium phosphate (50.9 mg, 240  $\mu\text{mol}$ , 1.20 equiv)] was added and the reaction tube was sealed. The sealed reaction tube was removed from the drybox. The reaction test tube was evacuated and backfilled with argon by piercing with a needle attached to a Schlenk line (this process was repeated a total of three times). Electrophile [bromobenzene (21.1  $\mu\text{L}$ , 200  $\mu\text{mol}$ , 1.00 equiv) or chlorobenzene (20.4  $\mu\text{L}$ , 200  $\mu\text{mol}$ , 1.00 equiv) or phenyl trifluoromethanesulfonate (32.4  $\mu\text{L}$ , 200  $\mu\text{mol}$ , 1.00 equiv)] and 1,4-dioxane (400  $\mu\text{L}$ ) were added sequentially to the reaction tube. The reaction test tube was placed in an oil bath that had been preheated to 70  $^\circ\text{C}$ . The reaction mixture was stirred and heated at 70  $^\circ\text{C}$  for 2 h. The reaction mixture was allowed to cool over 20 min to rt. The cooled product mixture was diluted with  $\text{CH}_2\text{Cl}_2$  (3.00 mL). The diluted product mixture was filtered through Celite and concentrated to dryness. The crude product was purified by automated flash-column chromatography (eluting with 2% EtOAc–hexanes initially, grading to 20% EtOAc–hexanes, linear gradient) to afford **6a** as a white solid.

## D) Design of Experiment (DOE) Analysis

DOE analysis was carried out using JMP® Software.

**Table 2.** Summary of reaction optimization by DOE.<sup>a</sup> **A.** Initial analysis of eleven reaction variables.

**A.**

| variable                   | effect on yield                         | effect on ee                           | conclusion       |
|----------------------------|-----------------------------------------|----------------------------------------|------------------|
| ligand additive            | 0                                       | 0                                      | omit             |
| base treatment             | 0                                       | 0                                      | omit             |
| ratio <b>5a</b> : PhOTf    | 0                                       | 0                                      | 1 : 1            |
| precatalyst loading        | +                                       | 0                                      | 2 mol%           |
| time                       | 0                                       | -                                      | 2 h              |
| solvent (mL)               |                                         | 0                                      | 0.5 M            |
| solvent                    | THF, 2-Me THF                           | dioxane, 2-Me THF                      | 2-Me THF         |
| T (°C)                     | +                                       | -                                      | optimize further |
| equiv base (to <b>5a</b> ) | +                                       | -                                      | optimize further |
| 3Å MS                      | -                                       | +                                      | optimize further |
| base                       | Cs <sub>2</sub> CO <sub>3</sub> (minor) | K <sub>3</sub> PO <sub>4</sub> (minor) | optimize further |

<sup>a</sup> For categorical variables, highest yield/ee obtained with listed entry. For continuous variables: 0 = variable has no effect on yield/ee, + = highest yield/ee obtained at highest value of variable, - = highest yield/ee obtained at lowest value of variable.

### Variable Legend:

ligand additive: 0 (none added), 1 (added same mol% as the mol% precatalyst in reaction)

precatalyst loading (mol%): 1 or 5

solvent volume (mL): 1 or 5

T (°C) = 50 or 90

time (h) = 2 or 12

3 Å MS: 0 (none added) or 1 (50 mg added)

base: K<sub>3</sub>PO<sub>4</sub> or Cs<sub>2</sub>CO<sub>3</sub>

base treatment: no treatment or finely ground

ratio **5a** to phenyl trifluoromethanesulfonate: 0.83 or 1.2

equiv base (to **5a**): 1 or 3

solvent: 1,4-dioxane, 2-methyltetrahydrofuran, or THF

**Table S2:** Reactions run in initial DOE analysis.

| Pattern | ligand additive (mol%) | catalyst loading (mol%) | volume (mL) | T (C) | time (h) | 3A MS (mg) | base   | base treatment | ratio AA : PhOTf (to AA) | equiv base (to AA) | solvent | Yield | ee |
|---------|------------------------|-------------------------|-------------|-------|----------|------------|--------|----------------|--------------------------|--------------------|---------|-------|----|
| -----O  | 0                      | 1                       | 1           | 50    | 2        | 0          | K3PO4  | bottle         | 0.83                     | 1                  | dioxane | 40    | 97 |
| -----O  | 0                      | 1                       | 1           | 50    | 2        | 0          | K3PO4  | bottle         | 0.83                     | 1                  | THF     | 17    | 97 |
| -----O  | 0                      | 1                       | 1           | 50    | 2        | 0          | K3PO4  | bottle         | 0.83                     | 1                  | 2-MeTHF | 42    | 96 |
| +++++O  | 1                      | 5                       | 5           | 50    | 12       | 1          | K3PO4  | finely ground  | 0.83                     | 1                  | dioxane | 23    | 88 |
| +++++O  | 0                      | 5                       | 5           | 50    | 12       | 0          | K3PO4  | bottle         | 1.2                      | 3                  | dioxane | 82    | 66 |
| +++++O  | 0                      | 5                       | 5           | 50    | 12       | 0          | K3PO4  | bottle         | 1.2                      | 3                  | THF     | 51    | 79 |
| +++++O  | 1                      | 5                       | 5           | 50    | 12       | 1          | K3PO4  | finely ground  | 0.83                     | 1                  | THF     | 39    | 79 |
| +++++O  | 1                      | 5                       | 5           | 50    | 12       | 1          | K3PO4  | finely ground  | 0.83                     | 1                  | 2-MeTHF | 25    | 92 |
| +++++O  | 0                      | 5                       | 5           | 50    | 12       | 0          | K3PO4  | bottle         | 1.2                      | 3                  | 2-MeTHF | 61    | 81 |
| +++++O  | 1                      | 1                       | 5           | 50    | 2        | 0          | Cs2CO3 | finely ground  | 1.2                      | 1                  | dioxane | 23    | 98 |
| +++++O  | 0                      | 5                       | 1           | 50    | 2        | 1          | Cs2CO3 | finely ground  | 0.83                     | 3                  | dioxane | 30    | 98 |
| +++++O  | 0                      | 5                       | 1           | 50    | 2        | 1          | Cs2CO3 | finely ground  | 0.83                     | 3                  | THF     | 85    | 87 |
| +++++O  | 1                      | 1                       | 5           | 50    | 2        | 0          | Cs2CO3 | finely ground  | 1.2                      | 1                  | THF     | 34    | 99 |
| +++++O  | 1                      | 1                       | 5           | 50    | 2        | 0          | Cs2CO3 | finely ground  | 1.2                      | 1                  | 2-MeTHF | 17    | 98 |
| +++++O  | 0                      | 5                       | 1           | 50    | 2        | 1          | Cs2CO3 | finely ground  | 0.83                     | 3                  | 2-MeTHF | 88    | 89 |
| +++++O  | 1                      | 1                       | 1           | 50    | 12       | 1          | Cs2CO3 | bottle         | 1.2                      | 3                  | dioxane | 16    | 89 |
| +++++O  | 1                      | 1                       | 1           | 50    | 12       | 1          | Cs2CO3 | bottle         | 1.2                      | 3                  | THF     | 59    | 41 |
| +++++O  | 1                      | 1                       | 1           | 50    | 12       | 1          | Cs2CO3 | bottle         | 1.2                      | 3                  | 2-MeTHF | 26    | 62 |
| +++++O  | 1                      | 5                       | 1           | 90    | 2        | 0          | K3PO4  | finely ground  | 1.2                      | 3                  | dioxane | 79    | 56 |
| +++++O  | 1                      | 1                       | 5           | 90    | 2        | 1          | K3PO4  | bottle         | 0.83                     | 3                  | dioxane | 28    | 70 |
| +++++O  | 1                      | 1                       | 5           | 90    | 2        | 1          | K3PO4  | bottle         | 0.83                     | 3                  | THF     | 26    | 67 |
| +++++O  | 1                      | 5                       | 1           | 90    | 2        | 0          | K3PO4  | finely ground  | 1.2                      | 3                  | THF     | 78    | 45 |
| +++++O  | 1                      | 5                       | 1           | 90    | 2        | 0          | K3PO4  | finely ground  | 1.2                      | 3                  | 2-MeTHF | 83    | 59 |
| +++++O  | 1                      | 1                       | 5           | 90    | 2        | 1          | K3PO4  | bottle         | 0.83                     | 3                  | 2-MeTHF | 26    | 70 |
| +++++O  | 0                      | 1                       | 1           | 90    | 12       | 1          | K3PO4  | finely ground  | 1.2                      | 1                  | dioxane | 14    | 52 |
| +++++O  | 0                      | 1                       | 1           | 90    | 12       | 1          | K3PO4  | finely ground  | 1.2                      | 1                  | THF     | 31    | 51 |
| +++++O  | 0                      | 1                       | 1           | 90    | 12       | 1          | K3PO4  | finely ground  | 1.2                      | 1                  | 2-MeTHF | 28    | 39 |
| +++++O  | 0                      | 5                       | 5           | 90    | 2        | 1          | Cs2CO3 | bottle         | 1.2                      | 1                  | dioxane | 51    | 74 |
| +++++O  | 0                      | 5                       | 5           | 90    | 2        | 1          | Cs2CO3 | bottle         | 1.2                      | 1                  | THF     | 41    | 85 |
| +++++O  | 0                      | 5                       | 5           | 90    | 2        | 1          | Cs2CO3 | bottle         | 1.2                      | 1                  | 2-MeTHF | 37    | 86 |
| +++++O  | 1                      | 5                       | 1           | 90    | 12       | 0          | Cs2CO3 | bottle         | 0.83                     | 1                  | dioxane | 81    | 32 |
| +++++O  | 0                      | 1                       | 5           | 90    | 12       | 0          | Cs2CO3 | finely ground  | 0.83                     | 3                  | dioxane | 54    | 4  |
| +++++O  | 1                      | 5                       | 1           | 90    | 12       | 0          | Cs2CO3 | bottle         | 0.83                     | 1                  | THF     | 83    | 1  |
| +++++O  | 0                      | 1                       | 5           | 90    | 12       | 0          | Cs2CO3 | finely ground  | 0.83                     | 3                  | THF     | 53    | 0  |
| +++++O  | 1                      | 5                       | 1           | 90    | 12       | 0          | Cs2CO3 | bottle         | 0.83                     | 1                  | 2-MeTHF | 80    | 61 |
| +++++O  | 0                      | 1                       | 5           | 90    | 12       | 0          | Cs2CO3 | finely ground  | 0.83                     | 3                  | 2-MeTHF | 67    | 4  |

Figure S2: Statistical analysis of 11 reaction variables.

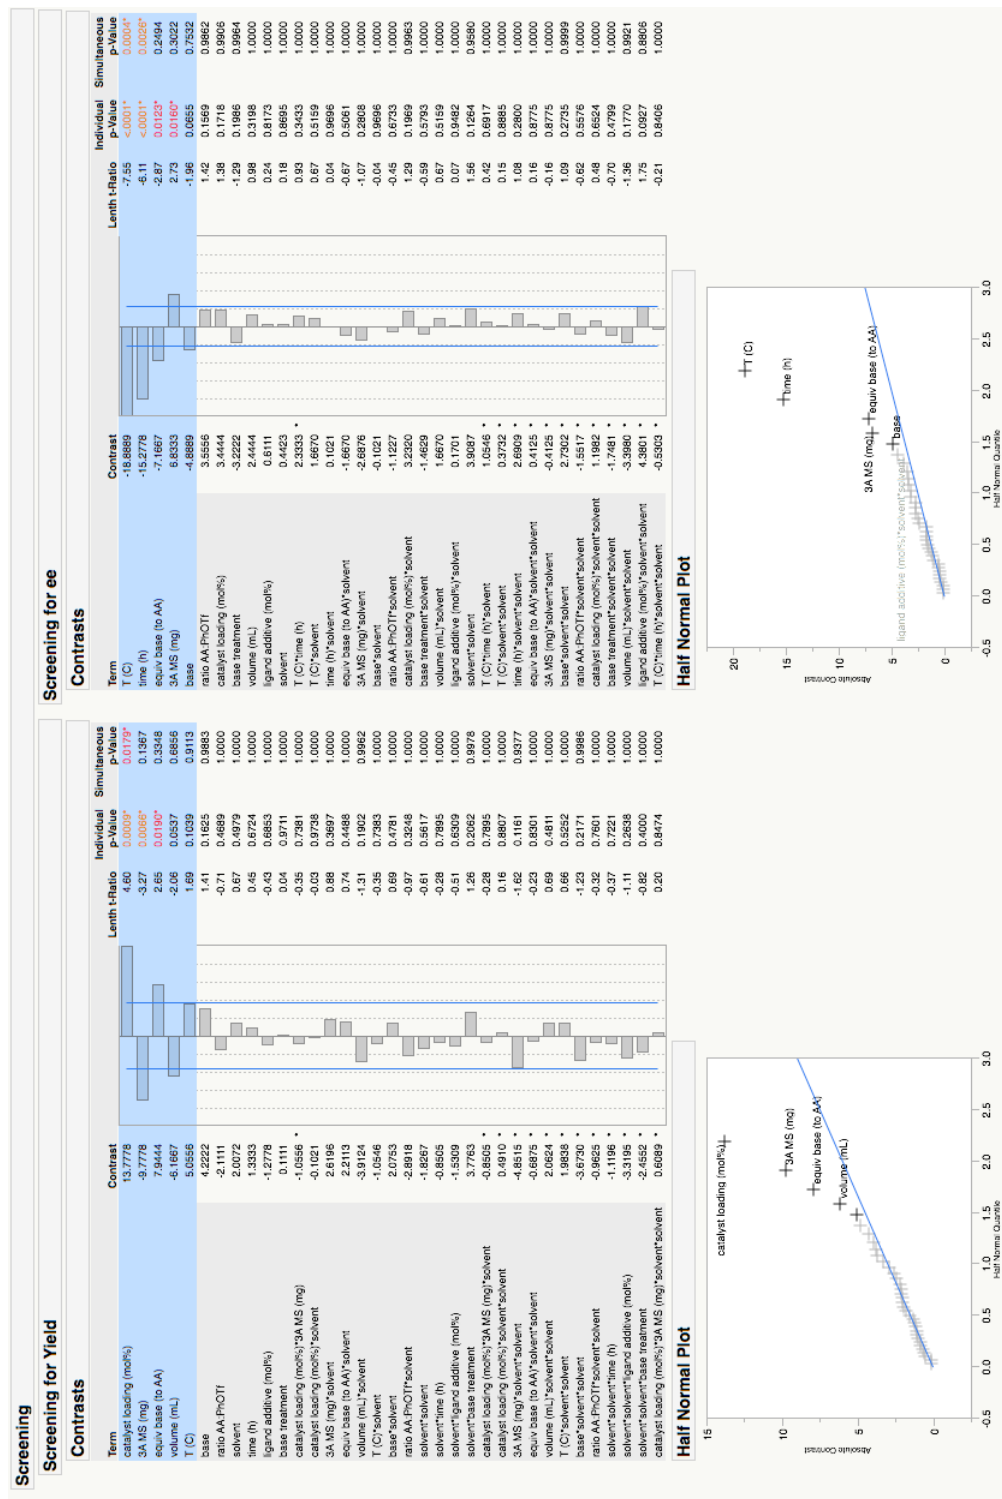



**Table 2.** Summary of reaction optimization by DOE.<sup>a</sup> **B.** Subsequent analysis of four reaction variables.

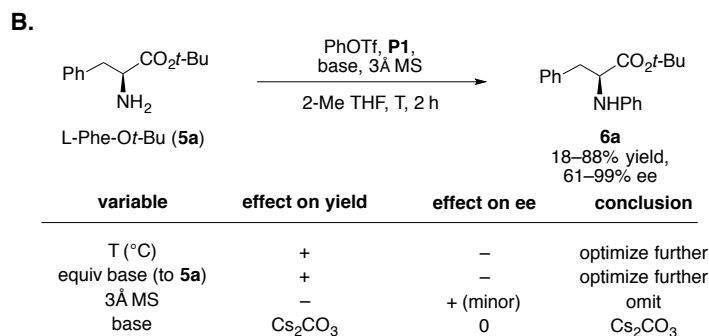

<sup>a</sup> For categorical variables, highest yield/ee obtained with listed entry. For continuous variables: 0 = variable has no effect on yield/ee, + = highest yield/ee obtained at highest value of variable, – = highest yield/ee obtained at lowest value of variable.

Variable Legend:

T (°C) = 50, 60, or 70

equiv base (to **5a**): 1 or 3

3 Å MS (mg): 0 or 50

base: K<sub>3</sub>PO<sub>4</sub> or Cs<sub>2</sub>CO<sub>3</sub>

**Table S3.** Subset of reactions from subsequent DOE analysis.

| entry | T     | base                            | equiv base      |        | yield | ee  | 2 mol% precatalyst |     | 5 mol% precatalyst |    |
|-------|-------|---------------------------------|-----------------|--------|-------|-----|--------------------|-----|--------------------|----|
|       |       |                                 | (to <b>5a</b> ) | 3 Å MS |       |     | yield              | ee  | yield              | ee |
| 1     | 50 °C | Cs <sub>2</sub> CO <sub>3</sub> | 1               | 0 mg   | 64%   | 91% | 89%                | 94% |                    |    |
| 2     | 50 °C | Cs <sub>2</sub> CO <sub>3</sub> | 1               | 50 mg  | 51%   | 95% | 80%                | 92% |                    |    |
| 3     | 50 °C | Cs <sub>2</sub> CO <sub>3</sub> | 3               | 0 mg   | 69%   | 89% | 93%                | 91% |                    |    |
| 4     | 50 °C | Cs <sub>2</sub> CO <sub>3</sub> | 3               | 50 mg  | 69%   | 92% | 95%                | 94% |                    |    |

Yellow indicates optimized reaction conditions.

**Table S4:** Reactions run in subsequent DOE analysis.

| Pattern | T (C) | eq base (to AA) | 3A MS | base   | yield | ee |
|---------|-------|-----------------|-------|--------|-------|----|
| ----    | 50    | 3               | 50    | K3PO4  | 18    | 97 |
| ---+    | 50    | 1               | 50    | Cs2CO3 | 51    | 95 |
| ---+    | 50    | 1               | 0     | K3PO4  | 27    | 93 |
| ---+    | 50    | 3               | 50    | Cs2CO3 | 69    | 92 |
| ---+    | 50    | 1               | 50    | K3PO4  | 7     | 99 |
| ---+    | 50    | 3               | 0     | Cs2CO3 | 69    | 89 |
| ---+    | 50    | 3               | 0     | K3PO4  | 55    | 89 |
| ----    | 50    | 1               | 0     | Cs2CO3 | 64    | 91 |
| 000-    | 60    | 2               | 25    | Cs2CO3 | 71    | 86 |
| 000+    | 60    | 2               | 25    | K3PO4  | 41    | 90 |
| 000-    | 60    | 2               | 25    | Cs2CO3 | 84    | 87 |
| ++++    | 70    | 3               | 50    | K3PO4  | 60    | 67 |
| ++++    | 70    | 1               | 0     | K3PO4  | 51    | 81 |
| ++++    | 70    | 3               | 50    | Cs2CO3 | 77    | 75 |
| ++++    | 70    | 1               | 50    | Cs2CO3 | 51    | 86 |
| ++++    | 70    | 3               | 0     | Cs2CO3 | 88    | 74 |
| ++++    | 70    | 1               | 0     | Cs2CO3 | 72    | 69 |
| ++++    | 70    | 3               | 0     | K3PO4  | 78    | 61 |
| ++++    | 70    | 1               | 50    | K3PO4  | 30    | 90 |

Figure S3: Statistical analysis of four reaction variables.

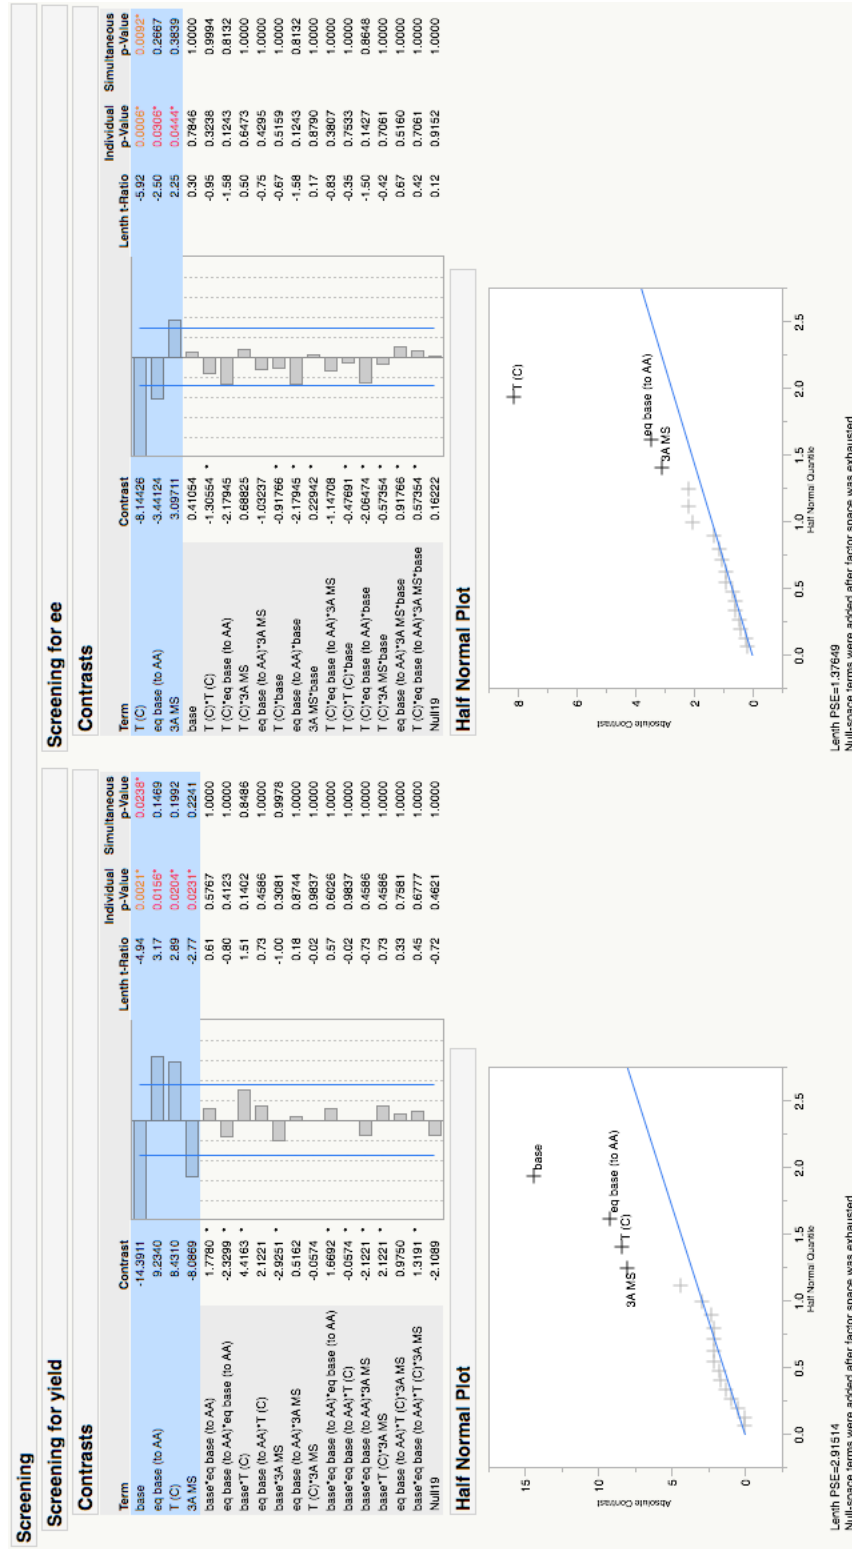

E) Experiments to Determine Mechanism of Racemization

A.

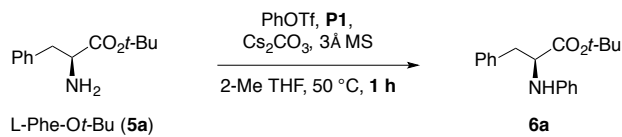

|           | ee before reaction | ee after reaction <sup>a</sup> |
|-----------|--------------------|--------------------------------|
| <b>5a</b> | 99%                | 81%                            |
| <b>6a</b> | –                  | 97%                            |

<sup>a</sup> Enantiomeric excess (ee) was determined directly from the crude reaction mixture by HPLC analysis using chiral stationary phases.

**Scheme 3. A.** Experiment determining the enantiomeric excess before and after the reaction.

**Procedure for Scheme 3A:** A 10 mL screw-cap tube equipped with a stir bar and Teflon septum was charged sequentially with L-Phe-Ot-Bu (**5a**, 111 mg, 500  $\mu\text{mol}$ , 1.00 equiv), **P1** (21.4 mg, 30.0  $\mu\text{mol}$ , 5.0 mol%), and activated 3  $\text{\AA}$  MS (50.0 mg). The reaction tube was transferred into a nitrogen-filled drybox. Cesium carbonate (489 mg, 1.50 mmol, 3.00 equiv) was added and the reaction tube was sealed. The sealed reaction tube was removed from the drybox. The reaction test tube was evacuated and backfilled with argon by piercing with a needle attached to a Schlenk line (this process was repeated a total of three times). Phenyl trifluoromethanesulfonate (81.0  $\mu\text{L}$ , 500  $\mu\text{mol}$ , 1.00 equiv) and 2-methyltetrahydrofuran (1.00 mL) were added sequentially to the reaction tube. The reaction test tube was placed in an oil bath that had been preheated to 50  $^\circ\text{C}$ . The reaction mixture was stirred and heated at 50  $^\circ\text{C}$  for 1 h. The reaction mixture was allowed to cool over 20 min to rt. The cooled product mixture was diluted with  $\text{CH}_2\text{Cl}_2$  (5.00 mL). The diluted product mixture was filtered through Celite and concentrated to dryness. The crude product mixture was analyzed by HPLC. The crude product mixture was then purified by automated flash-column chromatography (eluting with 8% ether–hexanes initially, grading to 100% ether–hexanes, linear gradient, followed by elution with 1% MeOH–ether, grading to 10% MeOH–ether, linear gradient) to afford **6a** as a white solid. Yield: 116 mg, 78%.

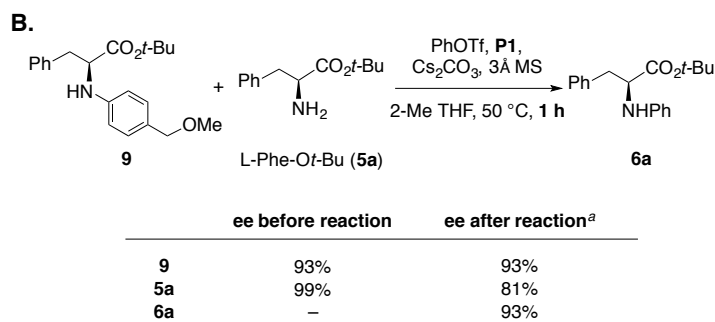

<sup>a</sup> Enantiomeric excess (ee) was determined after purification by silica gel chromatography.

**Scheme 3. B.** Experiment to test for product racemization with exogenous and different product added.

**Procedure for Scheme 3B:** A 10 mL screw-cap tube equipped with a stir bar and Teflon septum was charged sequentially with the *N*-arylation product **9**, (85.4 mg, 250  $\mu\text{mol}$ , 1.00 equiv), L-Phe-*Ot*-Bu (**5a**, 55.3 mg, 250  $\mu\text{mol}$ , 1.00 equiv), **P1** (10.7 mg, 10.0  $\mu\text{mol}$ , 5.0 mol%), and activated 3 $\text{\AA}$  MS (25.0 mg). The reaction tube was transferred into a nitrogen-filled drybox. Cesium carbonate (244 mg, 750  $\mu\text{mol}$ , 3.00 equiv) was added and the reaction tube was sealed. The sealed reaction tube was removed from the drybox. The reaction test tube was evacuated and backfilled with argon by piercing with a needle attached to a Schlenk line (this process was repeated a total of three times). Phenyl trifluoromethanesulfonate (40.5  $\mu\text{L}$ , 250  $\mu\text{mol}$ , 1.00 equiv) and 2-methyltetrahydrofuran (1.00 mL) were added sequentially to the reaction tube. The reaction test tube was placed in an oil bath that had been preheated to 50  $^\circ\text{C}$ . The reaction mixture was stirred and heated at 50  $^\circ\text{C}$  for 1 h. The reaction mixture was allowed to cool over 20 min to rt. The cooled product mixture was diluted with  $\text{CH}_2\text{Cl}_2$  (5.00 mL). The diluted product mixture was filtered through Celite and concentrated to dryness. The residue obtained was purified by automated flash-column chromatography (eluting with 8% ether–hexanes initially, grading to 100% ether–hexanes, linear gradient, followed by elution with 1% MeOH:ether, grading to 10% MeOH–ether, linear gradient) to afford **9** as a yellow oil (85.3 mg, 99% recovered), L-Phe-*Ot*-Bu (**5a**) as a yellow oil (19.7 mg, 36% recovered), and **6a** as a white solid (43.1 mg, 58%).

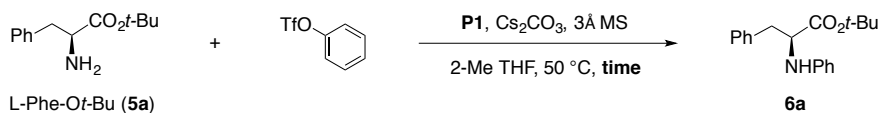

**Table S5.** Evaluation of yield and ee over reaction time.

| entry | time   | yield | ee  |
|-------|--------|-------|-----|
| 1     | 30 min | 67%   | 98% |
| 2     | 1 h    | 73%   | 97% |
| 3     | 1.5 h  | 90%   | 95% |
| 4     | 2 h    | 92%   | 95% |
| 5     | 4 h    | 96%   | 93% |
| 6     | 16 h   | 99%   | 88% |
| 7     | 10 d   | 91%   | 10% |

**Procedure for Table S5:** A 10 mL screw-cap tube equipped with a stir bar and Teflon septum was charged sequentially with L-Phe-Or-Bu (**5a**, 111 mg, 500  $\mu\text{mol}$ , 1.00 equiv), **P1** (21.4 mg, 30.0  $\mu\text{mol}$ , 5.0 mol%), and activated 3 $\text{\AA}$  MS (50.0 mg). The reaction tube was transferred into a nitrogen-filled drybox. Cesium carbonate (489 mg, 1.50 mmol, 3.00 equiv) was added and the reaction tube was sealed. The sealed reaction tube was removed from the drybox. The reaction test tube was evacuated and backfilled with argon by piercing with a needle attached to a Schlenk line (this process was repeated a total of three times). Phenyl trifluoromethanesulfonate (81.0  $\mu\text{L}$ , 500  $\mu\text{mol}$ , 1.00 equiv) and 2-methyltetrahydrofuran (1.00 mL) were added sequentially to the reaction tube. The reaction test tube was placed in an oil bath that had been preheated to 50  $^\circ\text{C}$ . The reaction mixture was stirred and heated at 50  $^\circ\text{C}$  for the indicated time. The reaction mixture was allowed to cool over 20 min to rt. The cooled product mixture was diluted with  $\text{CH}_2\text{Cl}_2$  (5.00 mL). The diluted product mixture was filtered through Celite and concentrated to dryness. The crude product was purified by automated flash-column chromatography (eluting with 2% EtOAc–hexanes initially, grading to 20% EtOAc–hexanes, linear gradient) to afford **6a** as a white solid.

### III. Catalog of Spectra

A) Catalog of NMR Spectra

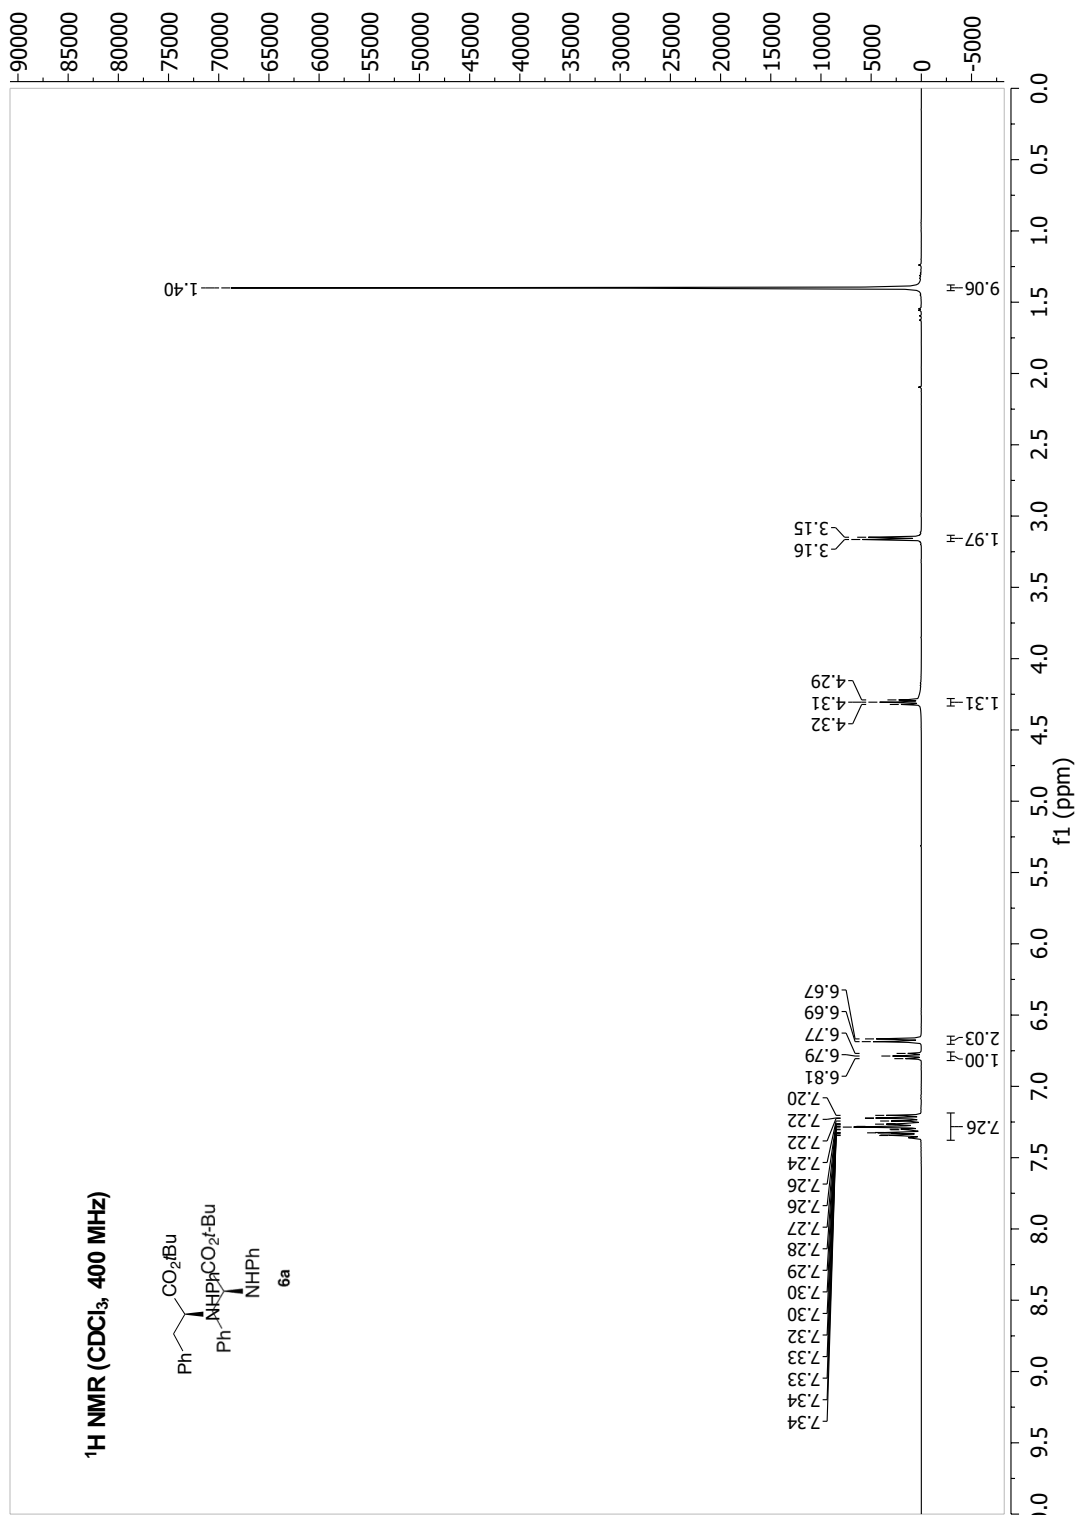

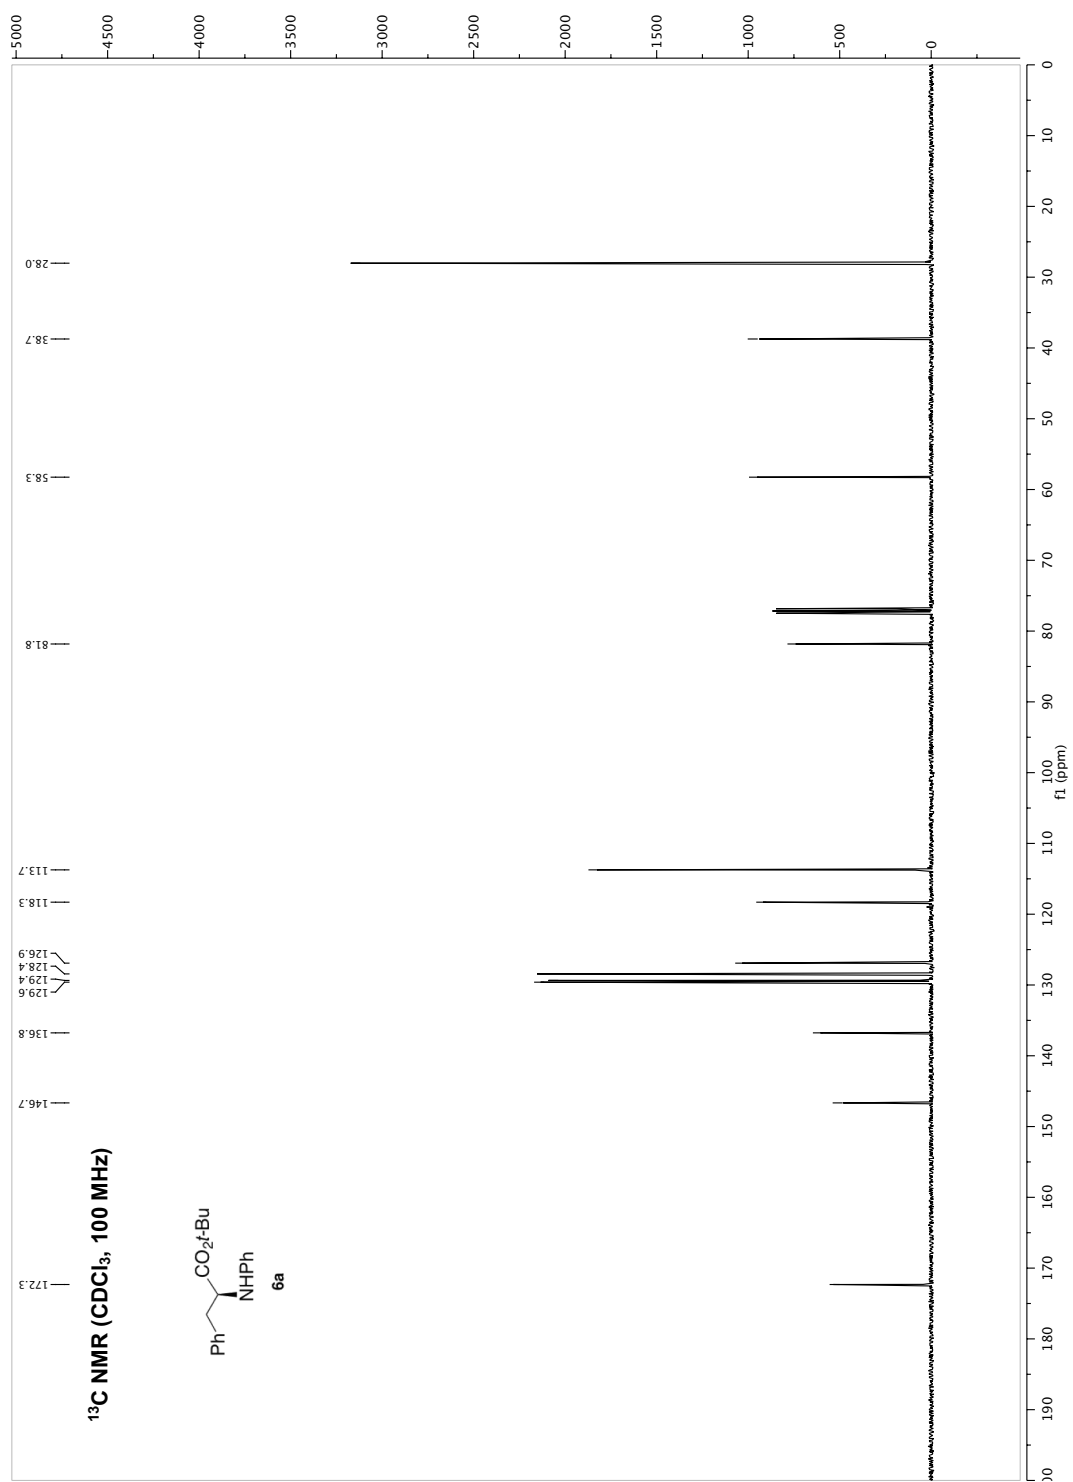



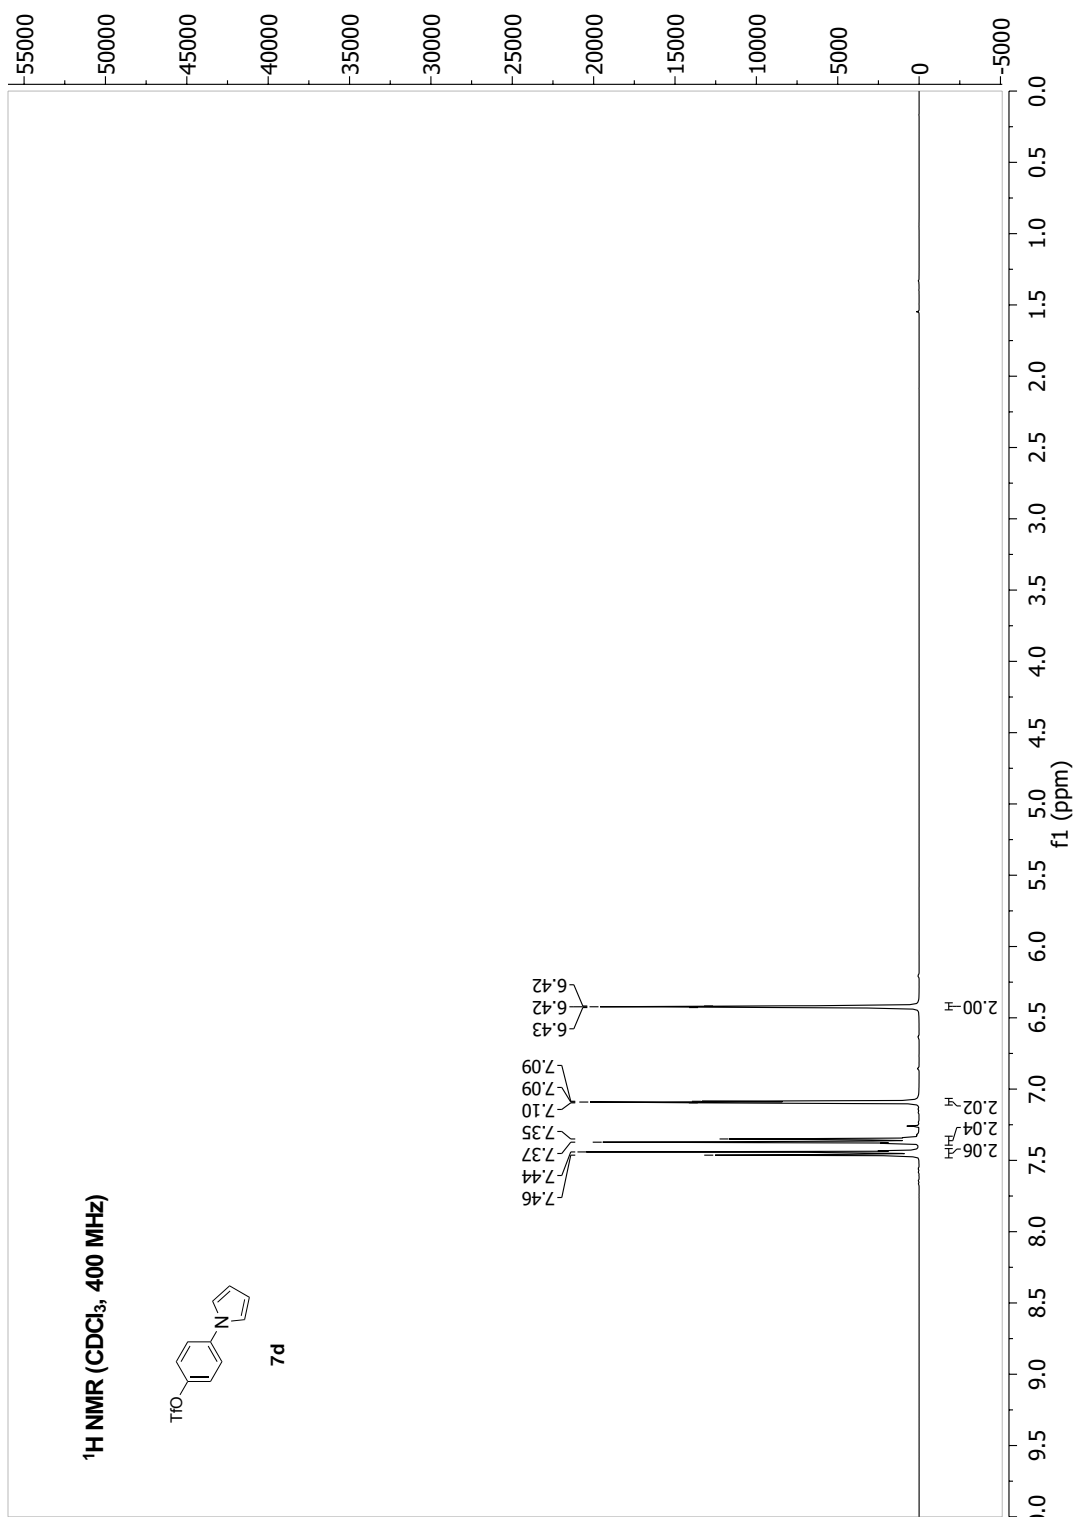

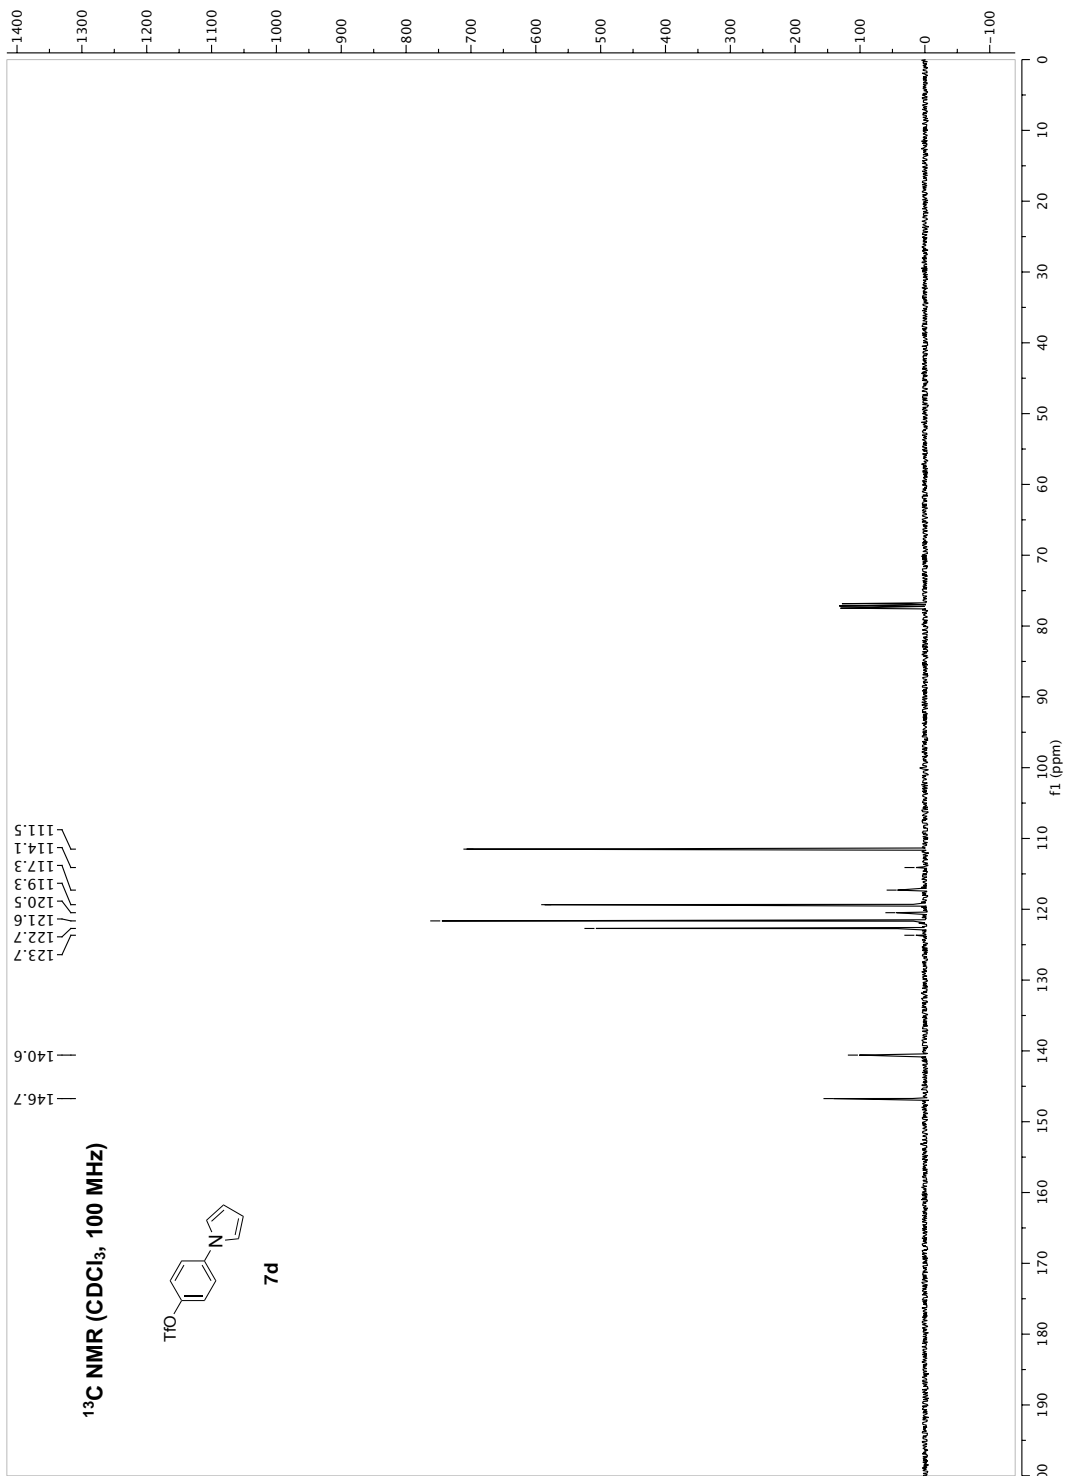

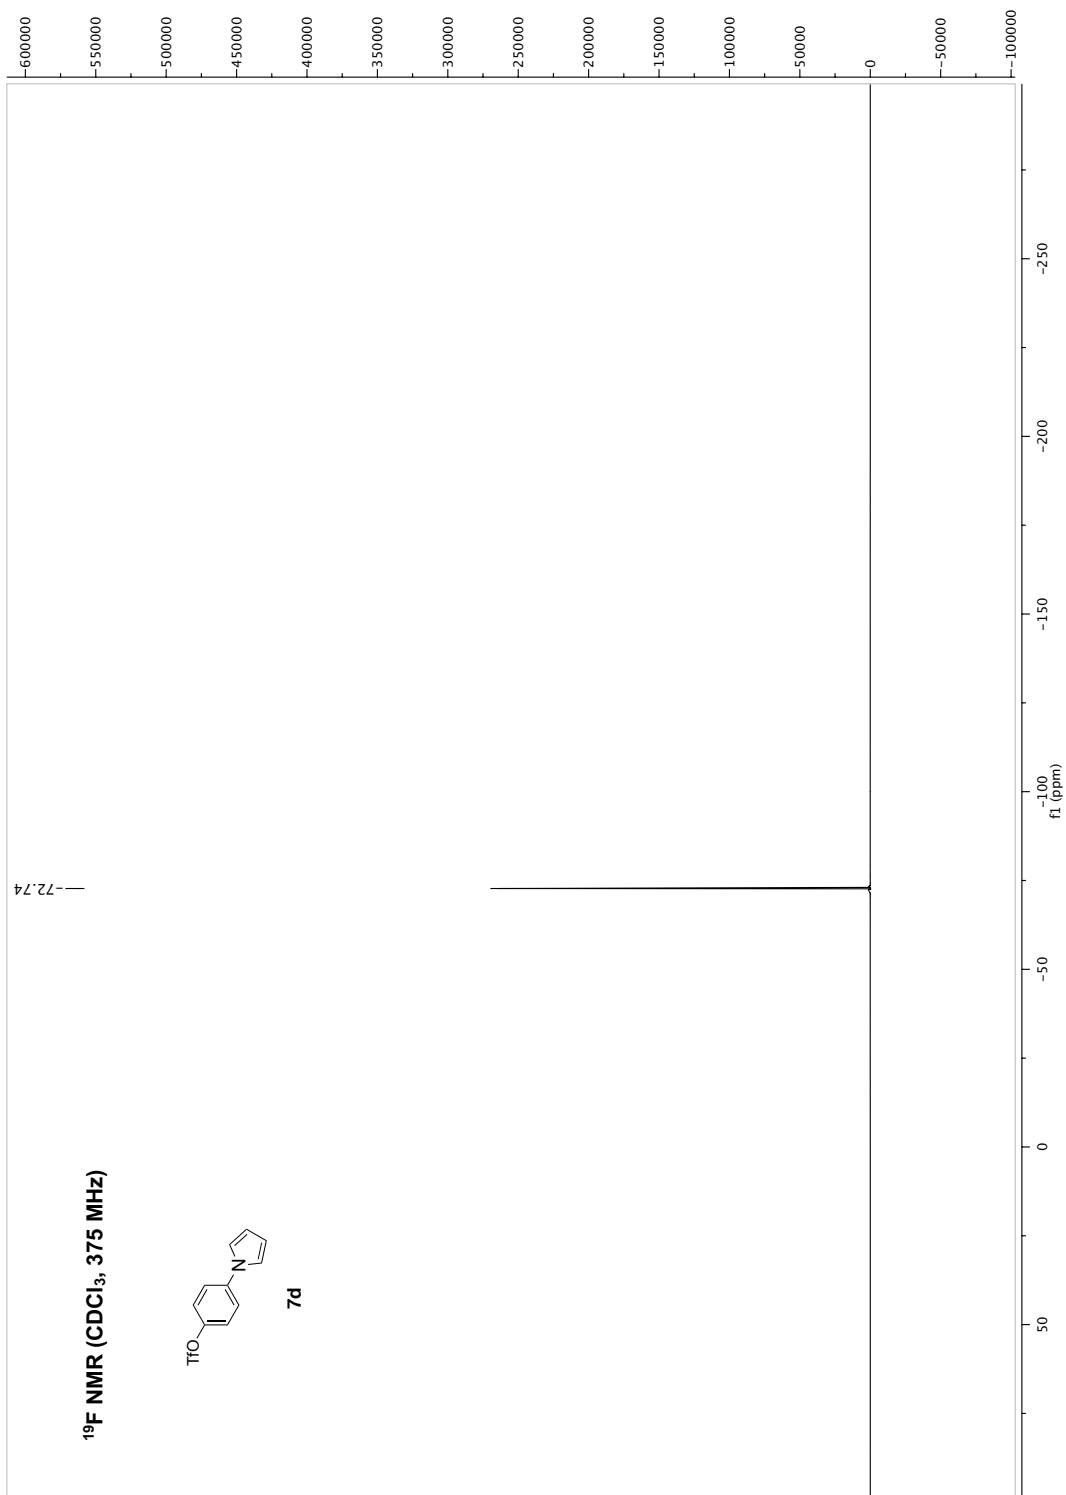

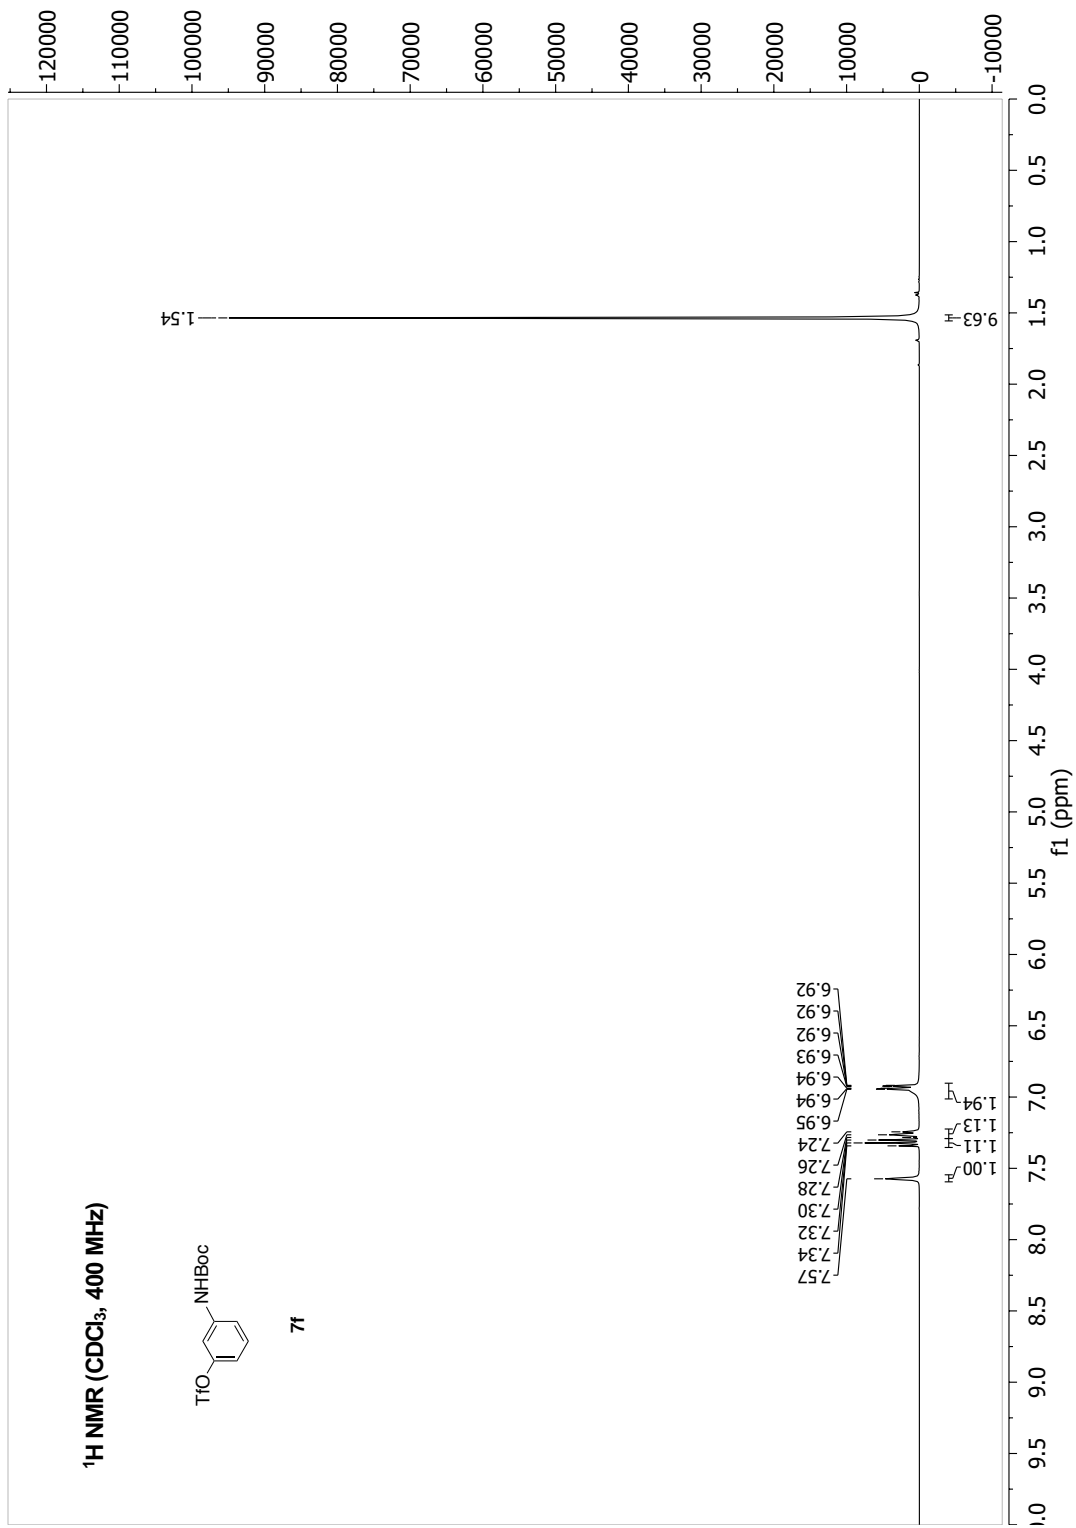

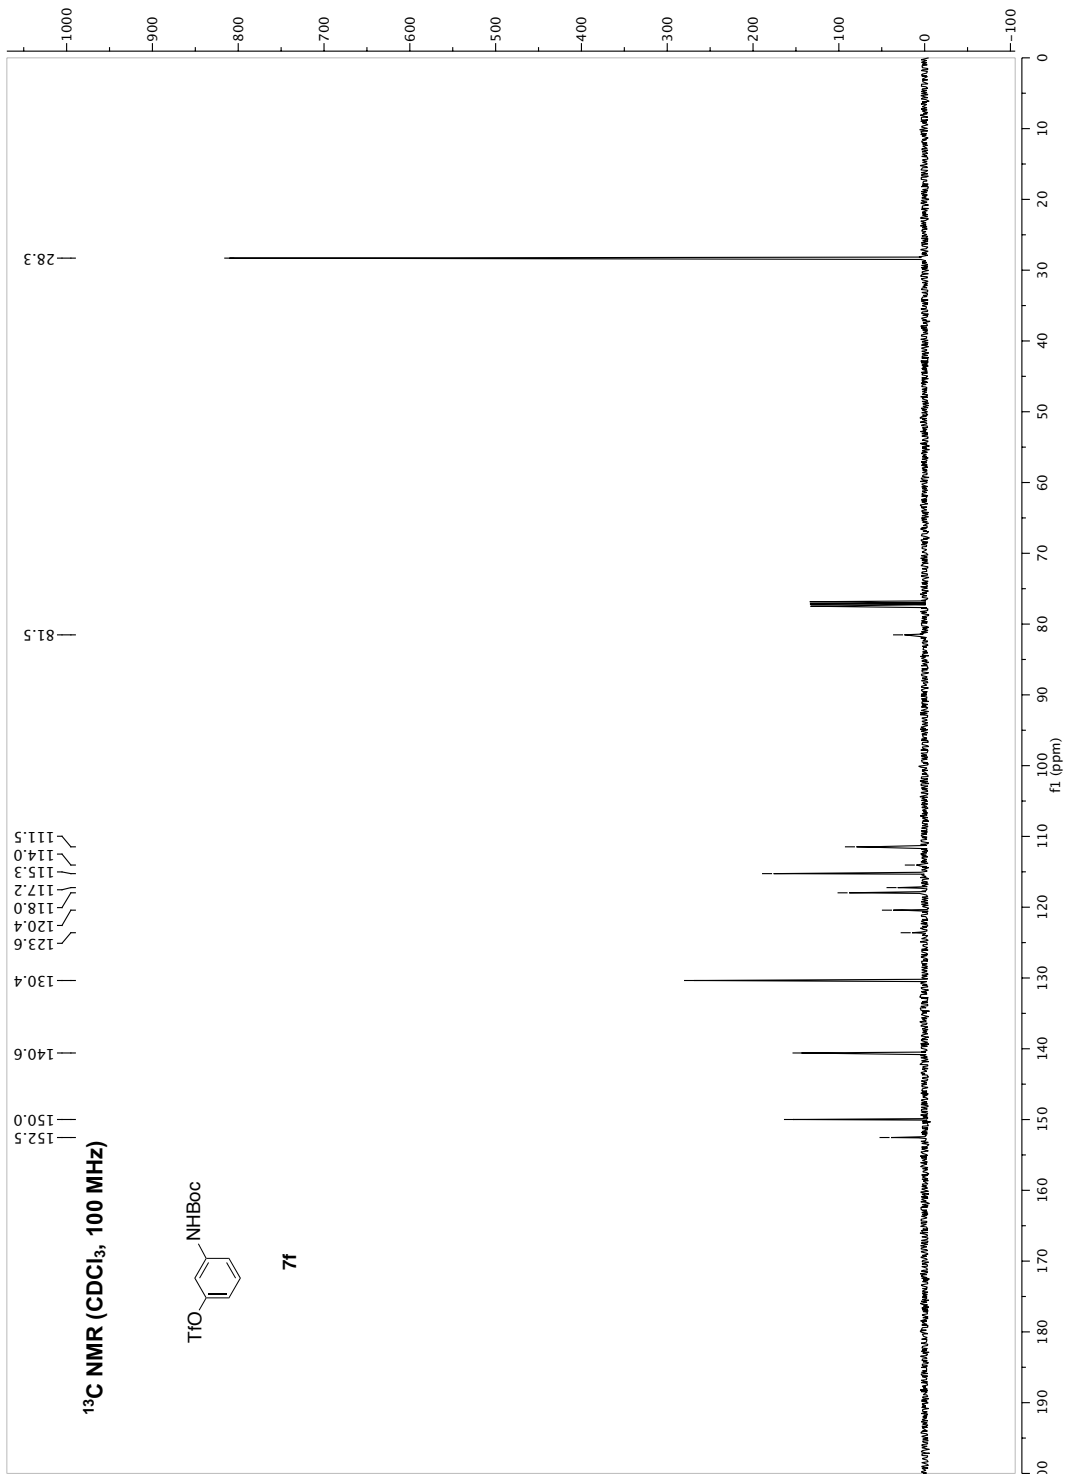

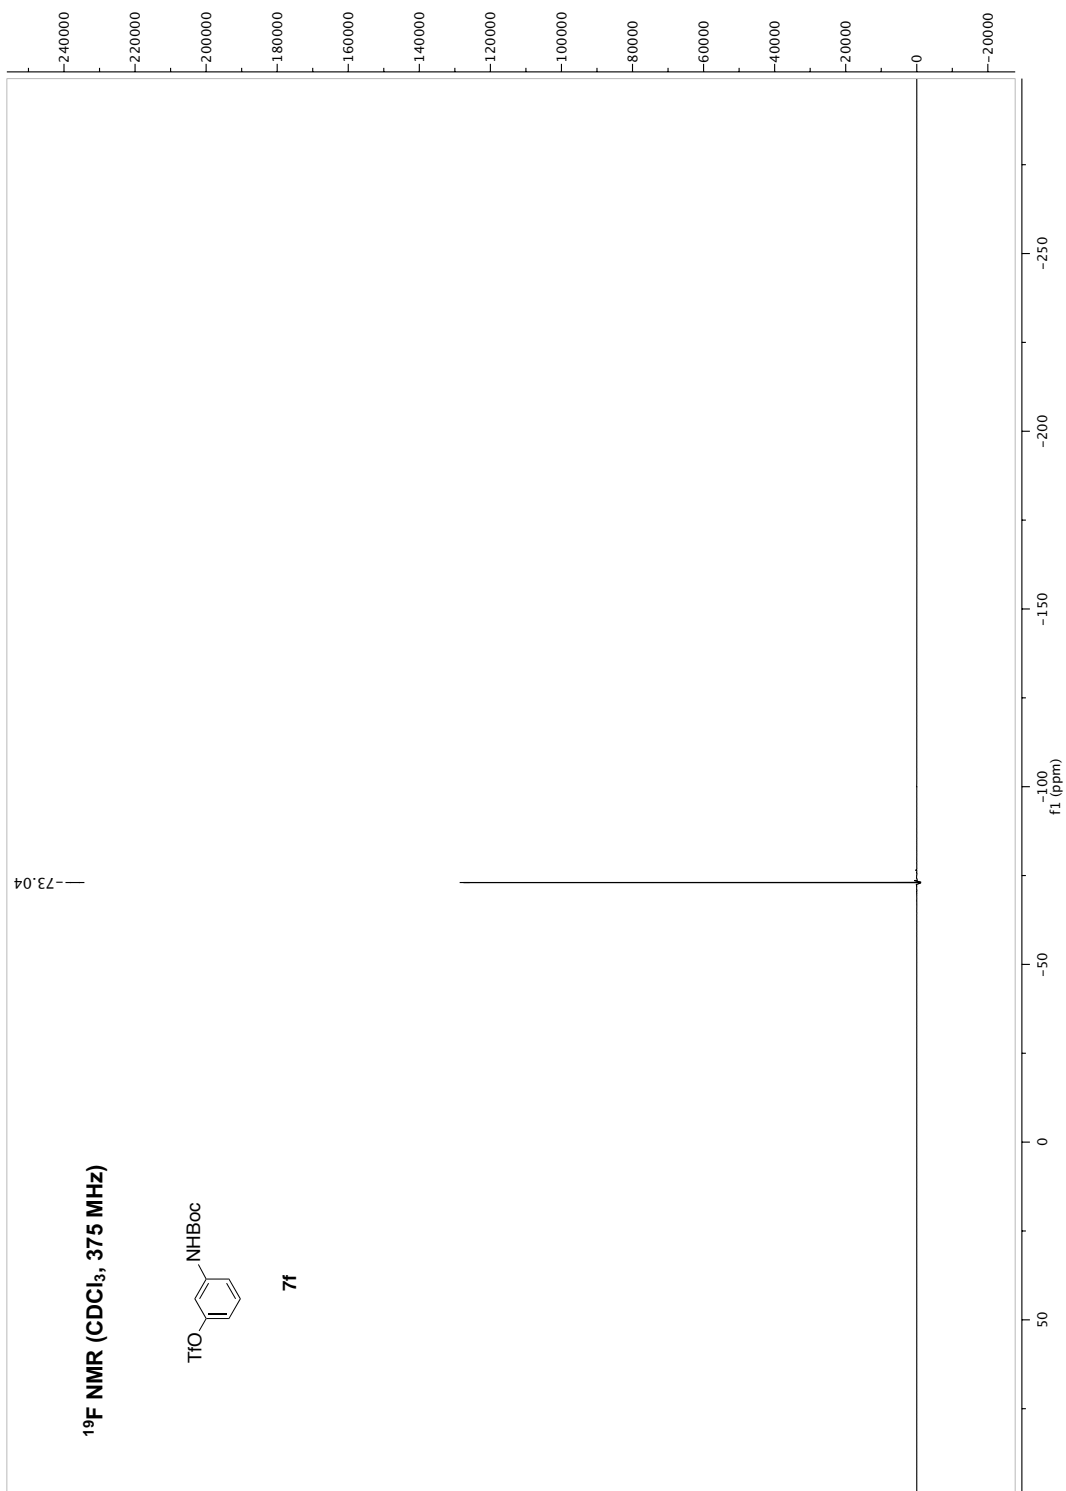

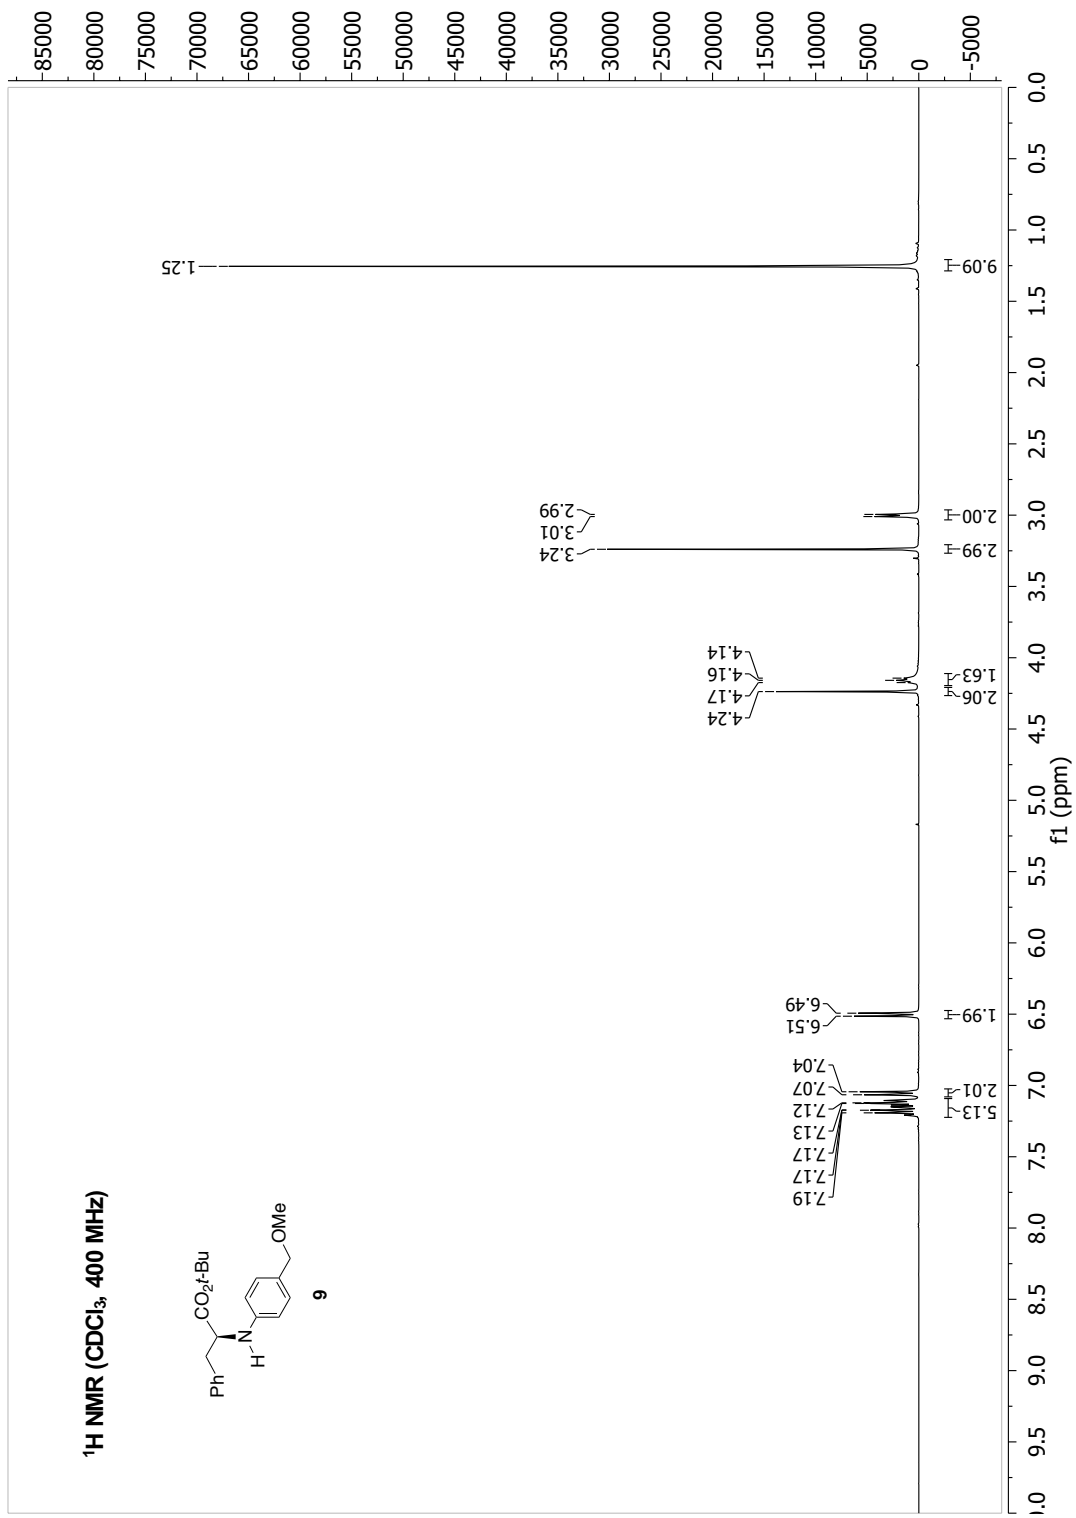

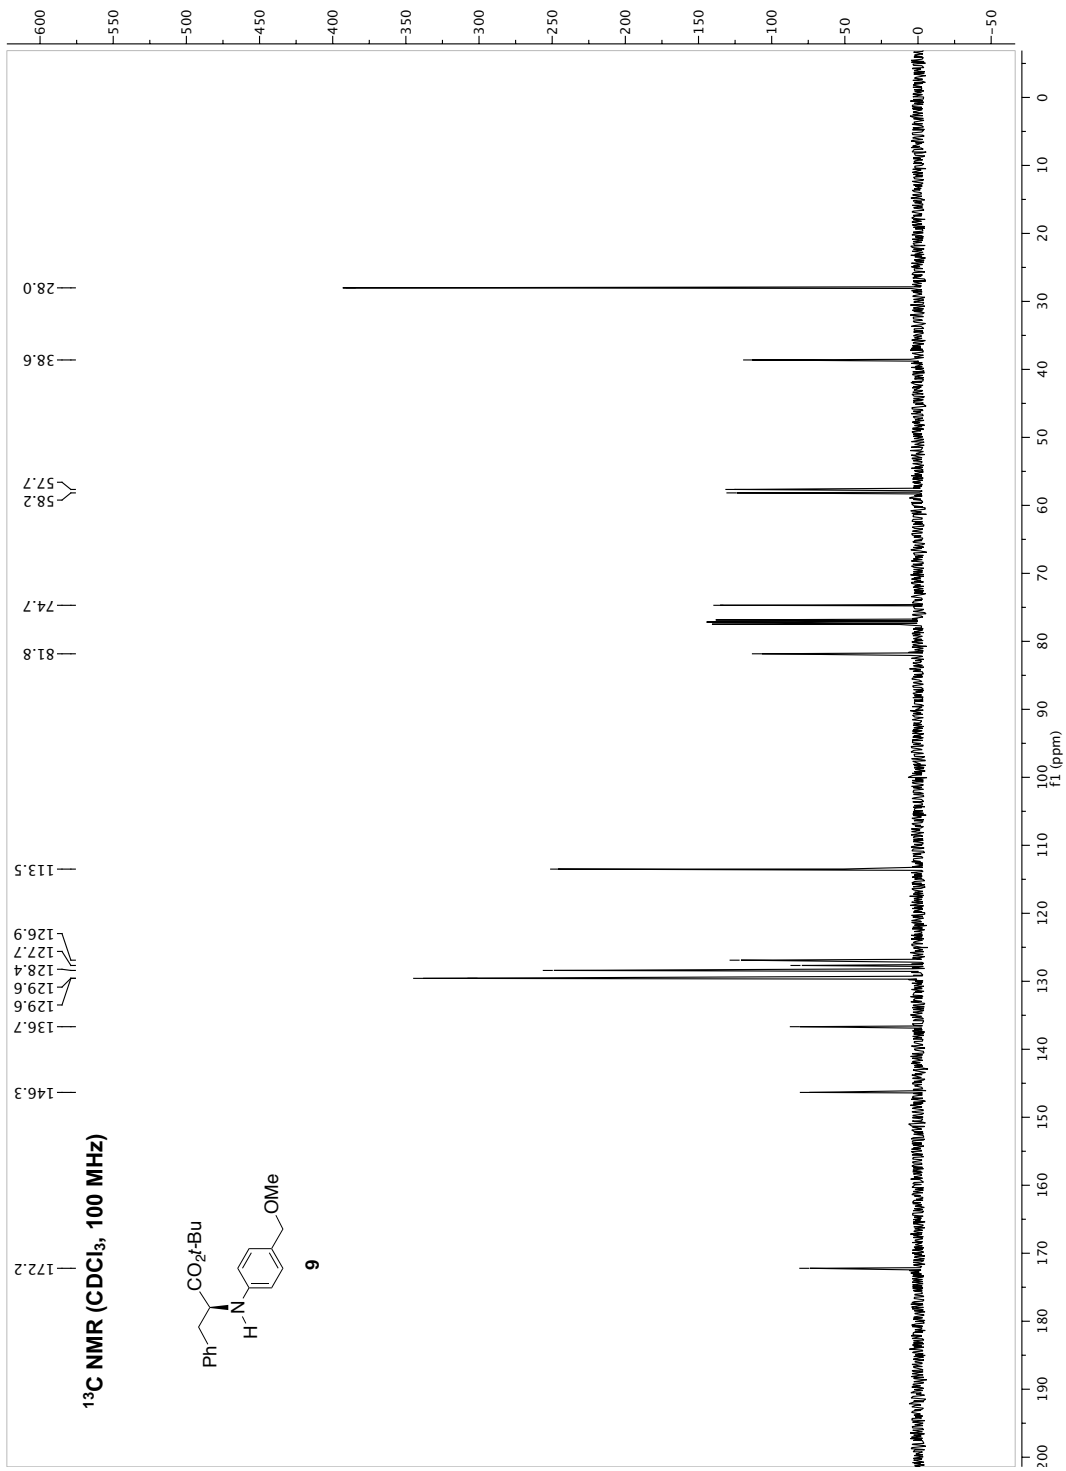



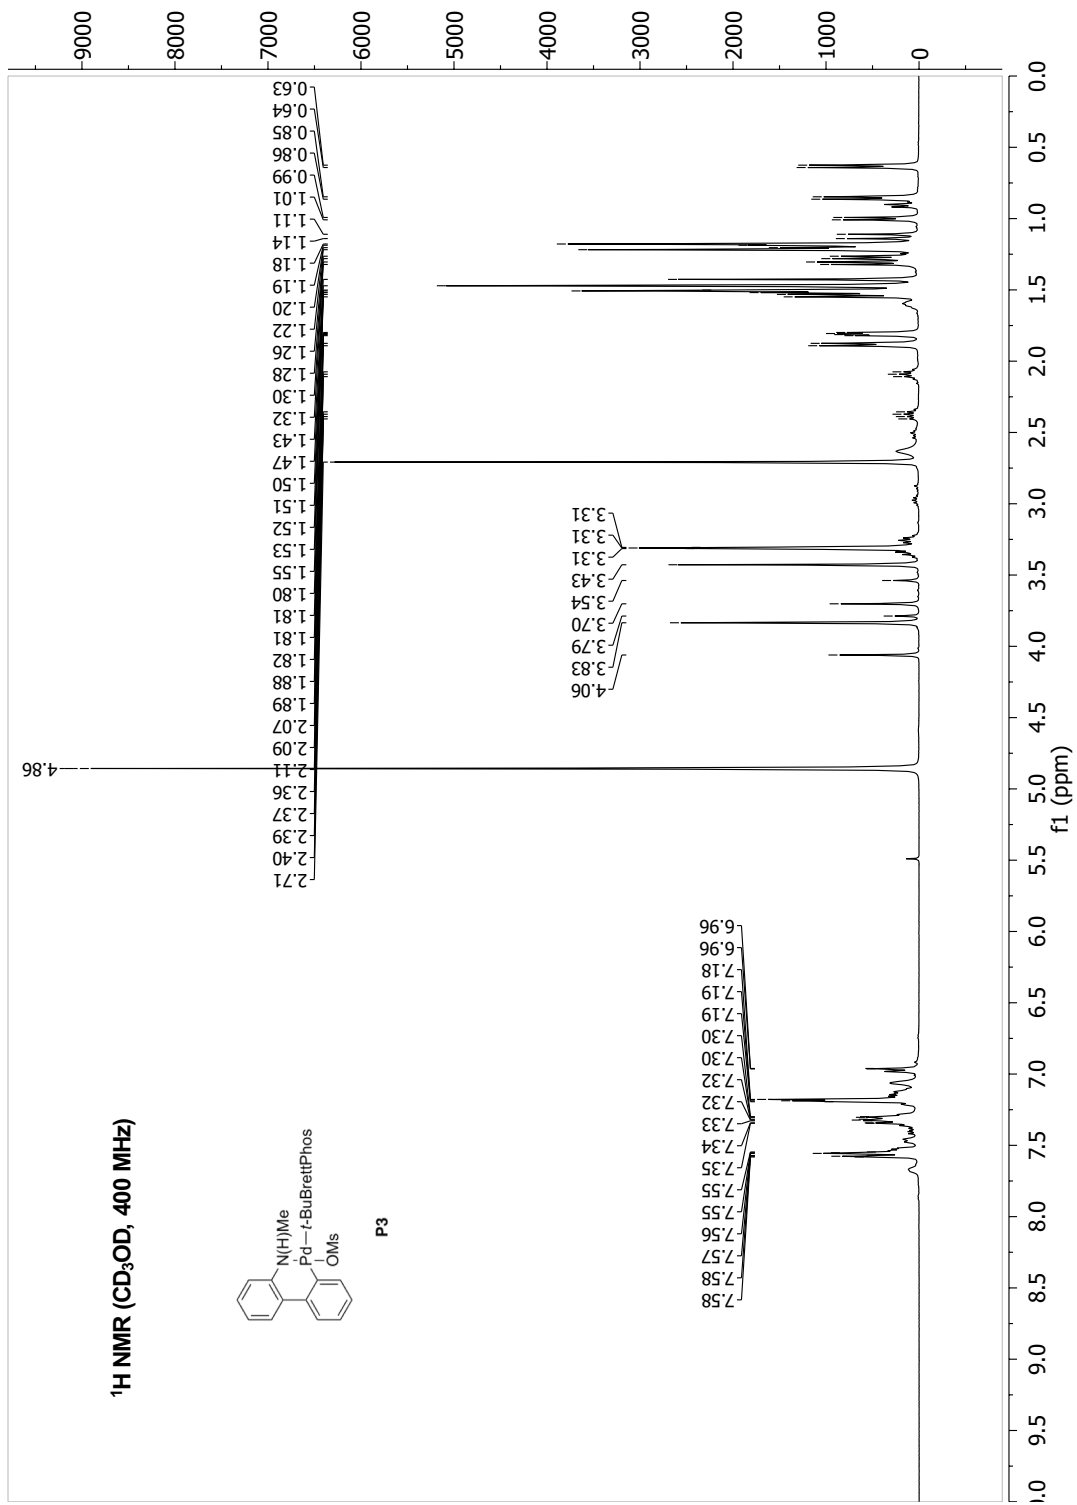

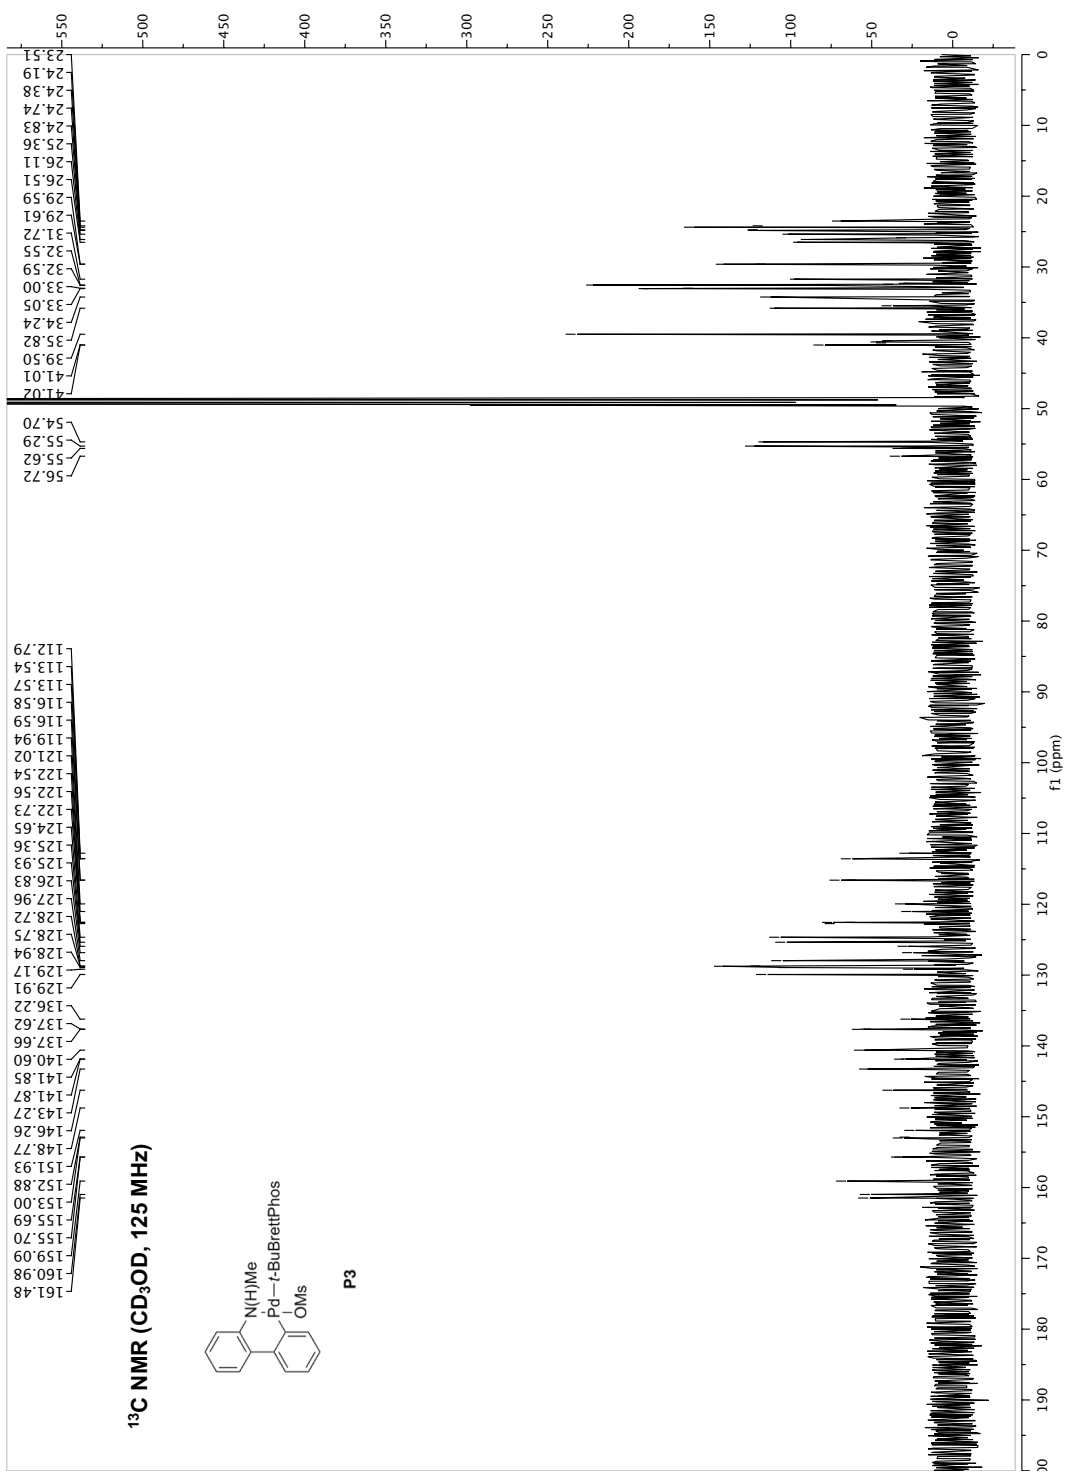



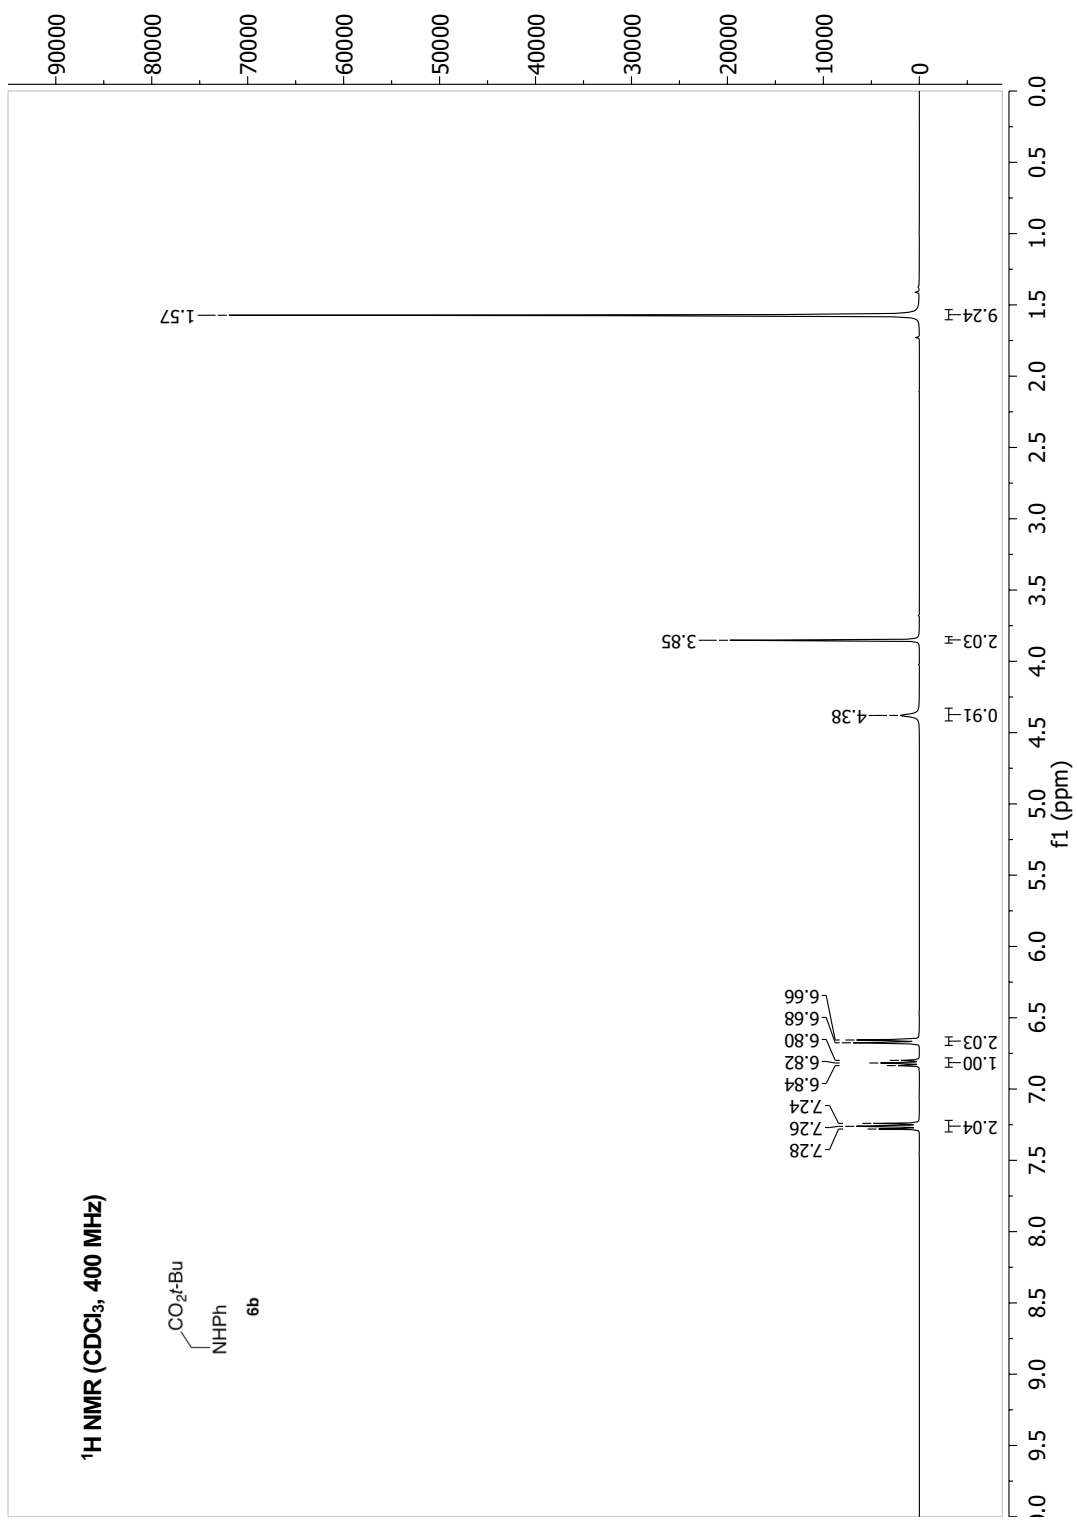

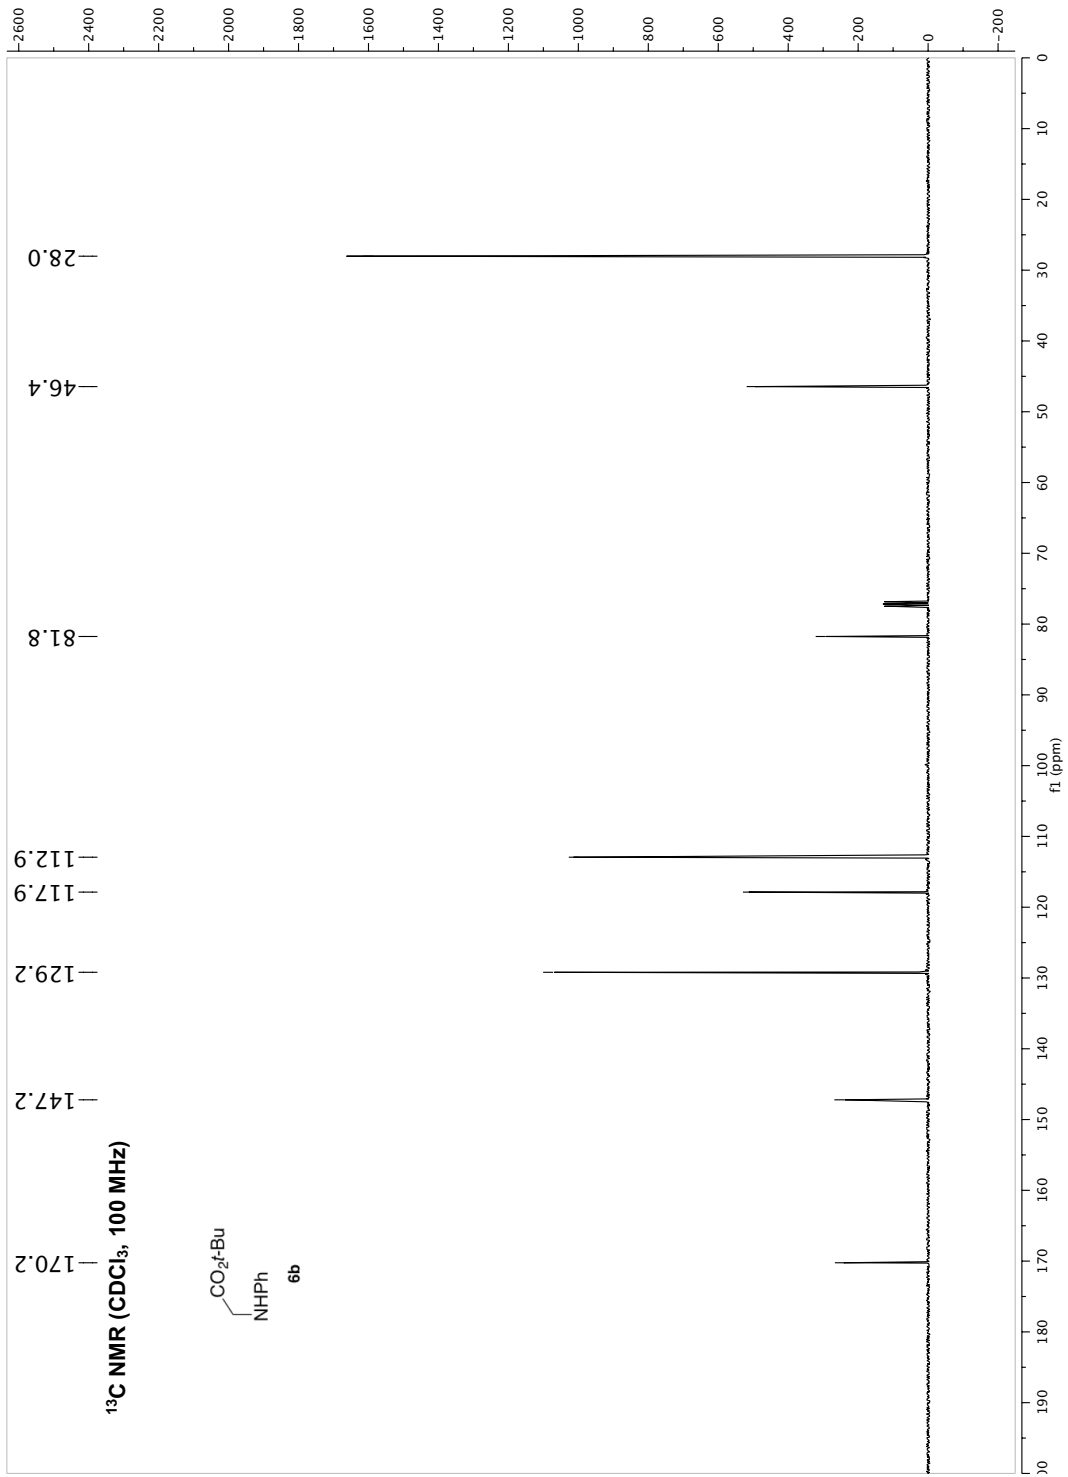

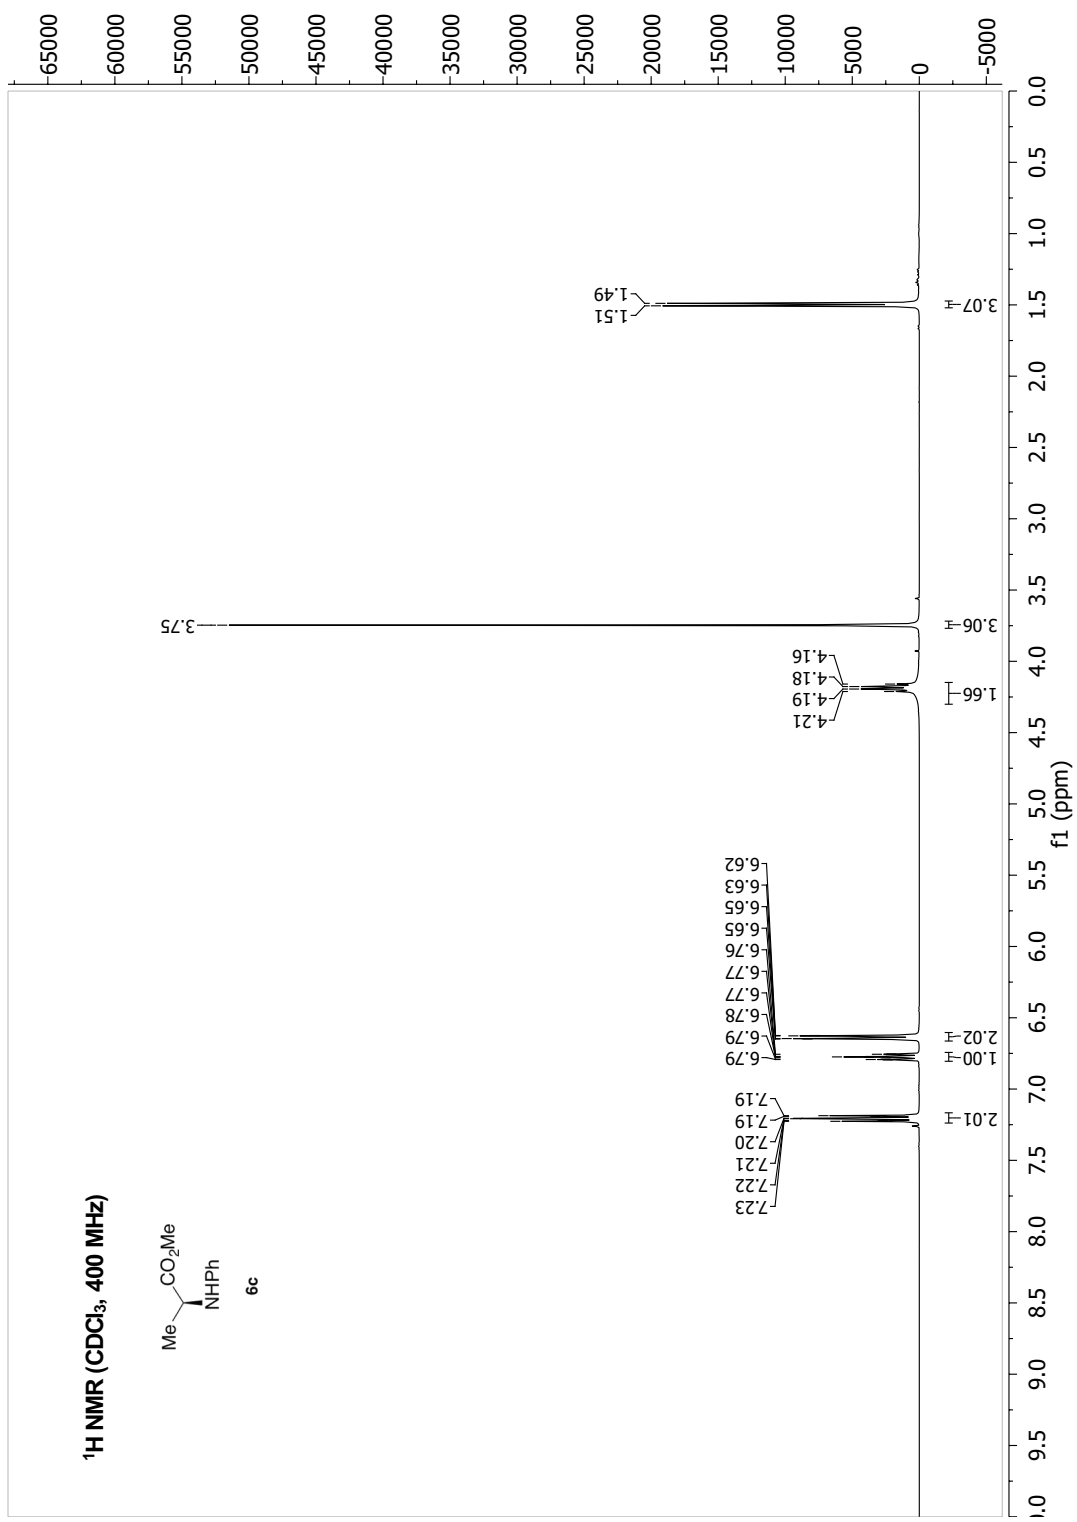

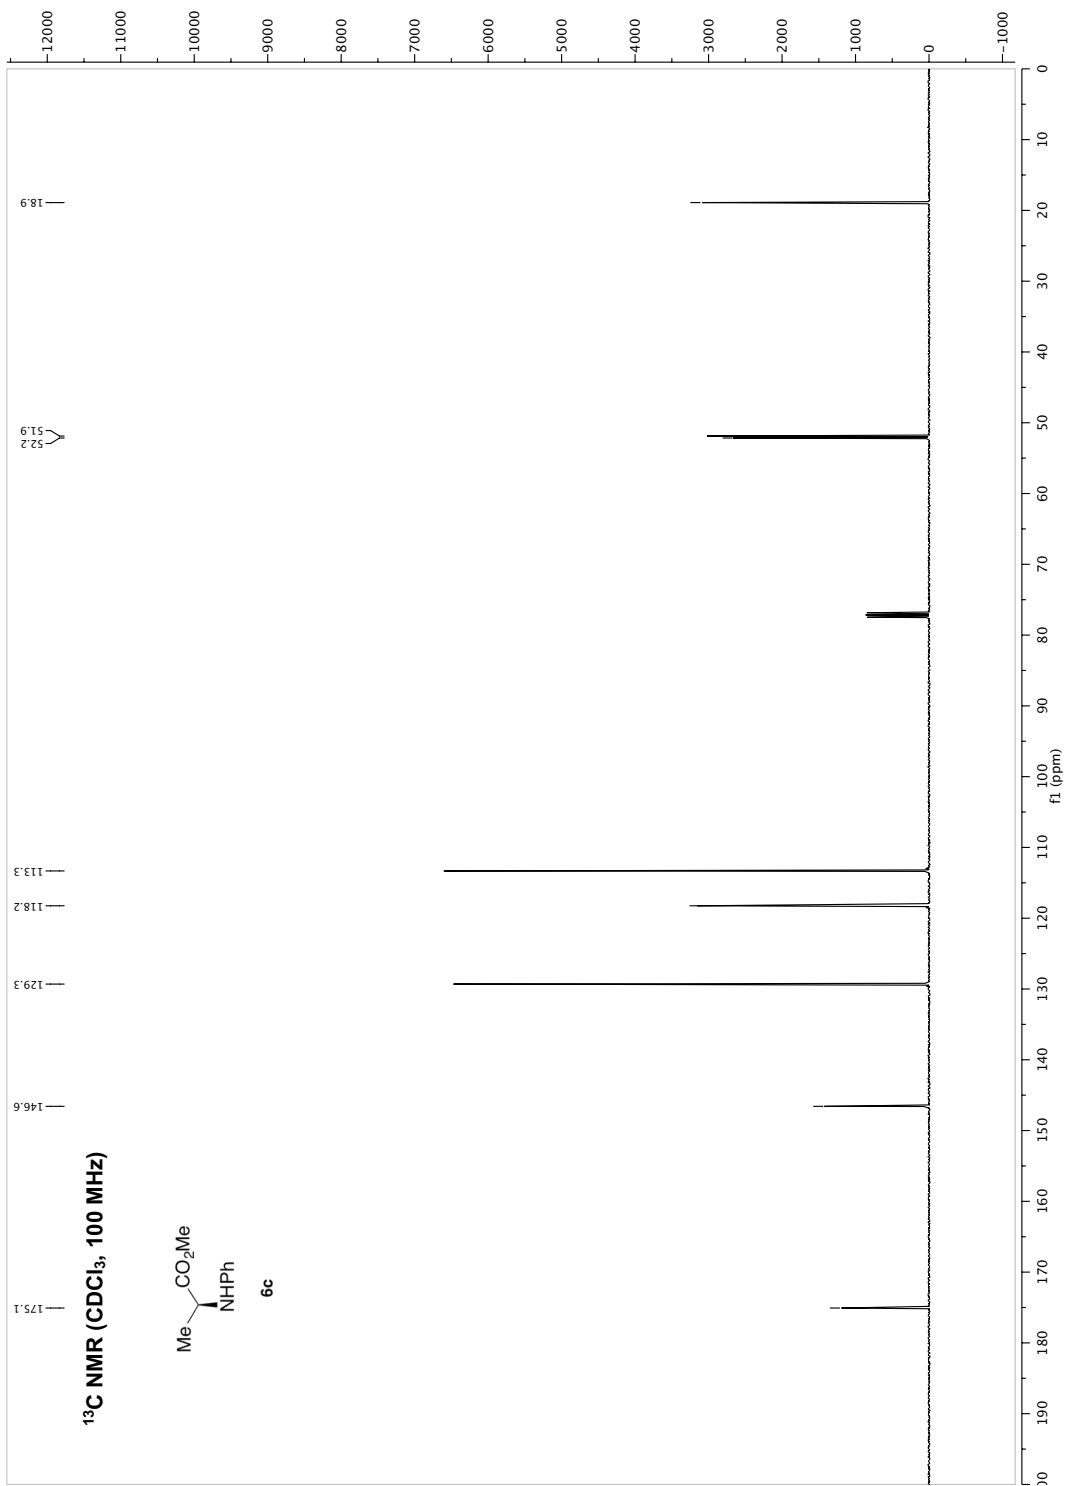

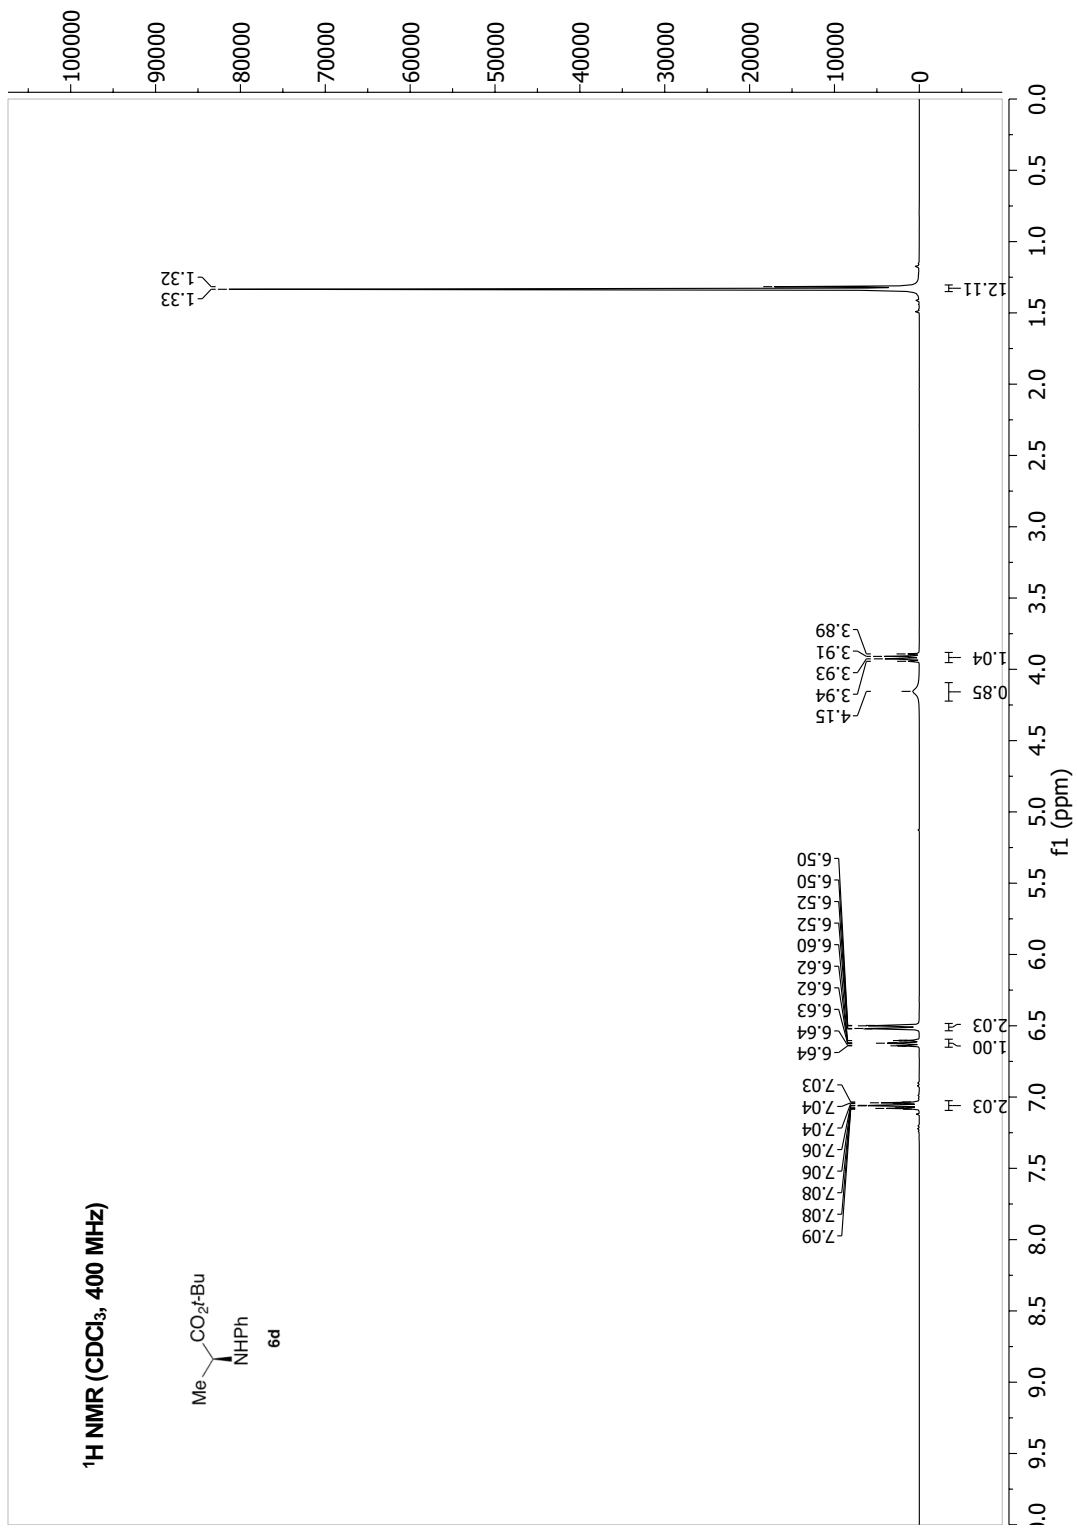



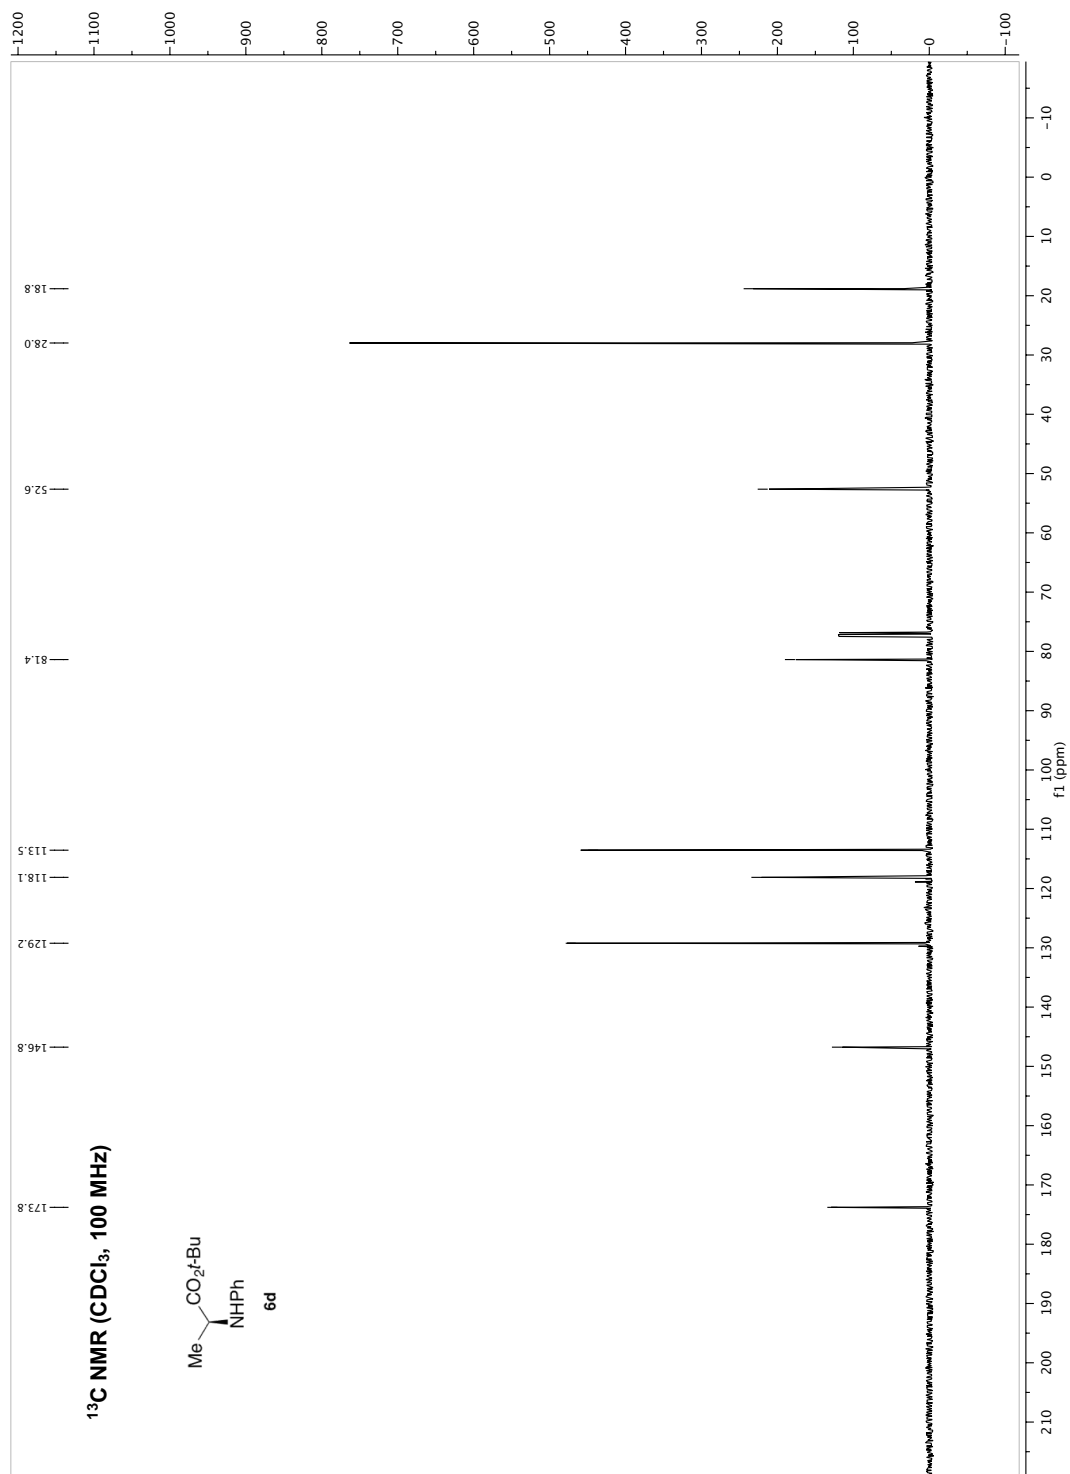

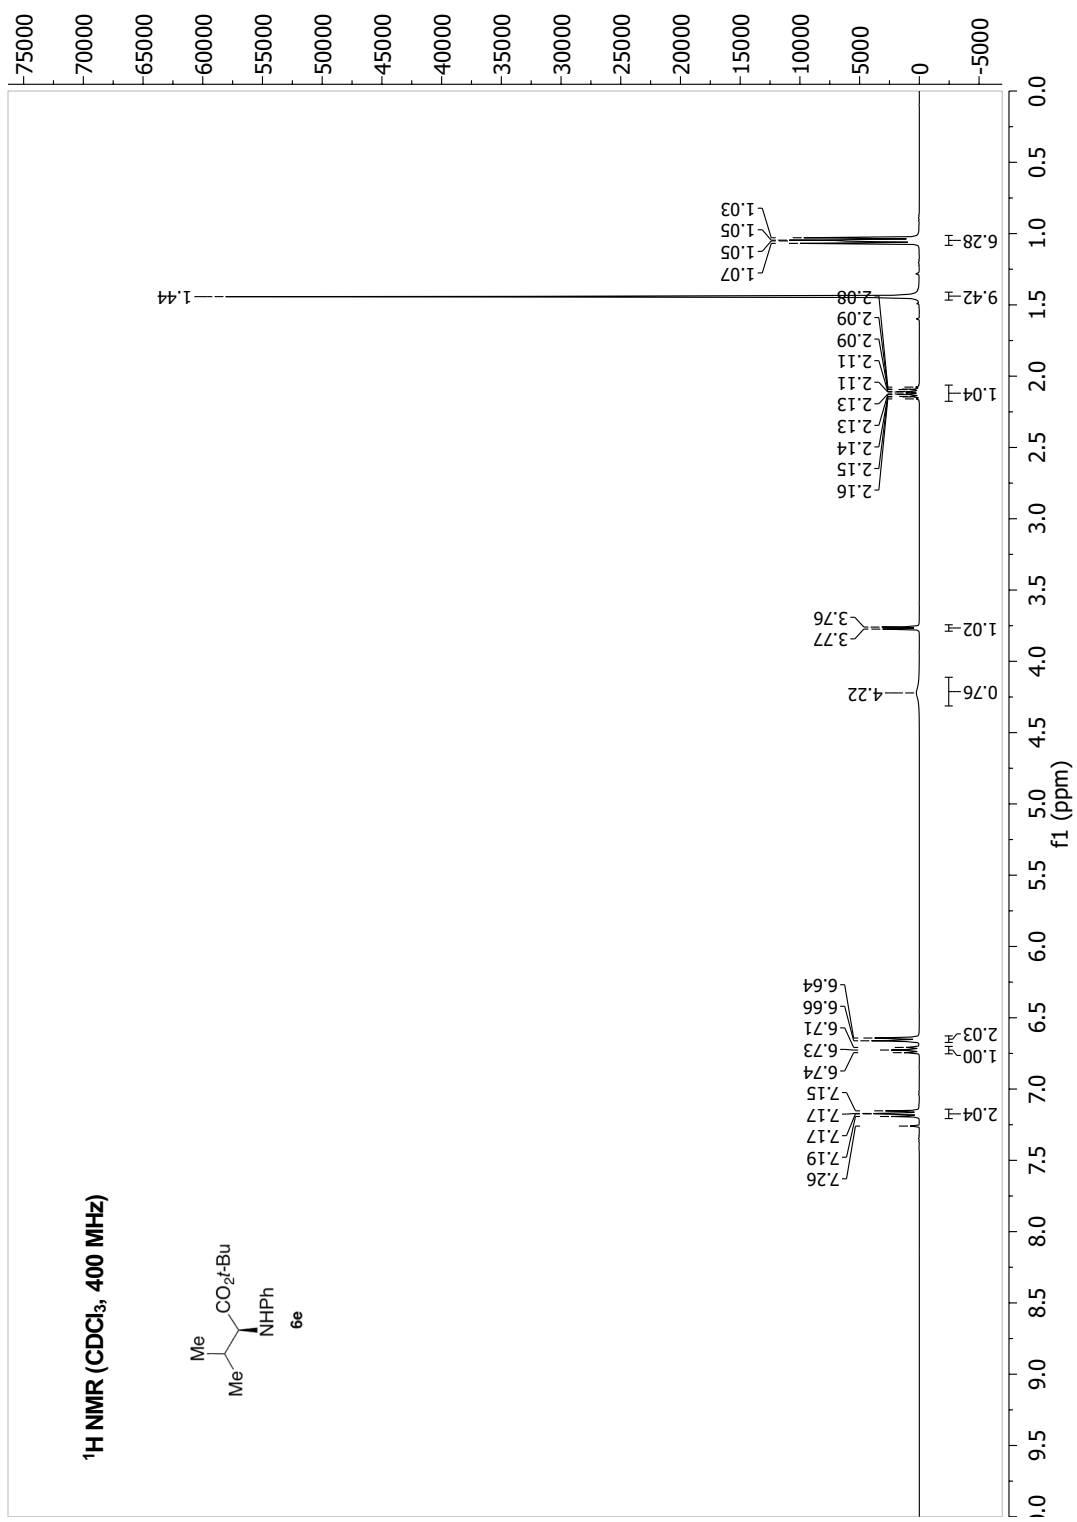

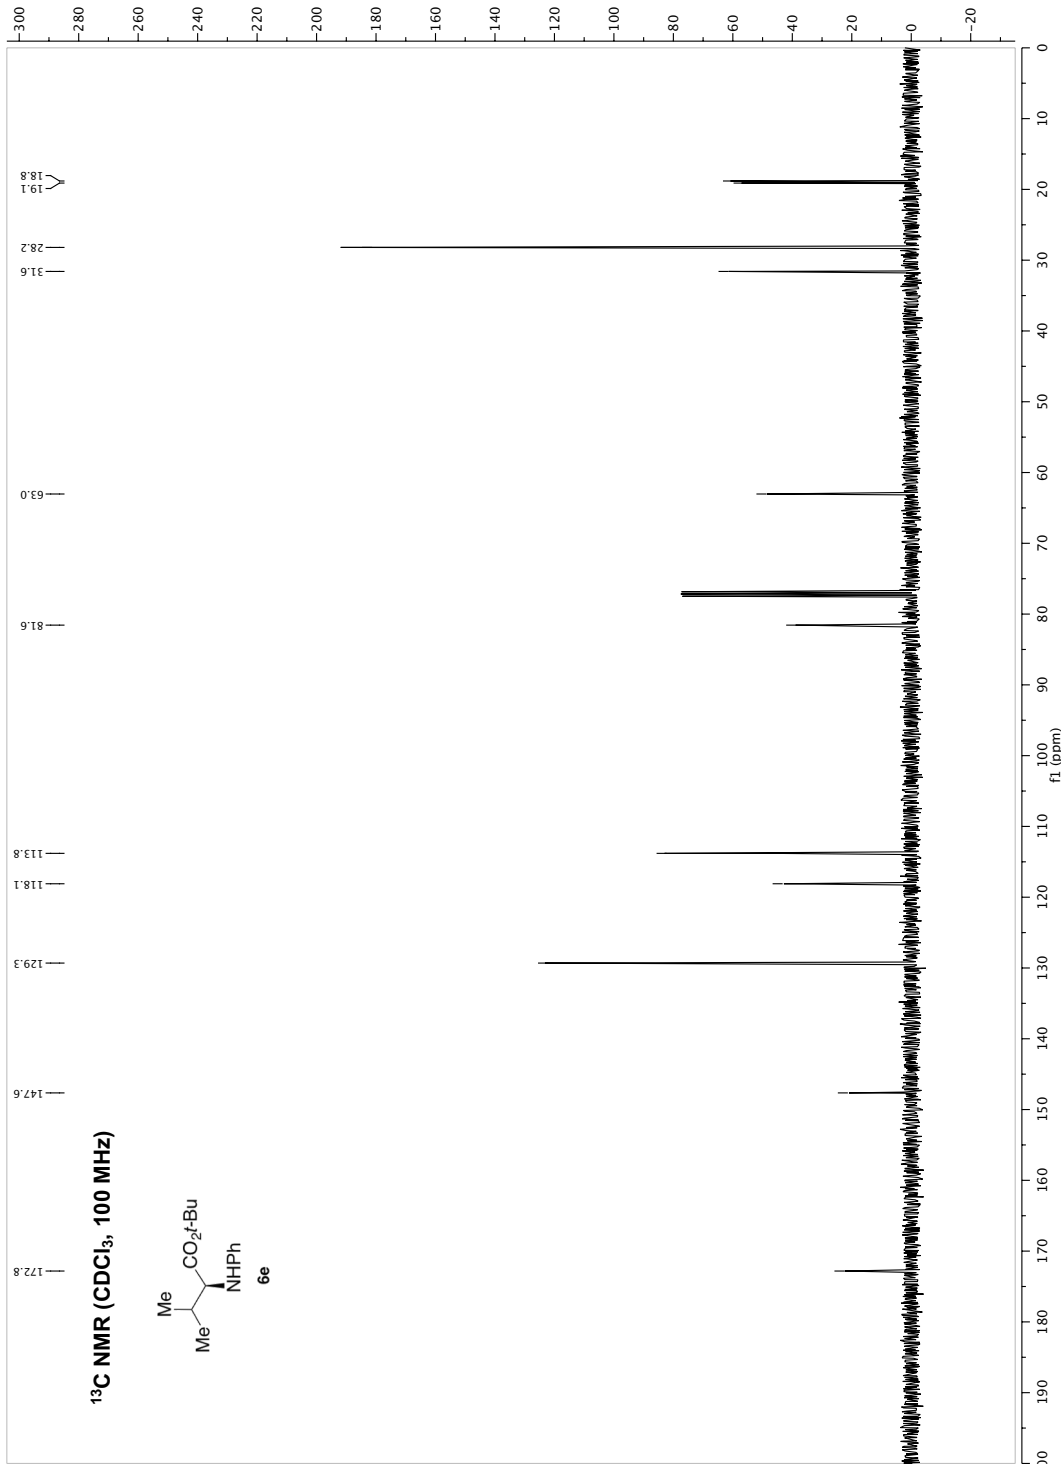

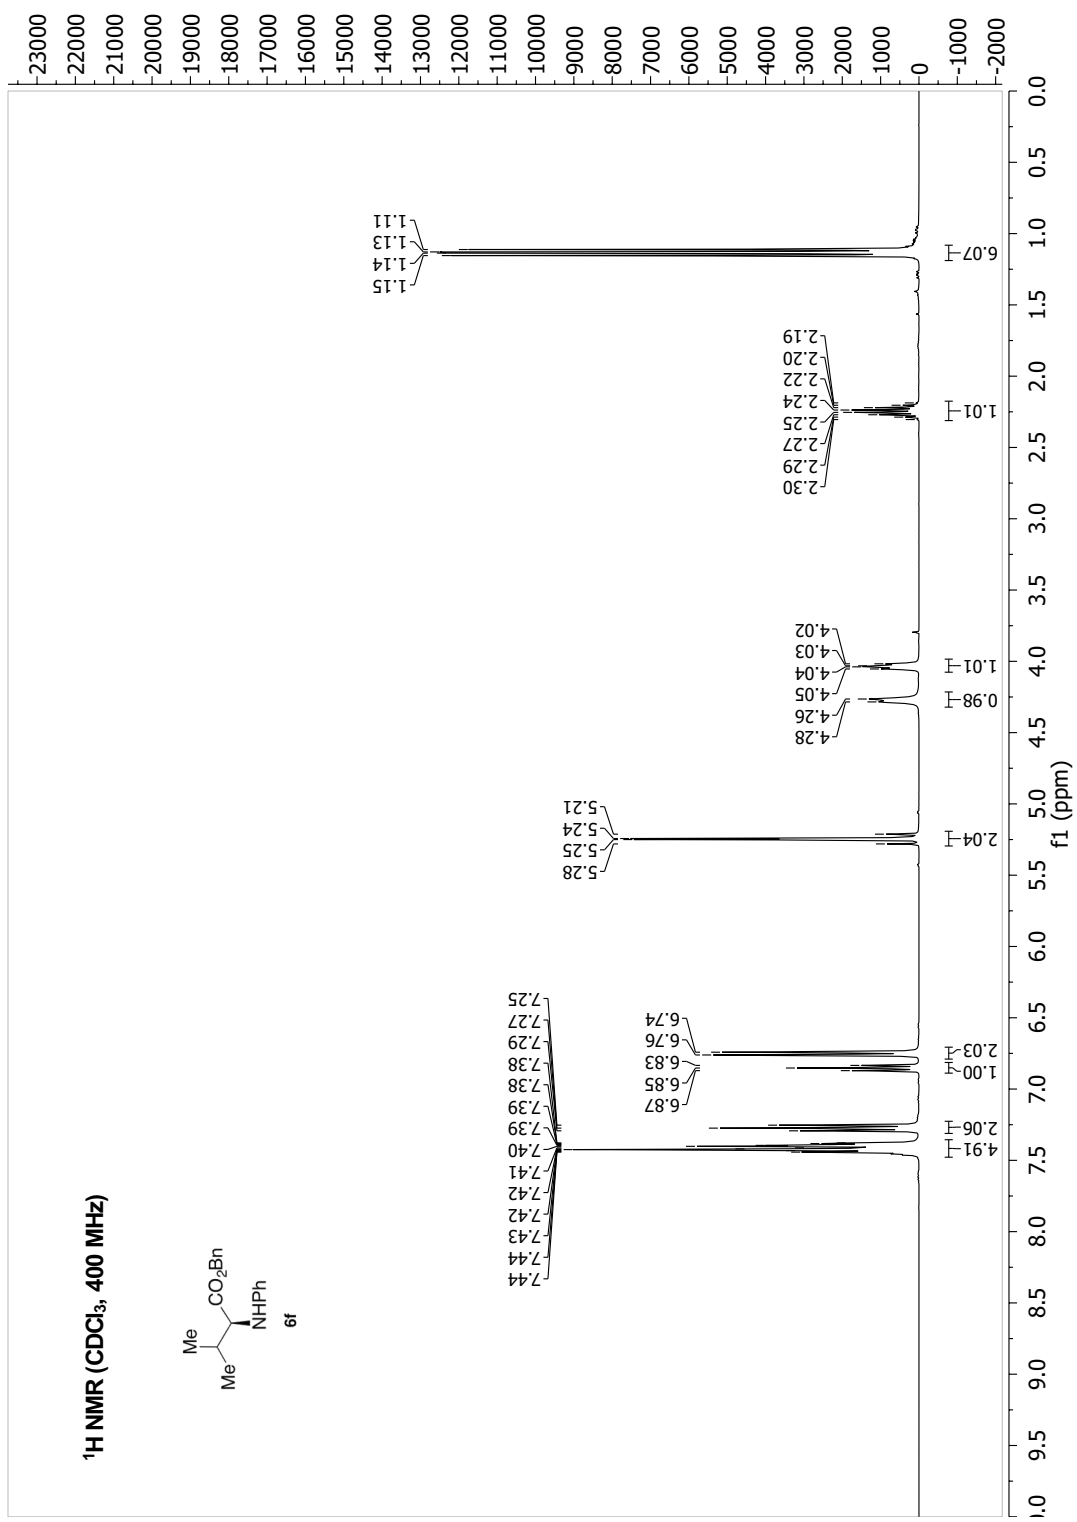

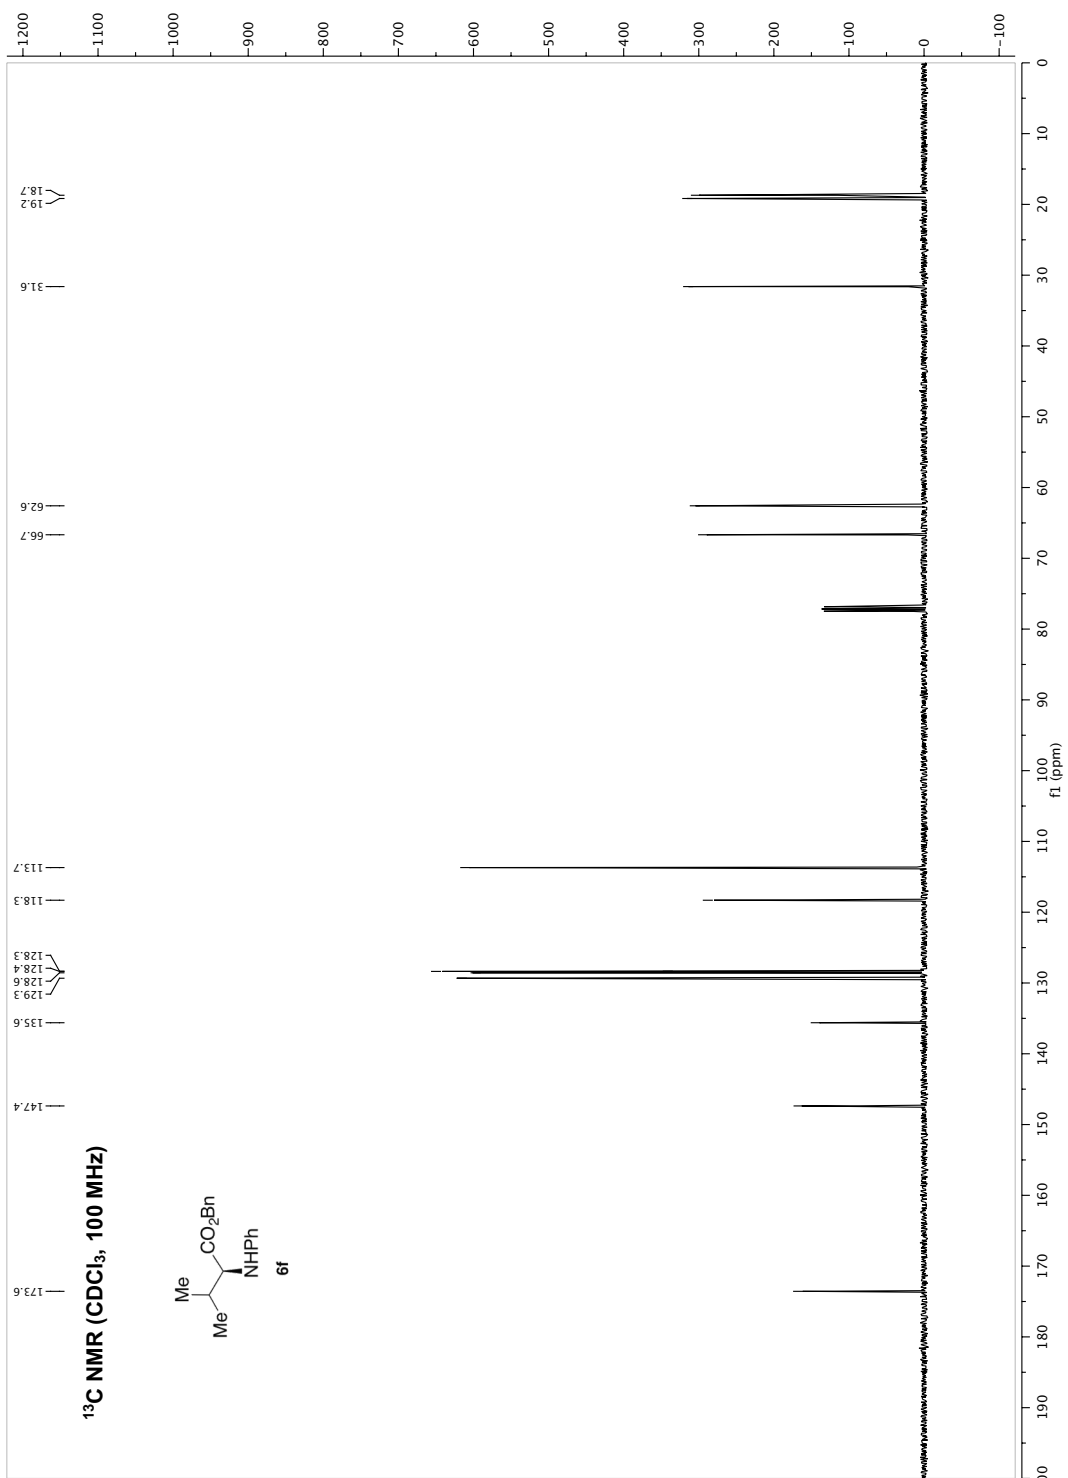

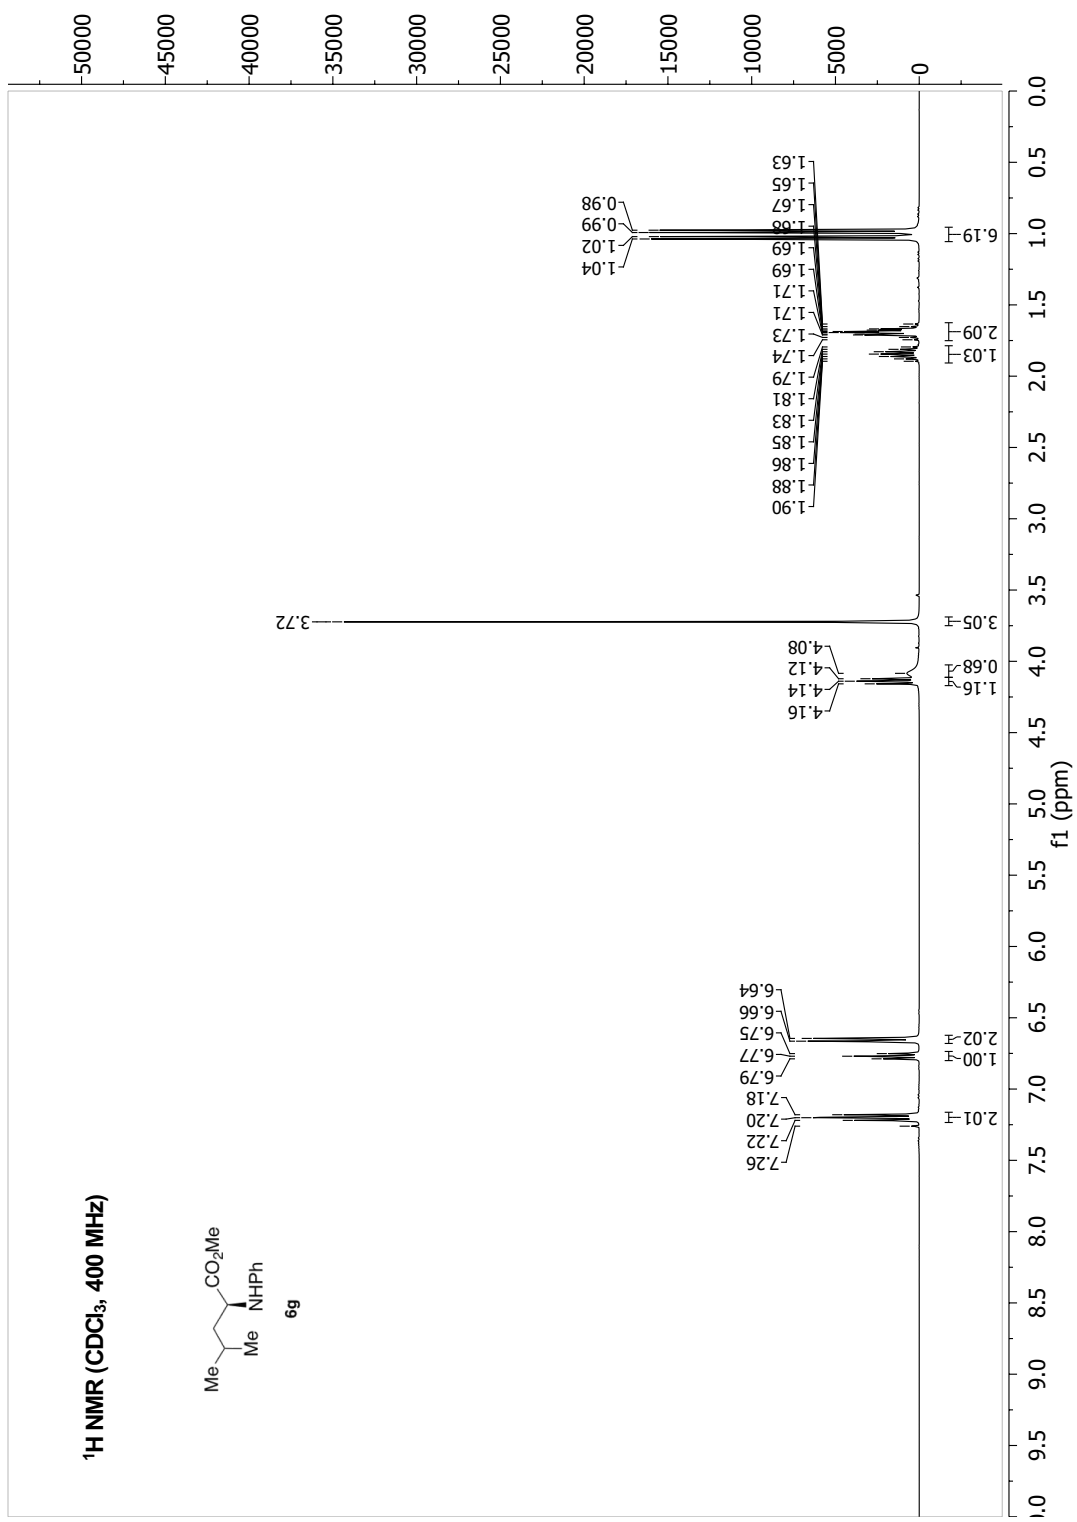

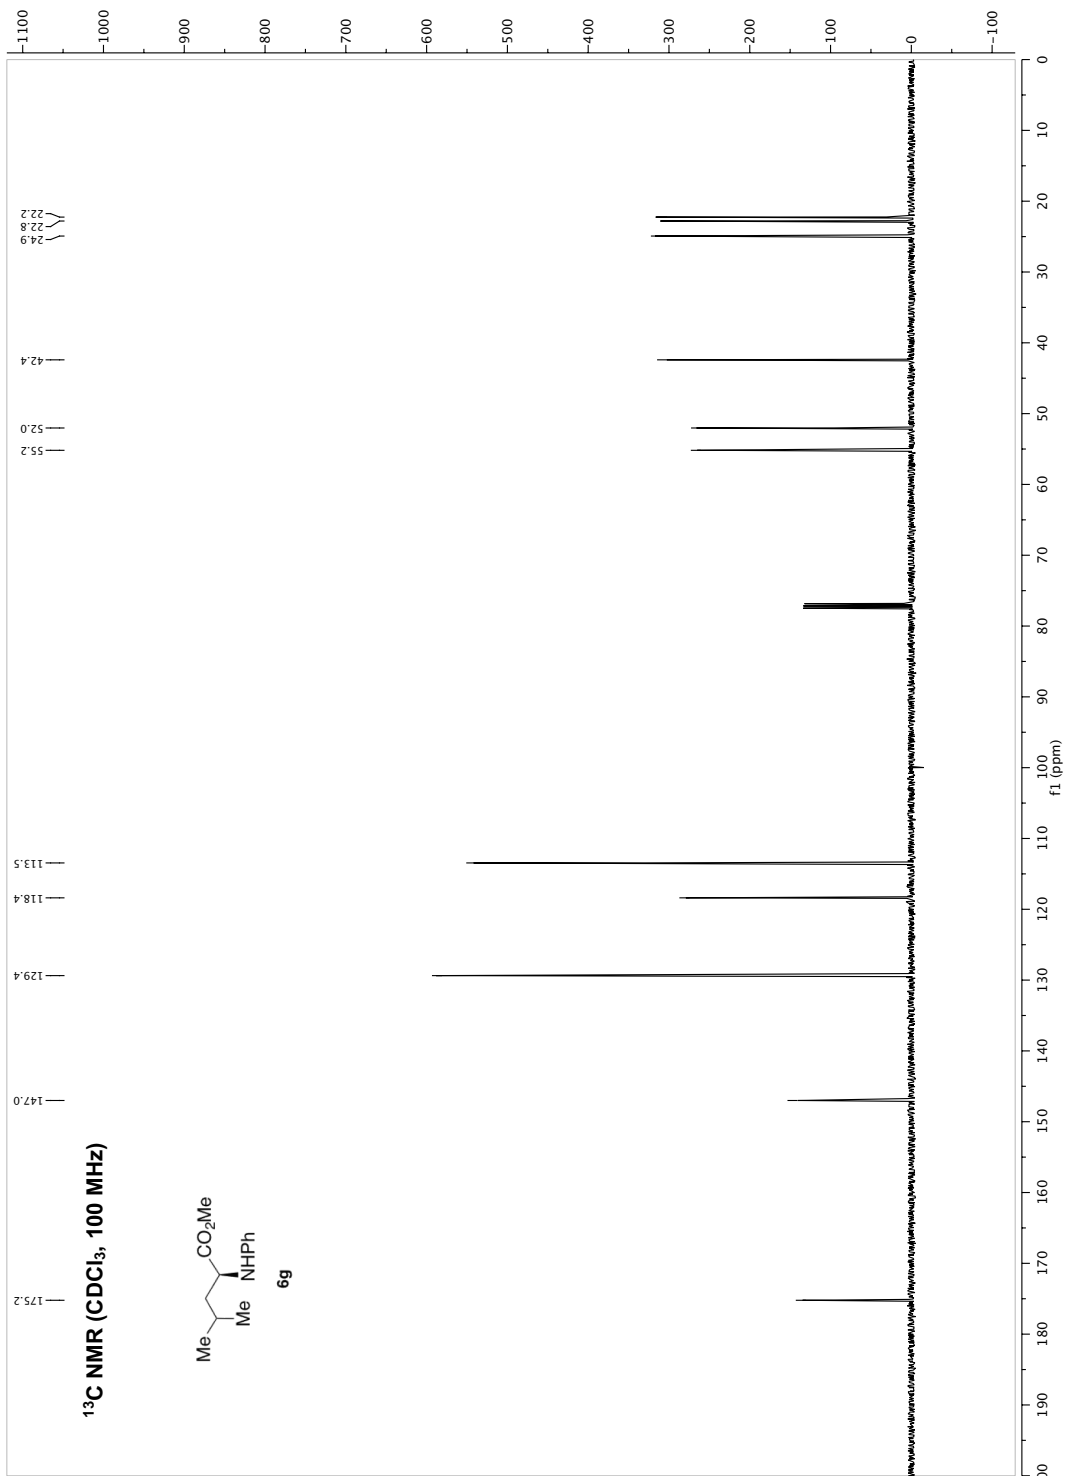

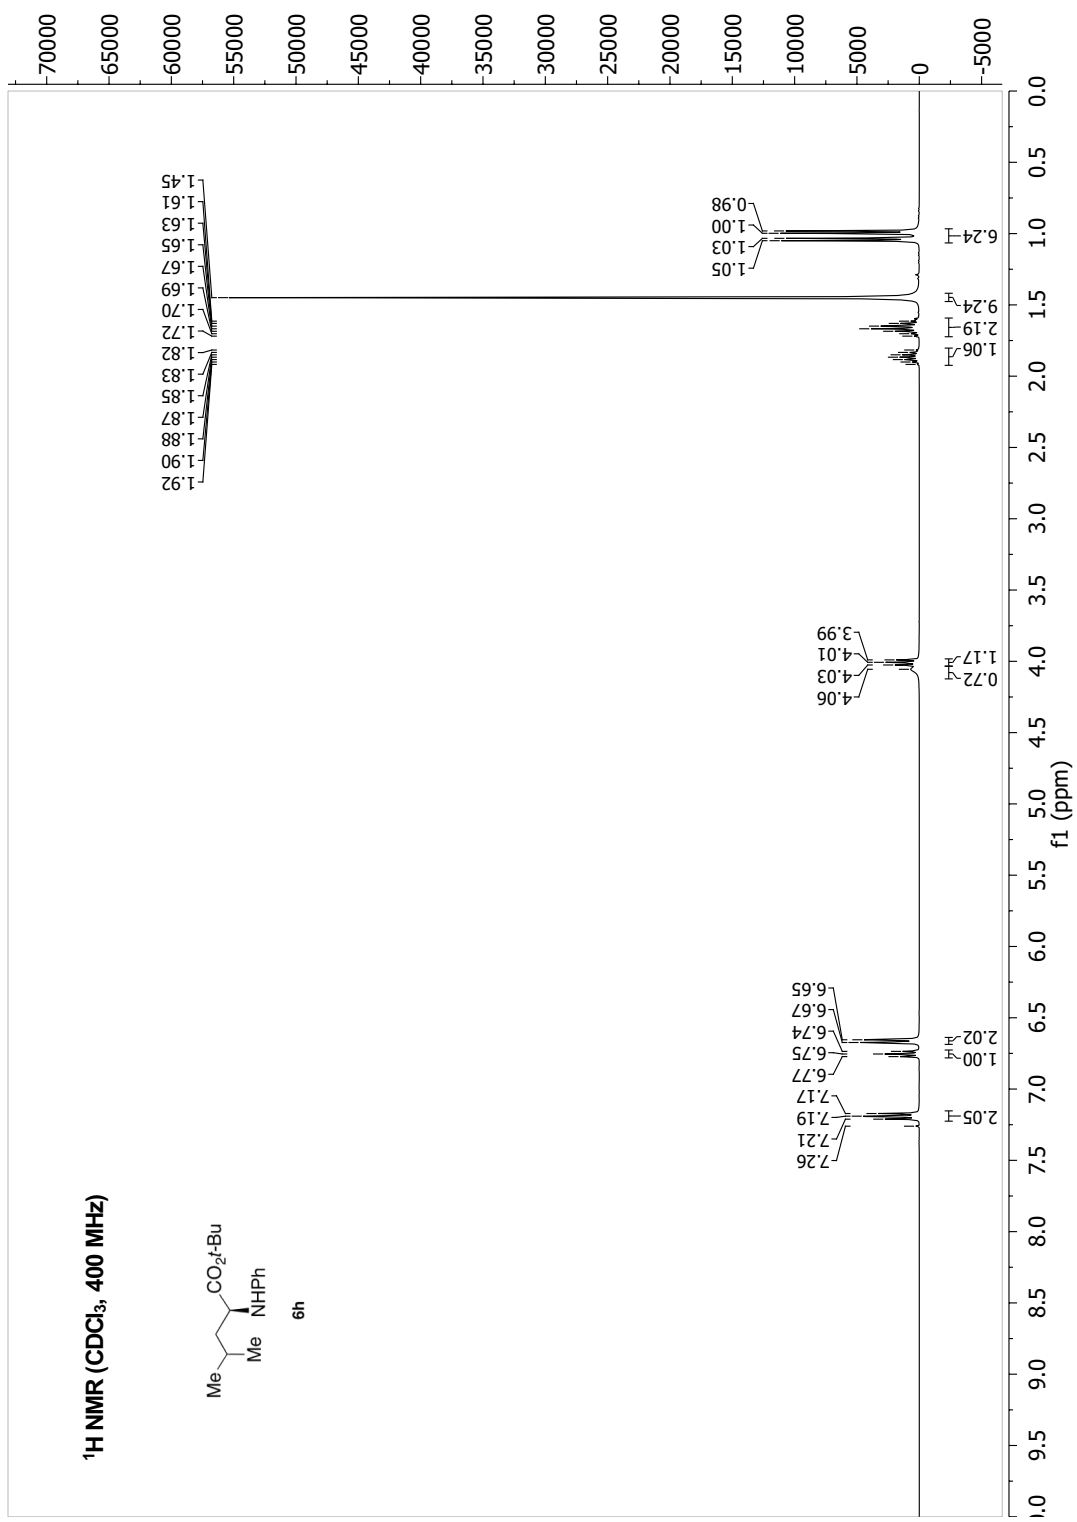



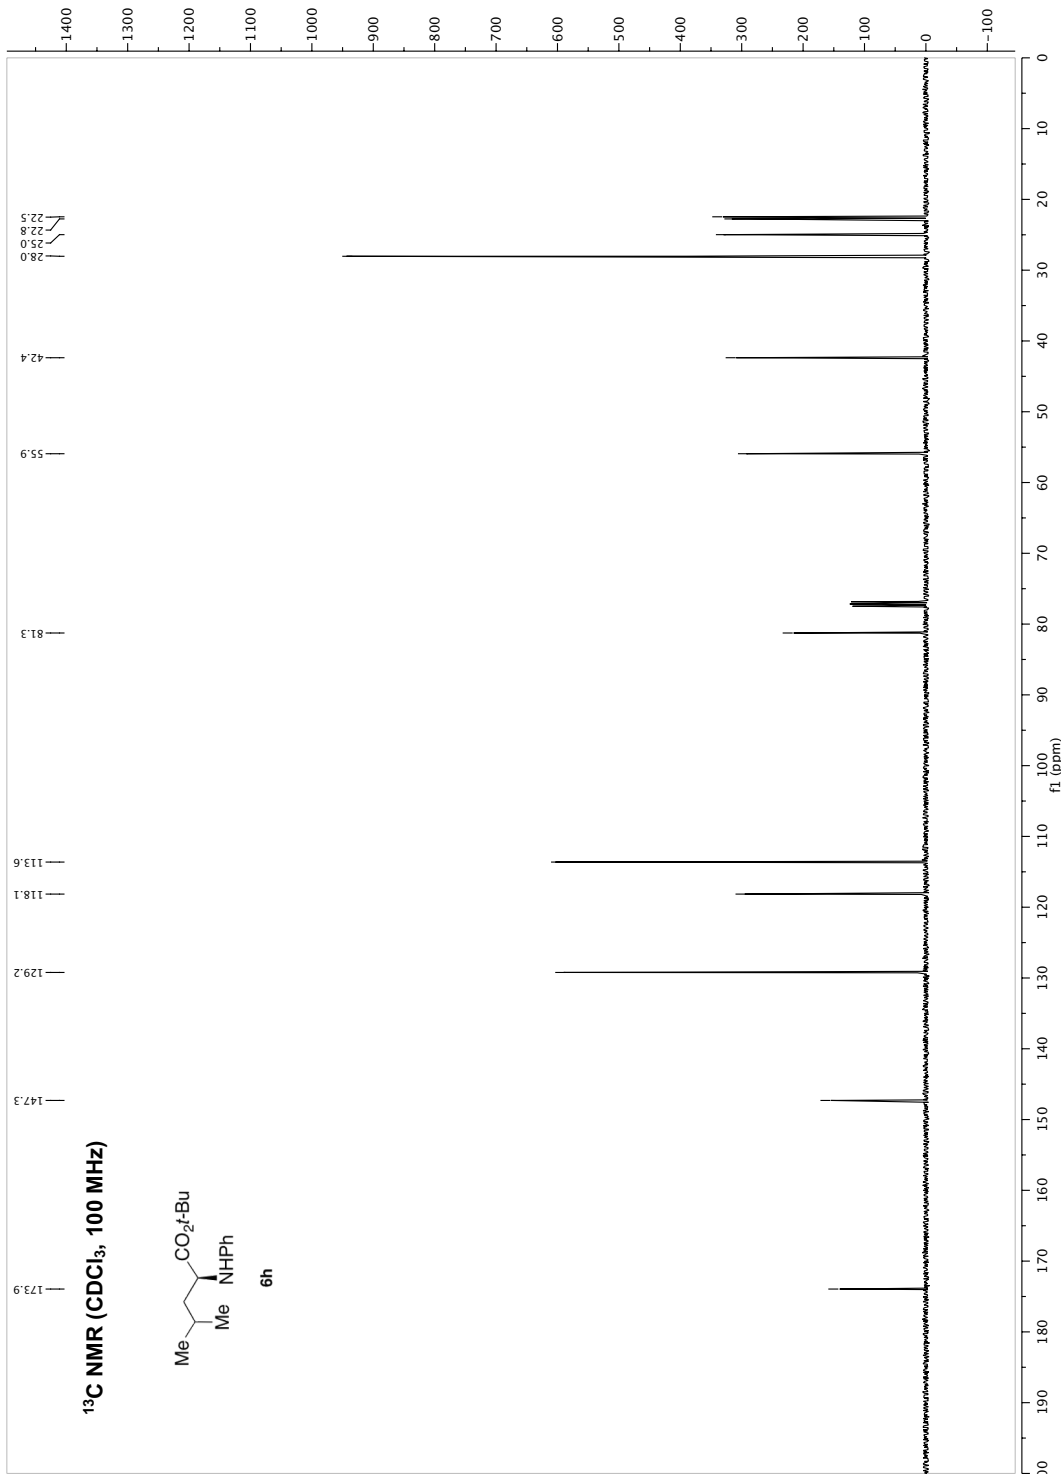

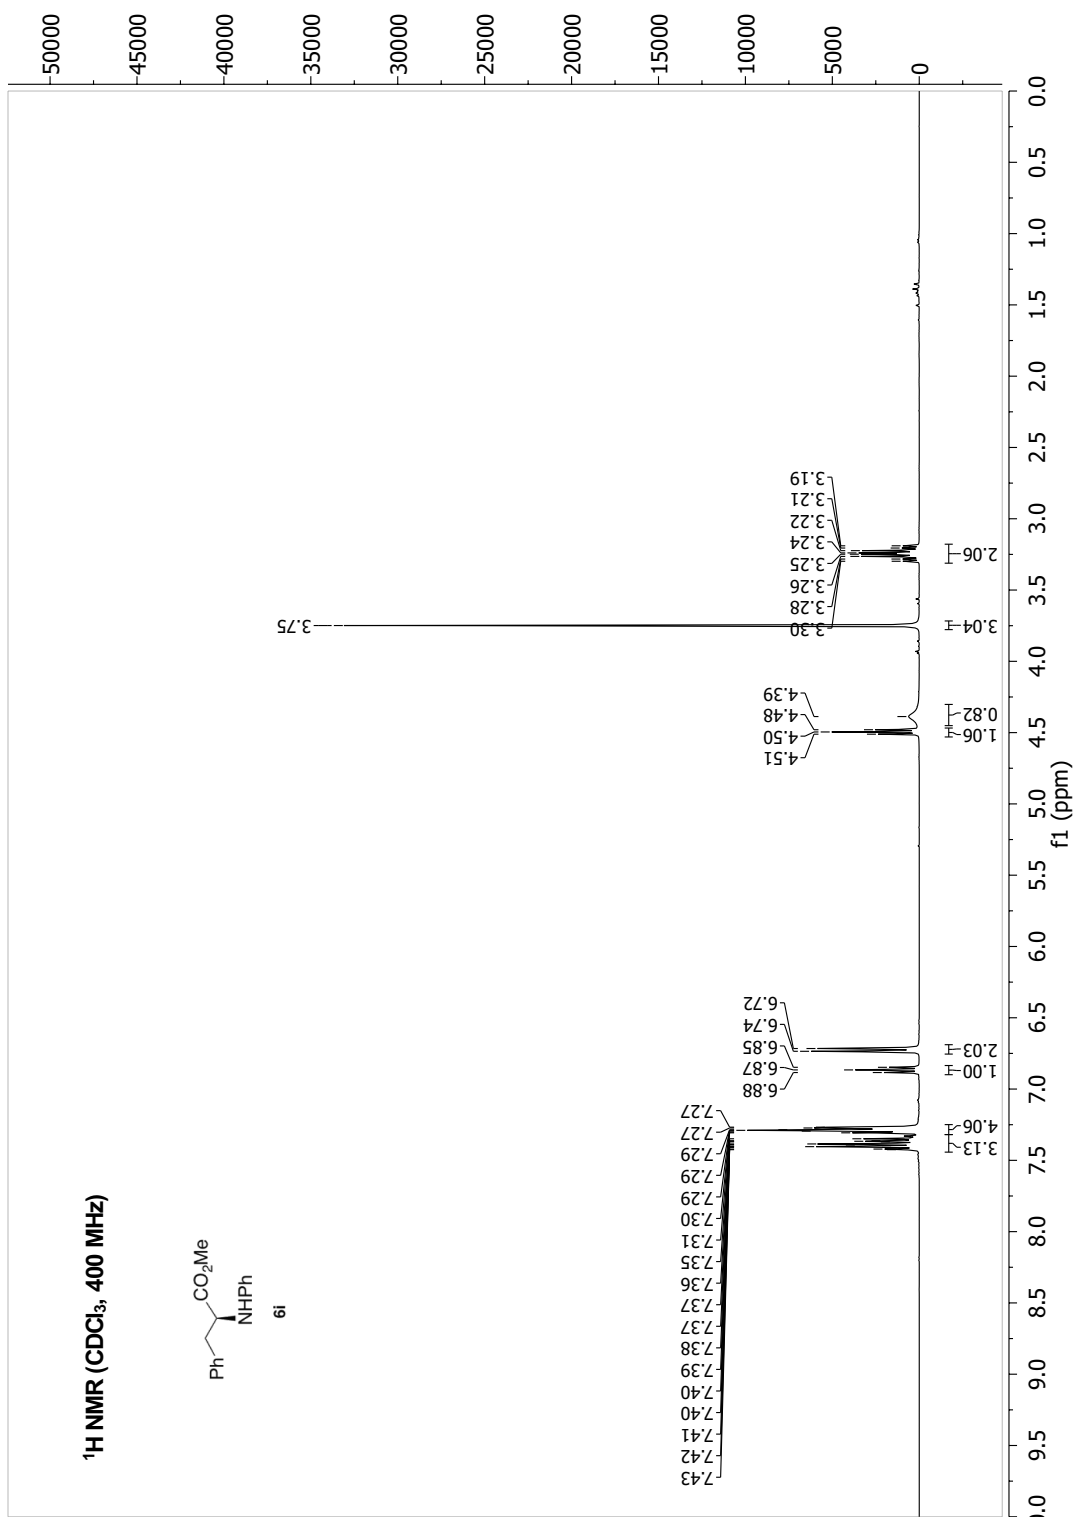

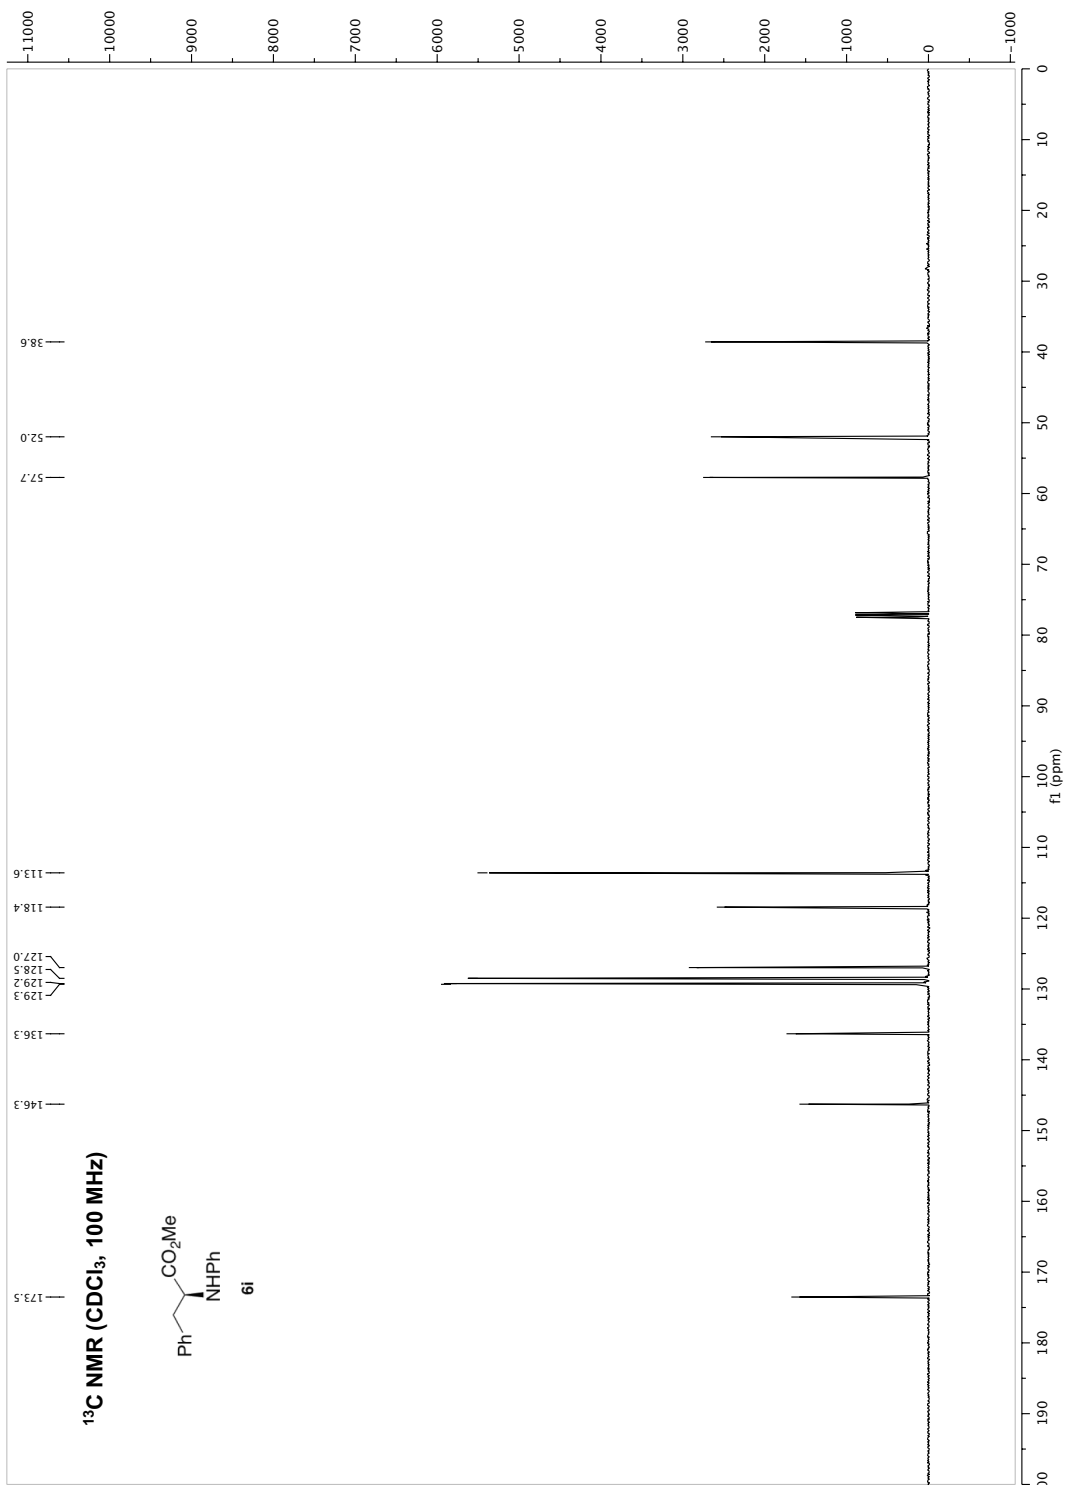

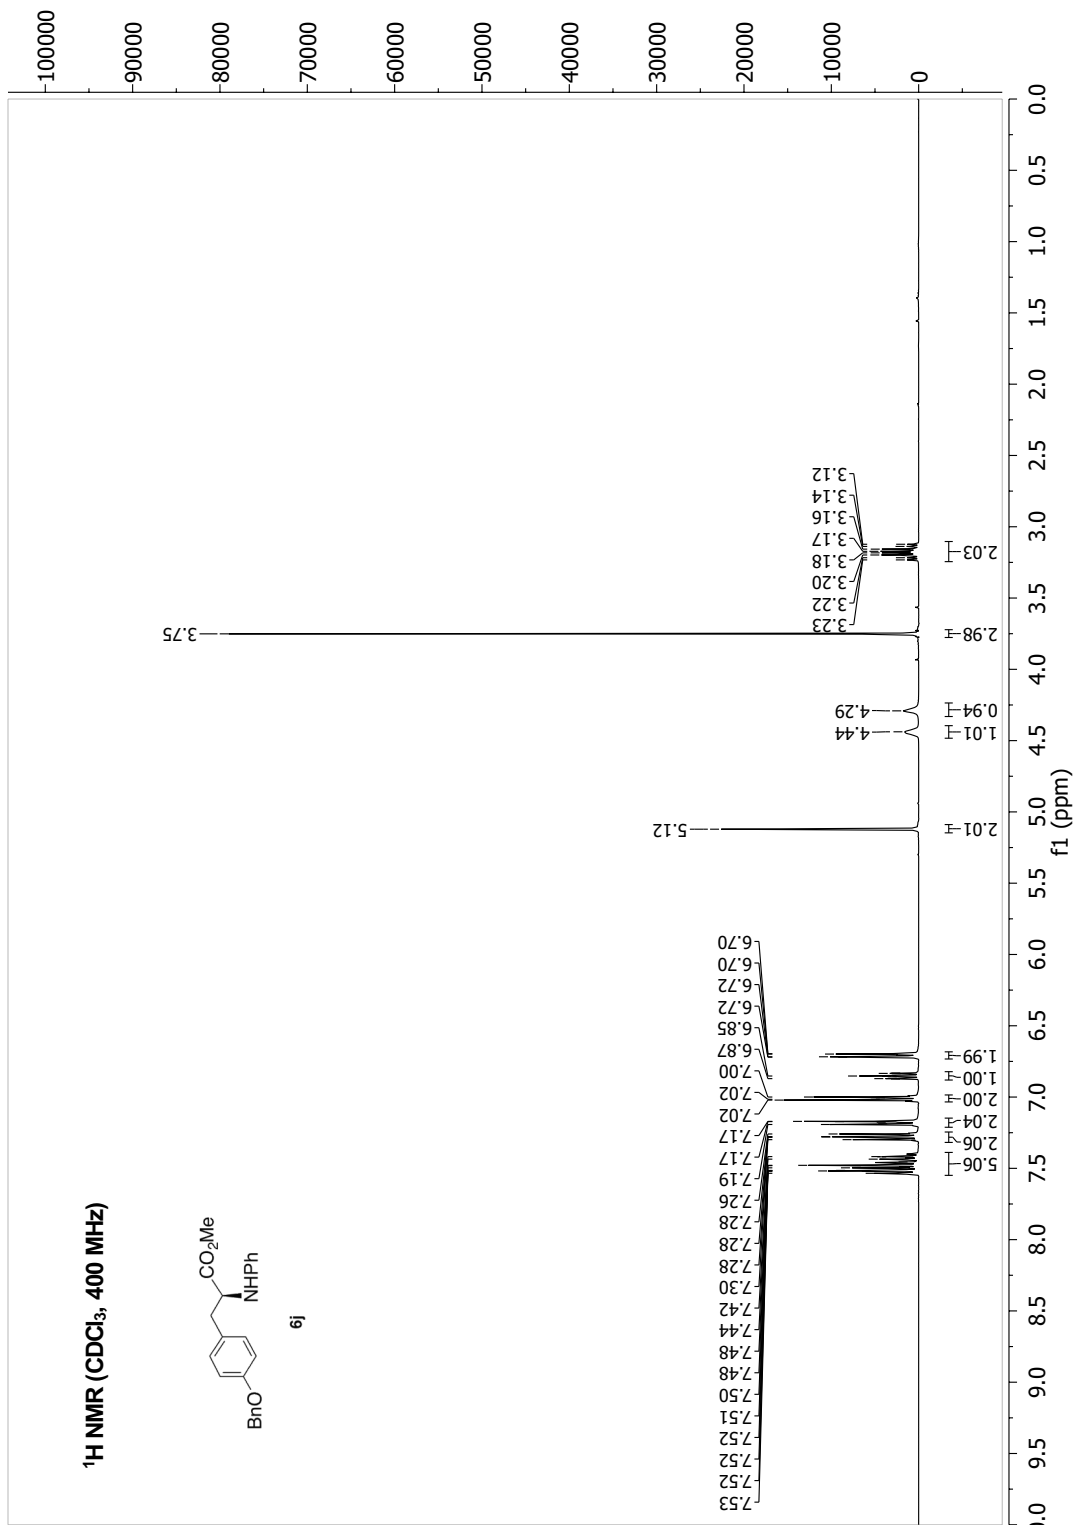

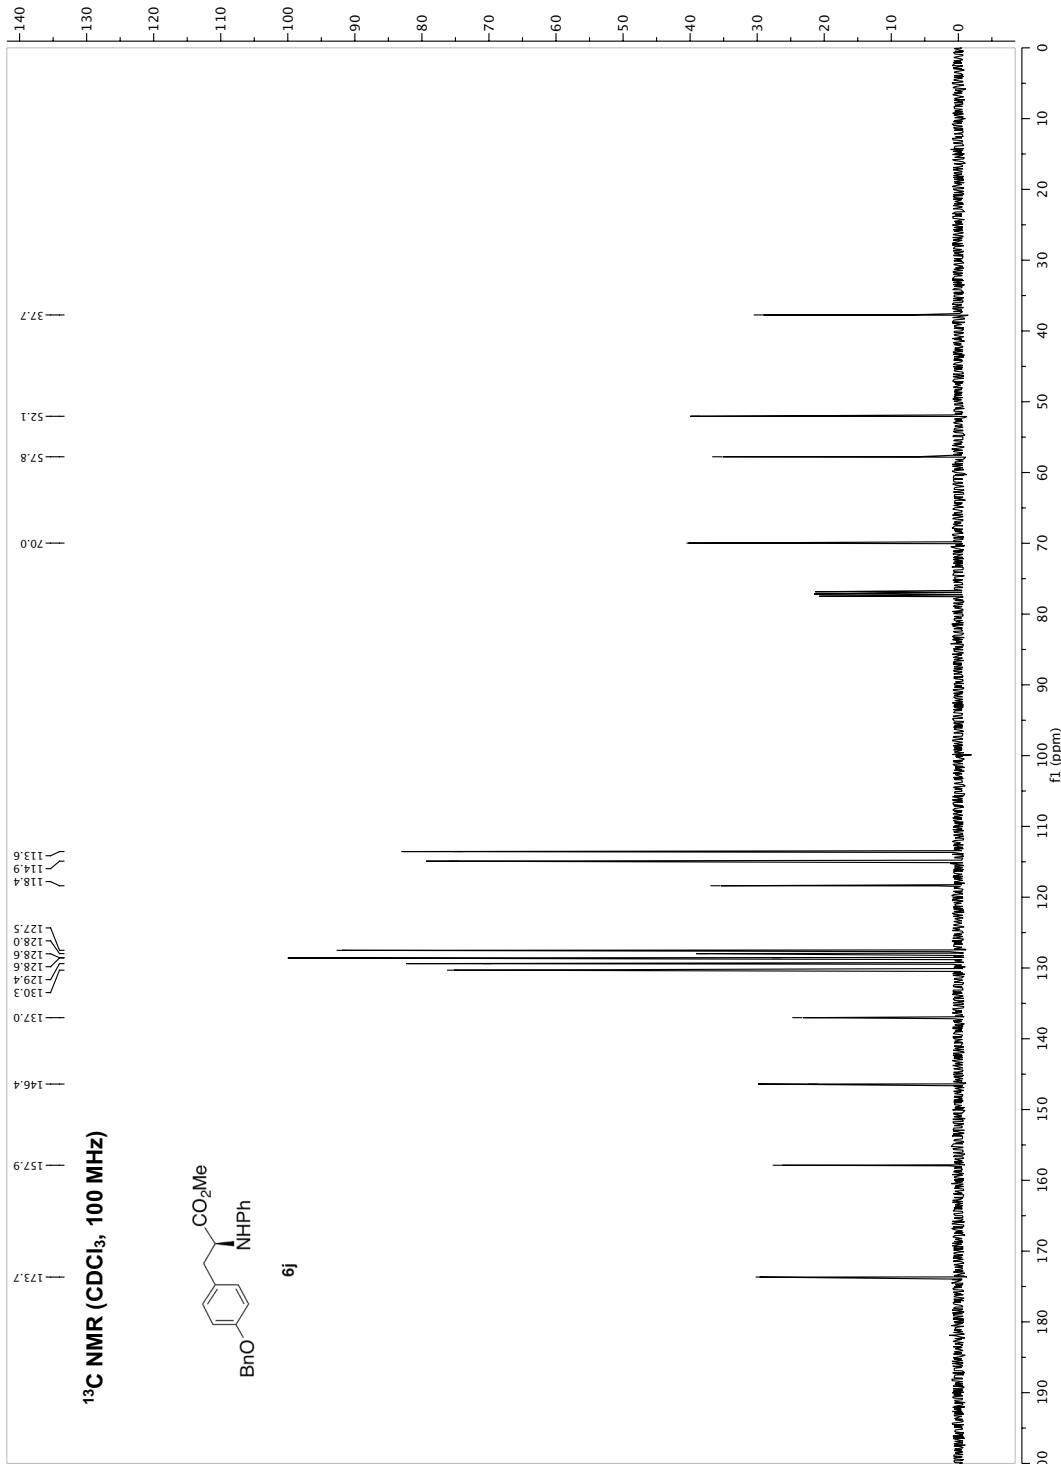

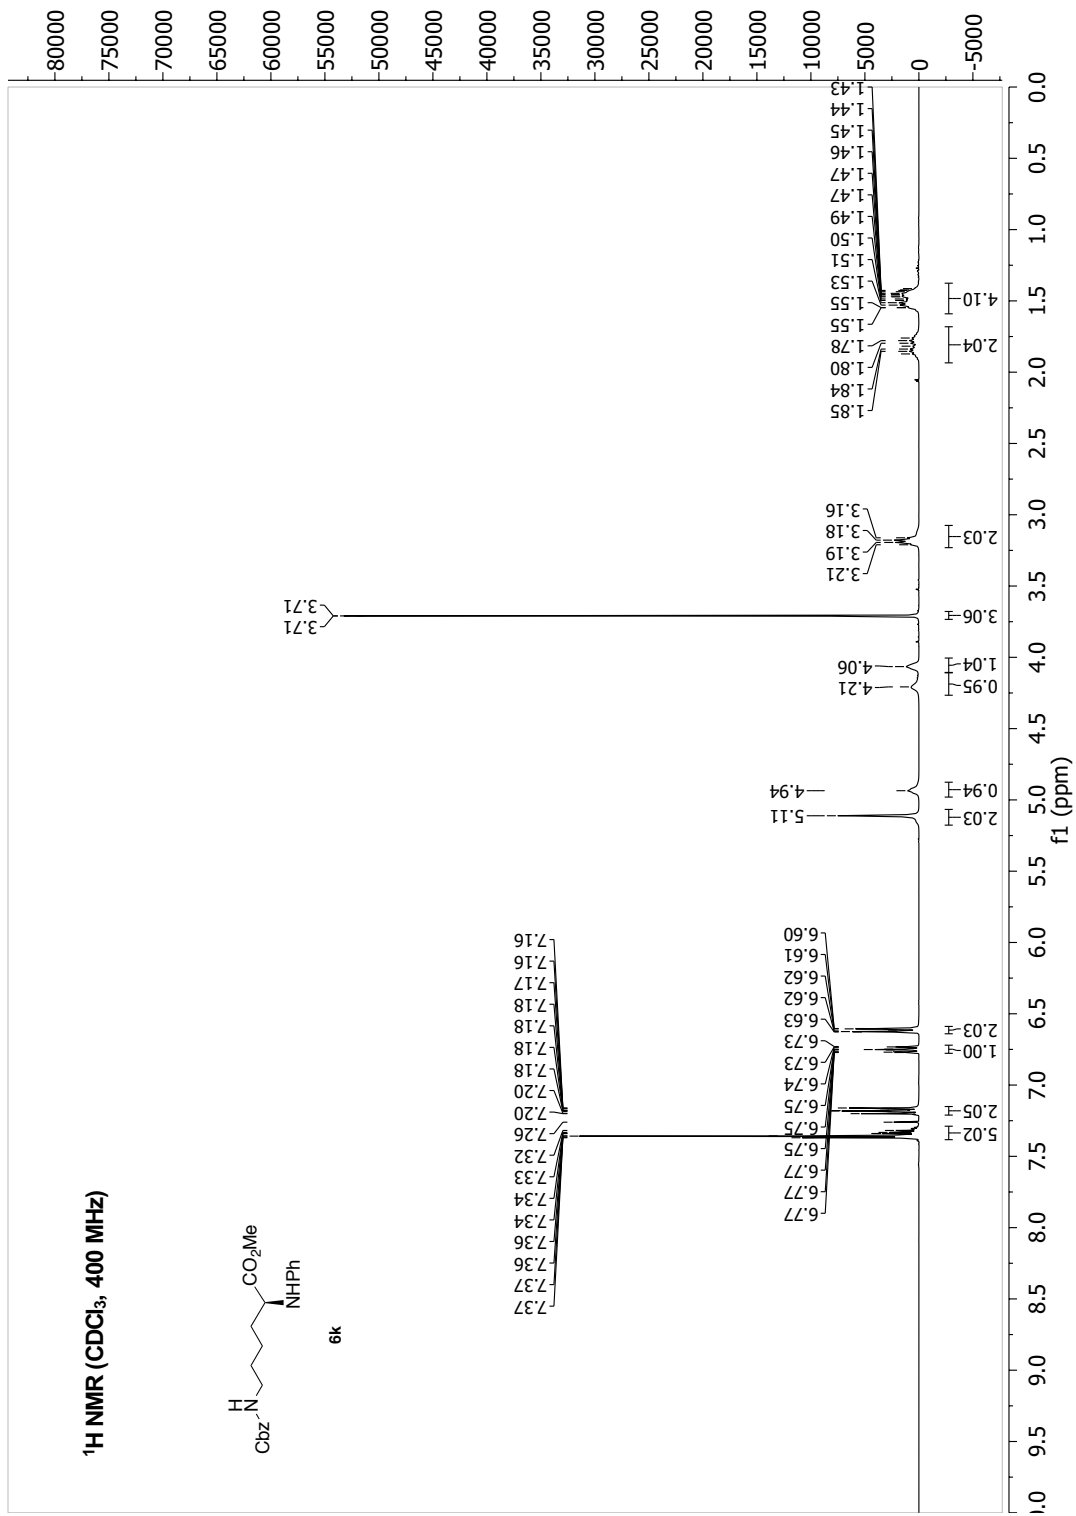

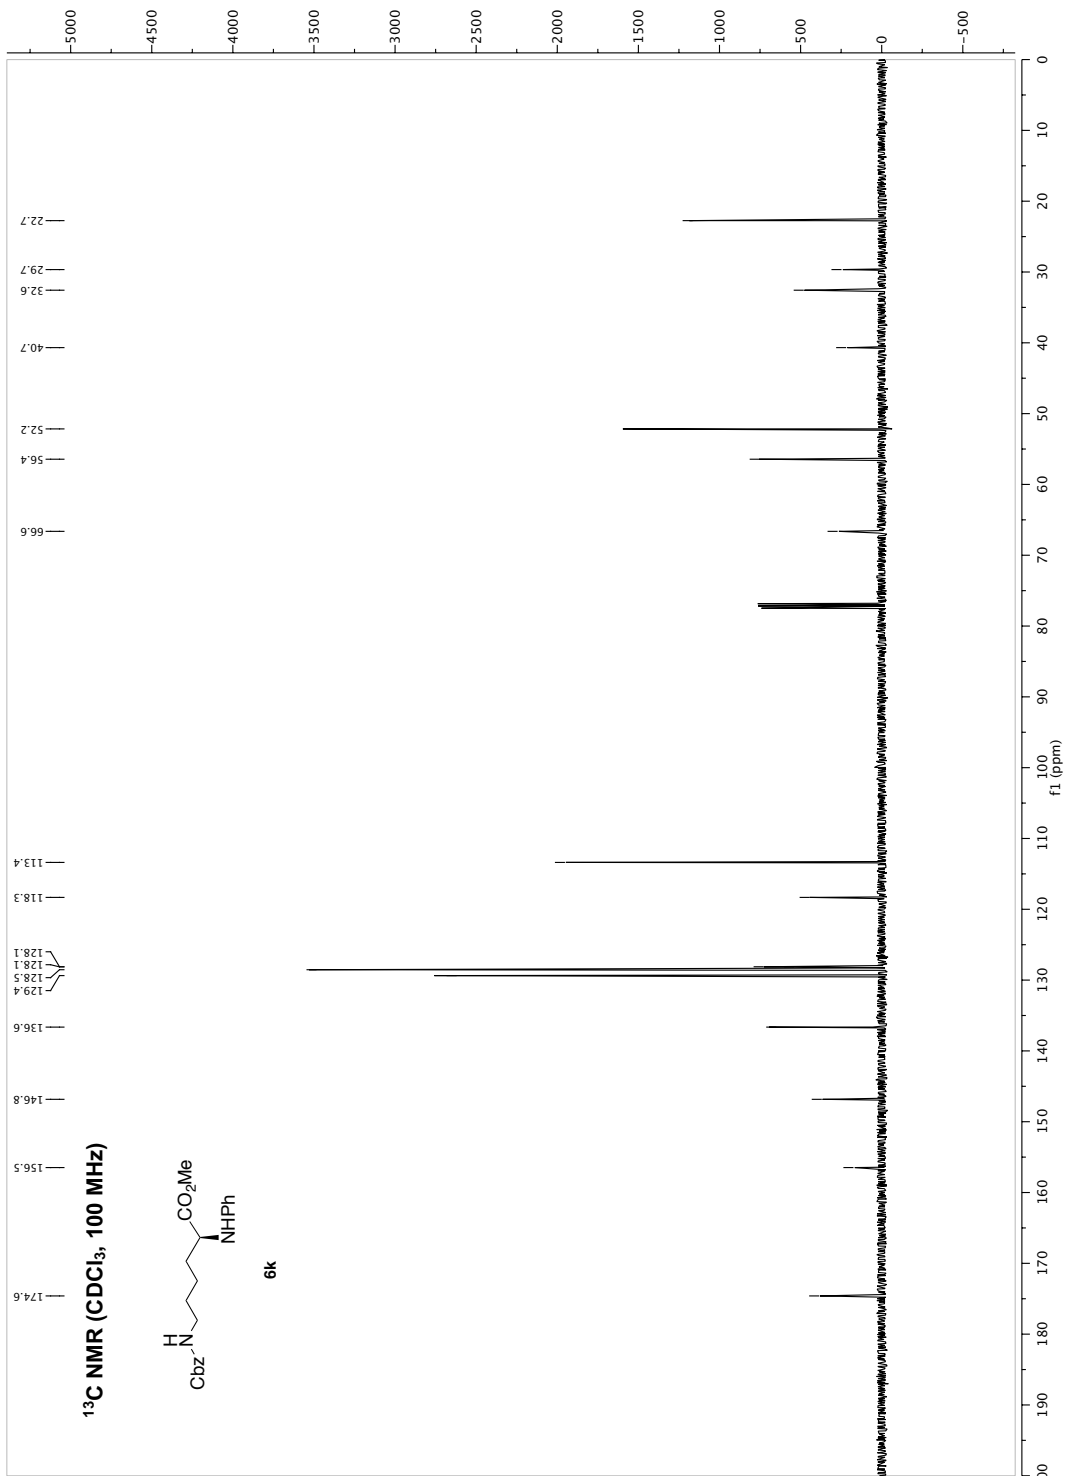

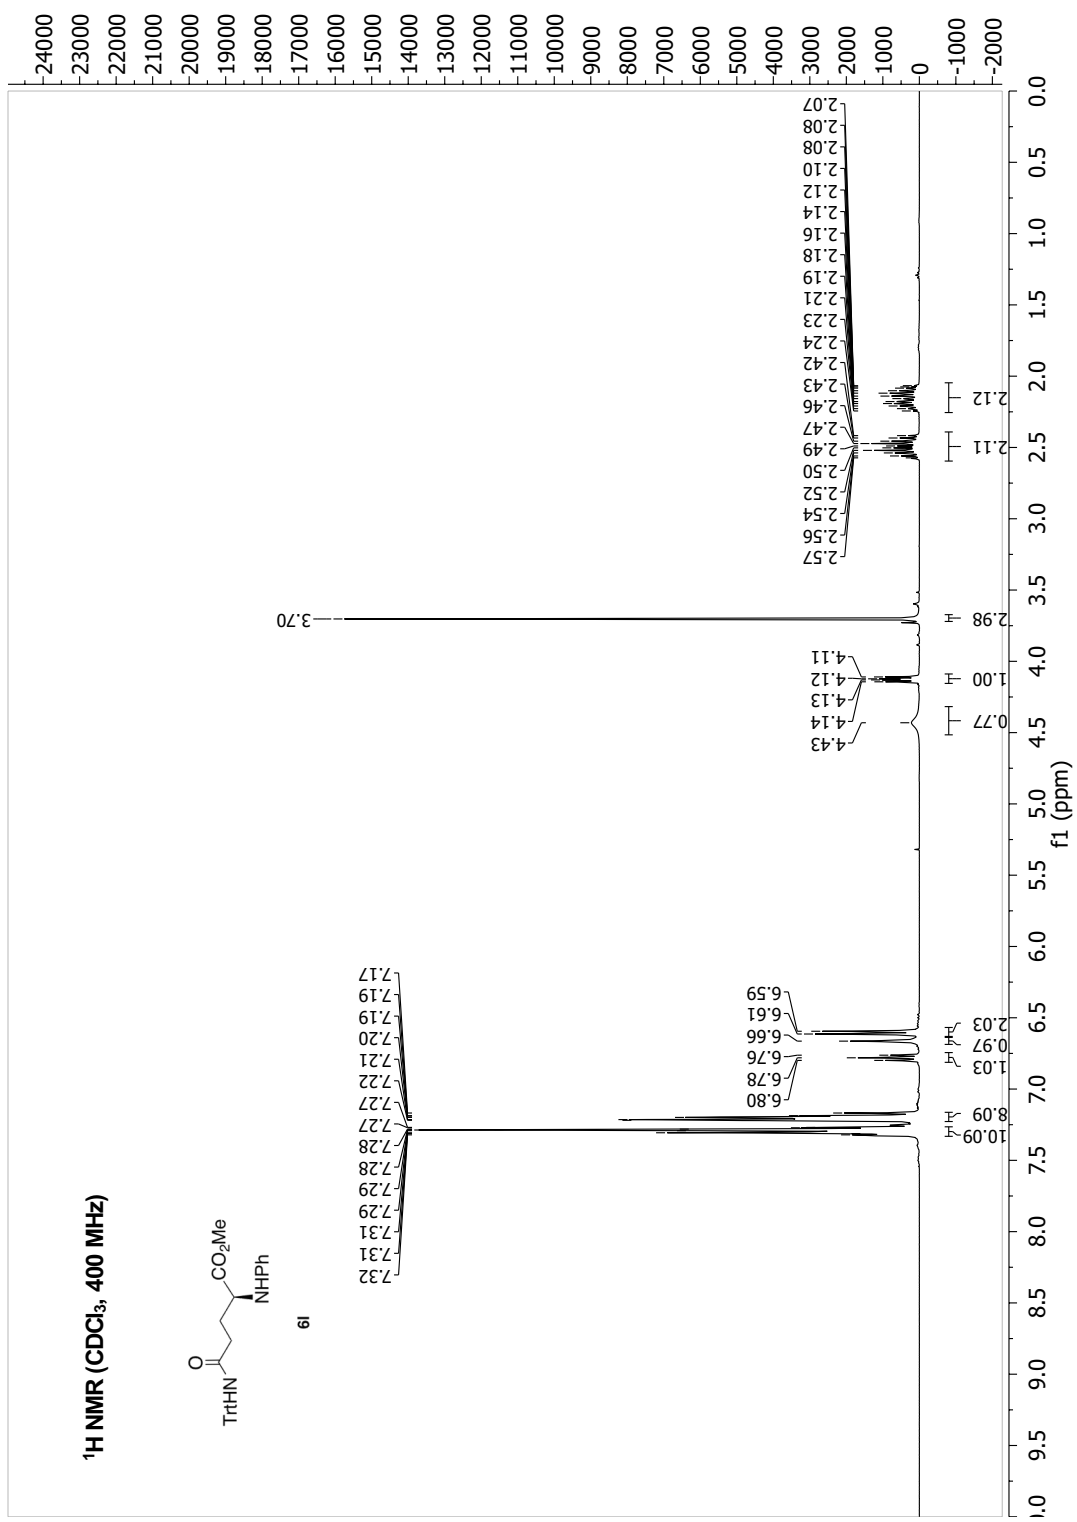



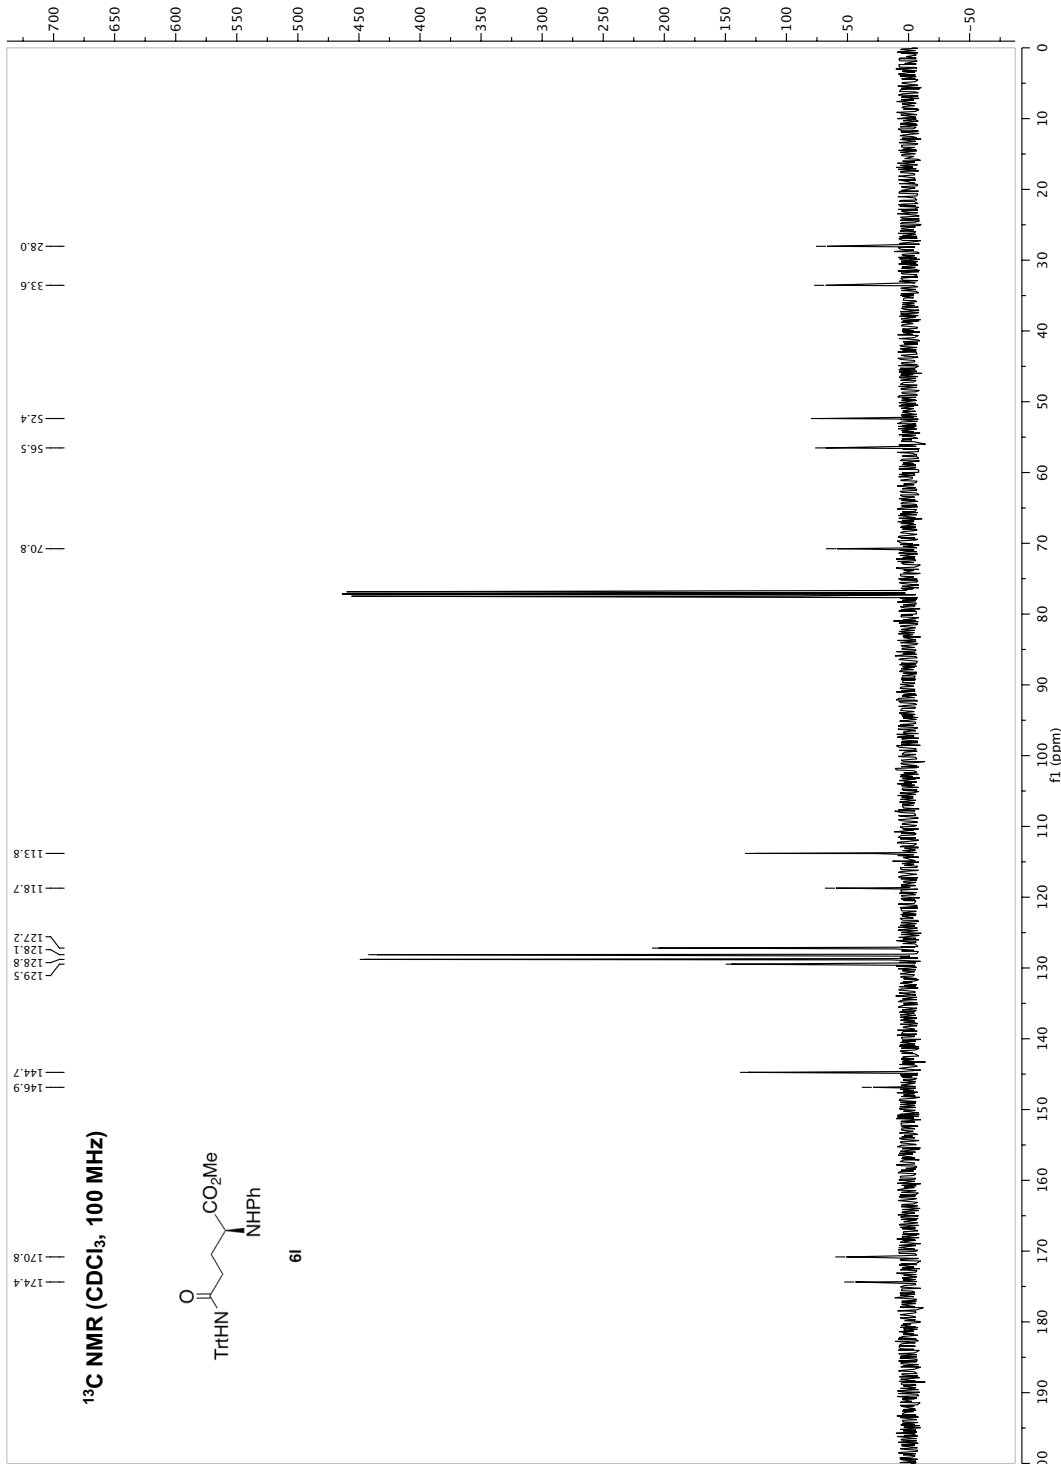

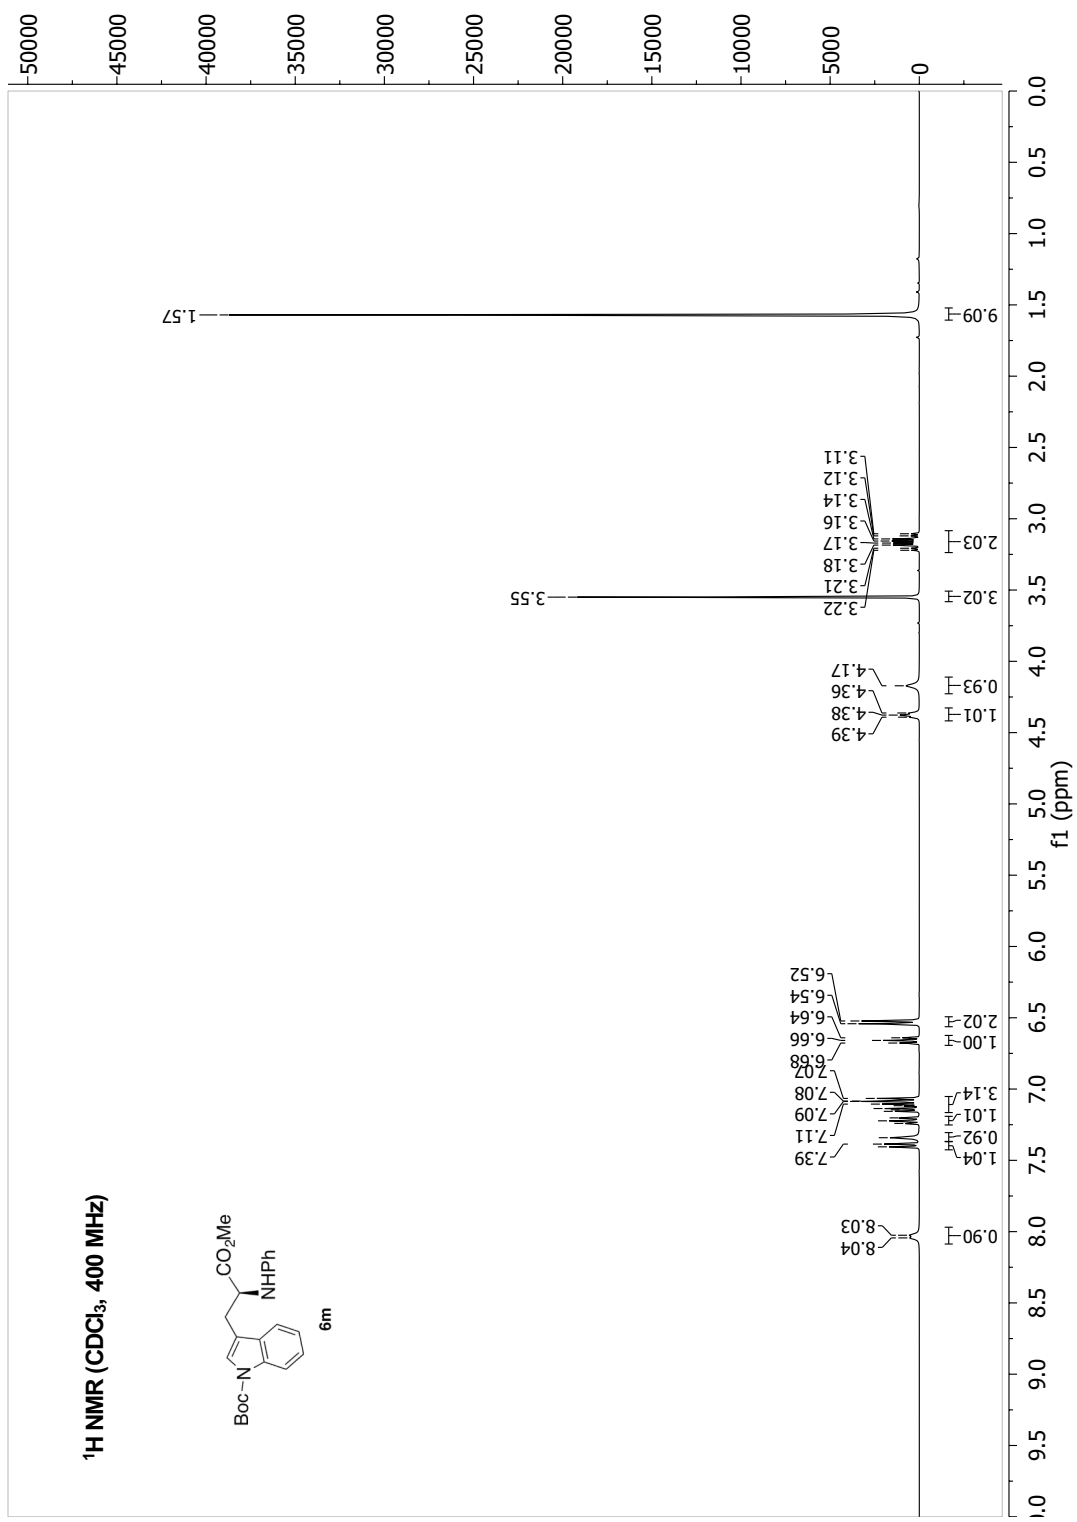

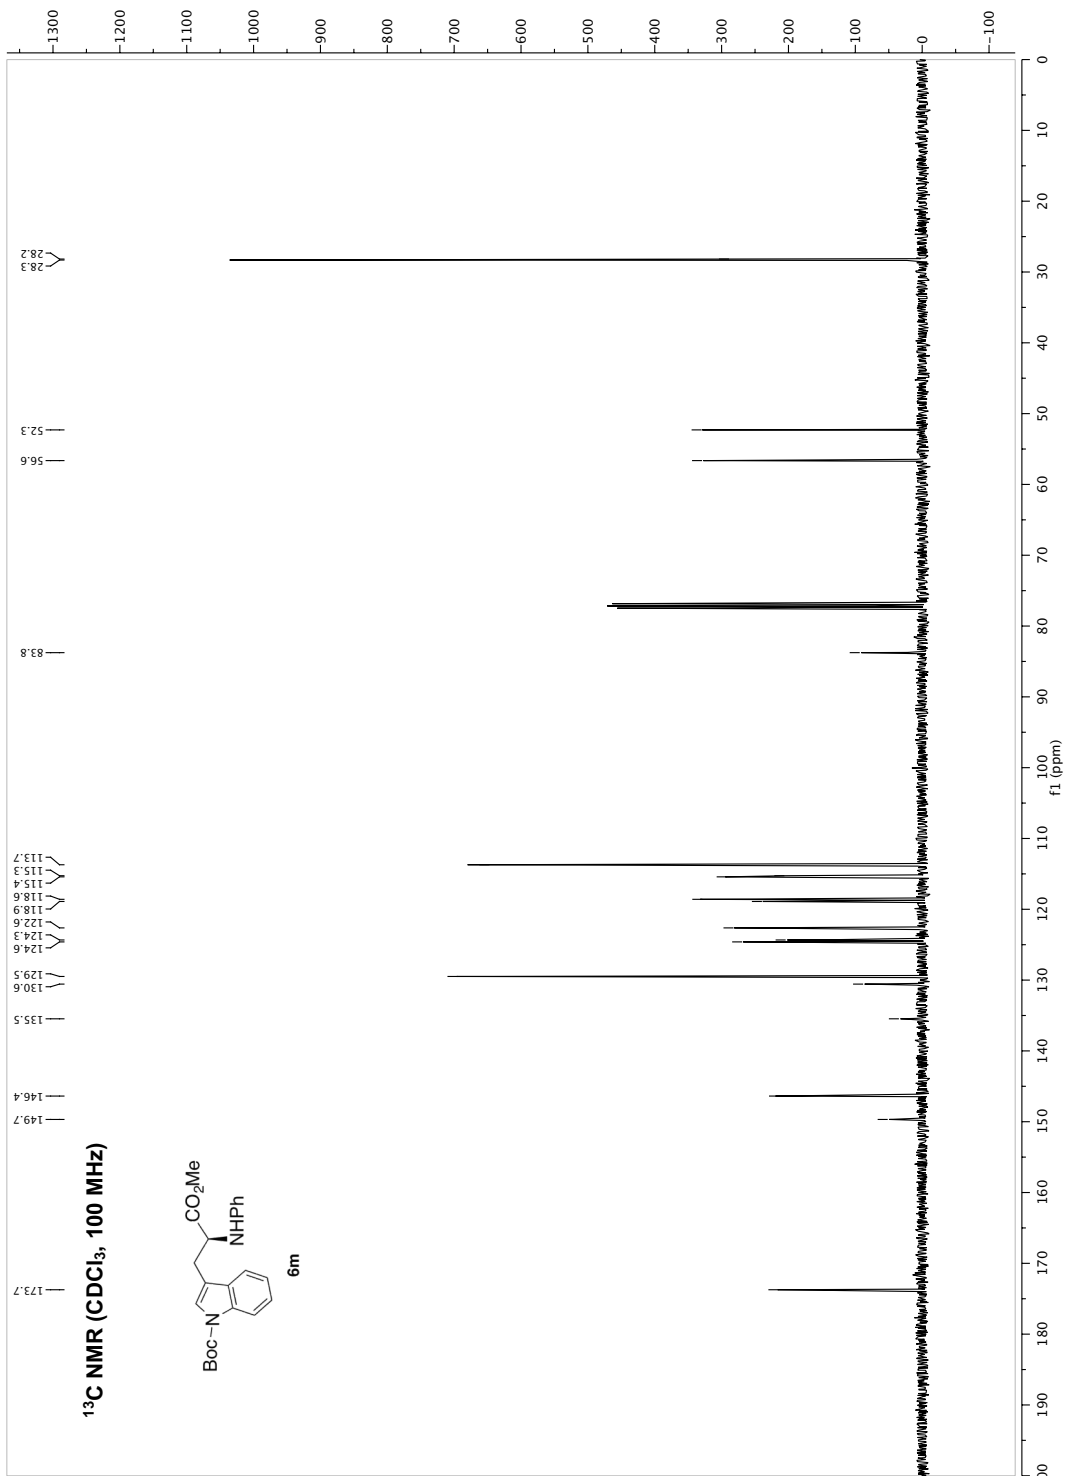

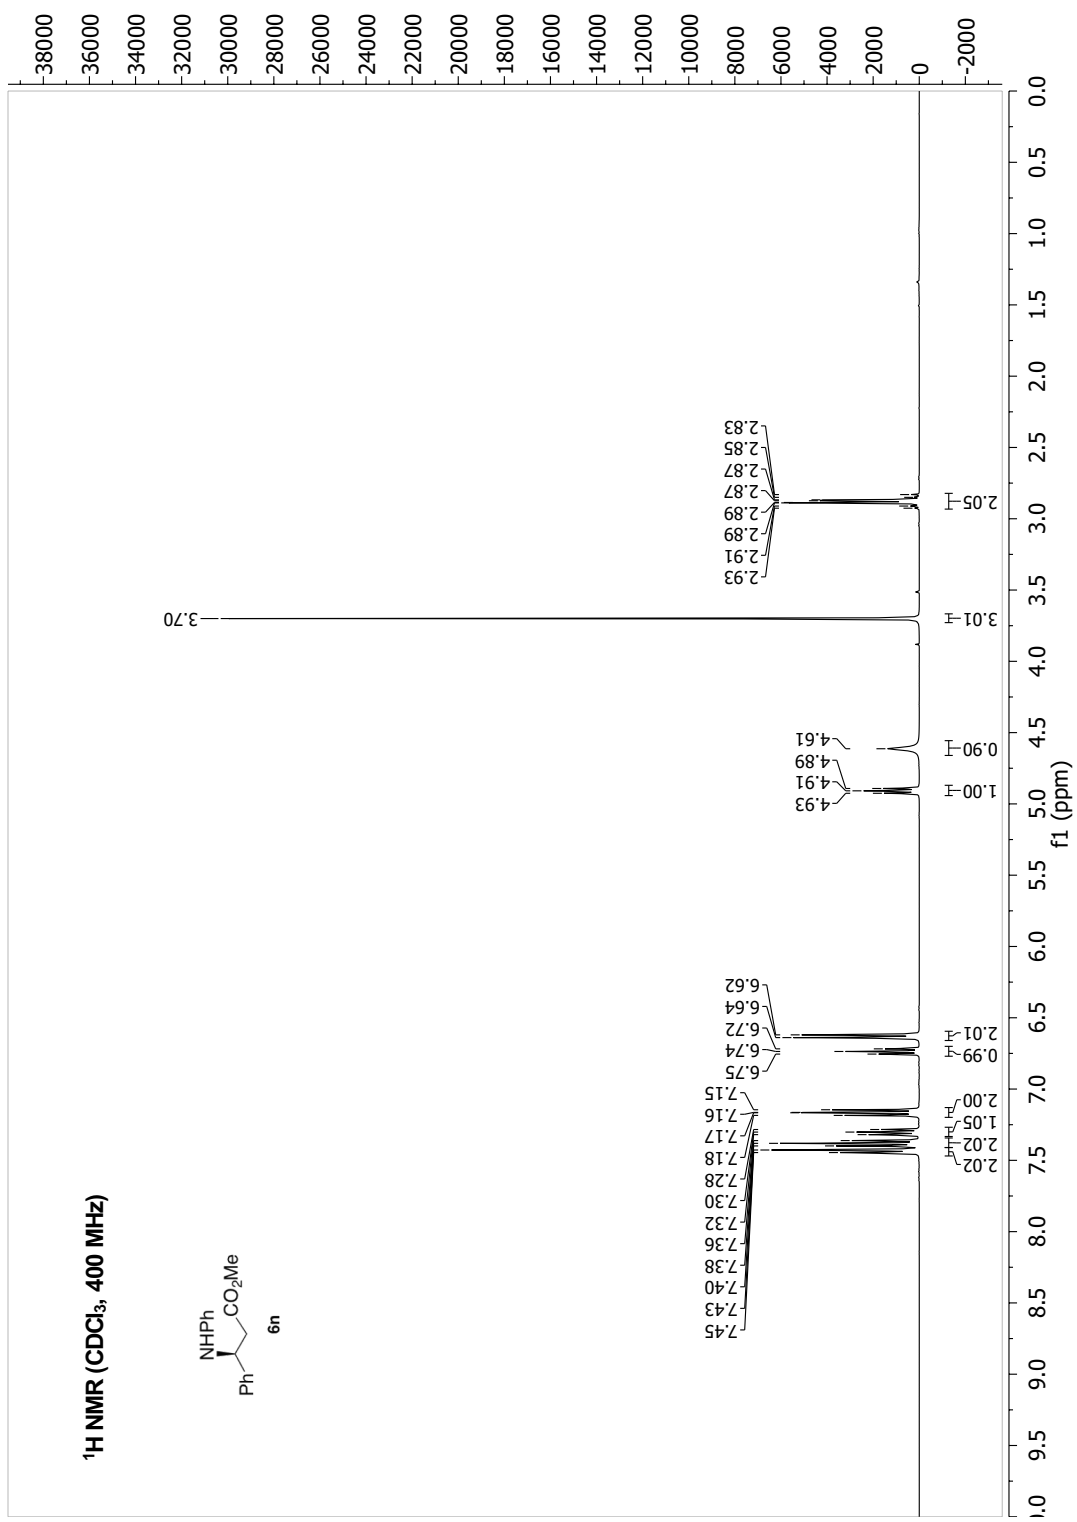

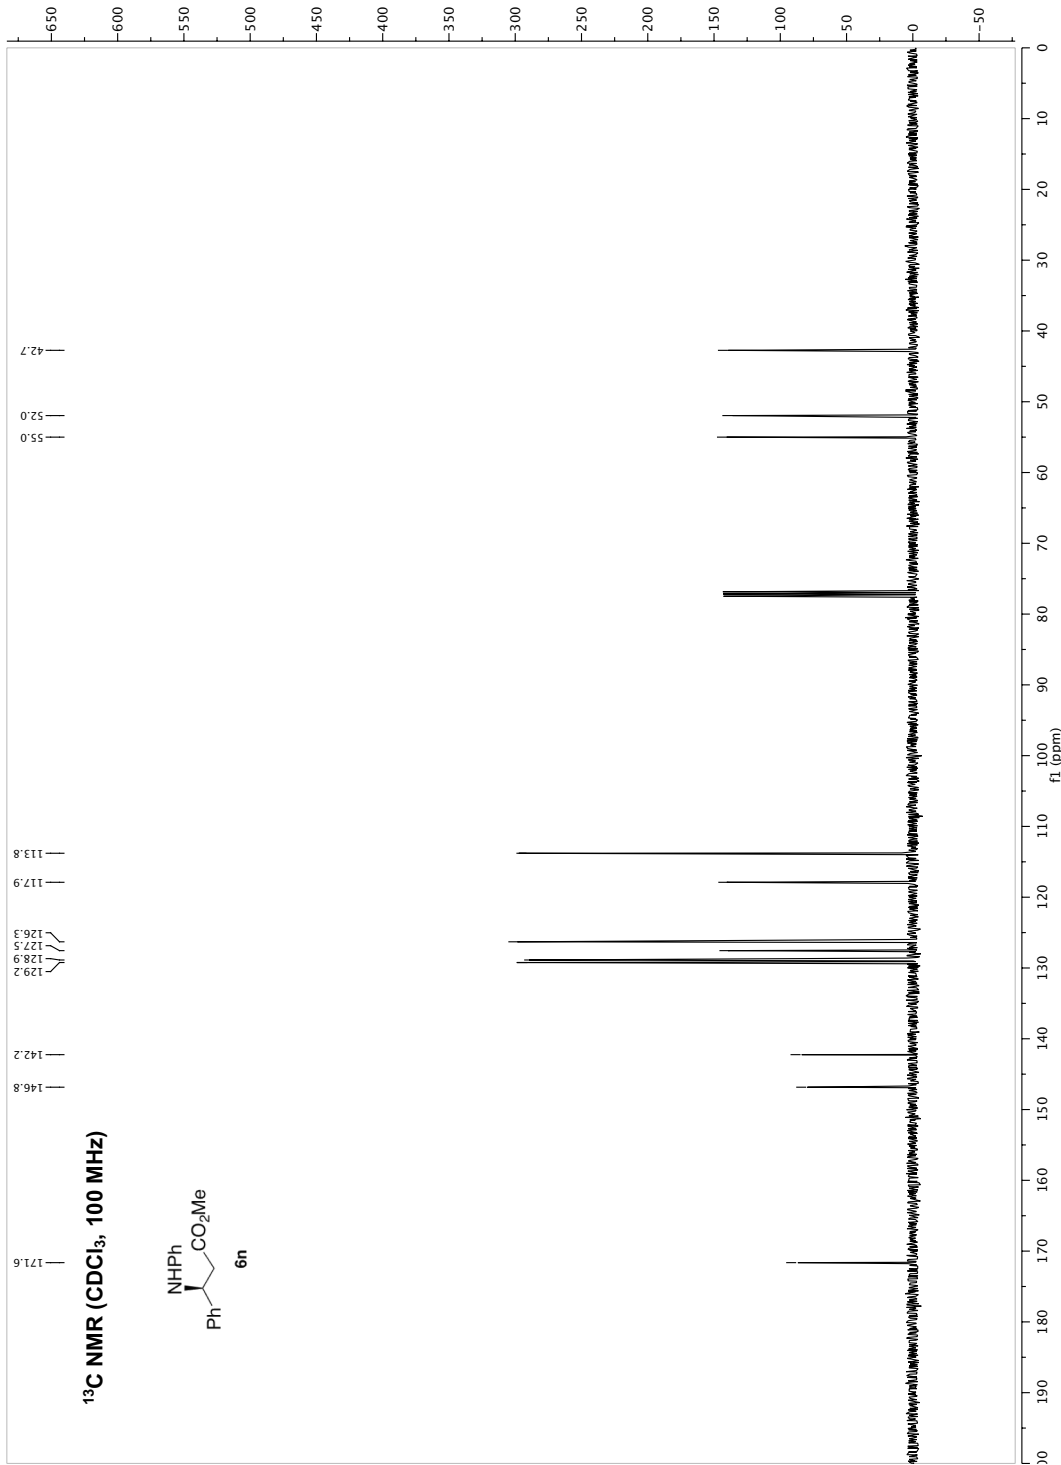

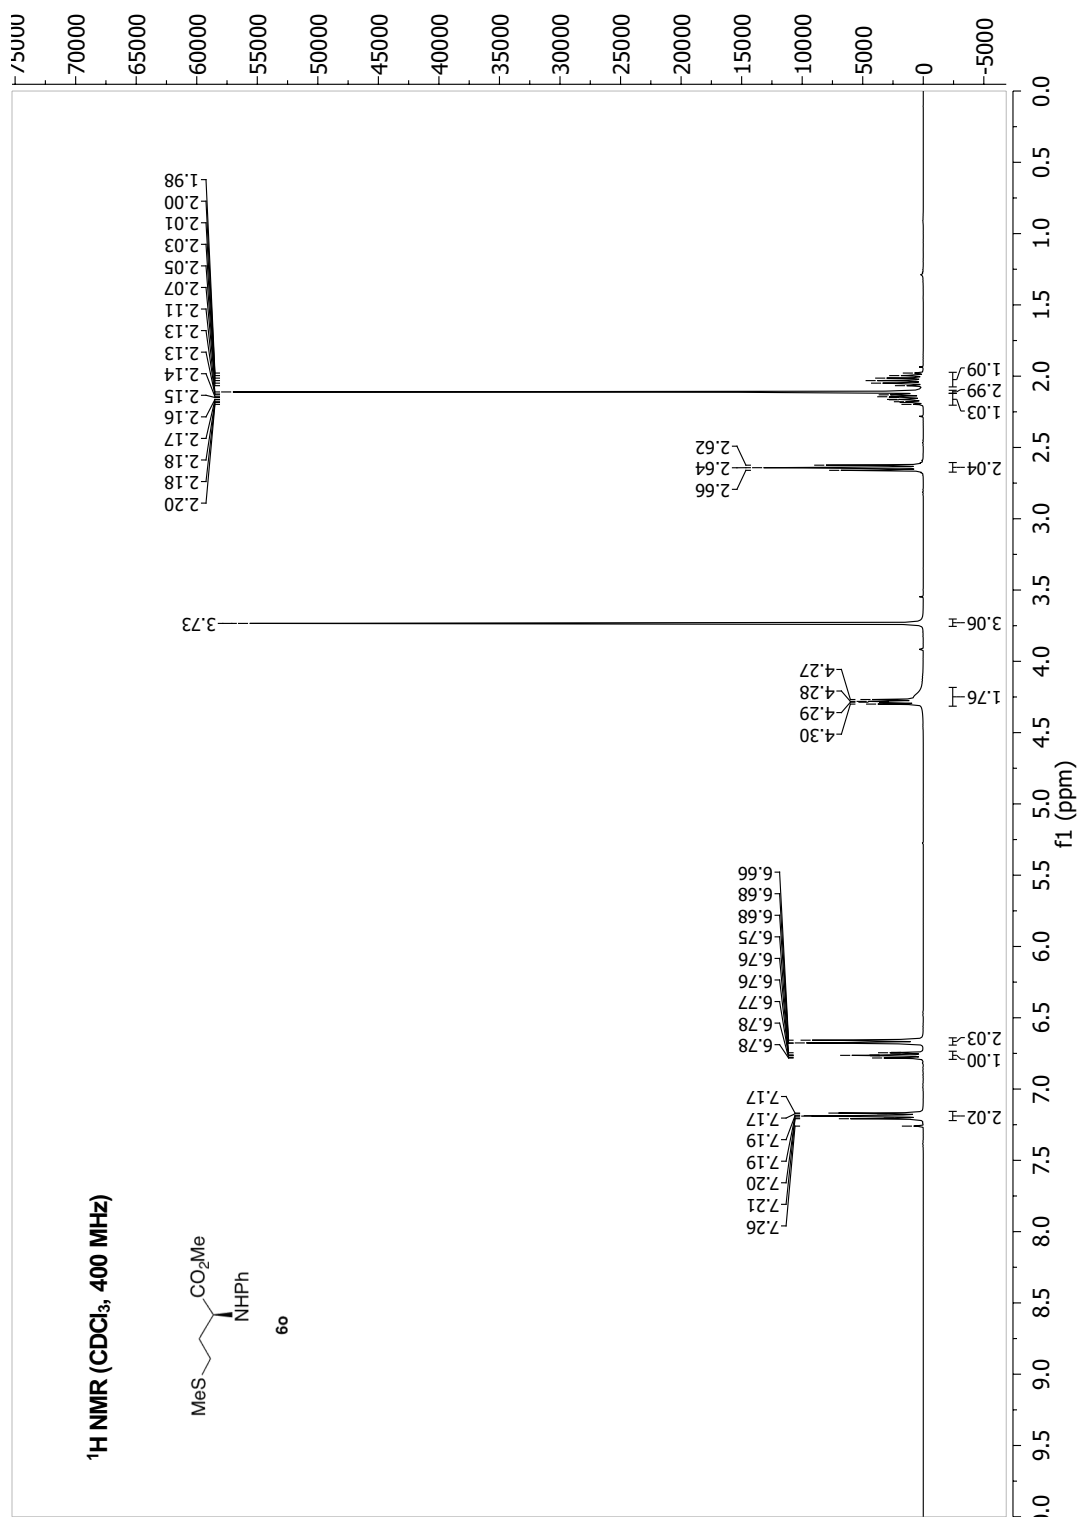

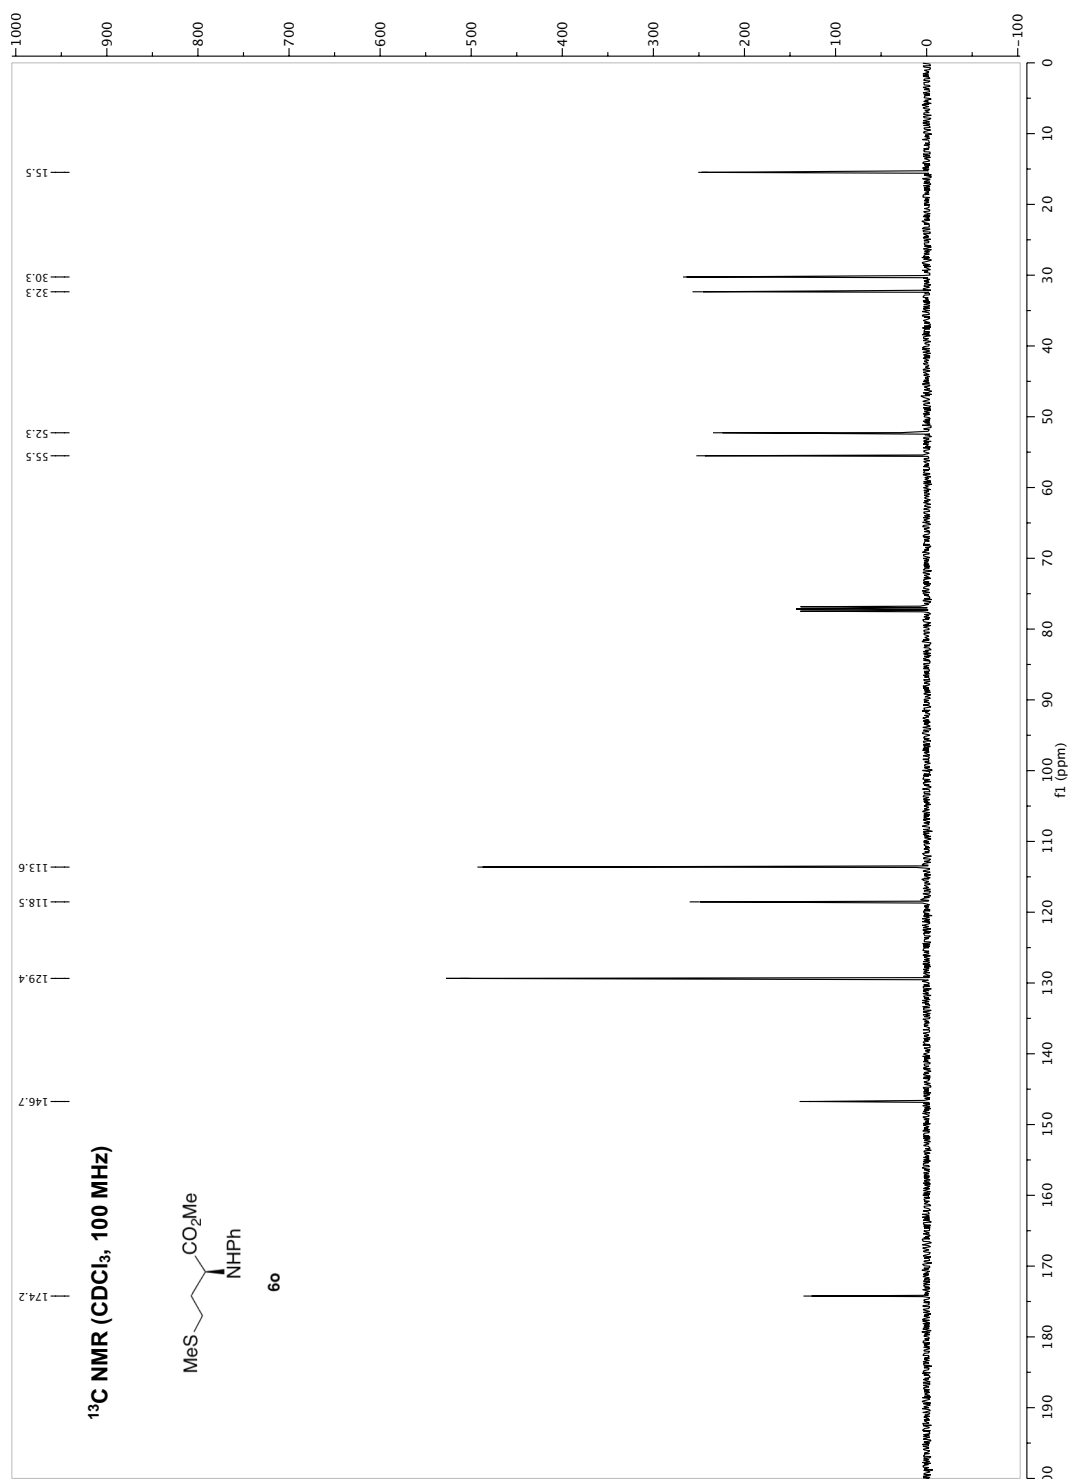

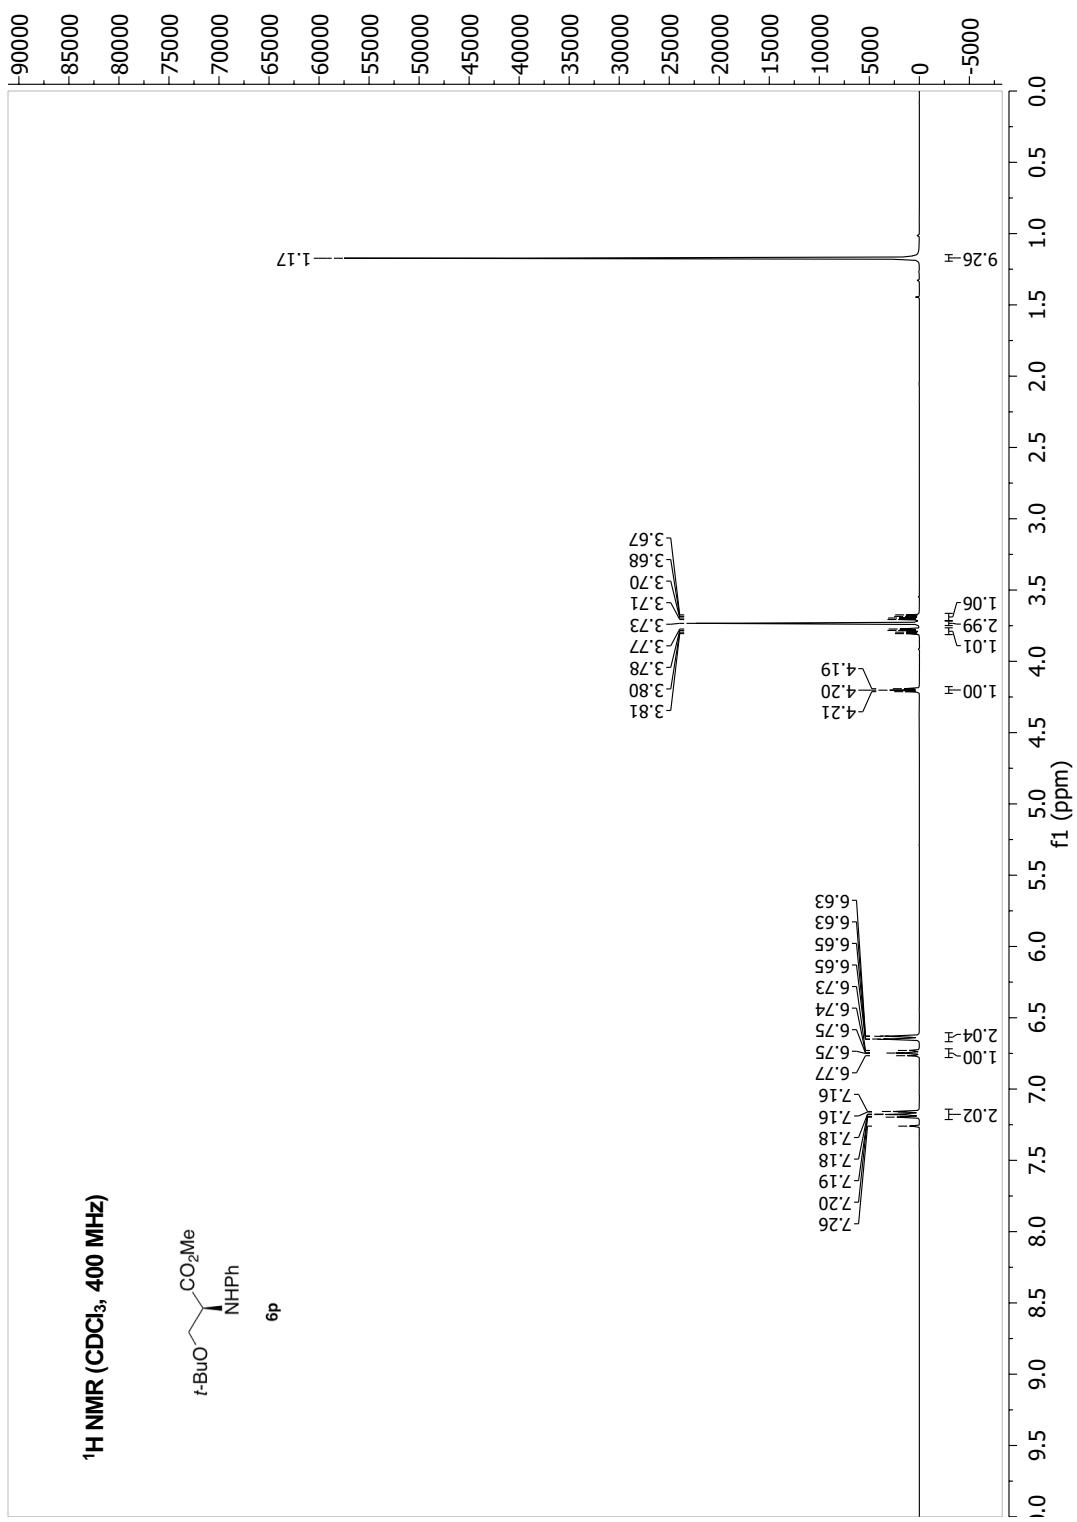



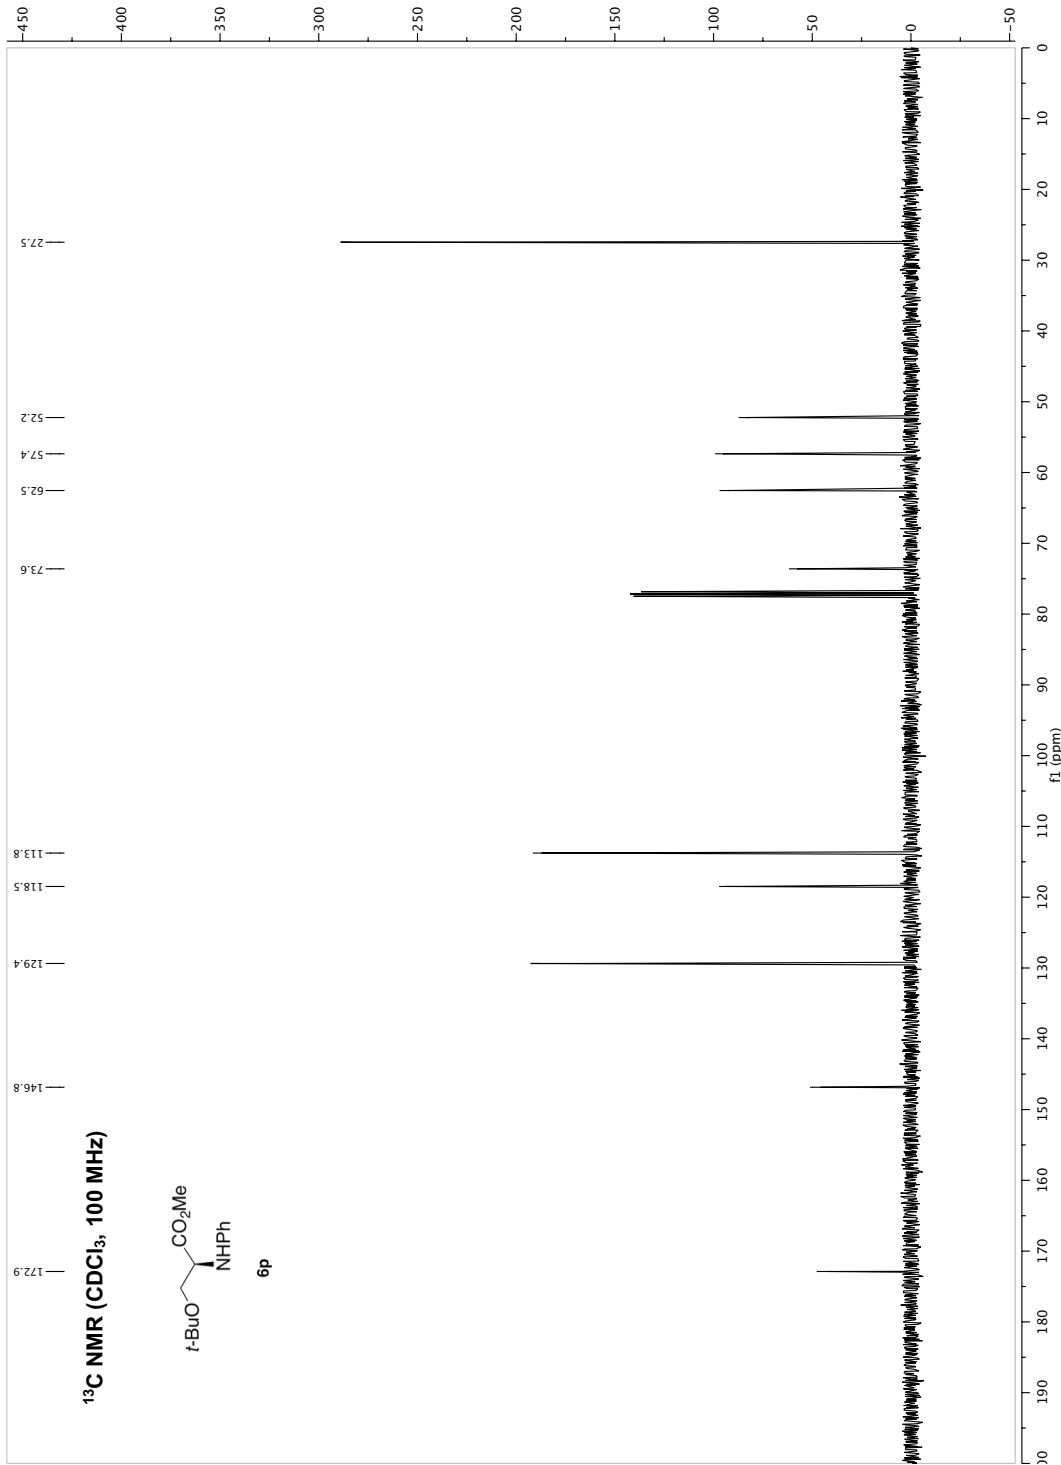

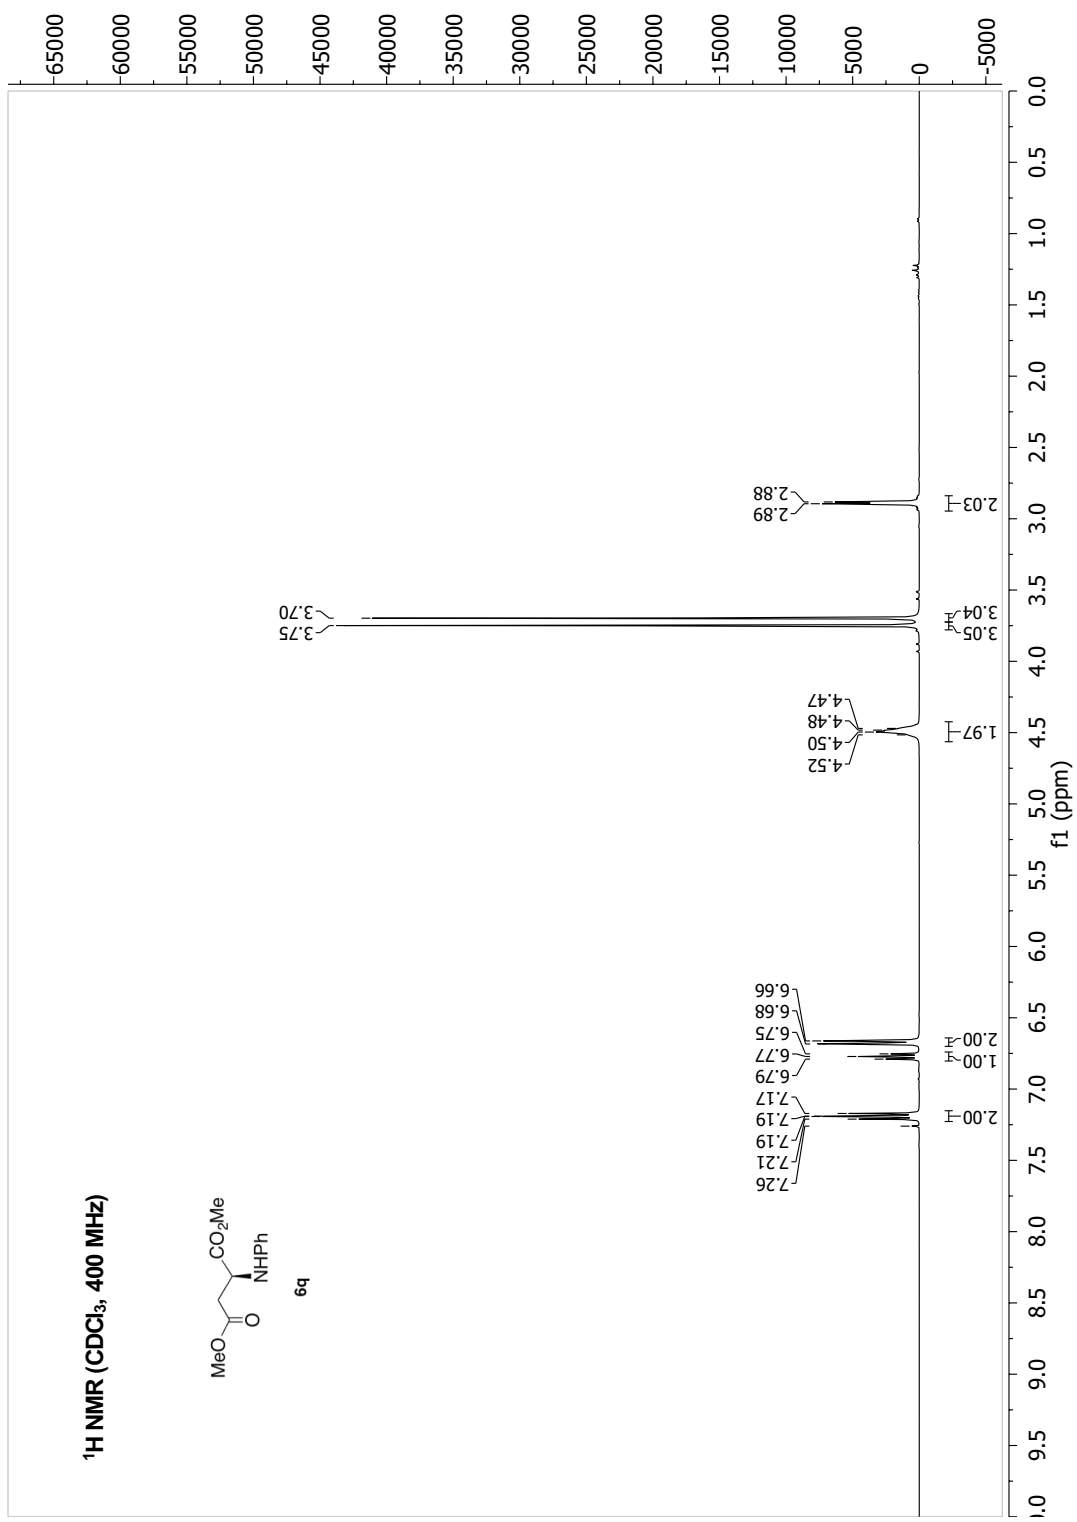

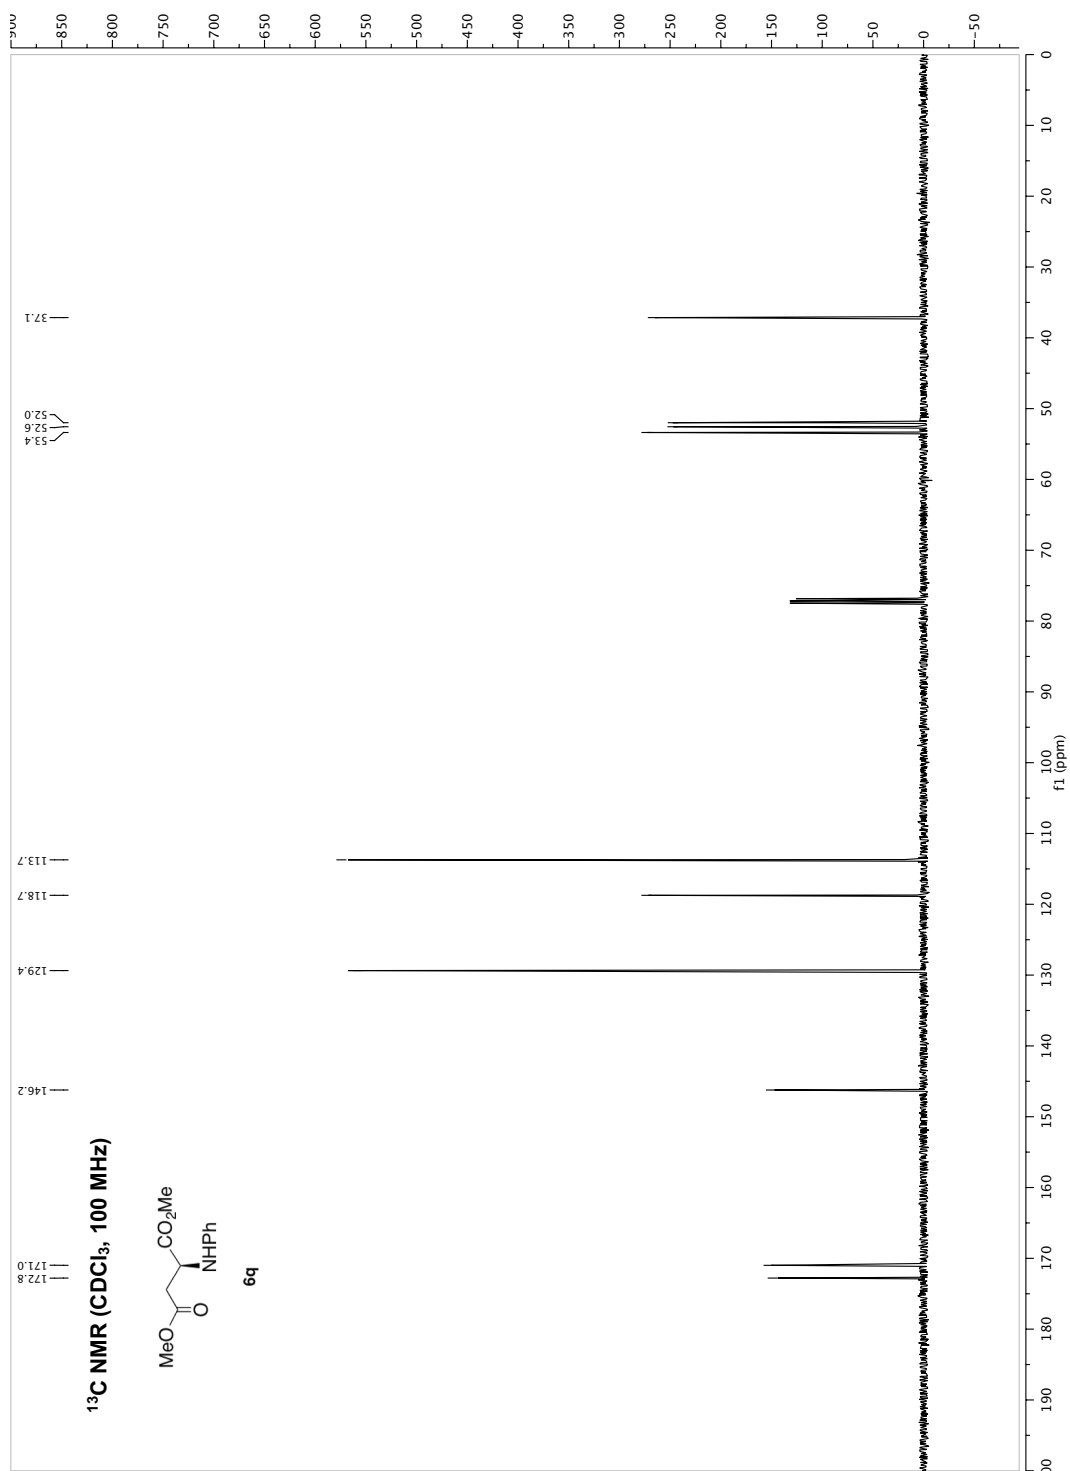

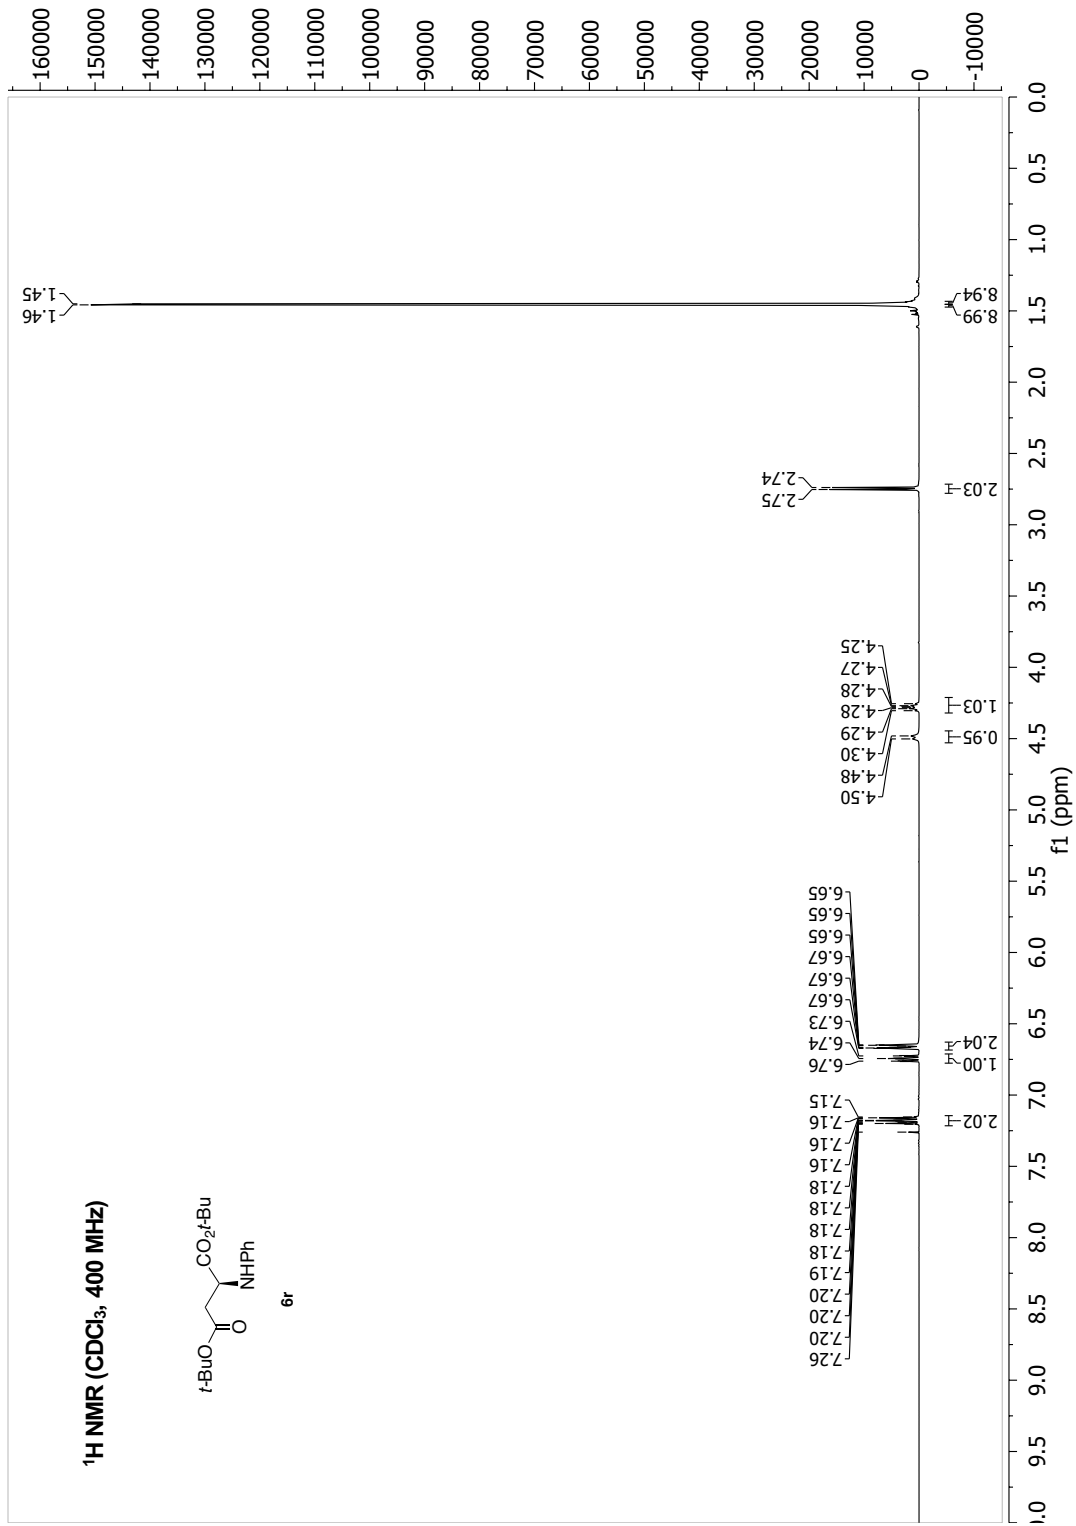

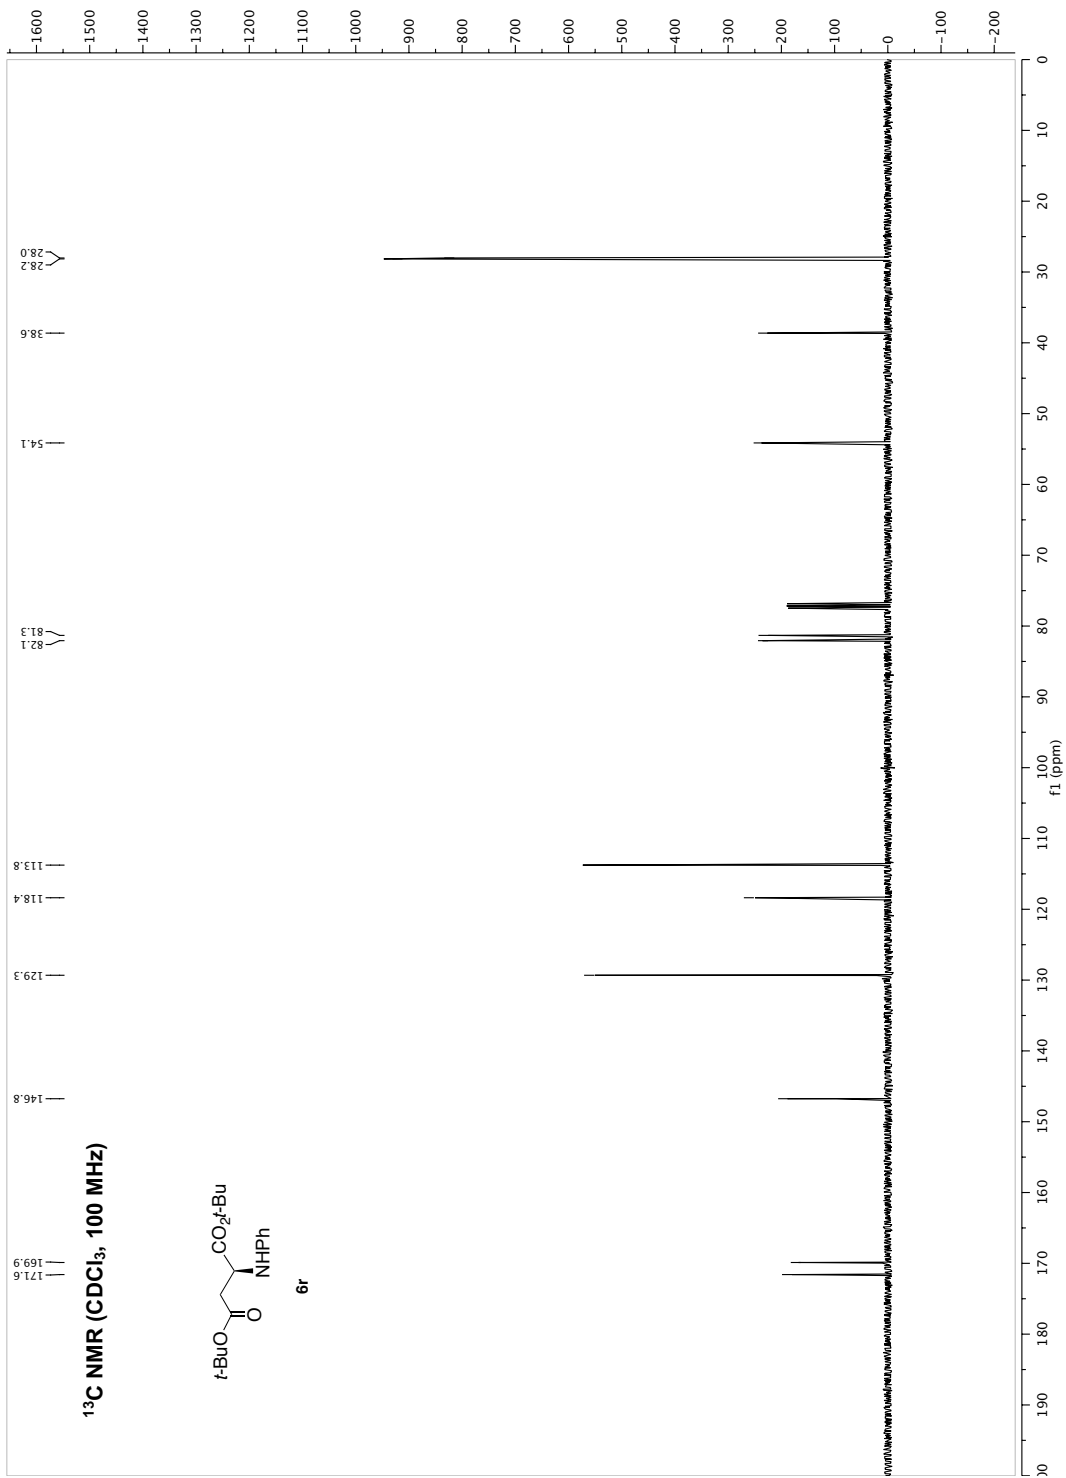

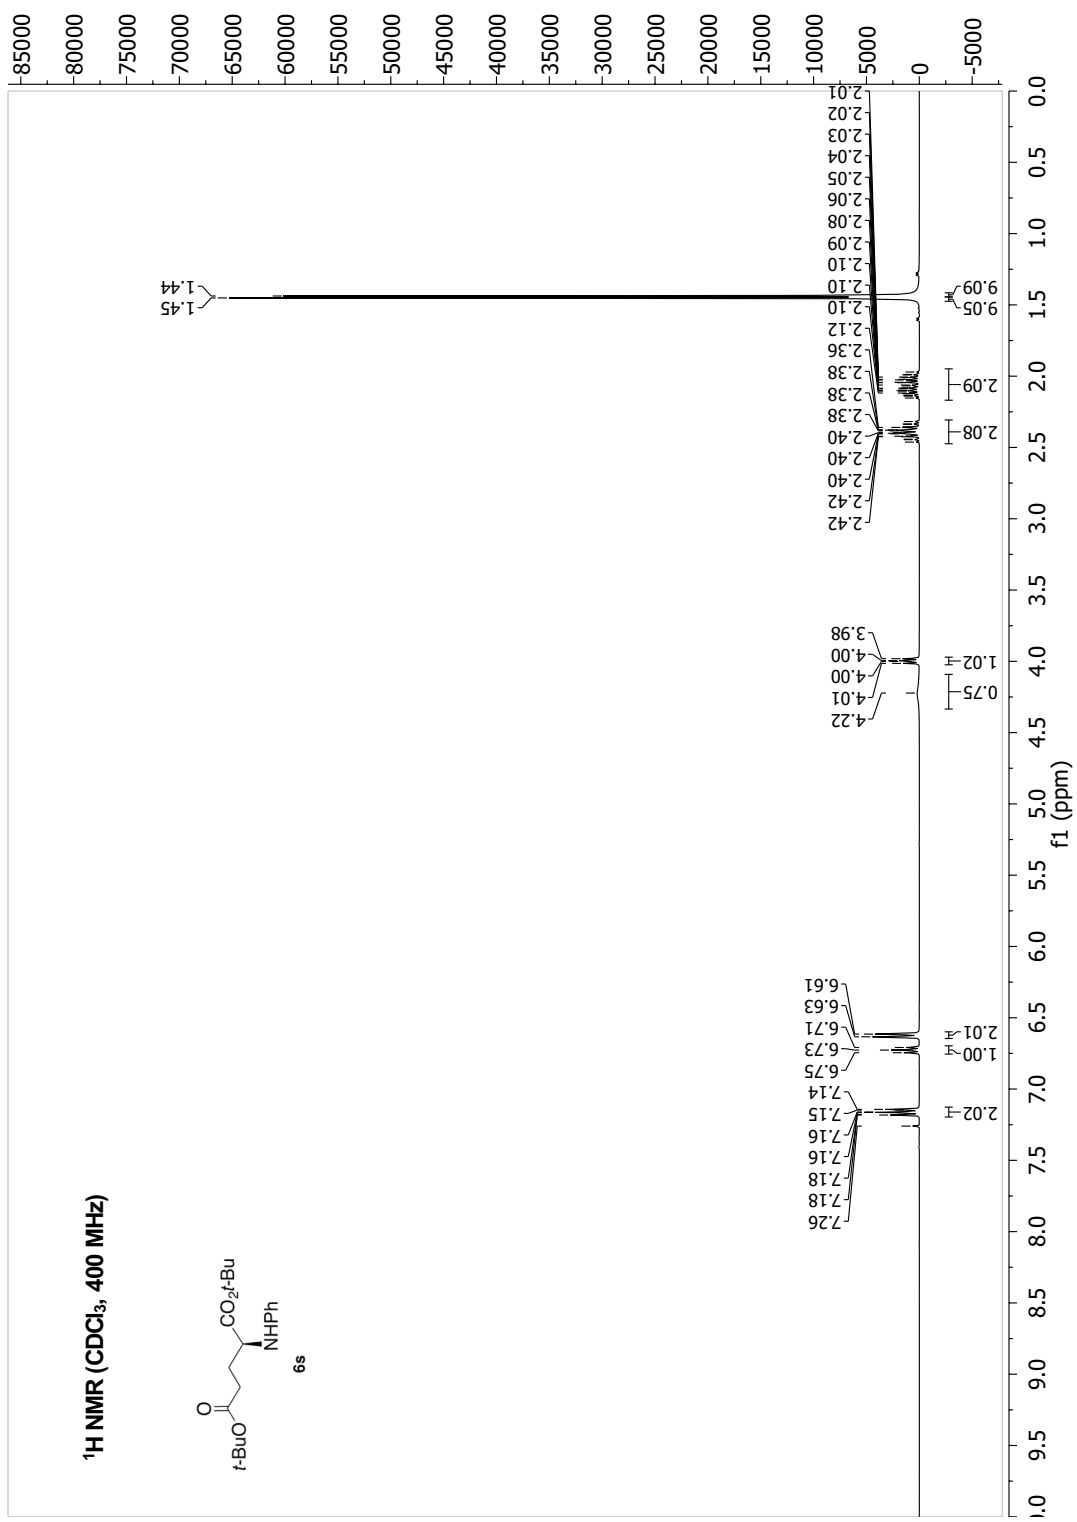

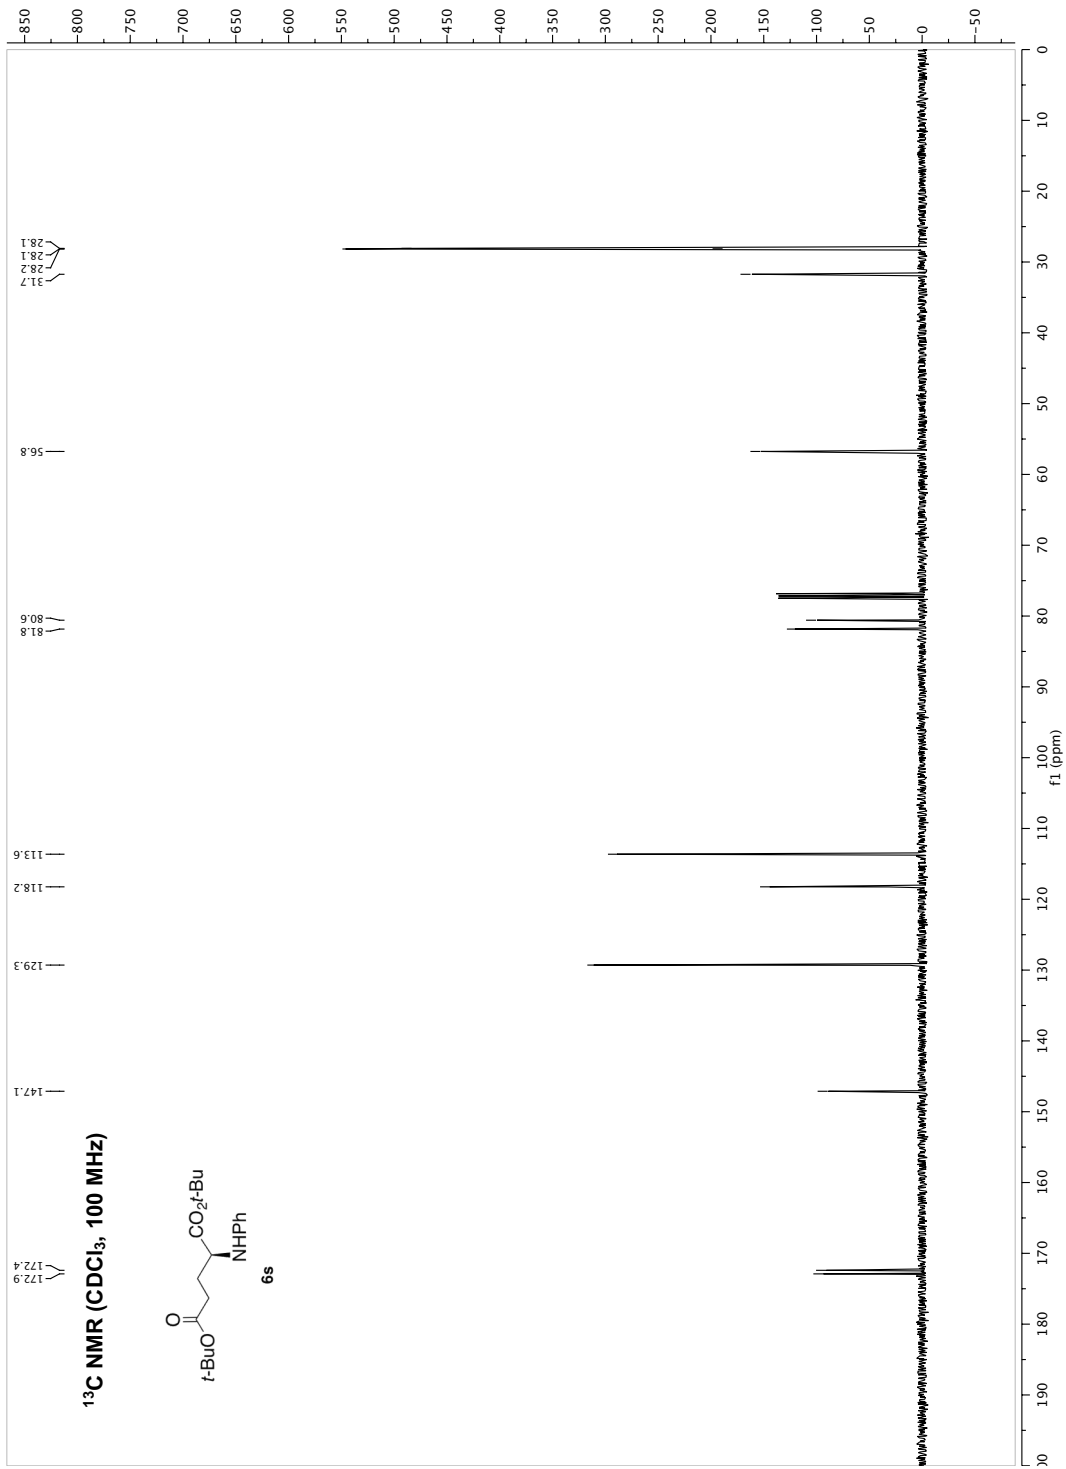

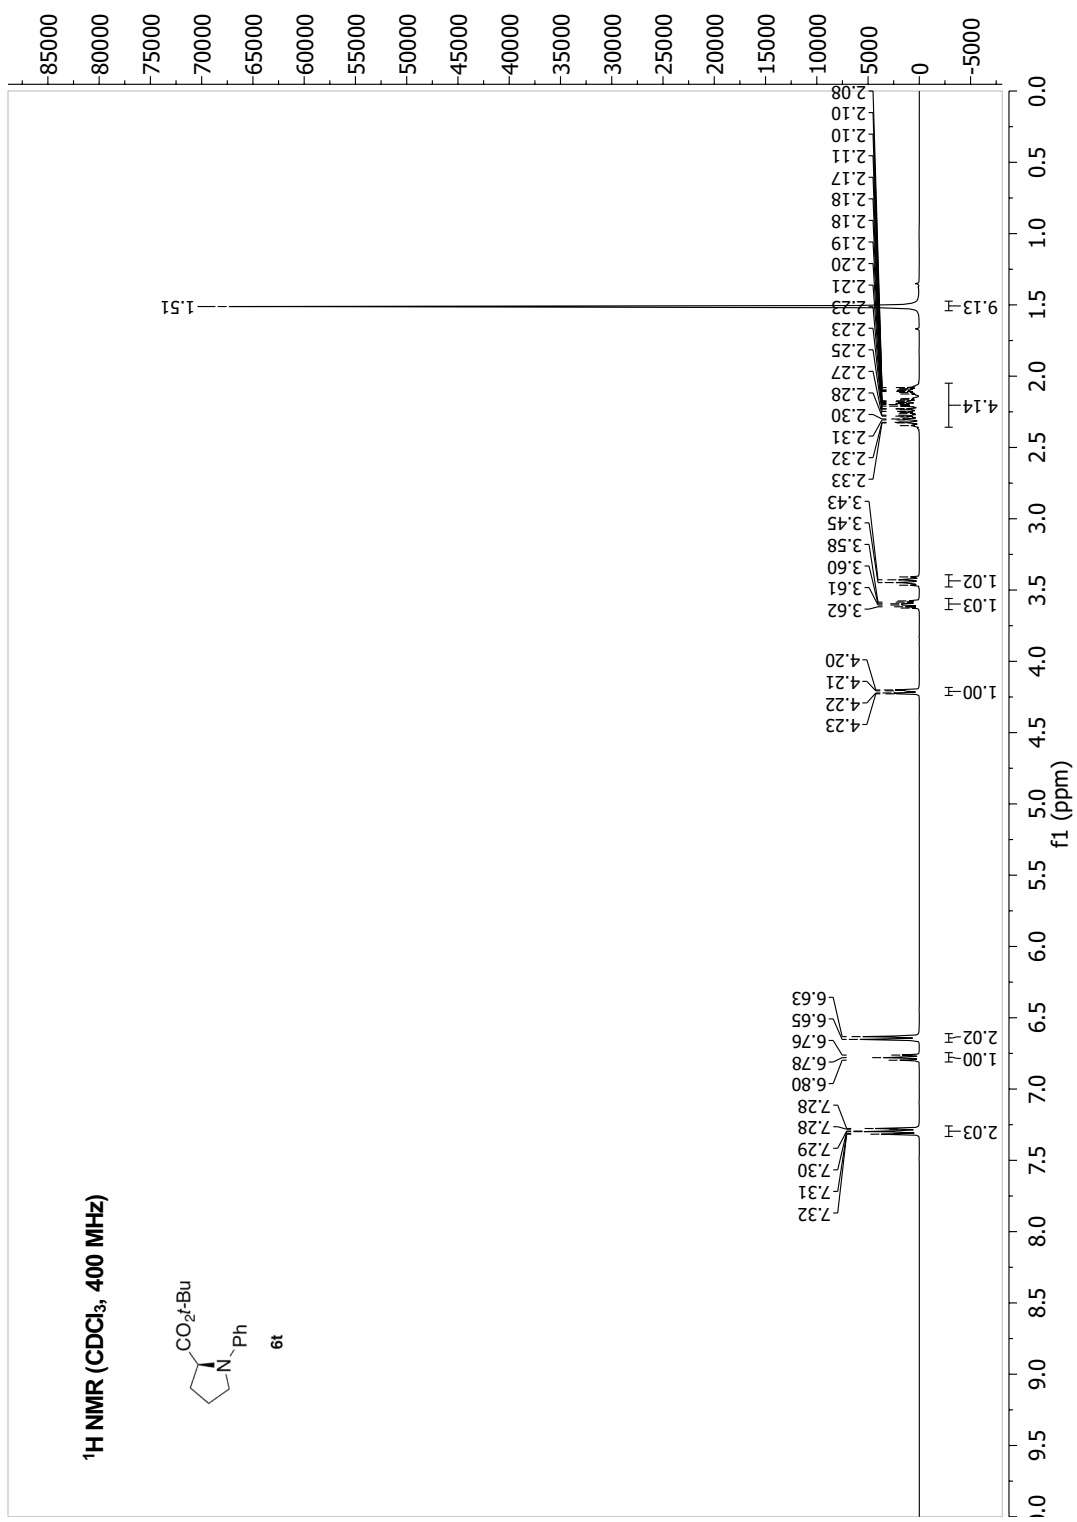



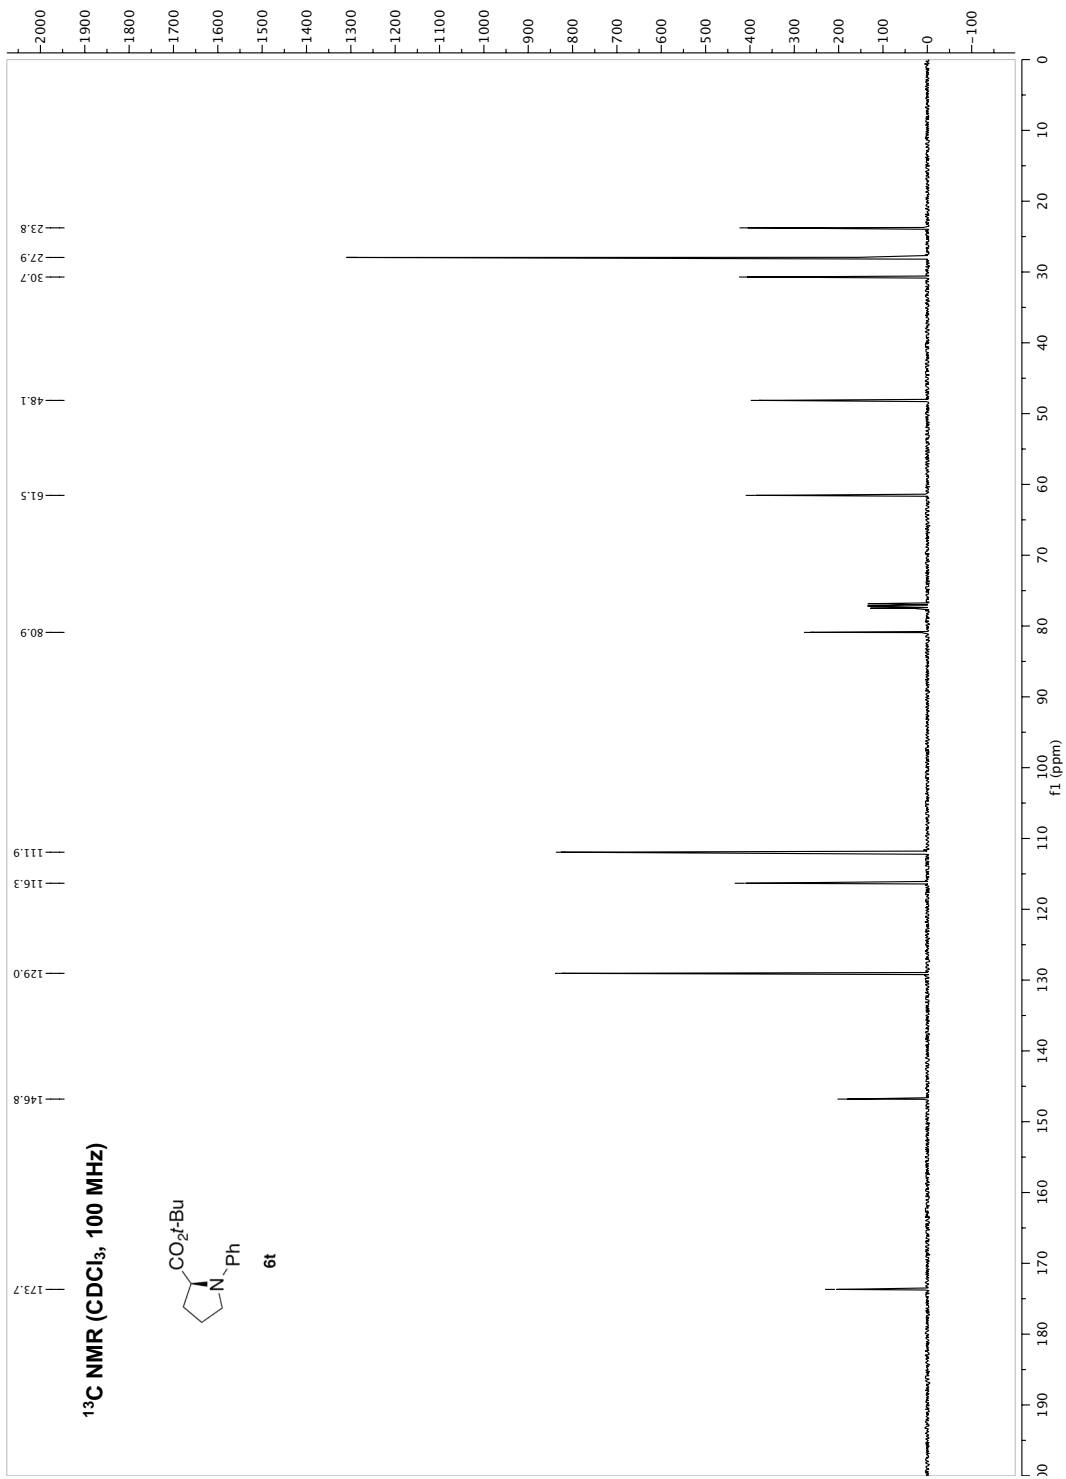

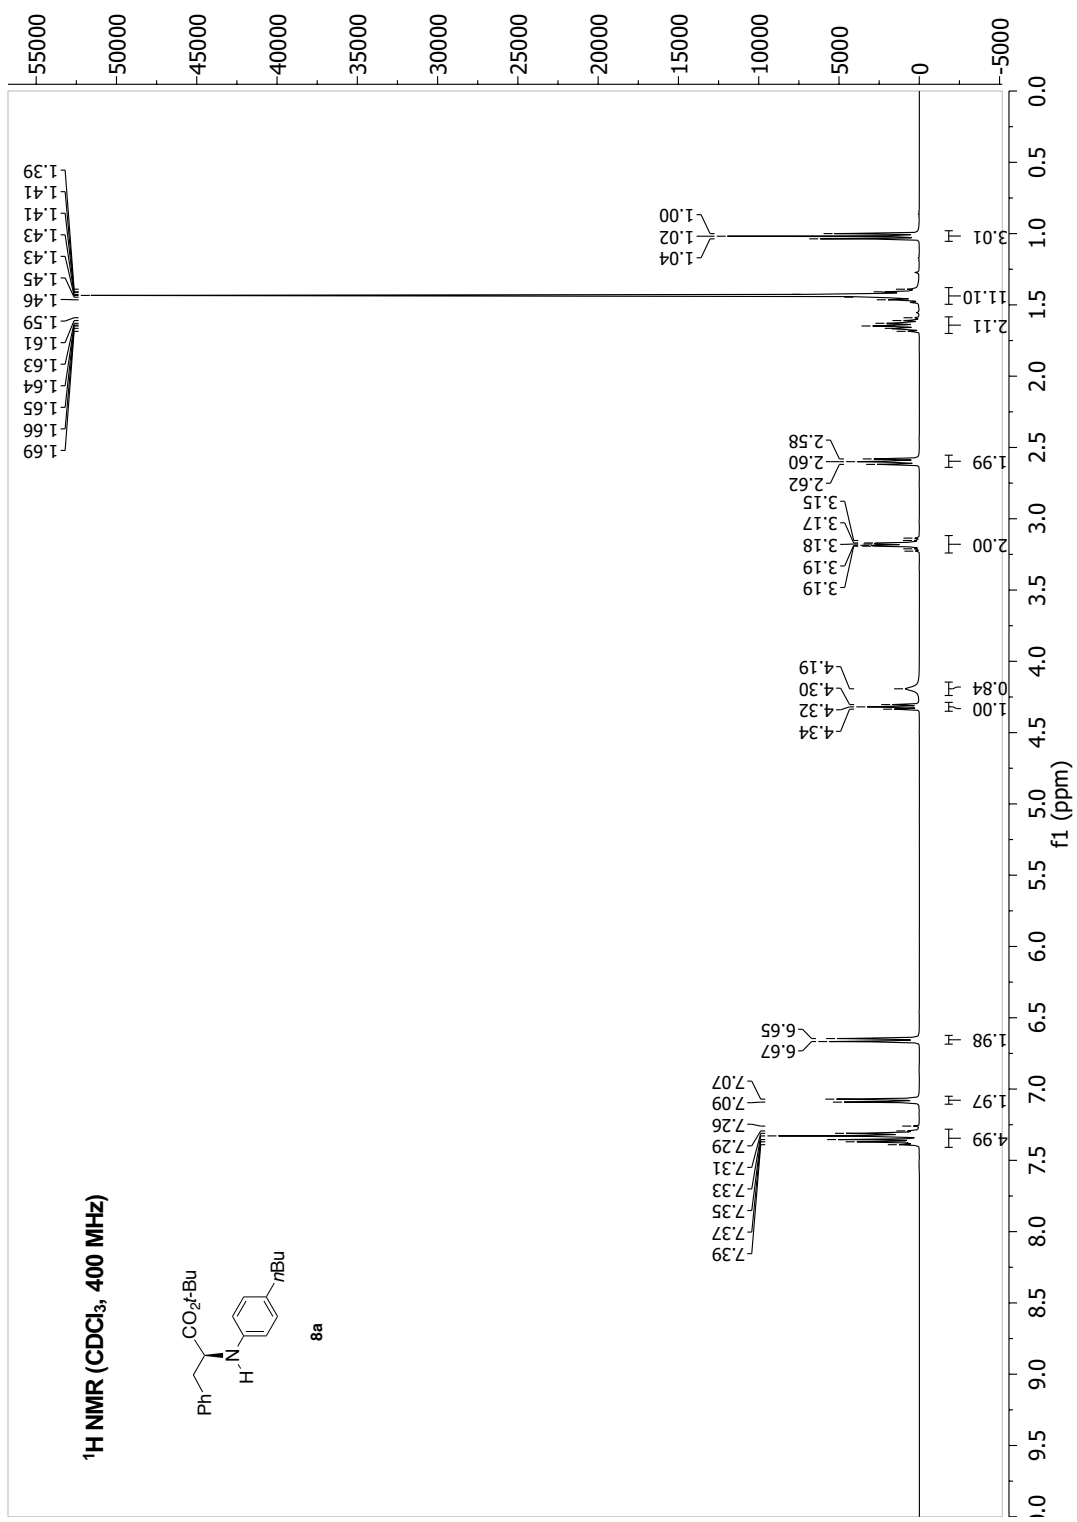

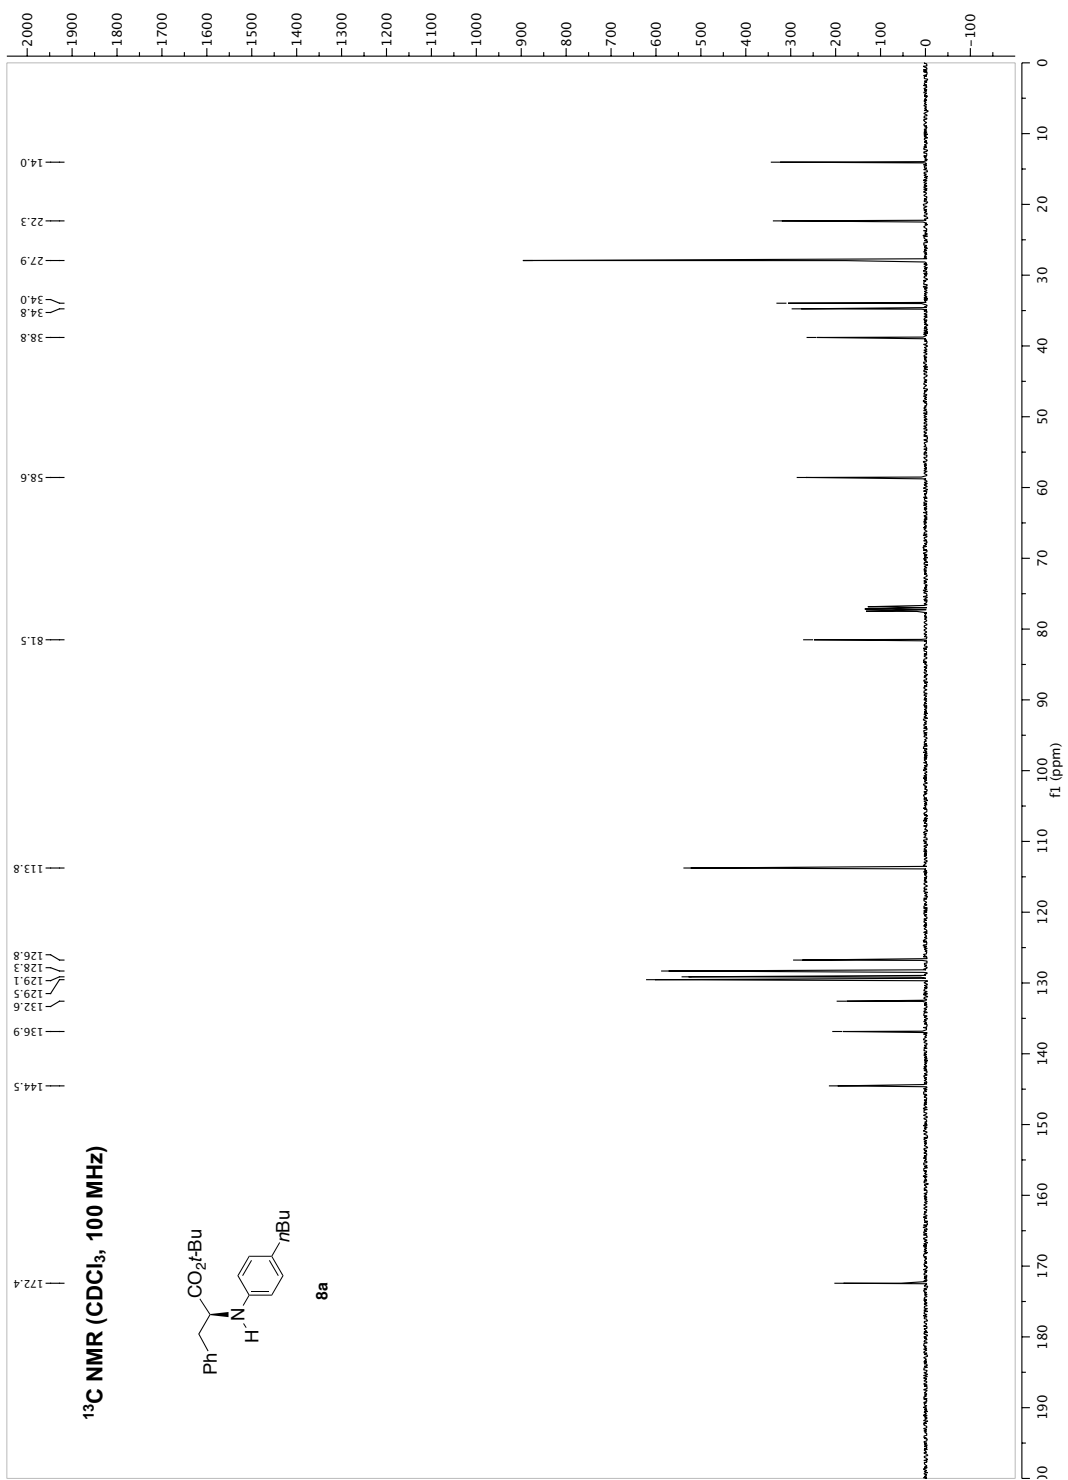

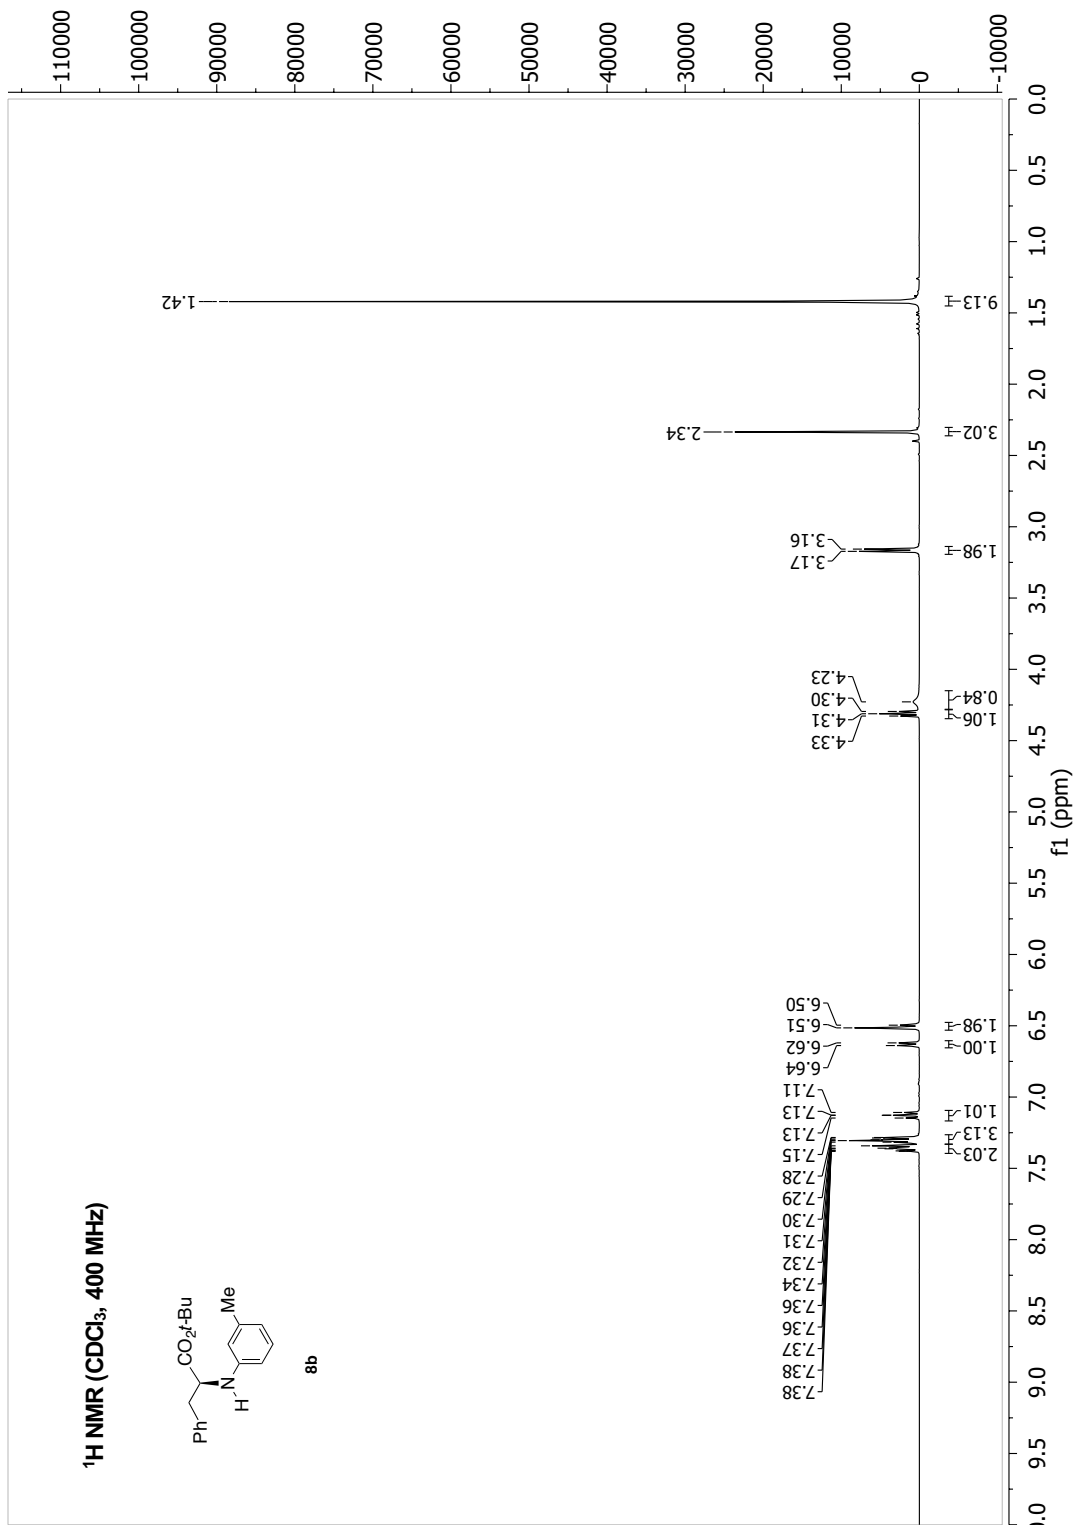

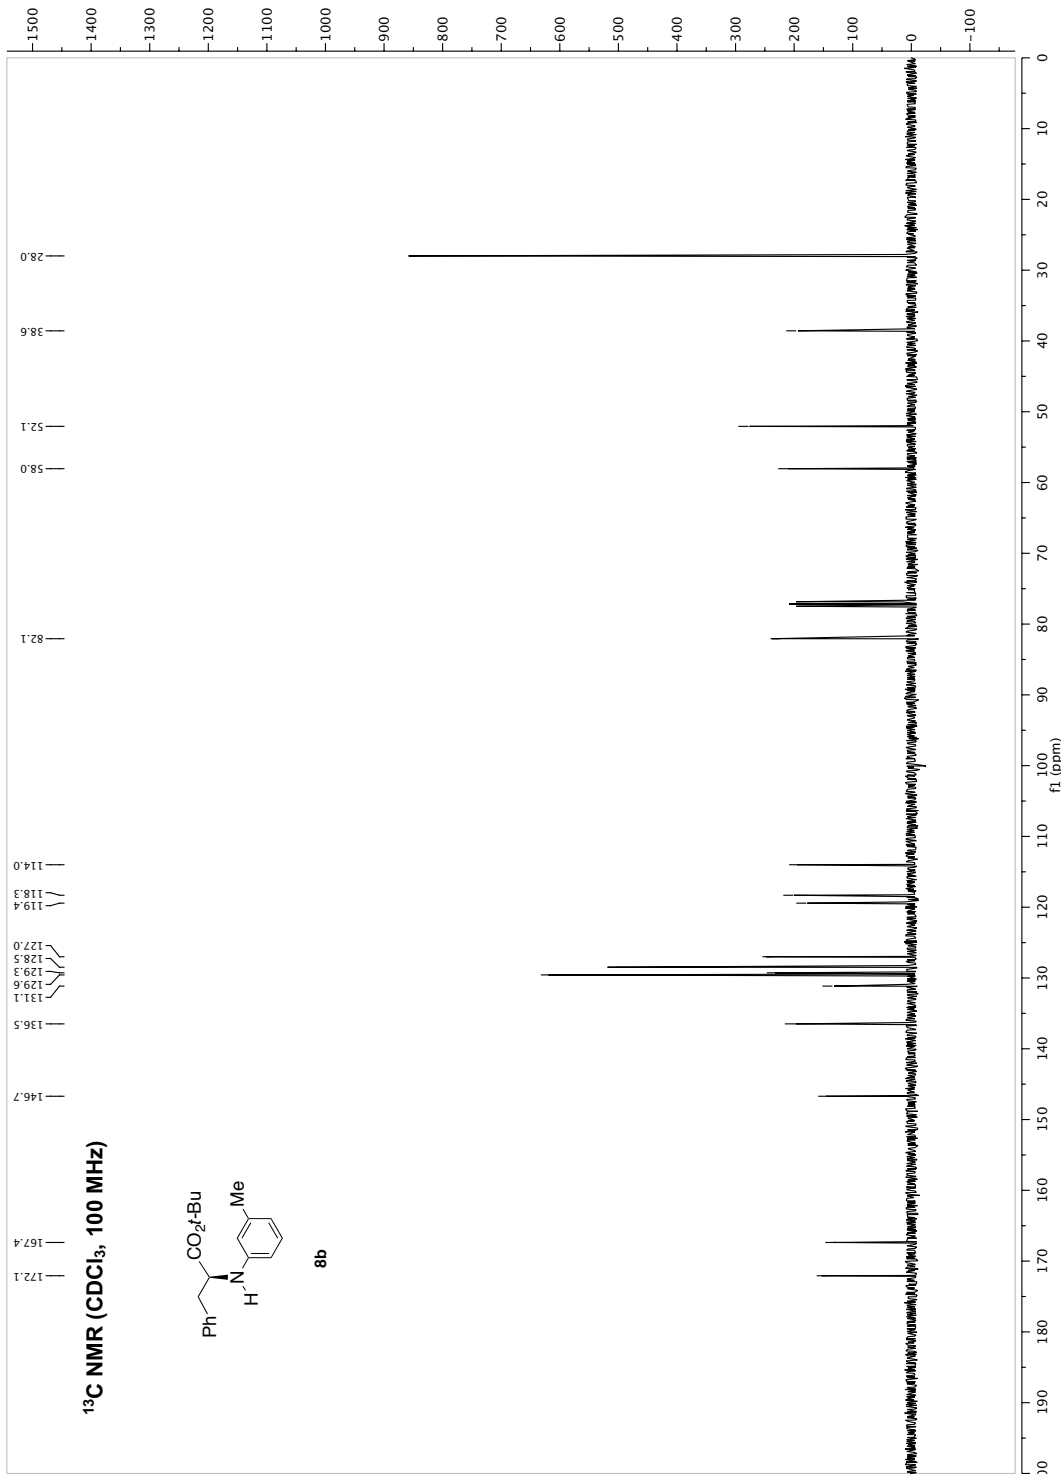

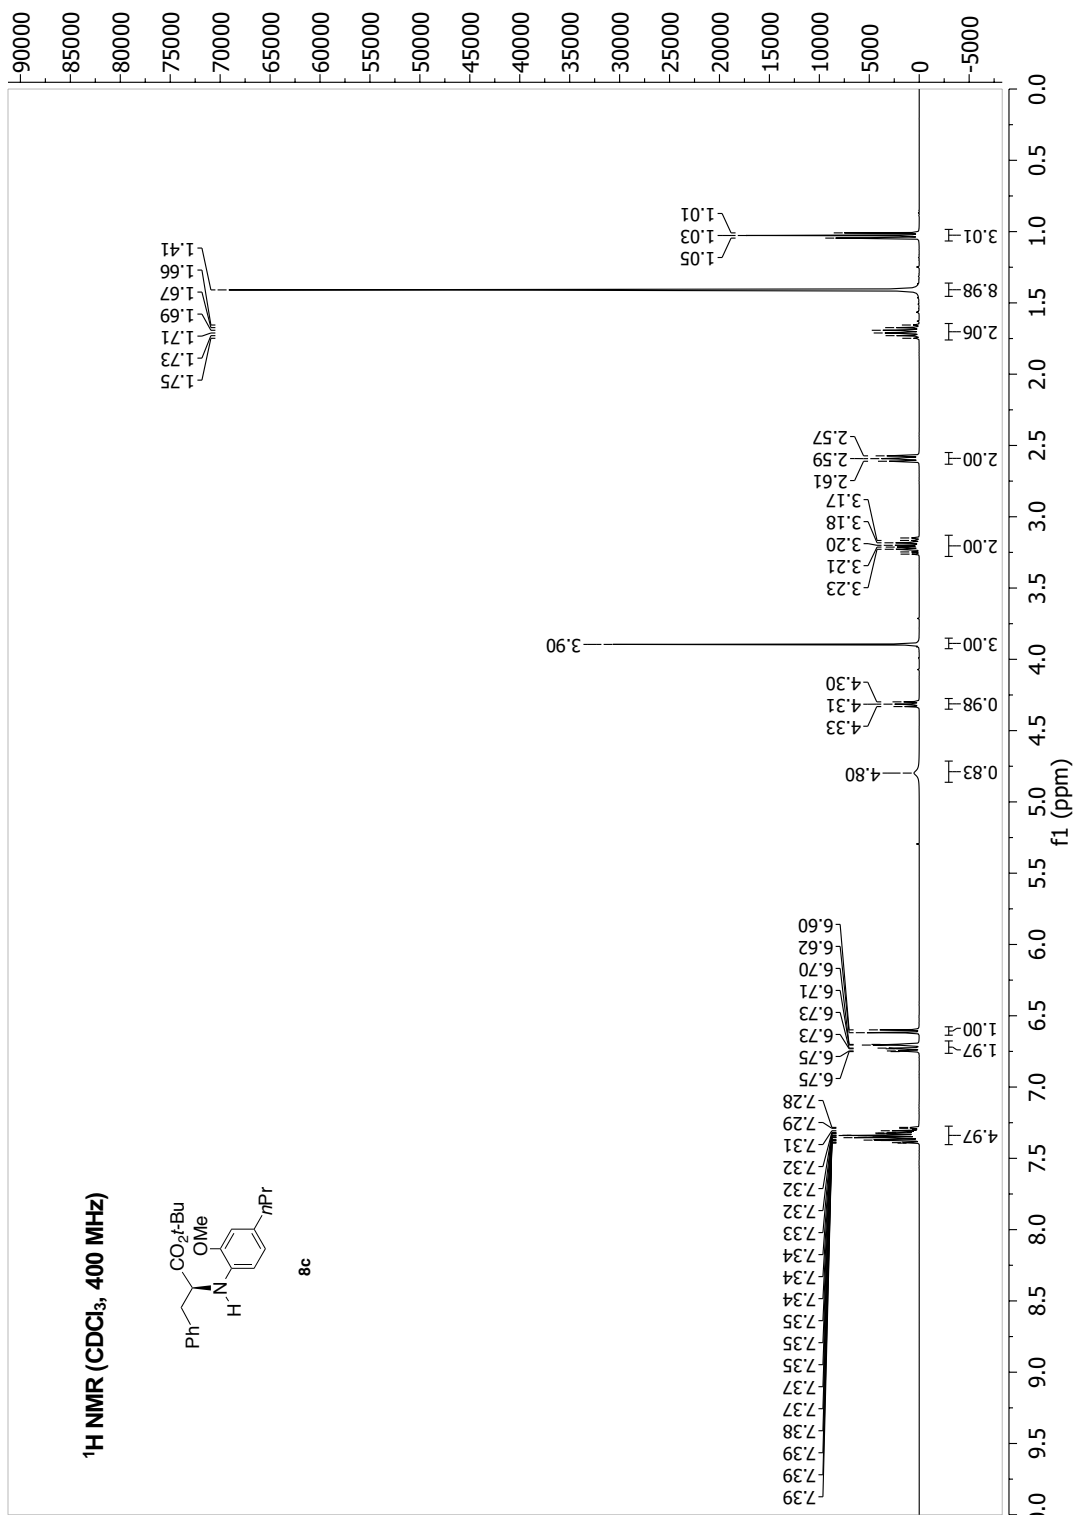

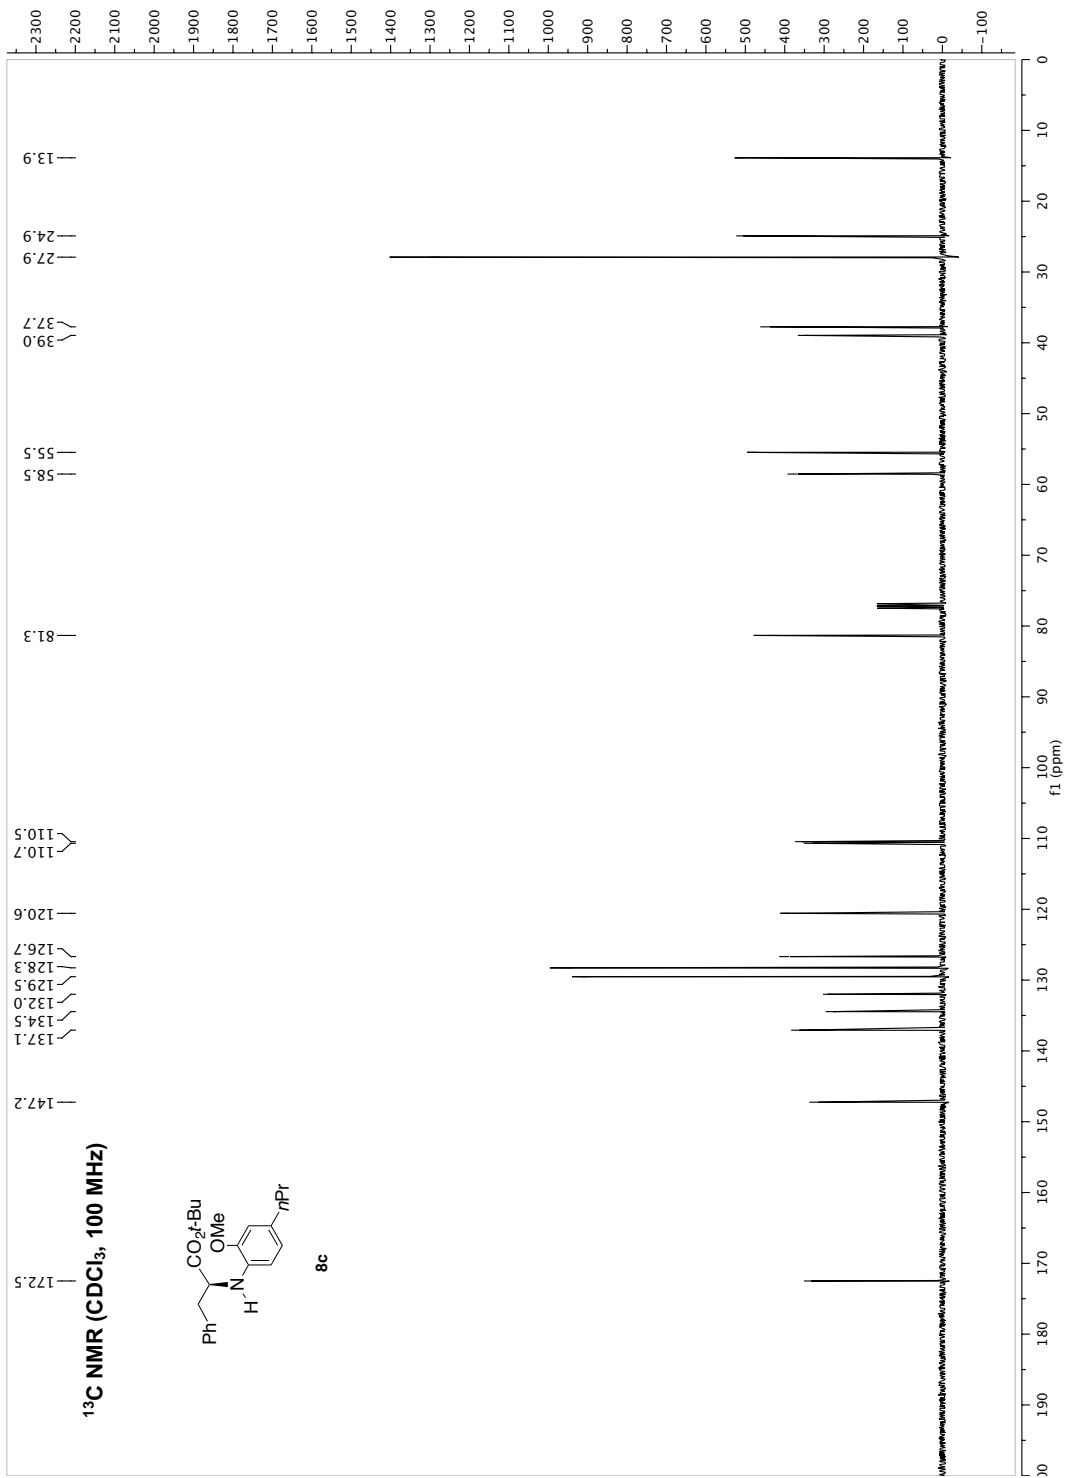

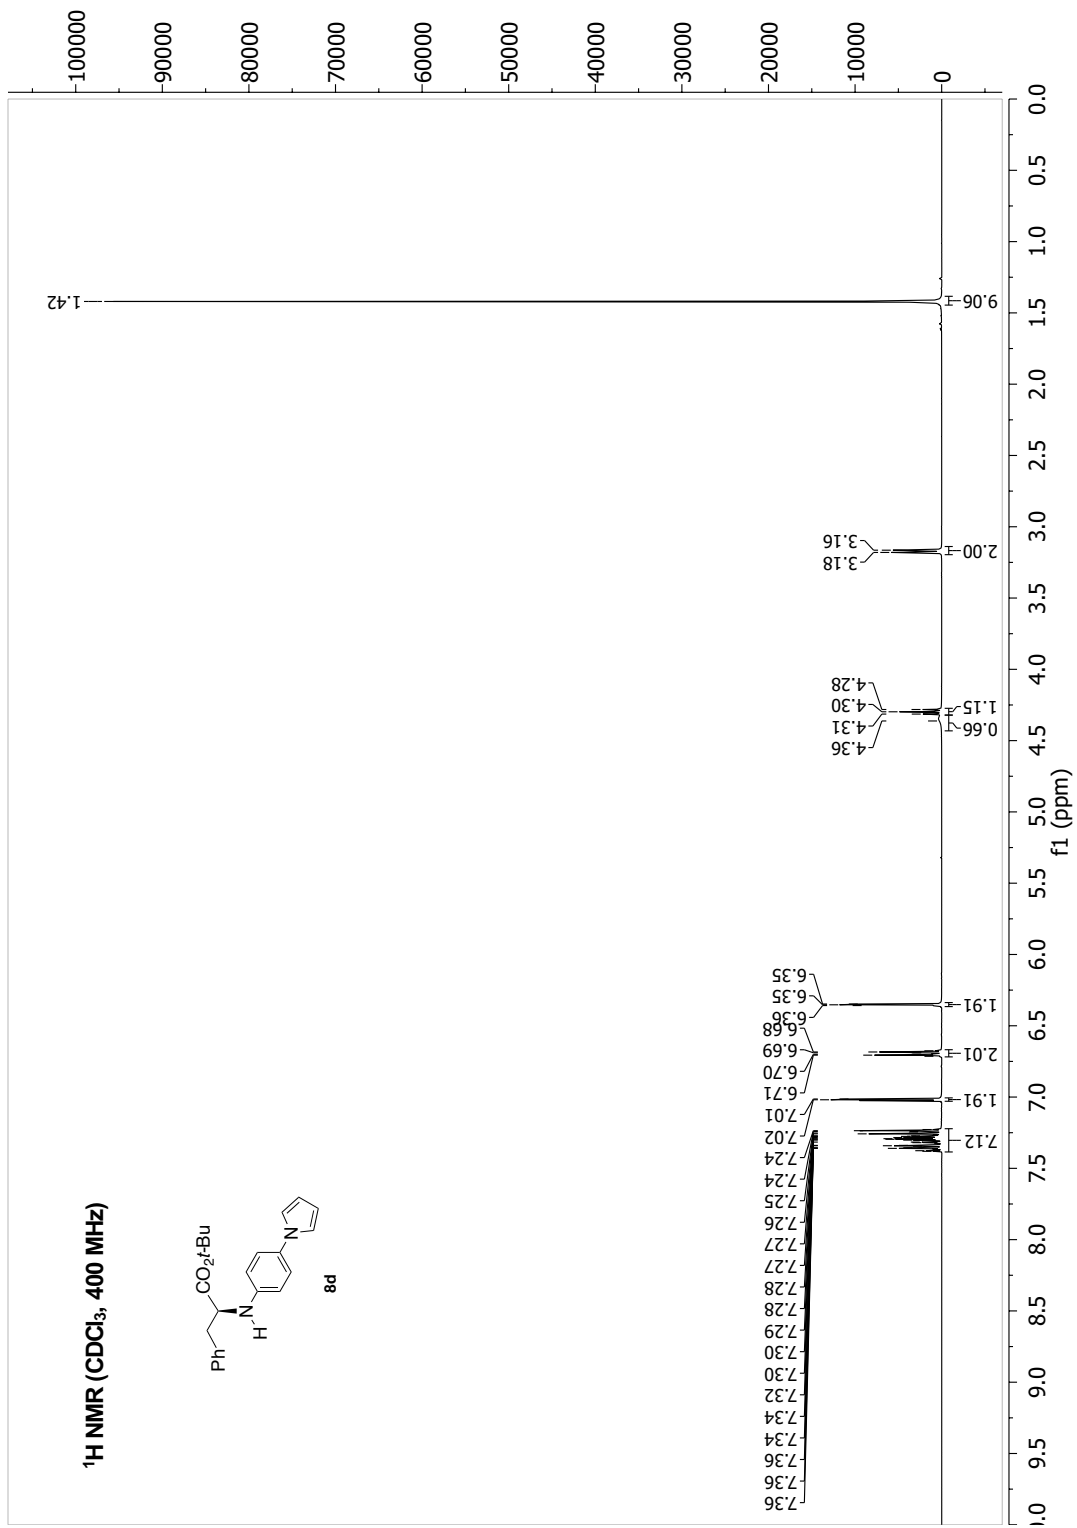



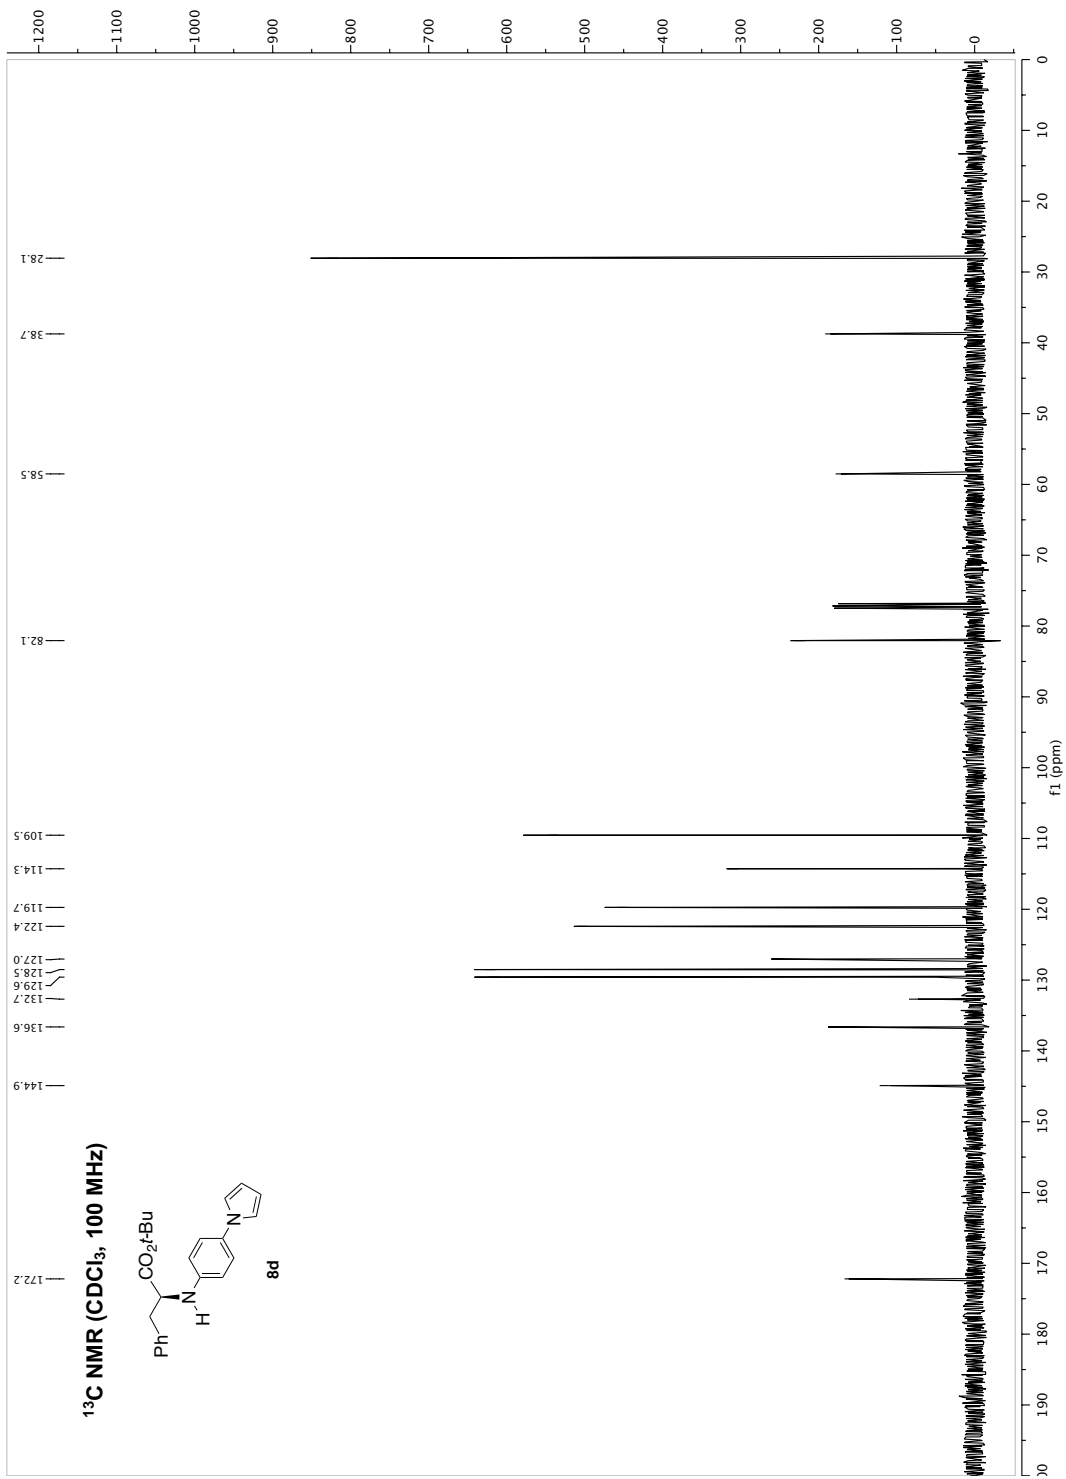

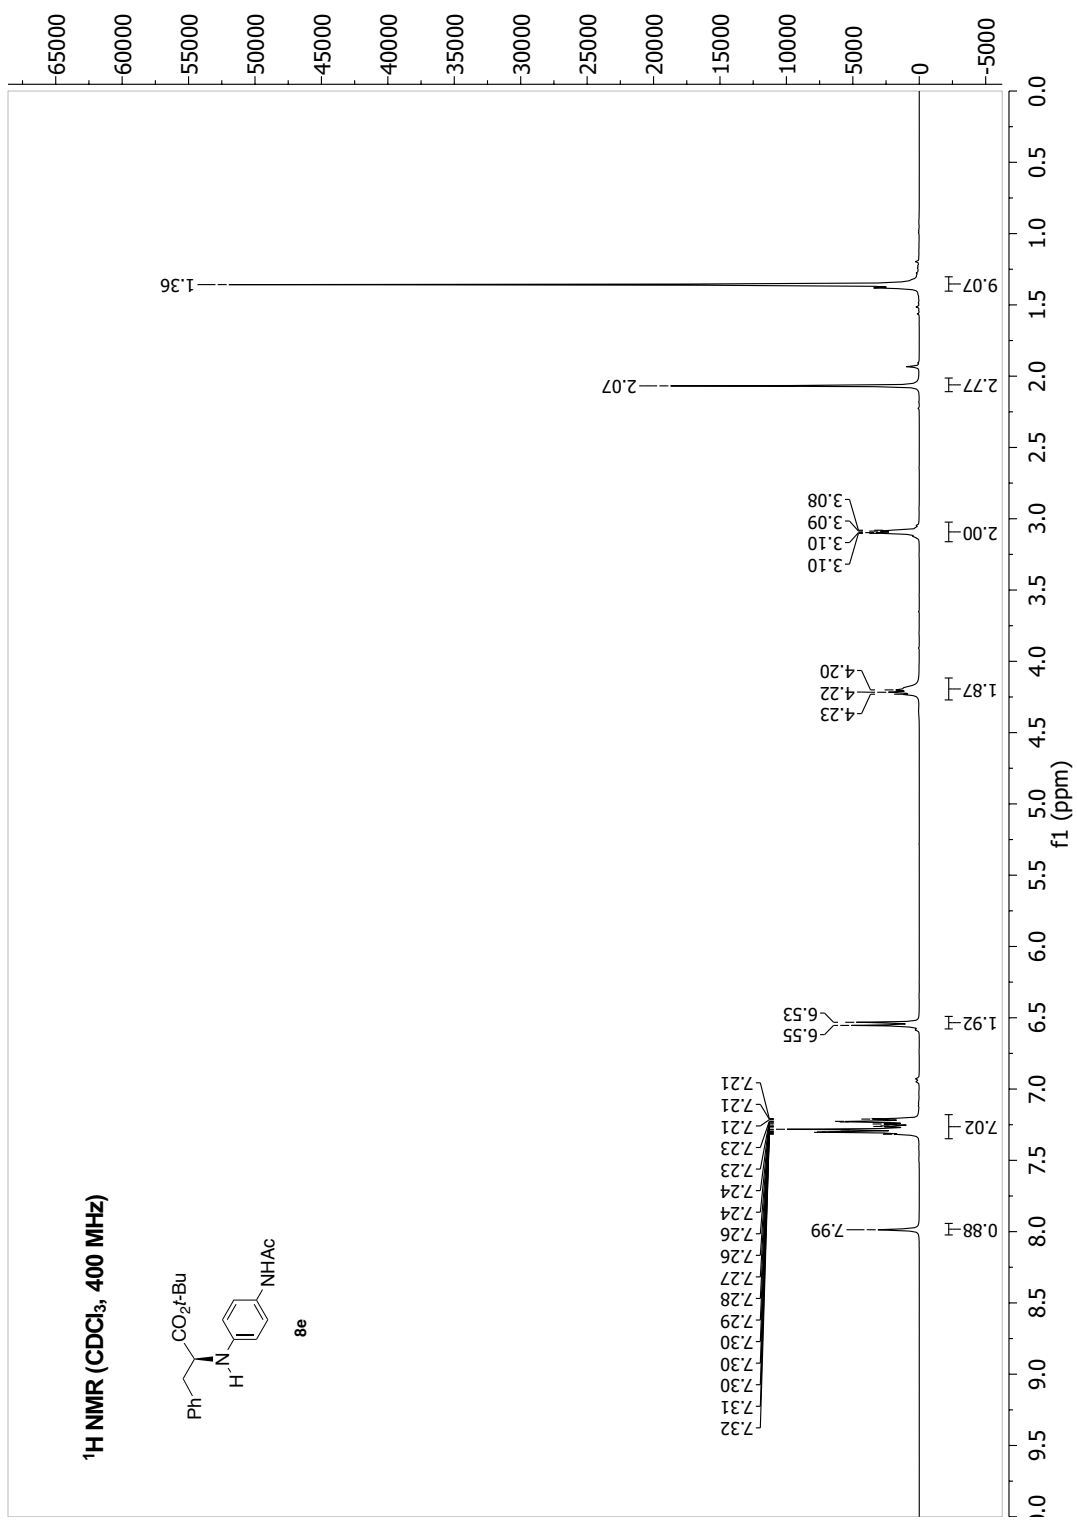

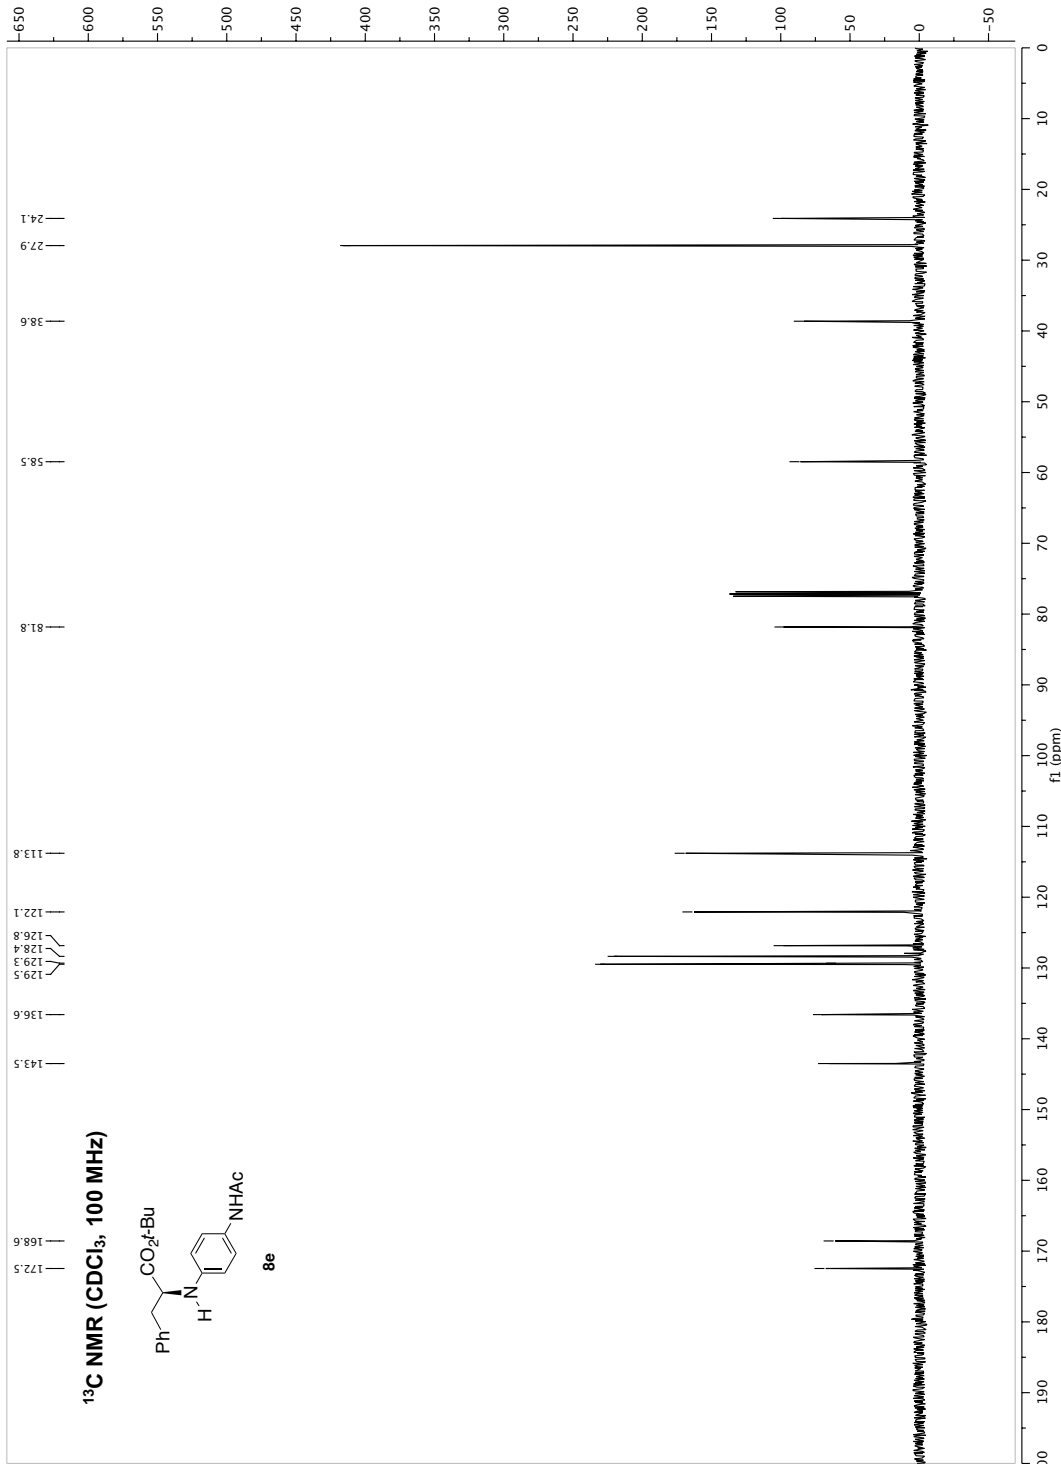

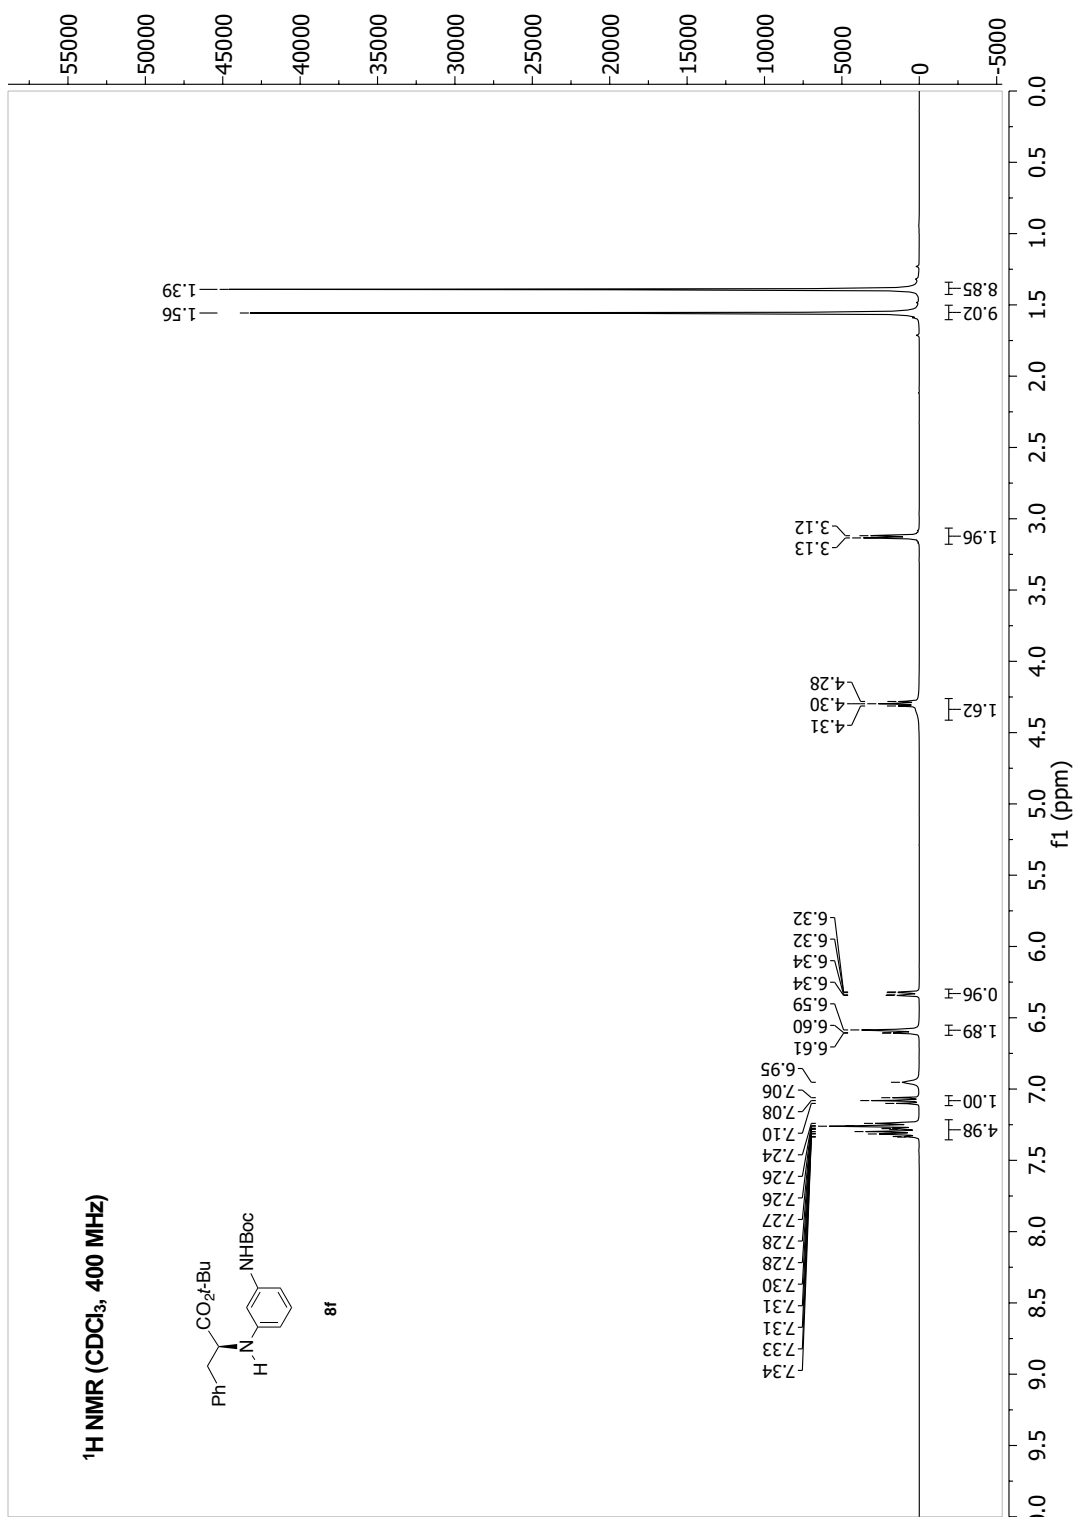

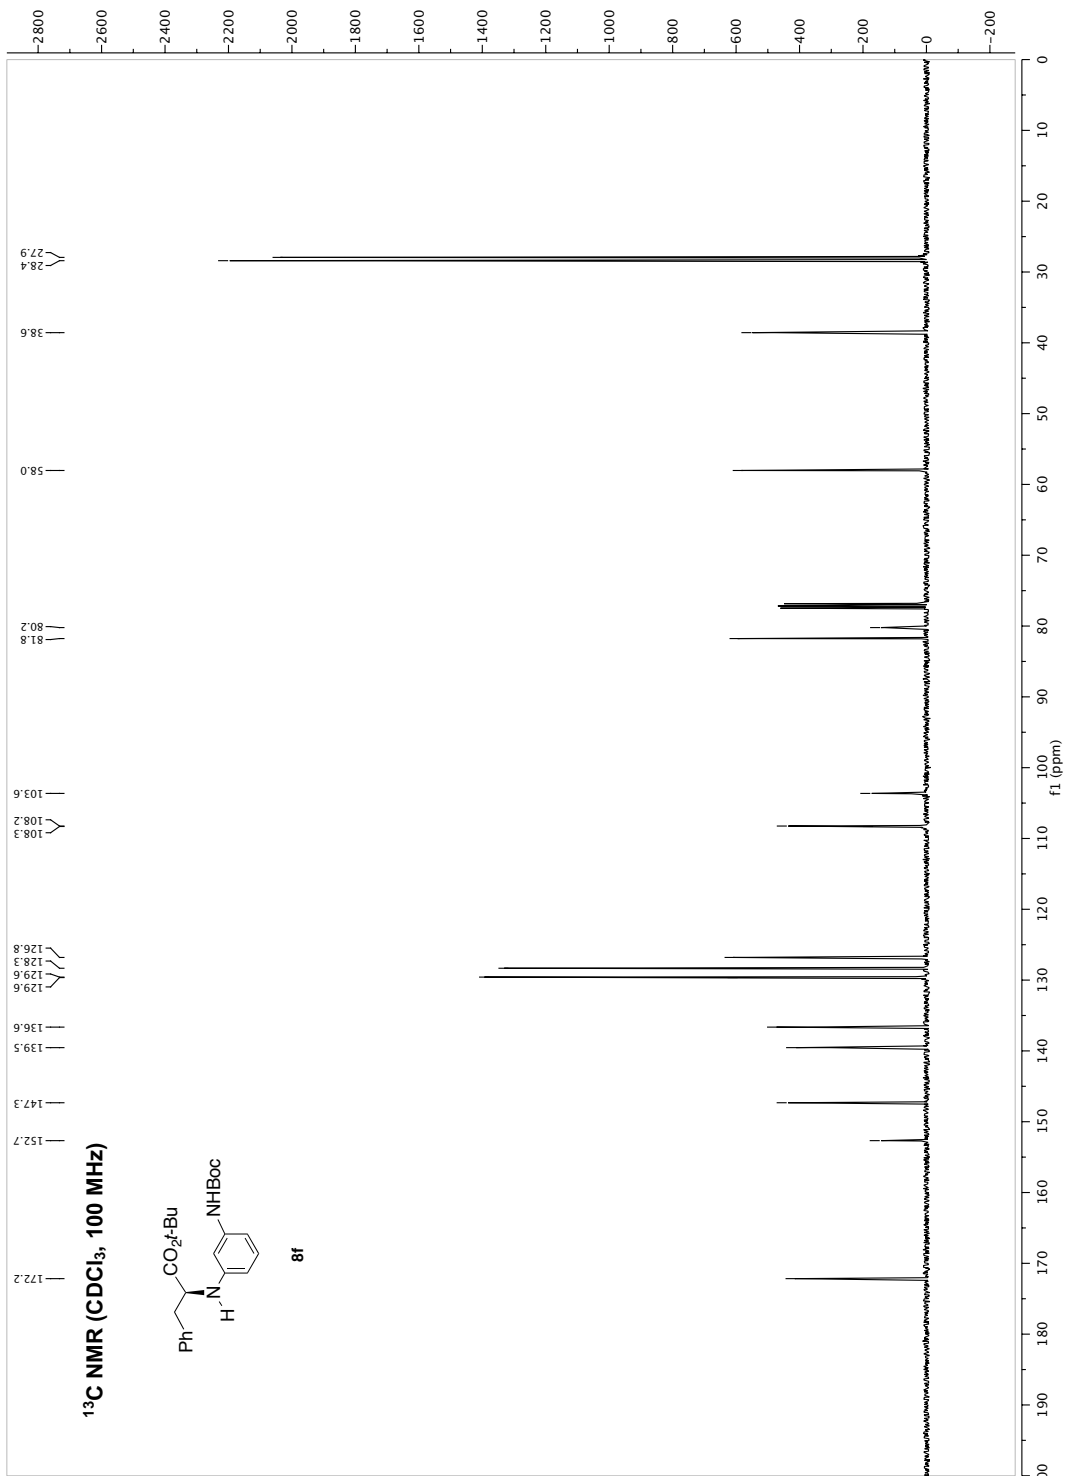

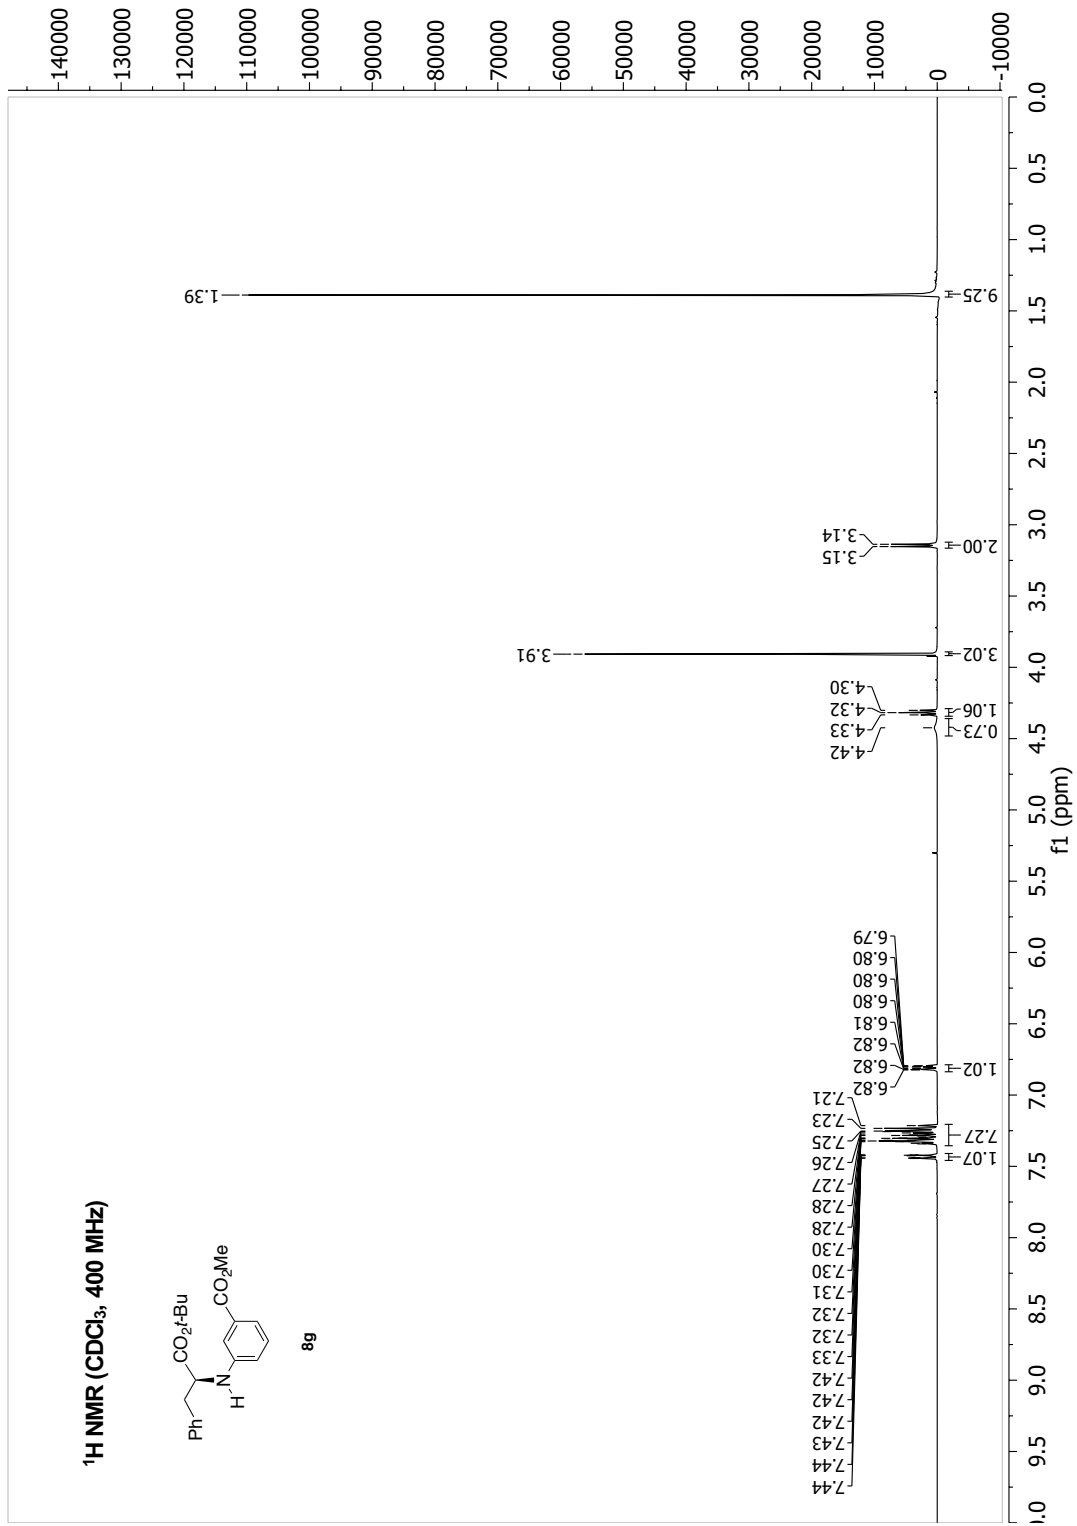

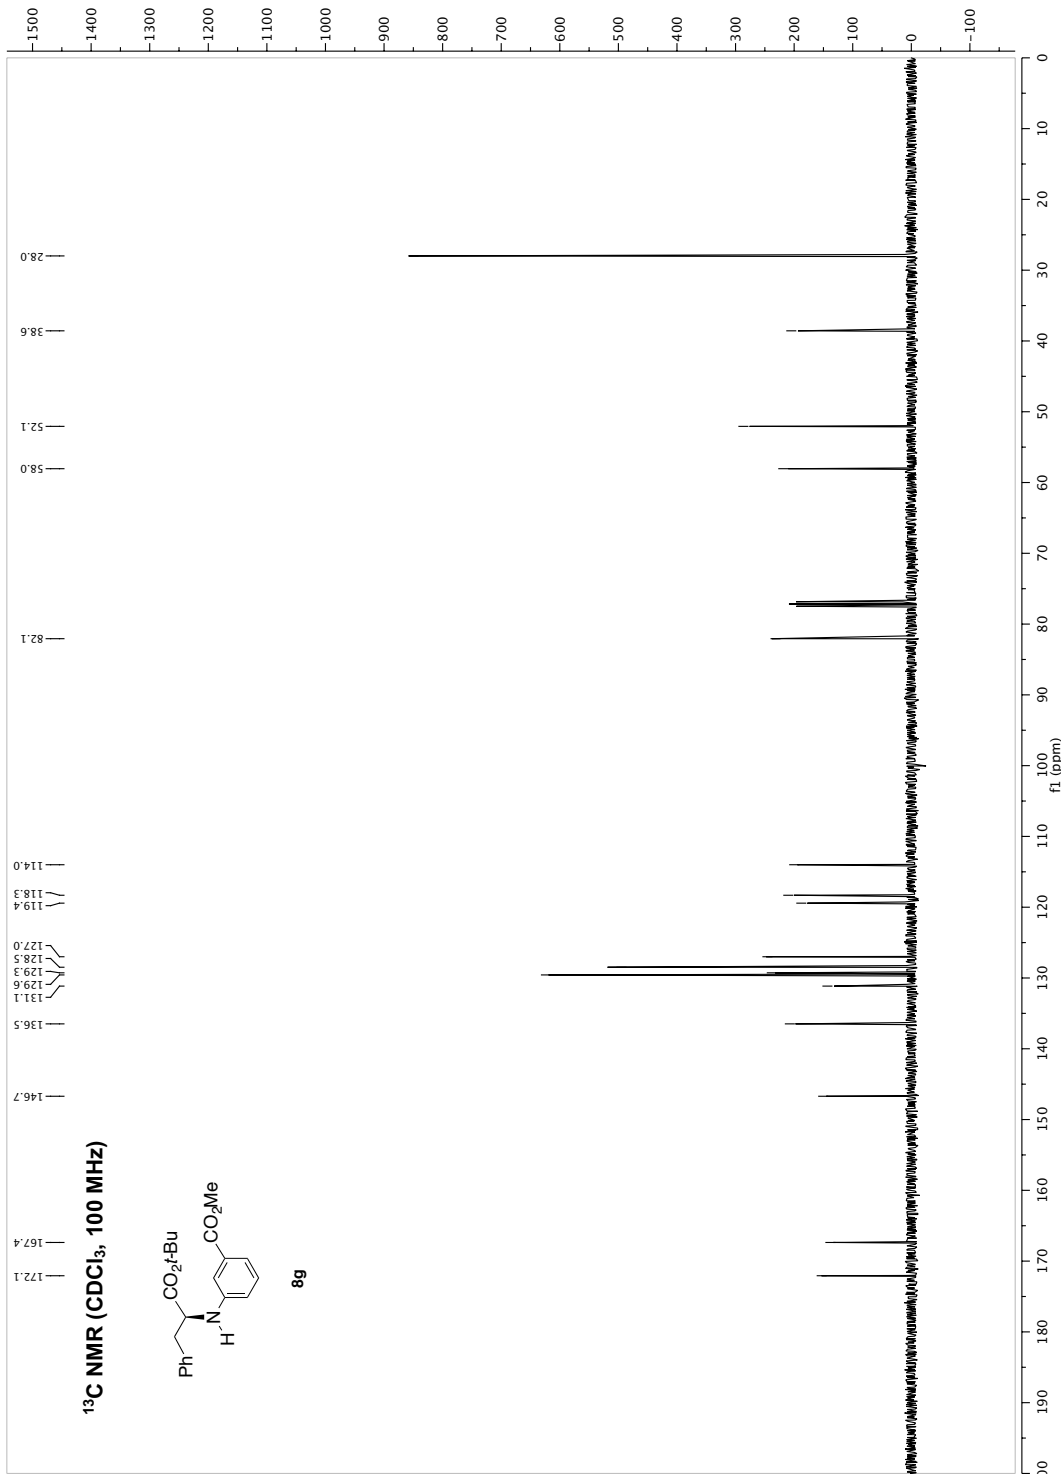

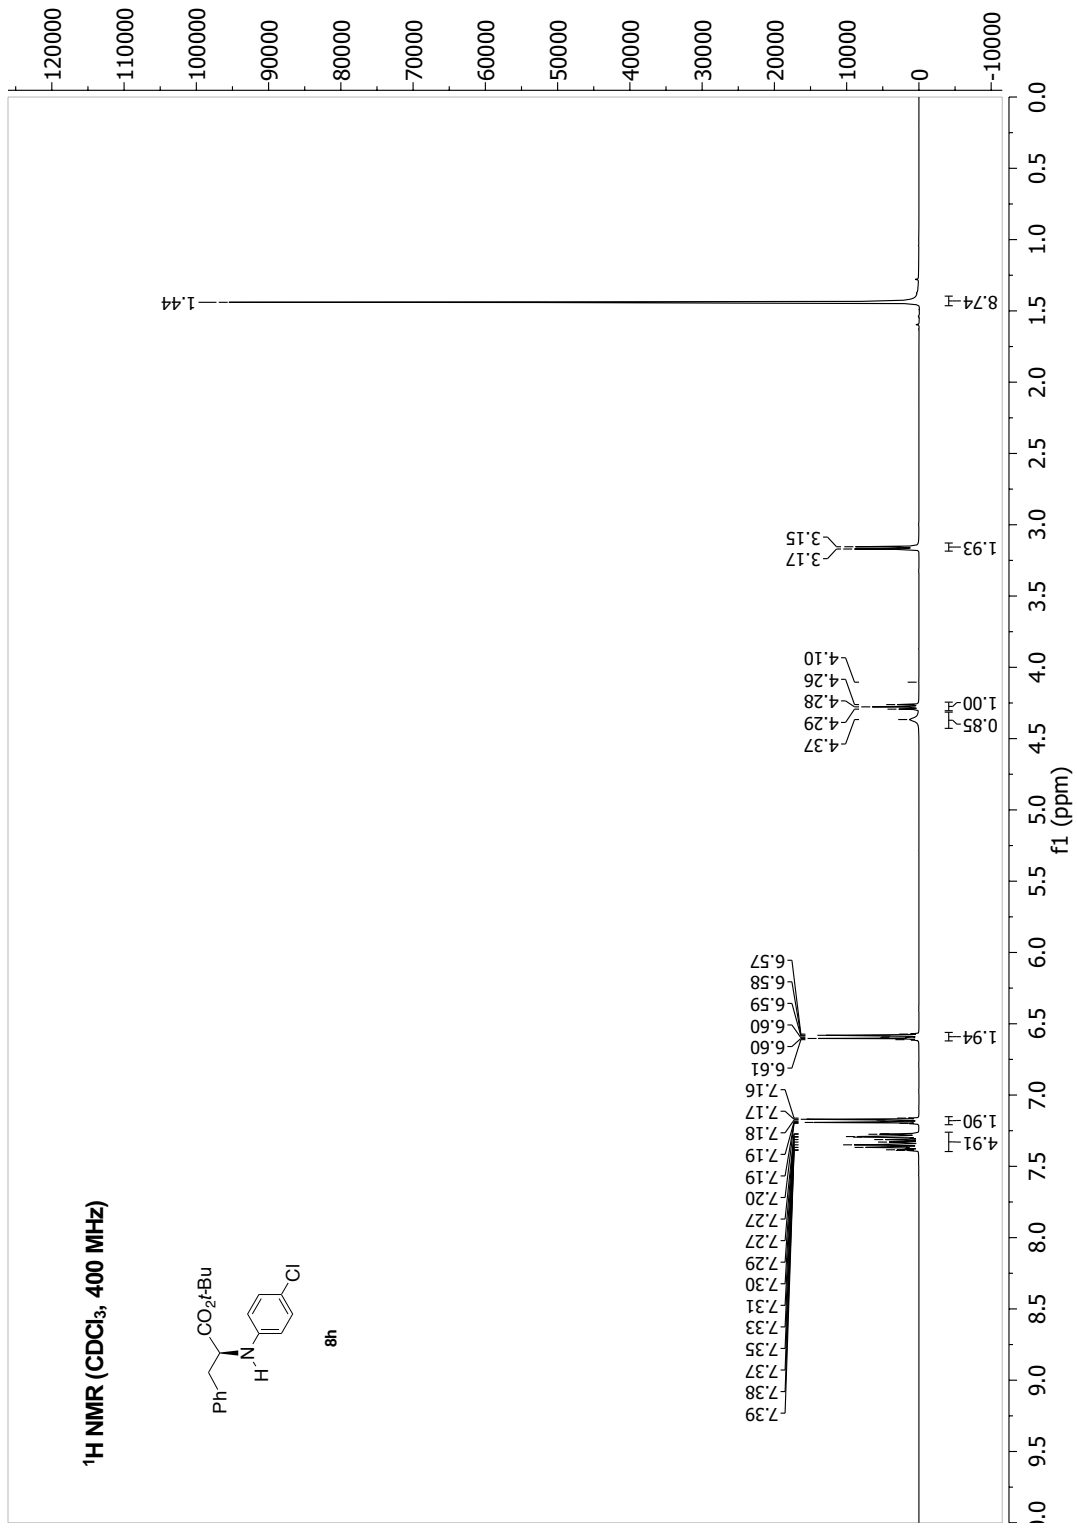



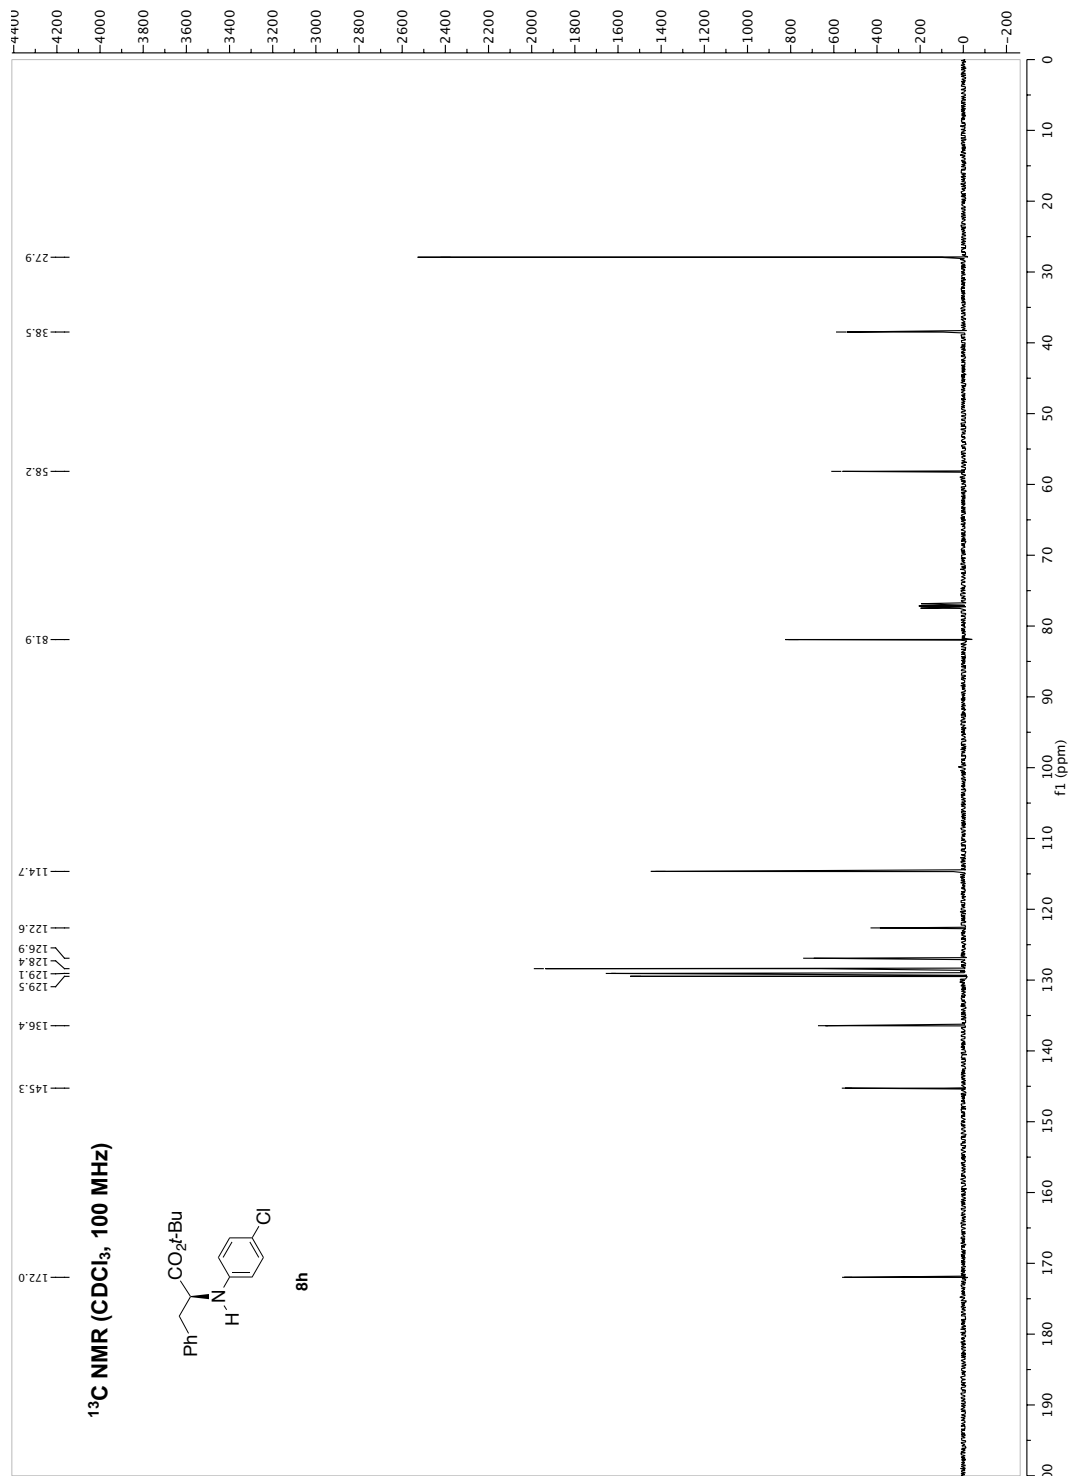

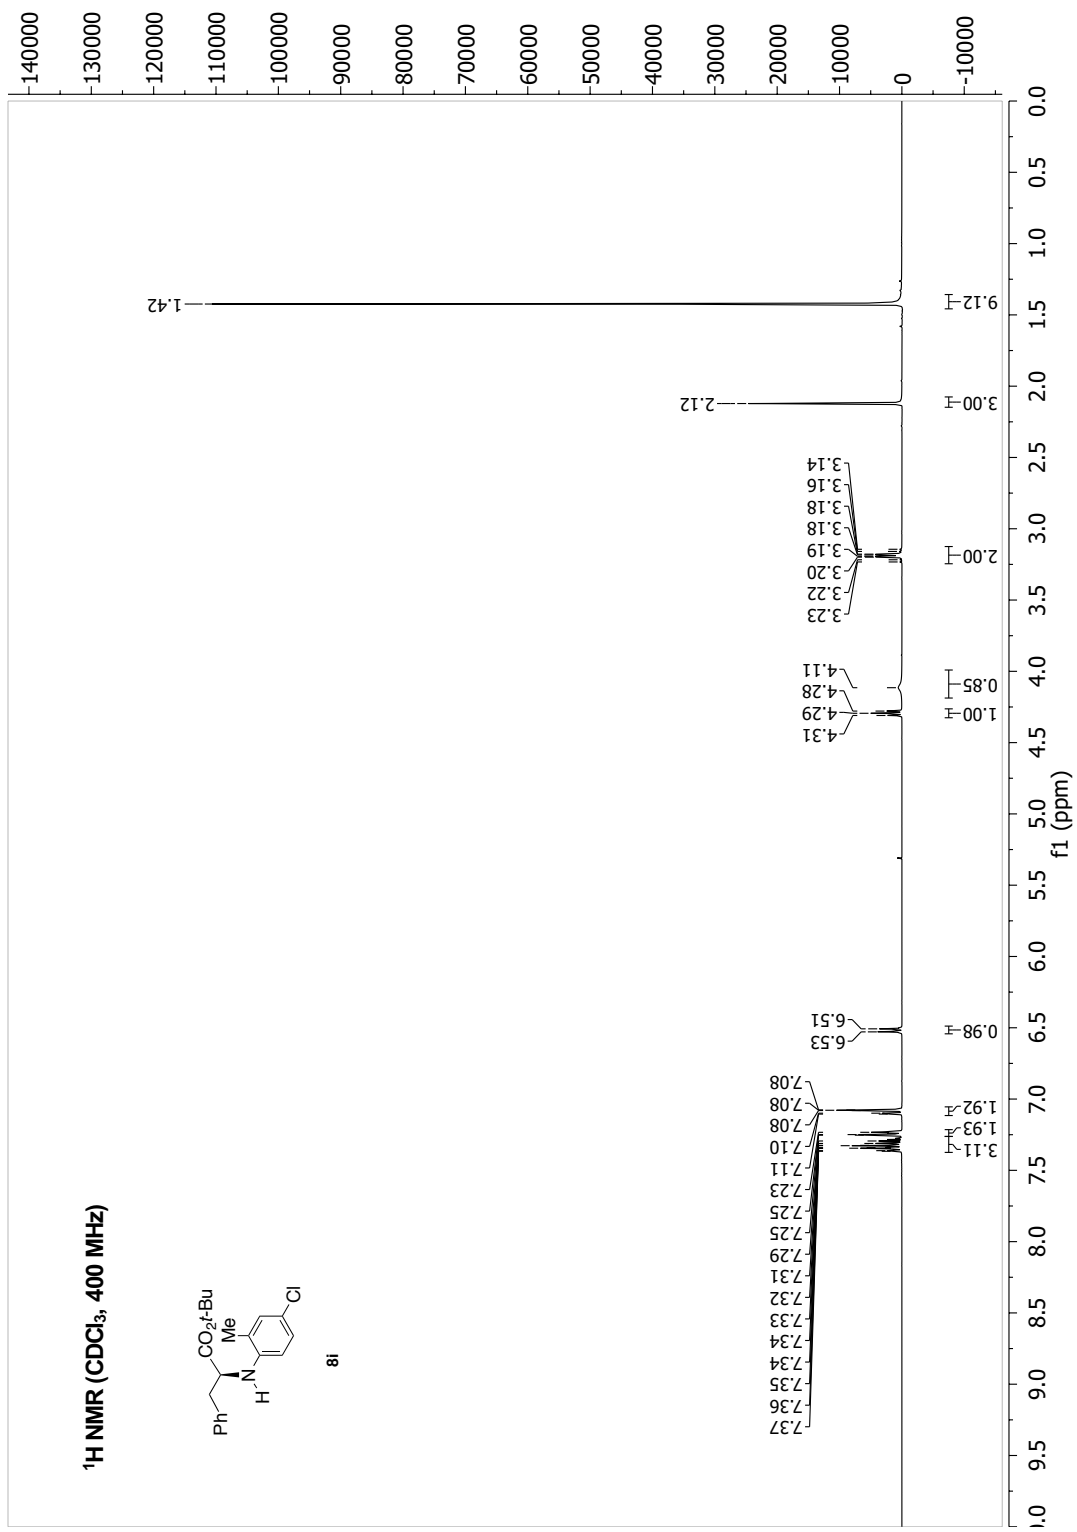

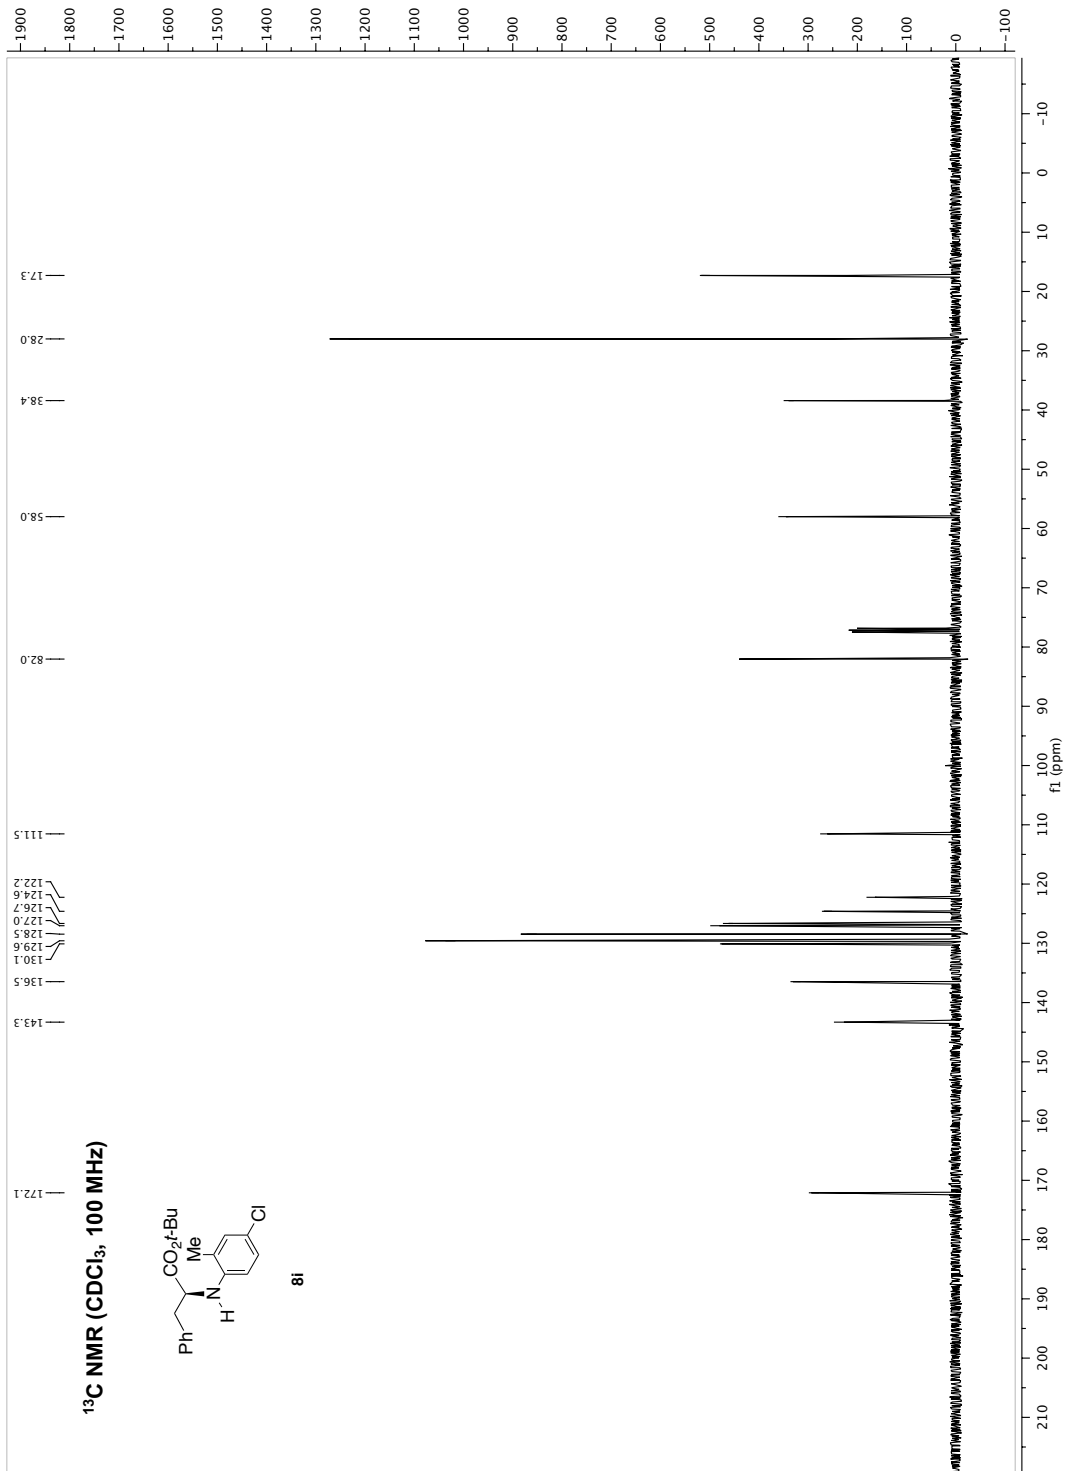

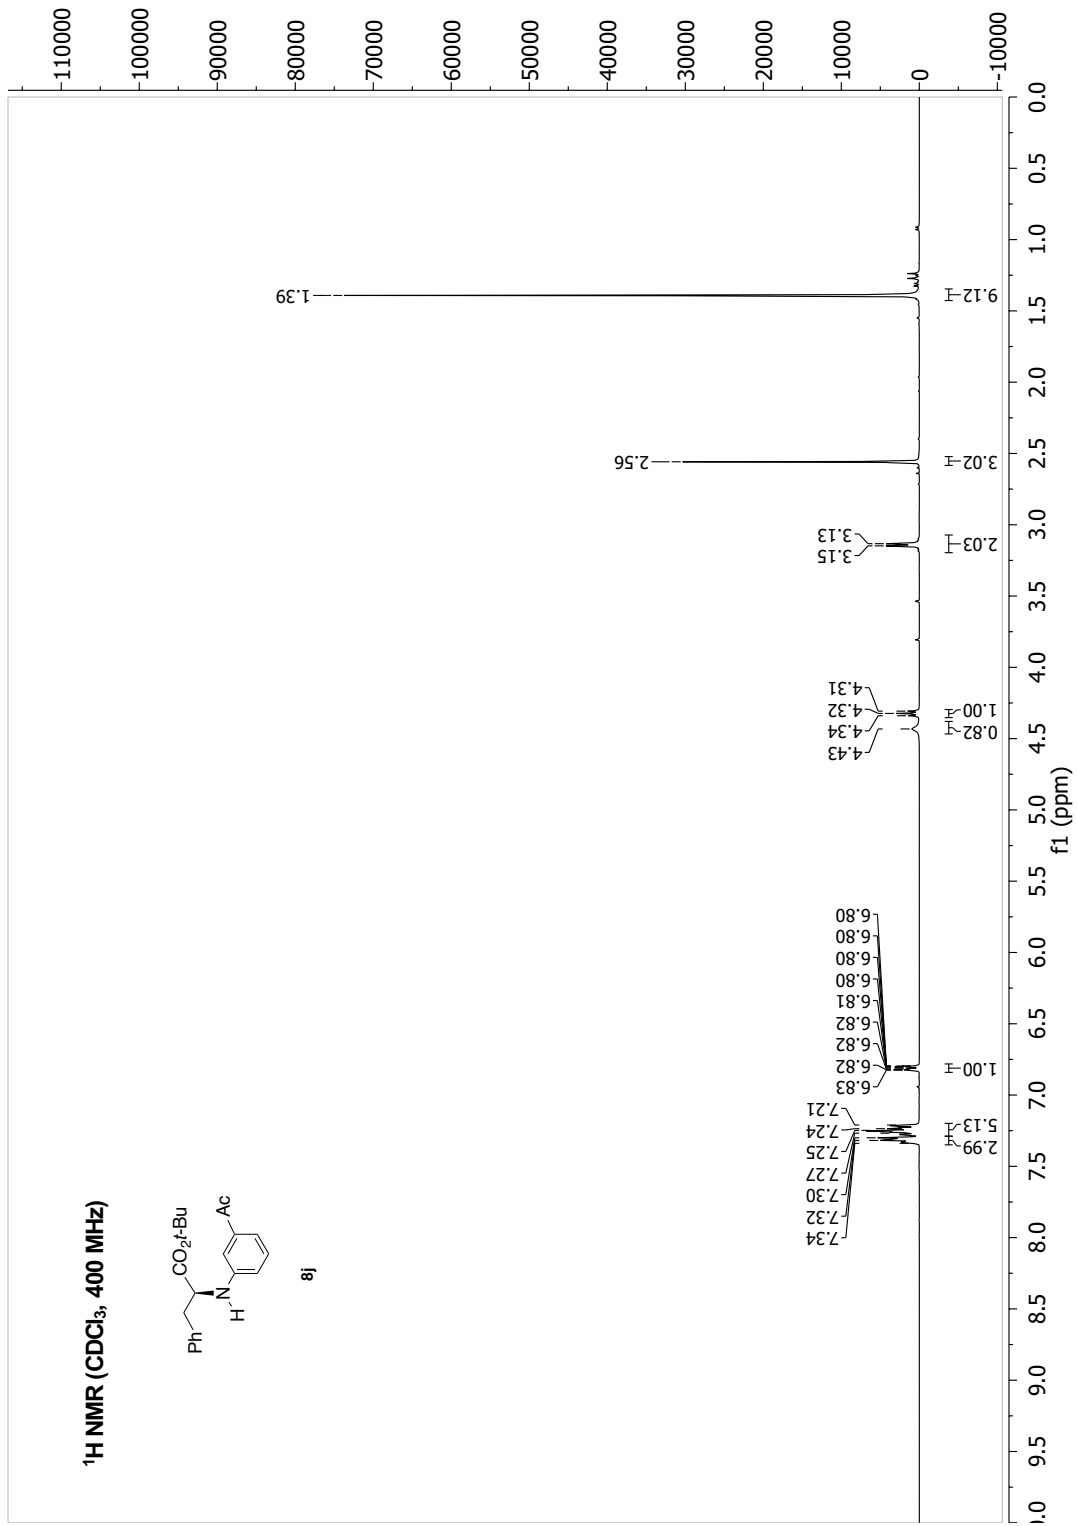

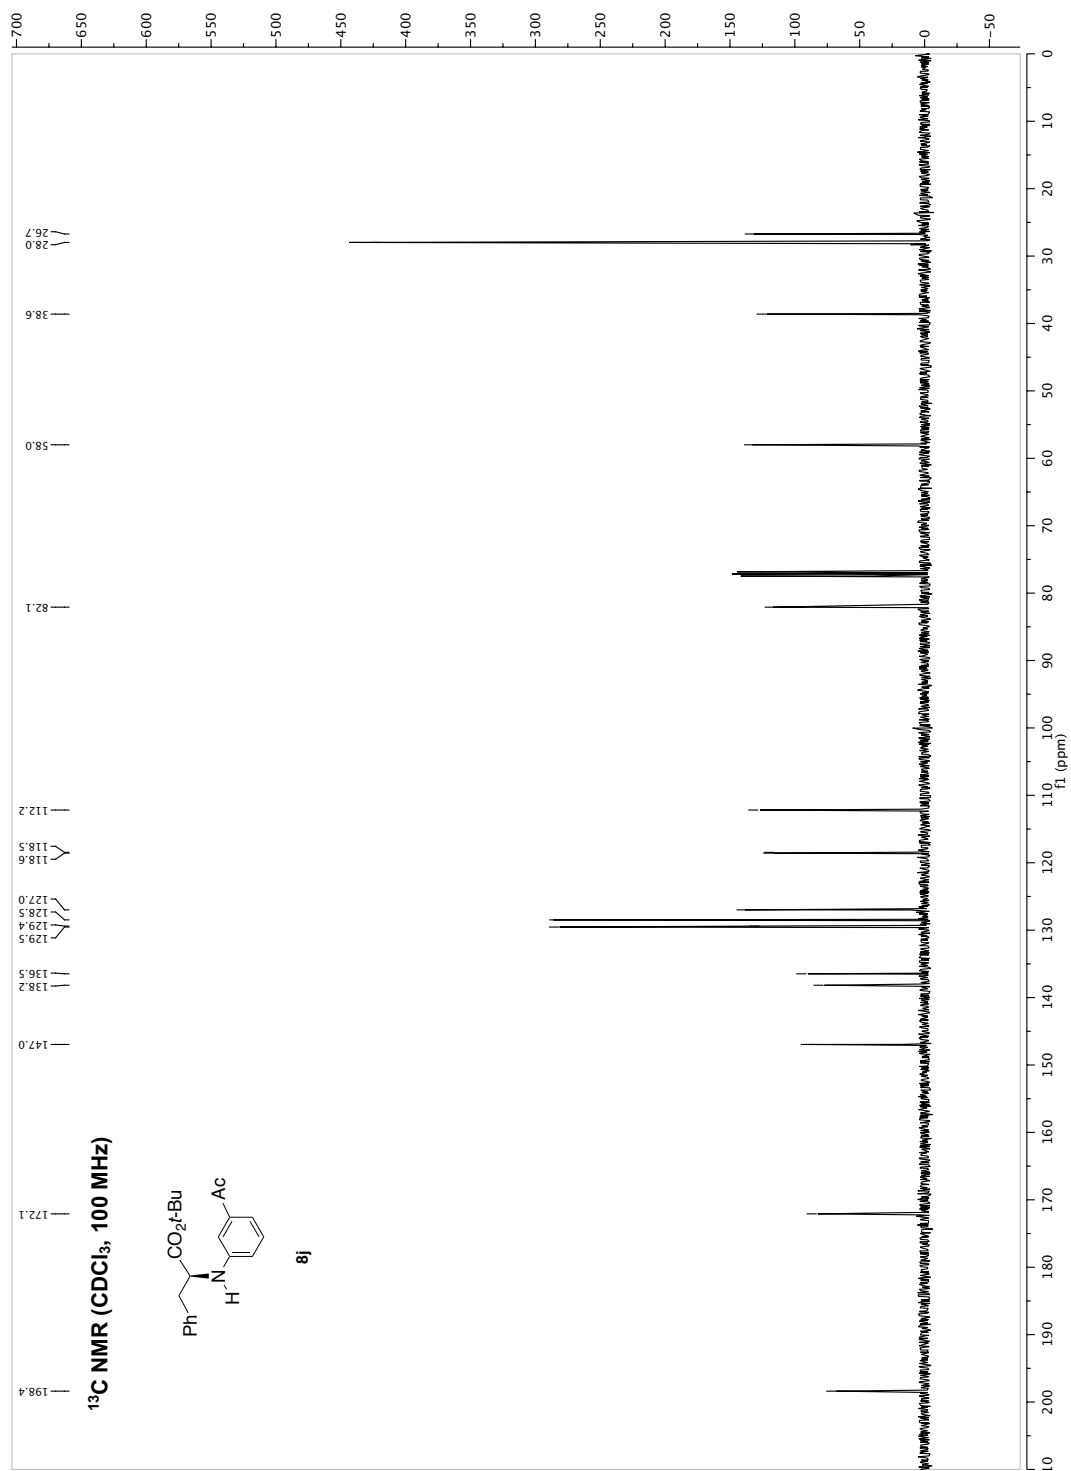

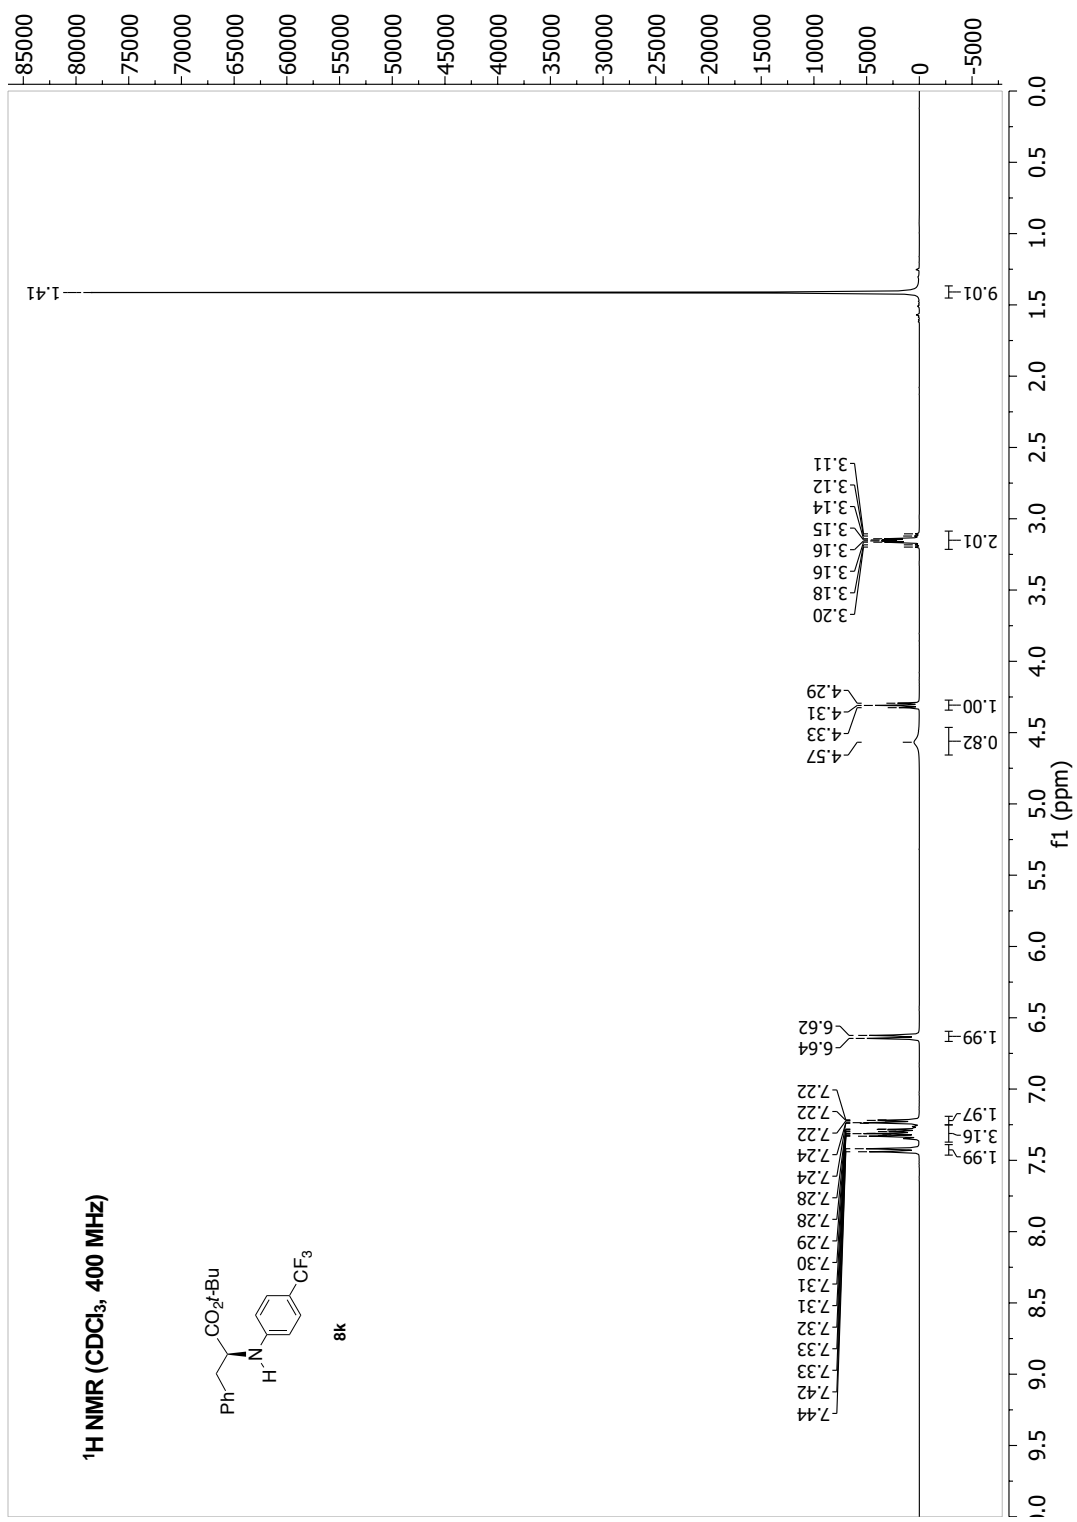



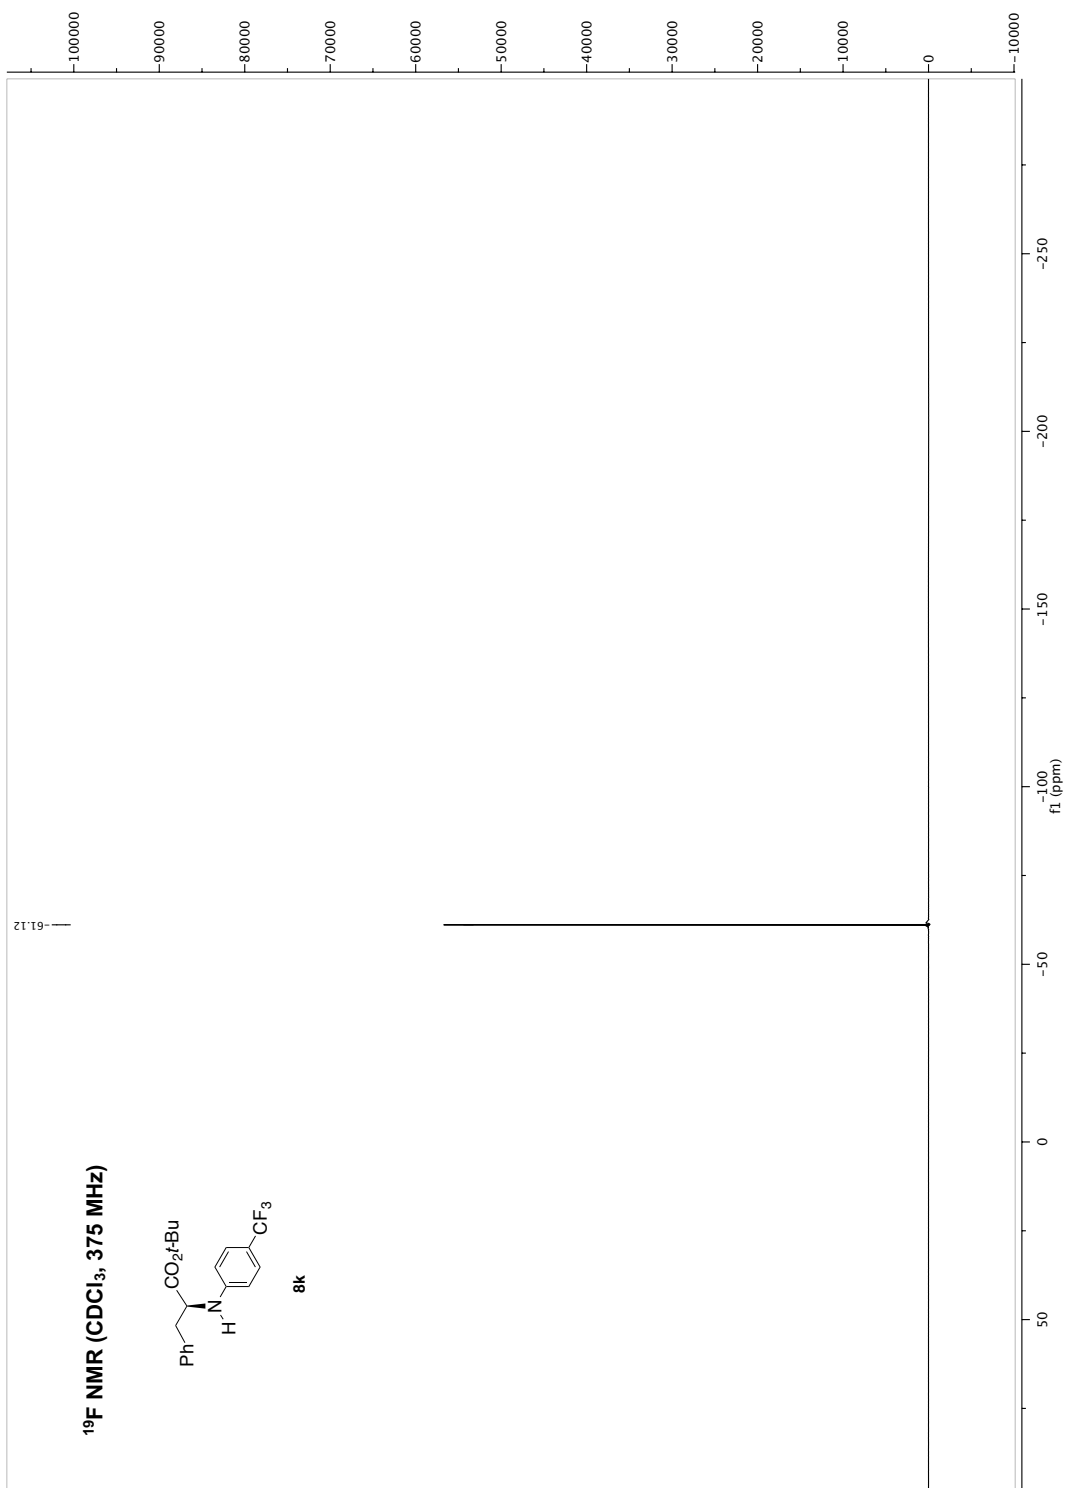



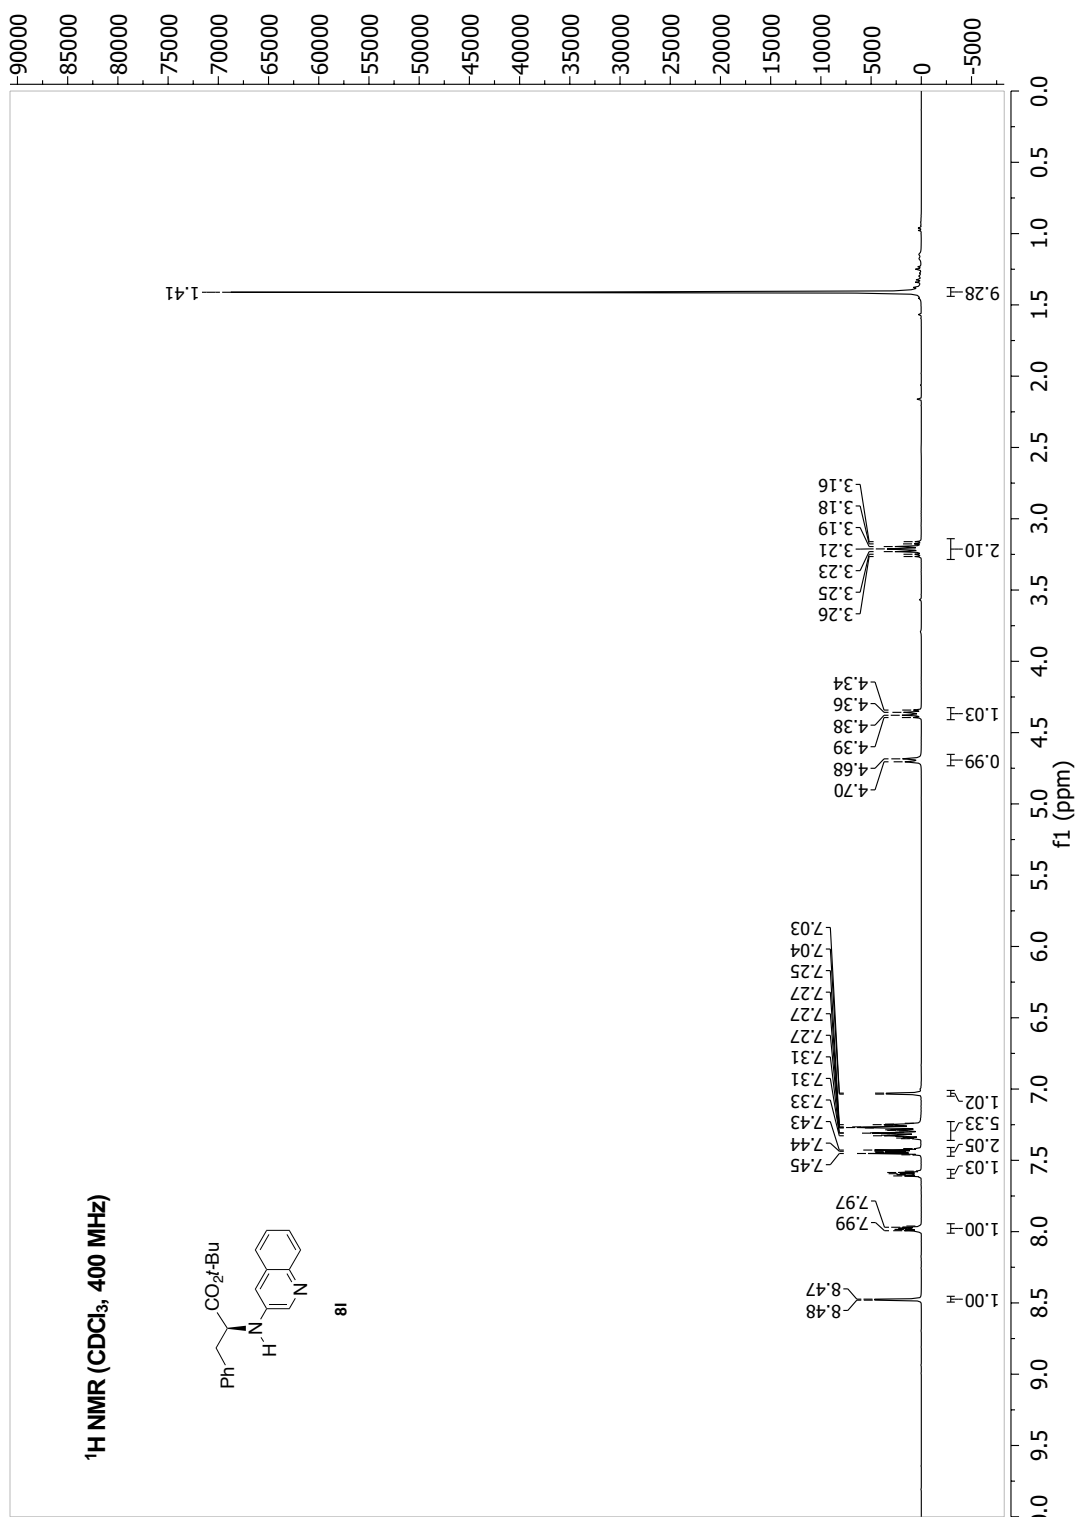

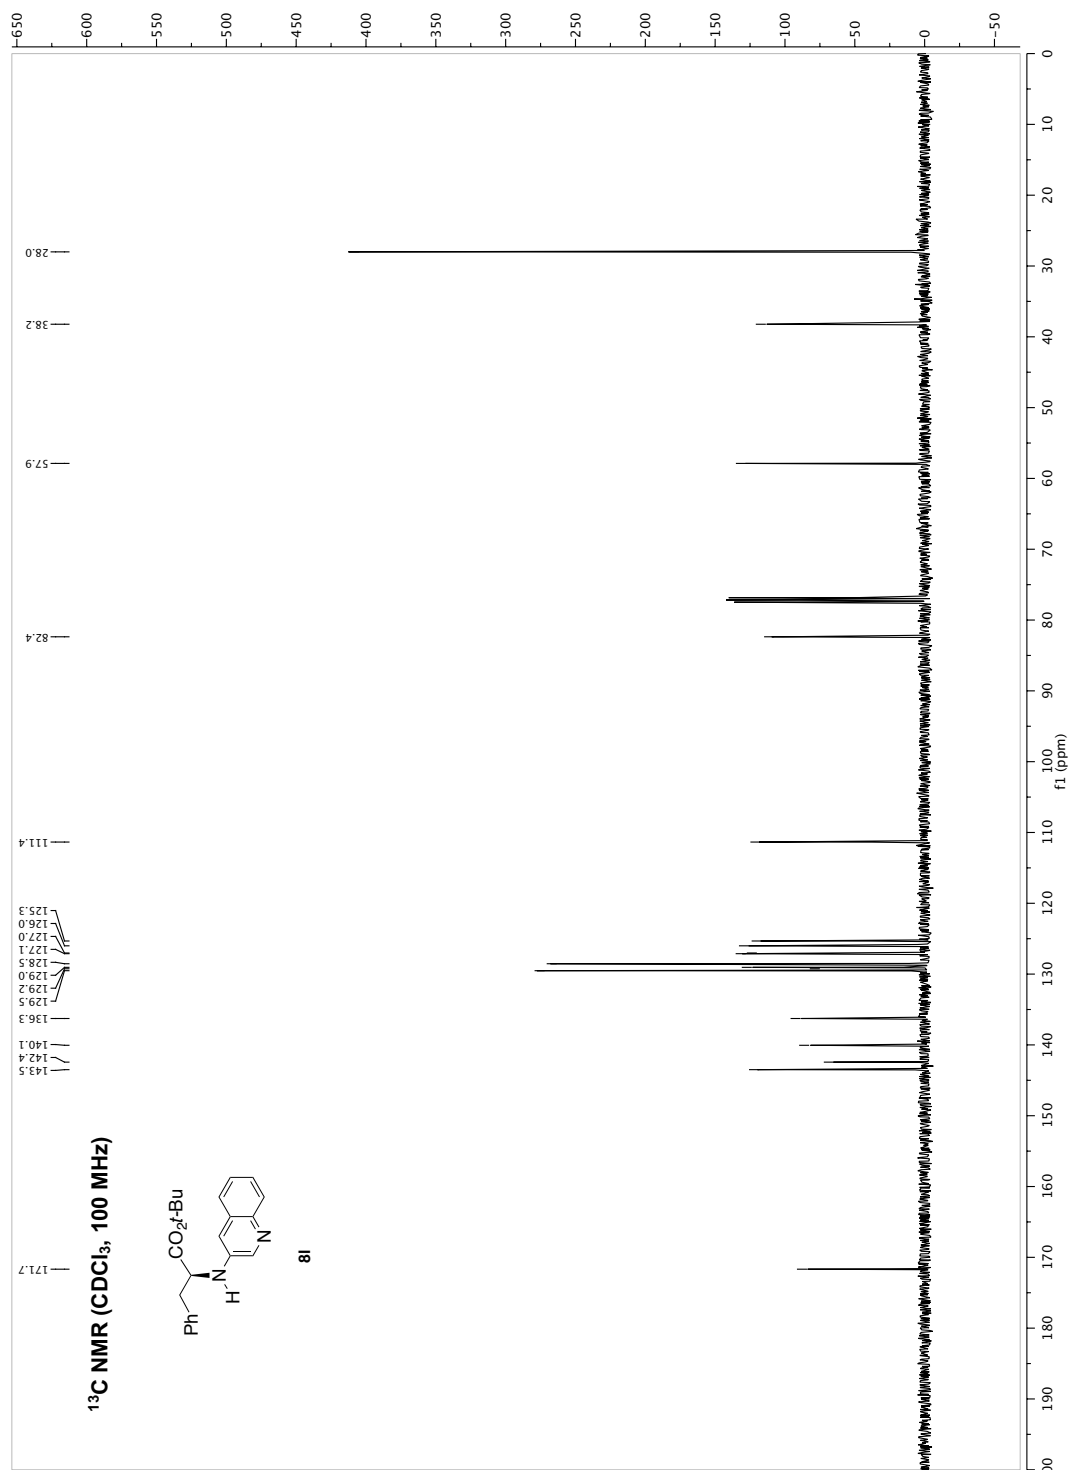

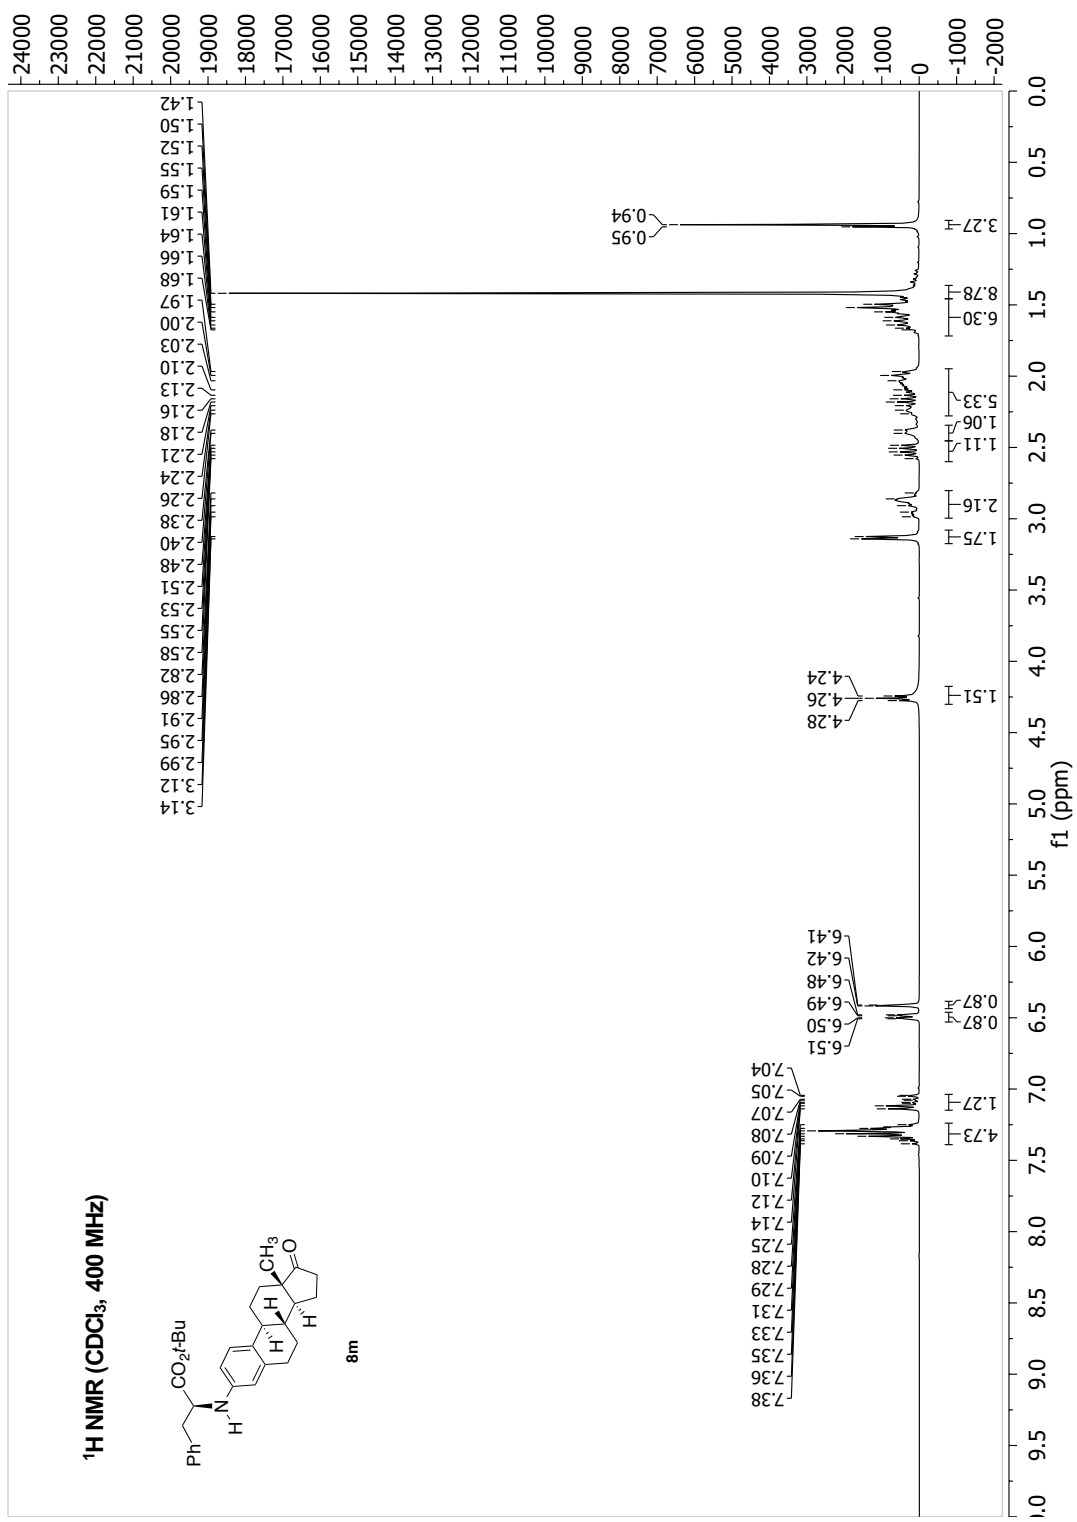

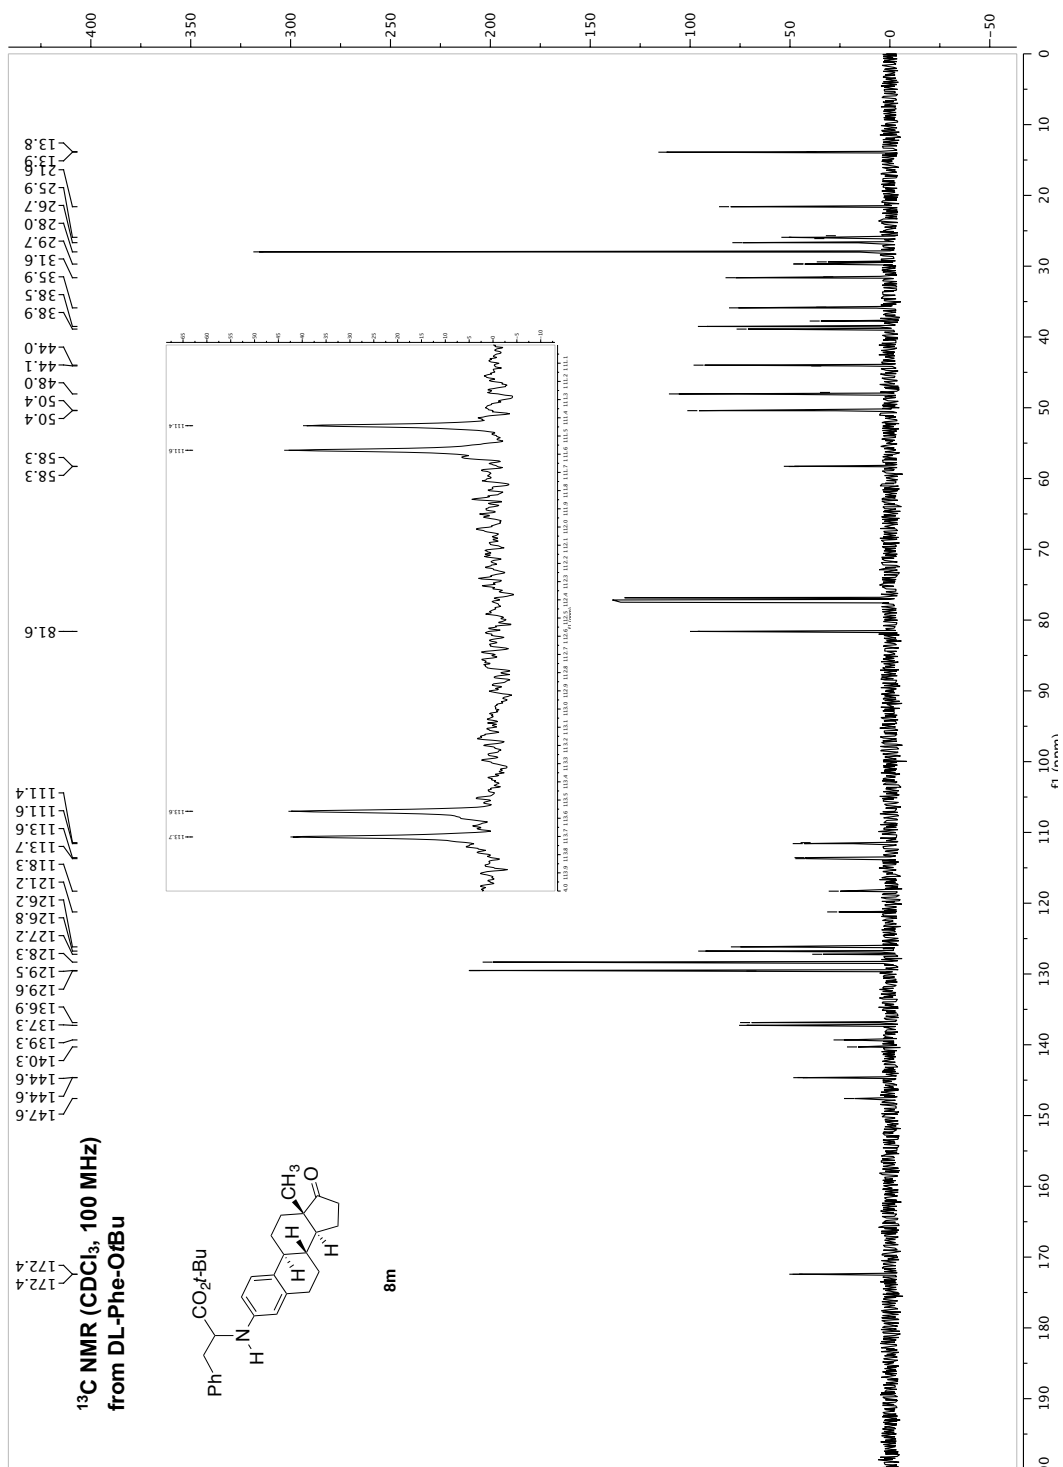

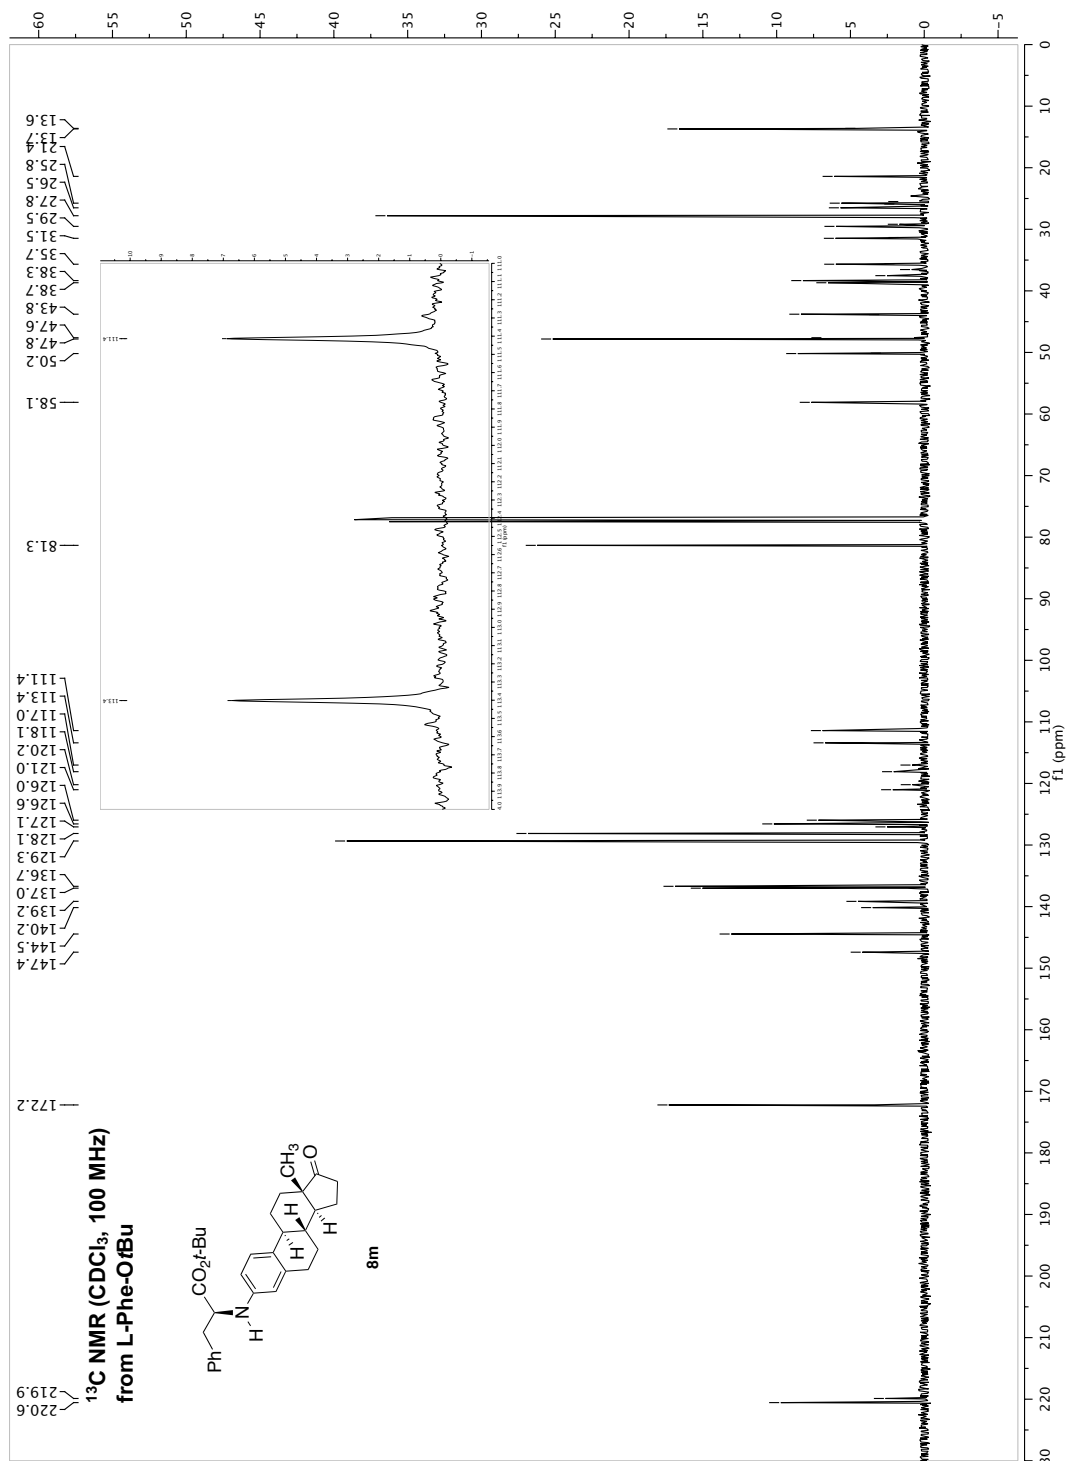

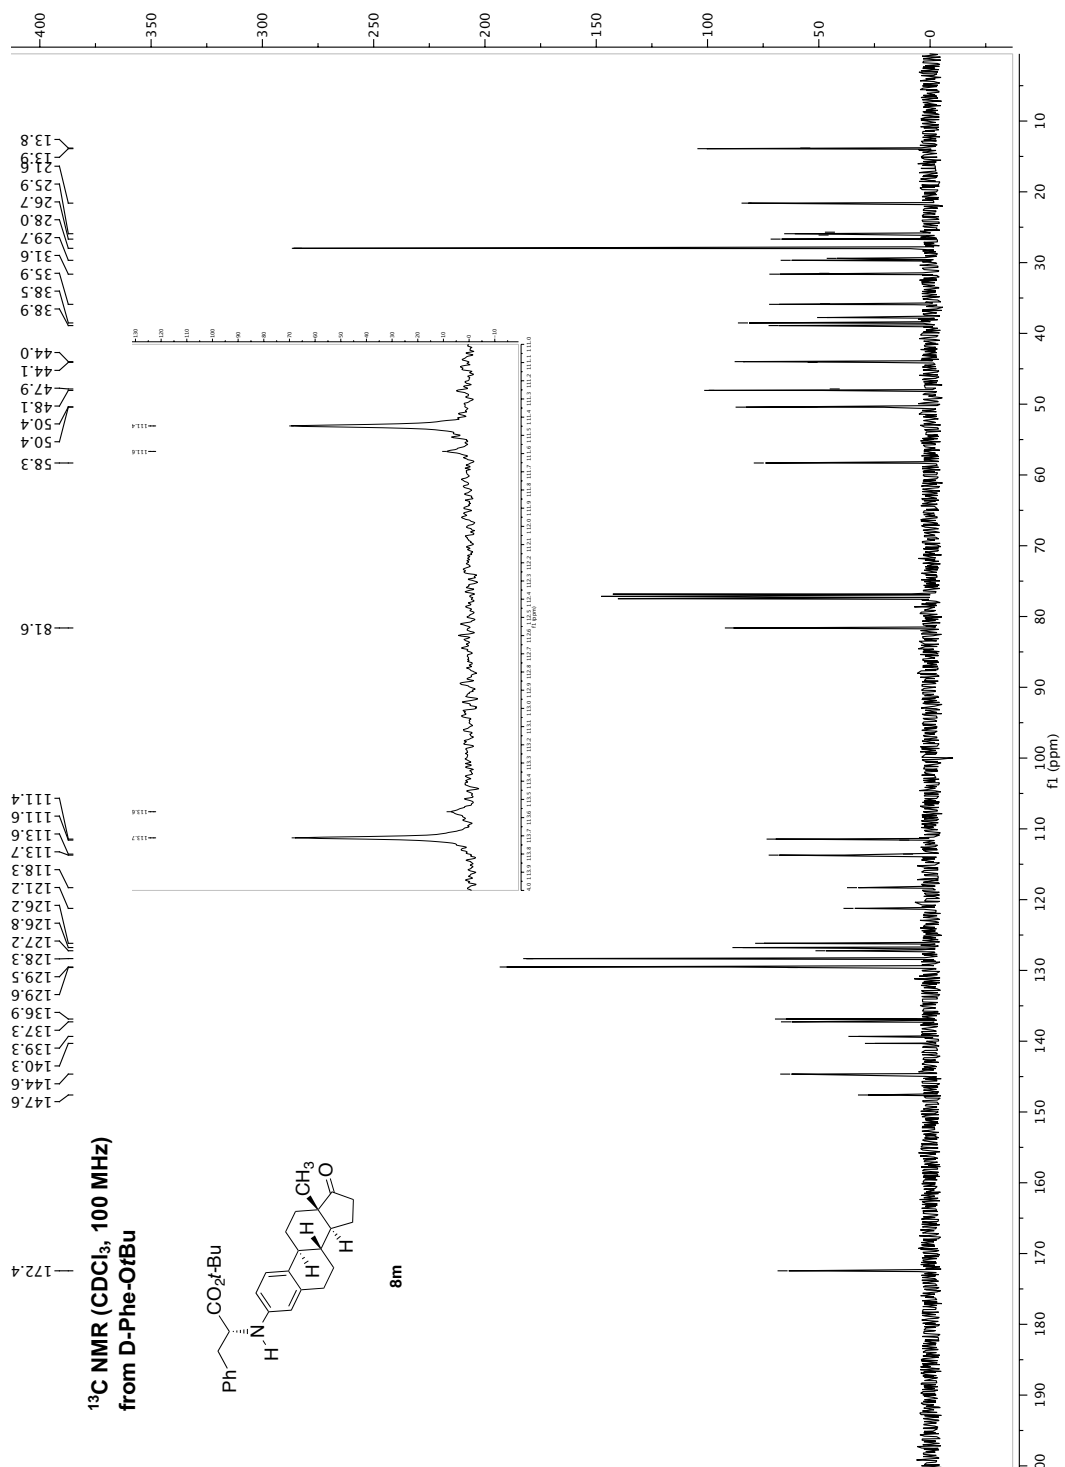

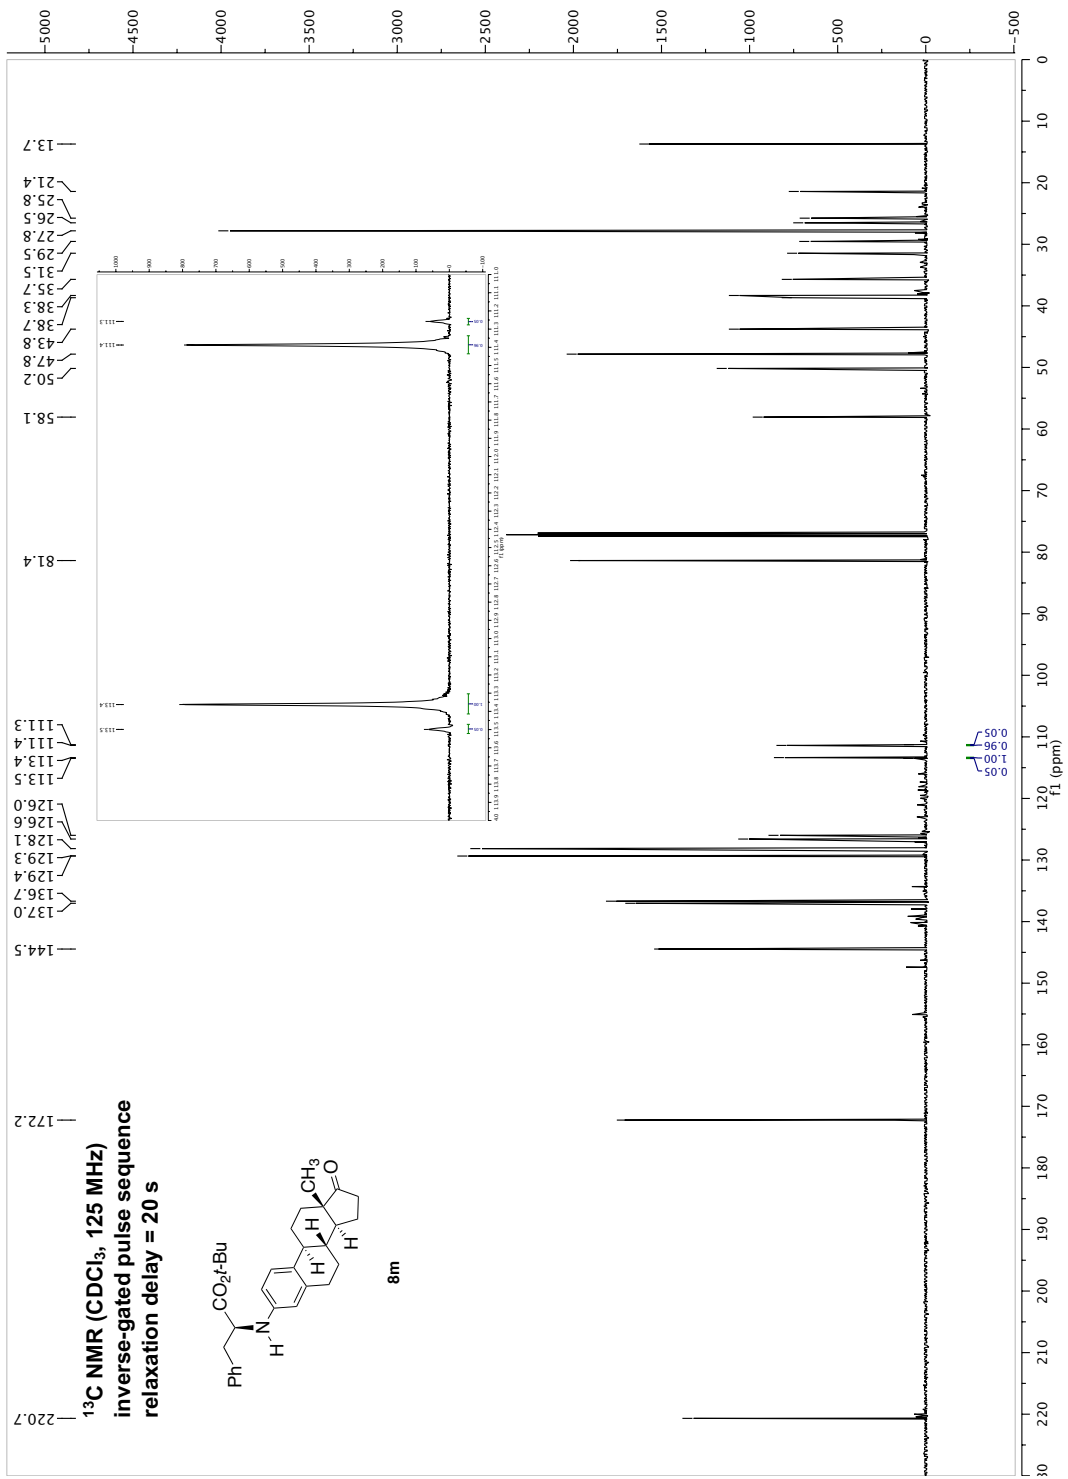

## B) Catalog of HPLC Spectra

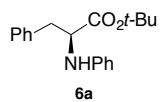

HPLC analysis (OJ-H, 2% IPA–hexanes, 0.8 mL/min, 254 nm) indicated 94% ee: tR (minor) = 14.4 min, tR (major) = 19.0 min.

### DL-6a

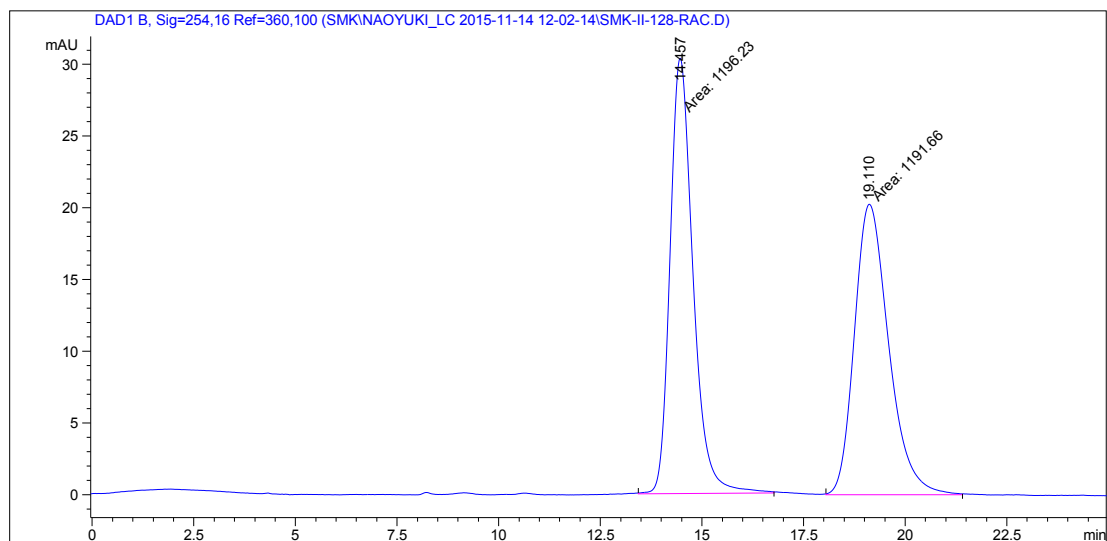

| Peak # | RetTime [min] | Type | Width [min] | Area [mAU*s] | Height [mAU] | Area %  |
|--------|---------------|------|-------------|--------------|--------------|---------|
| 1      | 14.457        | MM T | 0.6566      | 1196.22986   | 30.36582     | 50.0957 |
| 2      | 19.110        | MM T | 0.9799      | 1191.65881   | 20.26895     | 49.9043 |

### L-6a: 94% ee

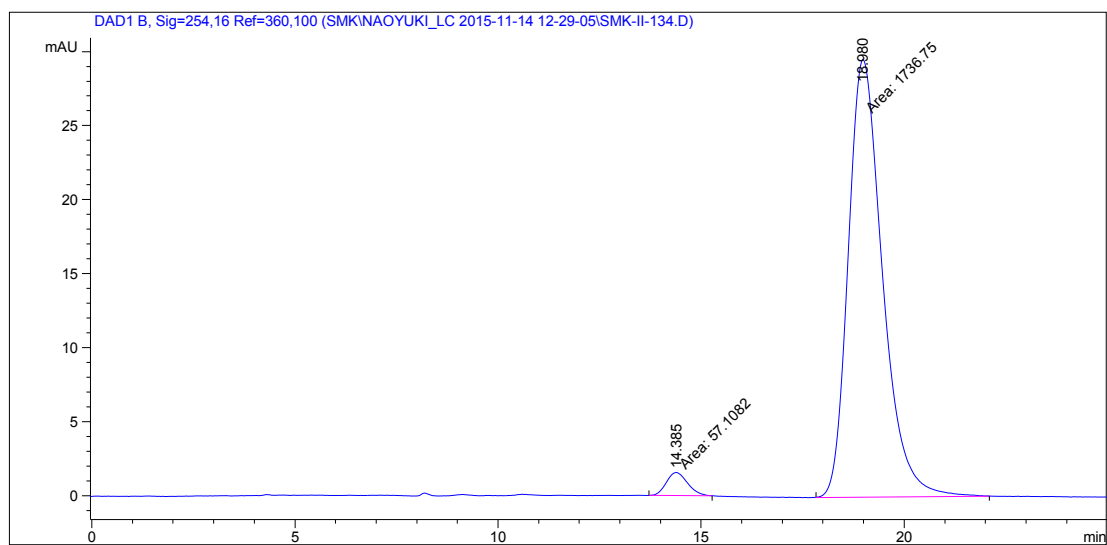

| Peak # | RetTime [min] | Type | Width [min] | Area [mAU*s] | Height [mAU] | Area %  |
|--------|---------------|------|-------------|--------------|--------------|---------|
| 1      | 14.385        | MM T | 0.6089      | 57.10818     | 1.56307      | 3.1835  |
| 2      | 18.980        | MM T | 0.9790      | 1736.74756   | 29.56627     | 96.8165 |



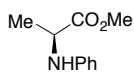

6c

HPLC analysis (OJ-H, 10% IPA–hexanes, 1.0 mL/min, 254 nm) indicated 95% ee: tR (minor) = 16.2 min, tR (major) = 24.2 min.

**DL-6c**

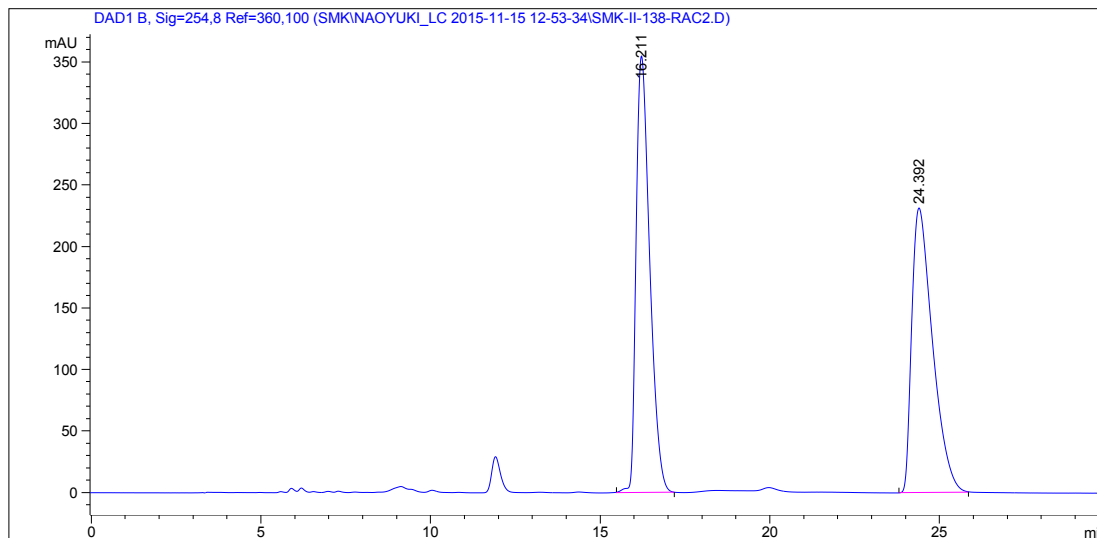

| Peak # | RetTime [min] | Type | Width [min] | Area [mAU*s] | Height [mAU] | Area %  |
|--------|---------------|------|-------------|--------------|--------------|---------|
| 1      | 16.211        | BB   | 0.4341      | 9921.71094   | 354.91168    | 50.1313 |
| 2      | 24.392        | BB   | 0.6515      | 9869.74414   | 231.46831    | 49.8687 |

**L-6c: 95% ee**

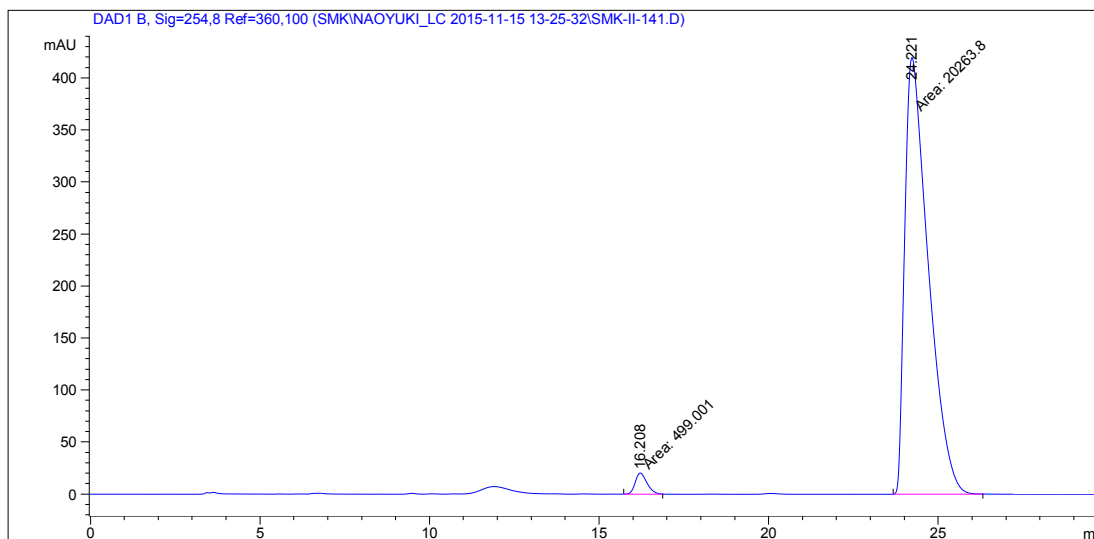

| Peak # | RetTime [min] | Type | Width [min] | Area [mAU*s] | Height [mAU] | Area %  |
|--------|---------------|------|-------------|--------------|--------------|---------|
| 1      | 16.208        | MM T | 0.4076      | 499.00128    | 20.40226     | 2.4033  |
| 2      | 24.221        | MM T | 0.8045      | 2.02638e4    | 419.81766    | 97.5967 |

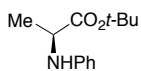

6d

HPLC analysis (OJ-H, 5% IPA–hexanes, 0.8 mL/min, 254 nm) indicated 96% ee: tR (minor) = 8.7 min, tR (major) = 9.3 min.

**DL-6d**

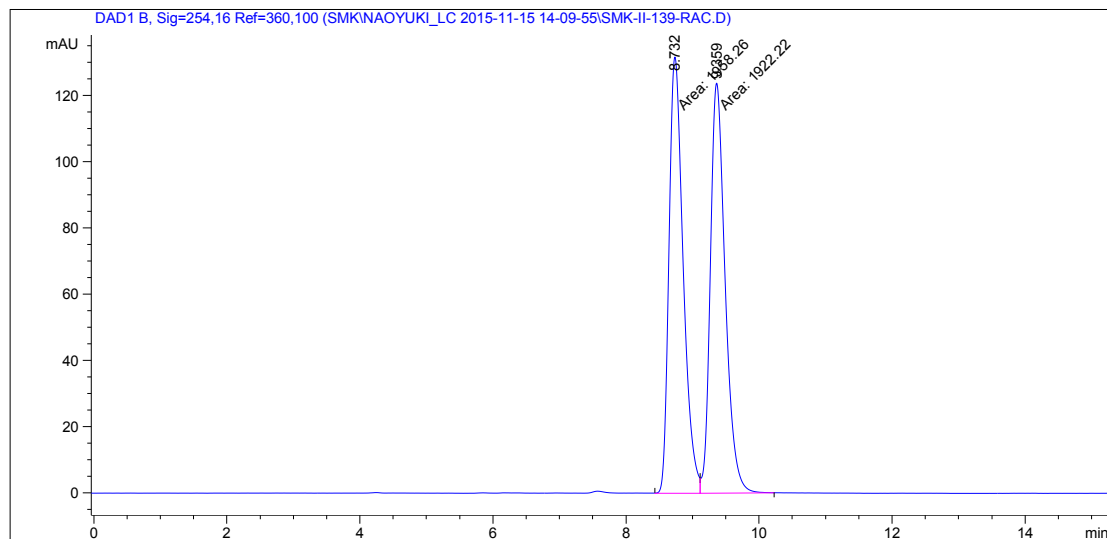

| Peak # | RetTime [min] | Type | Width [min] | Area [mAU*s] | Height [mAU] | Area %  |
|--------|---------------|------|-------------|--------------|--------------|---------|
| 1      | 8.732         | MF T | 0.2475      | 1958.25598   | 131.87755    | 50.4643 |
| 2      | 9.359         | FM T | 0.2585      | 1922.22168   | 123.92563    | 49.5357 |

**L-6d: 96% ee**

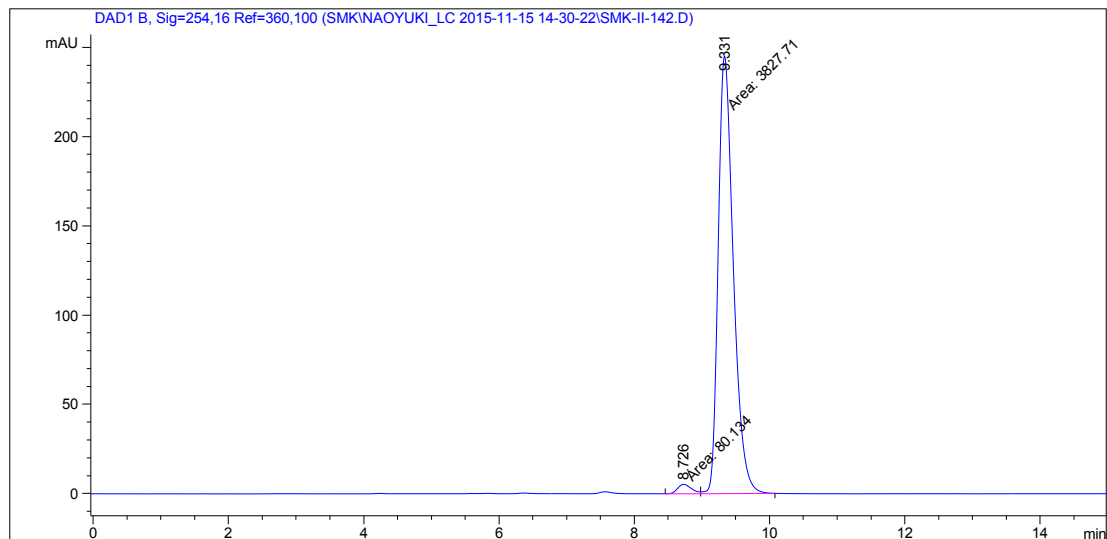

| Peak # | RetTime [min] | Type | Width [min] | Area [mAU*s] | Height [mAU] | Area %  |
|--------|---------------|------|-------------|--------------|--------------|---------|
| 1      | 8.726         | MF T | 0.2472      | 80.13400     | 5.40341      | 2.0506  |
| 2      | 9.331         | FM T | 0.2601      | 3827.71411   | 245.30026    | 97.9494 |

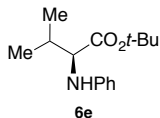

HPLC analysis (OJ-H, 0.5% IPA–hexanes, 0.5 mL/min, 254 nm) indicated 87% ee: tR (major) = 12.3 min, tR (minor) = 13.3 min.

### DL-6e

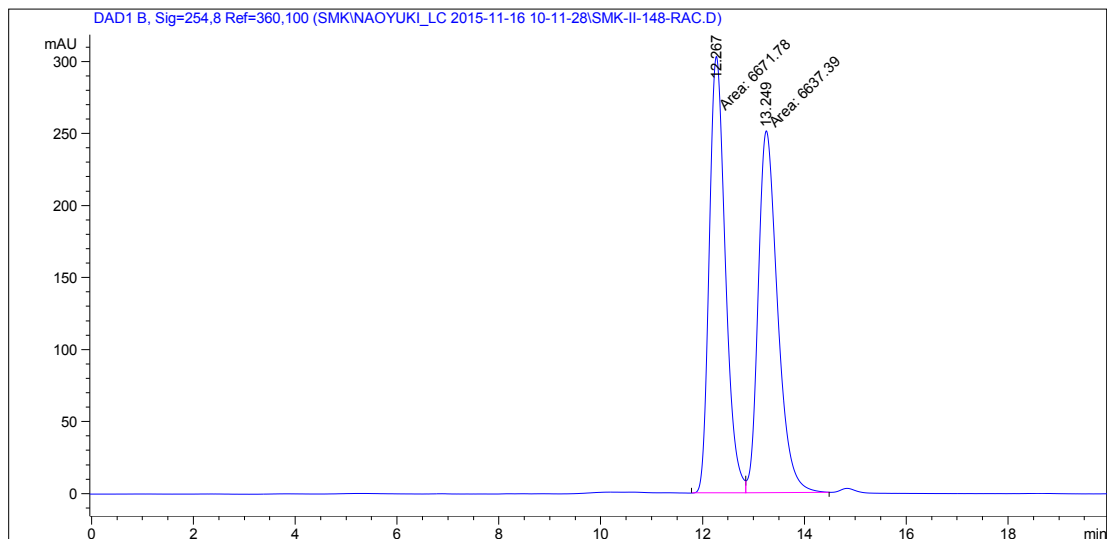

| Peak # | RetTime [min] | Type | Width [min] | Area [mAU*s] | Height [mAU] | Area %  |
|--------|---------------|------|-------------|--------------|--------------|---------|
| 1      | 12.267        | MF T | 0.3669      | 6671.77686   | 303.05771    | 50.1292 |
| 2      | 13.249        | FM T | 0.4403      | 6637.38916   | 251.25612    | 49.8708 |

### L-6e: 87% ee

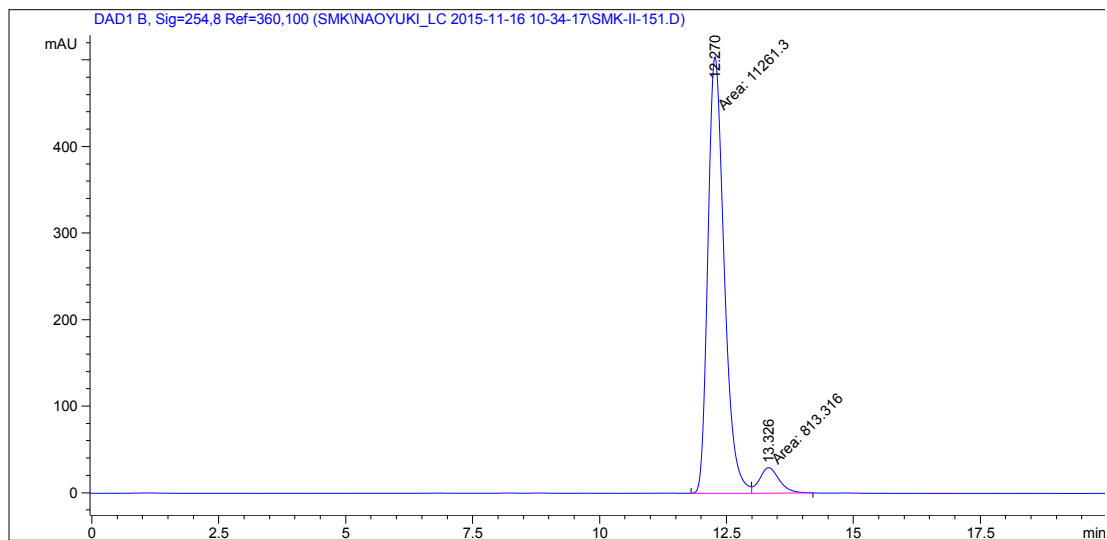

| Peak # | RetTime [min] | Type | Width [min] | Area [mAU*s] | Height [mAU] | Area %  |
|--------|---------------|------|-------------|--------------|--------------|---------|
| 1      | 12.270        | MF T | 0.3721      | 1.12613e4    | 504.38626    | 93.2643 |
| 2      | 13.326        | FM T | 0.4577      | 813.31567    | 29.61808     | 6.7357  |

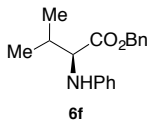

HPLC analysis (OJ-H, 10% IPA–hexanes, 1.0 mL/min, 254 nm) indicated 94% ee: tR (minor) = 19.0 min, tR (major) = 24.0 min.

### DL-6f

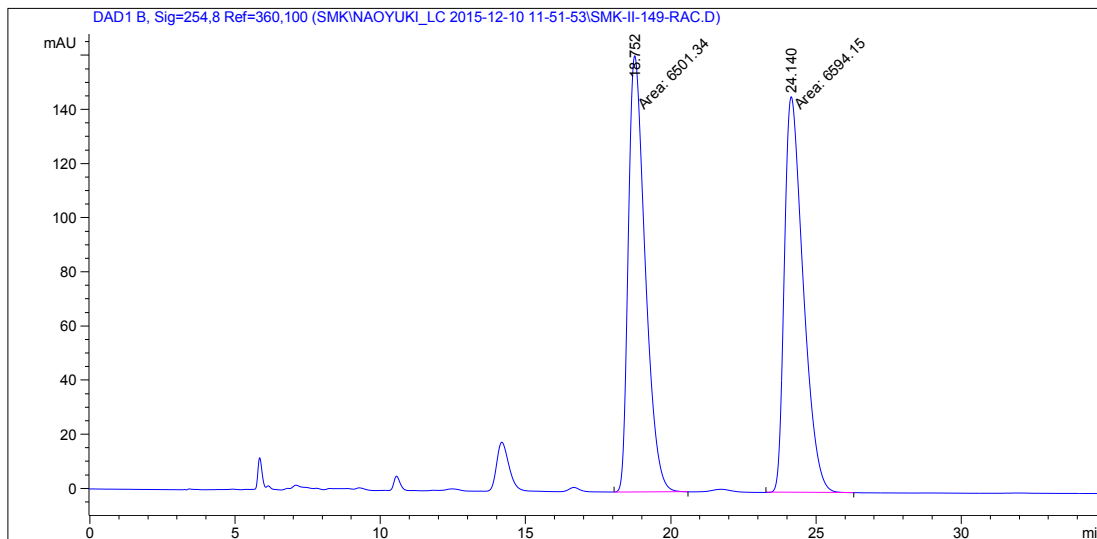

| Peak # | RetTime [min] | Type | Width [min] | Area [mAU*s] | Height [mAU] | Area %  |
|--------|---------------|------|-------------|--------------|--------------|---------|
| 1      | 18.752        | MM T | 0.6722      | 6501.33789   | 161.18393    | 49.6456 |
| 2      | 24.140        | MM T | 0.7516      | 6594.14844   | 146.21629    | 50.3544 |

### L-6f: 94% ee

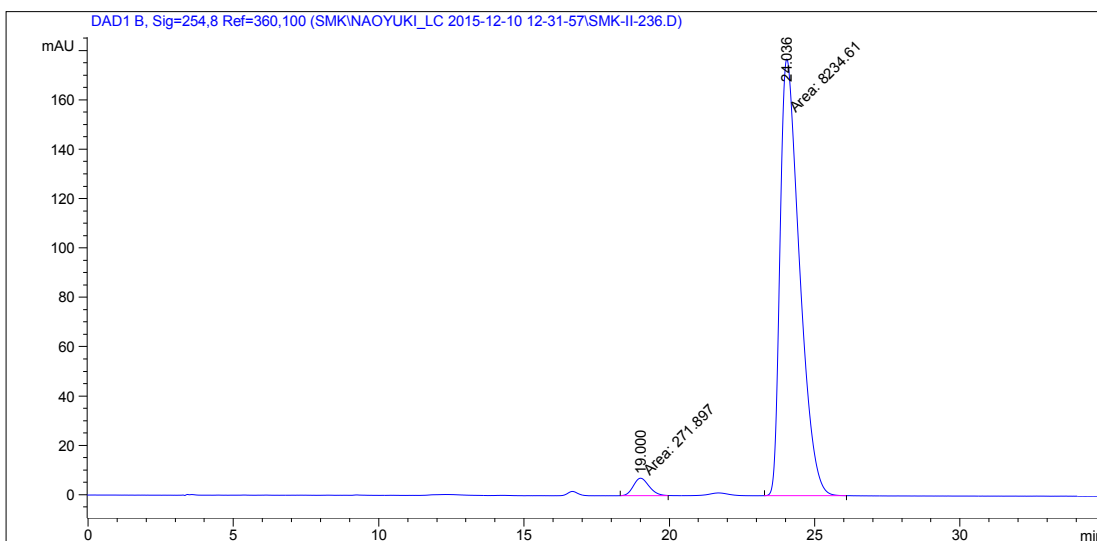

| Peak # | RetTime [min] | Type | Width [min] | Area [mAU*s] | Height [mAU] | Area %  |
|--------|---------------|------|-------------|--------------|--------------|---------|
| 1      | 19.000        | MM T | 0.6356      | 271.89746    | 7.12991      | 3.1963  |
| 2      | 24.036        | MM T | 0.7751      | 8234.60547   | 177.05835    | 96.8037 |

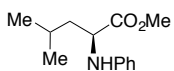

6g

HPLC analysis (OJ-H, 5% IPA–hexanes, 0.8 mL/min, 254 nm) indicated 96% ee: tR (minor) = 10.2 min, tR (major) = 15.0 min.

### DL-6g

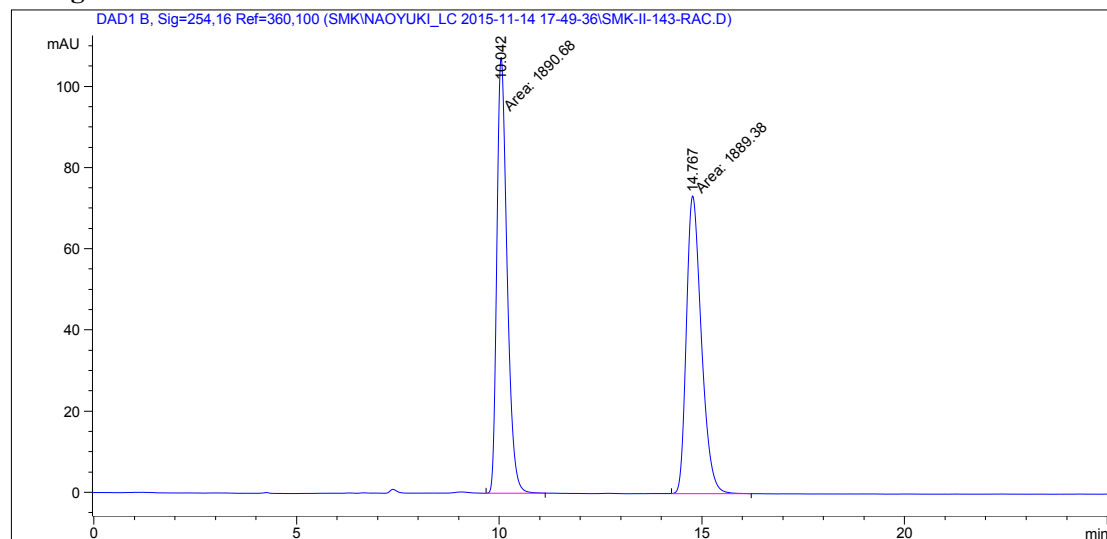

| Peak # | RetTime [min] | Type | Width [min] | Area [mAU*s] | Height [mAU] | Area %  |
|--------|---------------|------|-------------|--------------|--------------|---------|
| 1      | 10.042        | MM T | 0.2932      | 1890.68164   | 107.46779    | 50.0173 |
| 2      | 14.767        | MM T | 0.4291      | 1889.37646   | 73.38699     | 49.9827 |

### L-6g: 96% ee

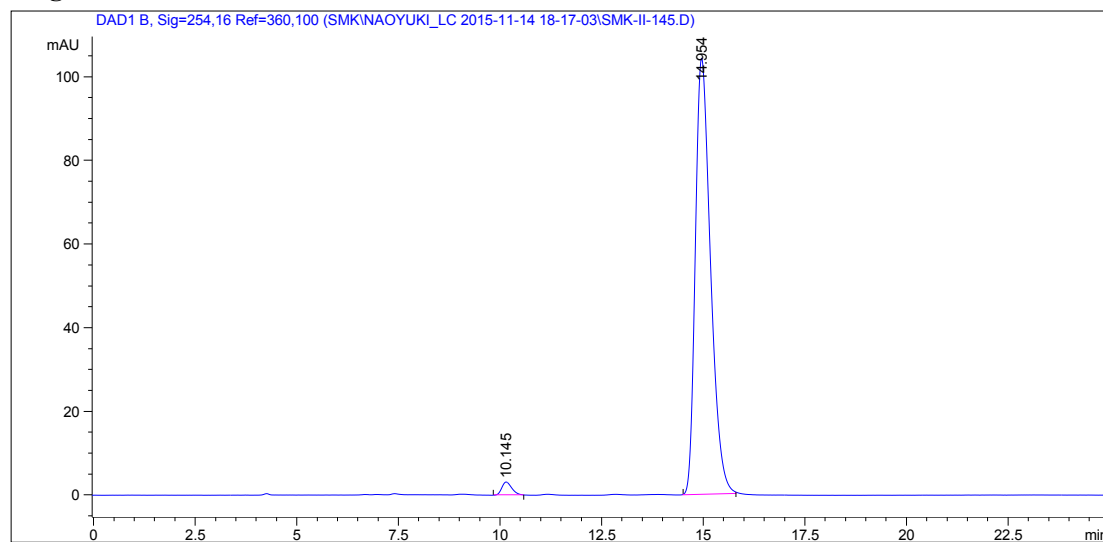

| Peak # | RetTime [min] | Type | Width [min] | Area [mAU*s] | Height [mAU] | Area %  |
|--------|---------------|------|-------------|--------------|--------------|---------|
| 1      | 10.145        | BB   | 0.2609      | 54.09112     | 3.14050      | 1.9569  |
| 2      | 14.954        | BB   | 0.3992      | 2710.00024   | 104.27953    | 98.0431 |

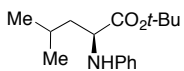

6h

HPLC analysis (OJ-H, 1% IPA–hexanes, 0.8 mL/min, 254 nm) indicated 97% ee: tR (minor) = 6.3 min, tR (major) = 7.0 min.

### DL-6h

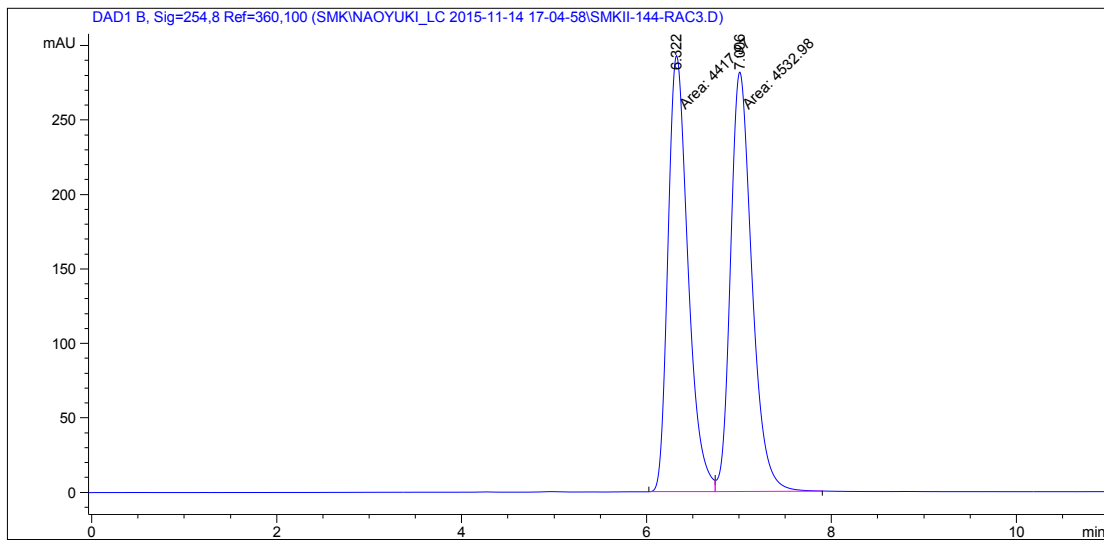

| Peak # | RetTime [min] | Type | Width [min] | Area [mAU*s] | Height [mAU] | Area %  |
|--------|---------------|------|-------------|--------------|--------------|---------|
| 1      | 6.322         | MF T | 0.2513      | 4417.97314   | 292.96231    | 49.3576 |
| 2      | 7.006         | FM T | 0.2681      | 4532.97559   | 281.83261    | 50.6424 |

### L-6h: 97% ee

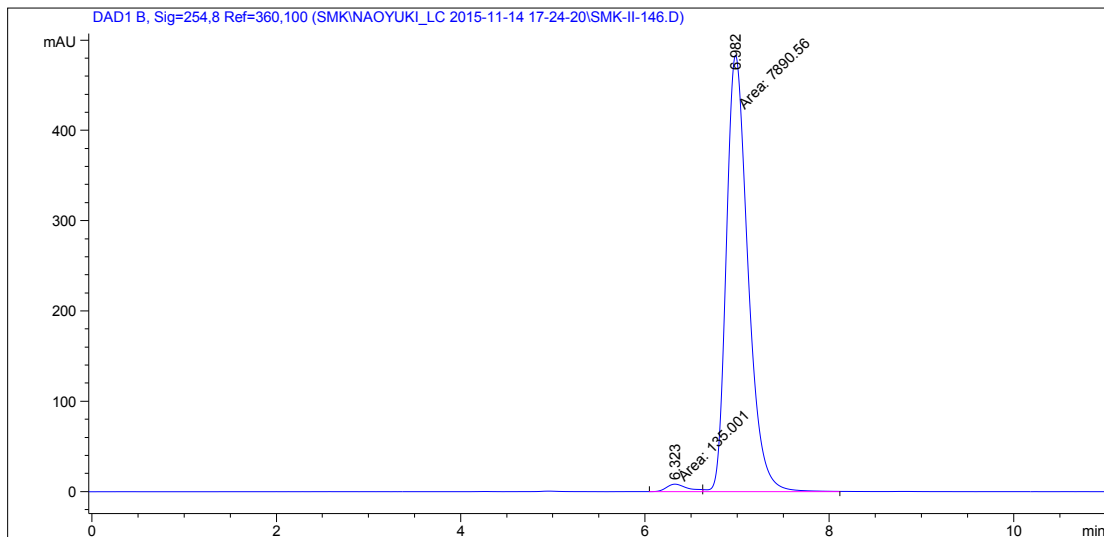

| Peak # | RetTime [min] | Type | Width [min] | Area [mAU*s] | Height [mAU] | Area %  |
|--------|---------------|------|-------------|--------------|--------------|---------|
| 1      | 6.323         | MF T | 0.2697      | 135.00081    | 8.34301      | 1.6821  |
| 2      | 6.982         | FM T | 0.3253      | 7890.55957   | 483.25766    | 98.3179 |

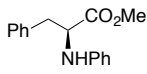

6i

HPLC analysis (OJ-H, 10% IPA–hexanes, 1.0 mL/min, 254 nm) indicated 87% ee: tR (minor) = 30.7 min, tR (major) = 42.8 min.

**DL-6i**

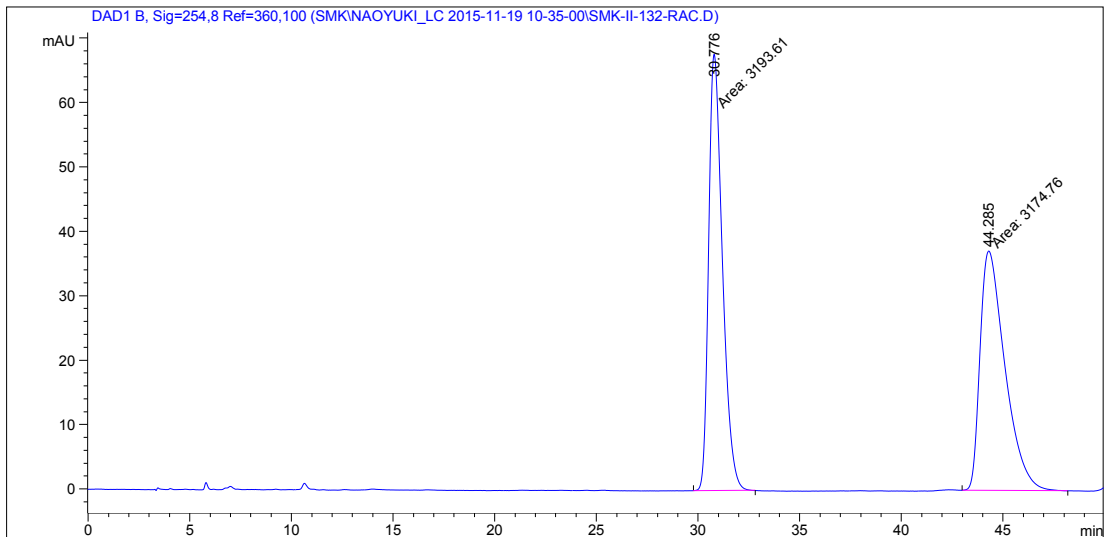

| Peak # | RetTime [min] | Type | Width [min] | Area [mAU*s] | Height [mAU] | Area %  |
|--------|---------------|------|-------------|--------------|--------------|---------|
| 1      | 30.776        | MM T | 0.7855      | 3193.60840   | 67.76417     | 50.1480 |
| 2      | 44.285        | MM T | 1.4228      | 3174.75586   | 37.18823     | 49.8520 |

**L-6i: 87% ee**

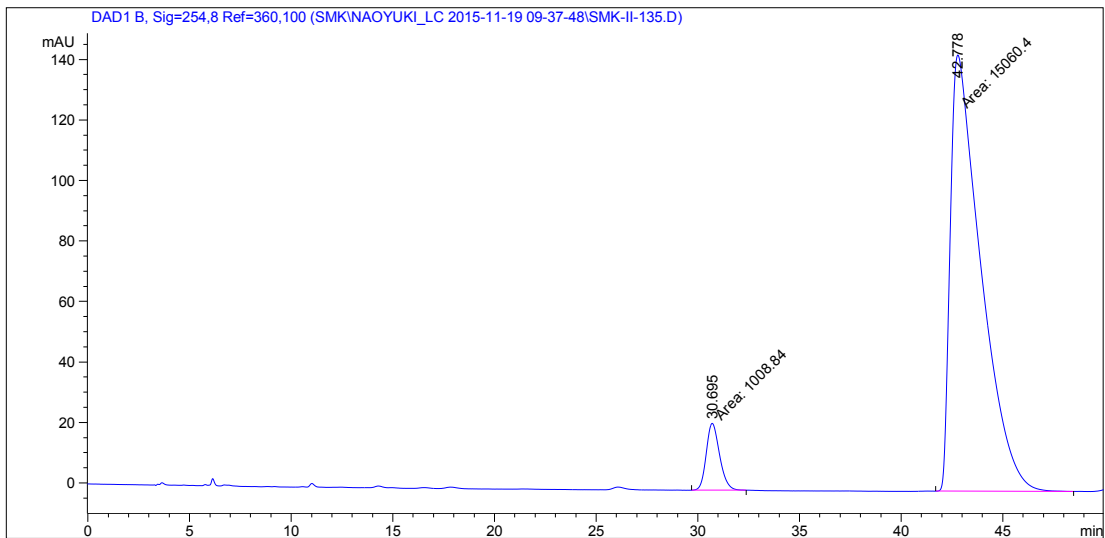

| Peak # | RetTime [min] | Type | Width [min] | Area [mAU*s] | Height [mAU] | Area %  |
|--------|---------------|------|-------------|--------------|--------------|---------|
| 1      | 30.695        | MM T | 0.7608      | 1008.83502   | 22.10026     | 6.2780  |
| 2      | 42.778        | MM T | 1.7406      | 1.50604e4    | 144.20990    | 93.7220 |

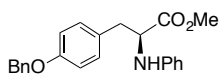

6j

HPLC analysis (OD-H, 10% IPA–hexanes, 1.0 mL/min, 254 nm) indicated 96% ee: tR (major) = 29.8 min, tR (minor) = 54.4 min.

### DL-6j

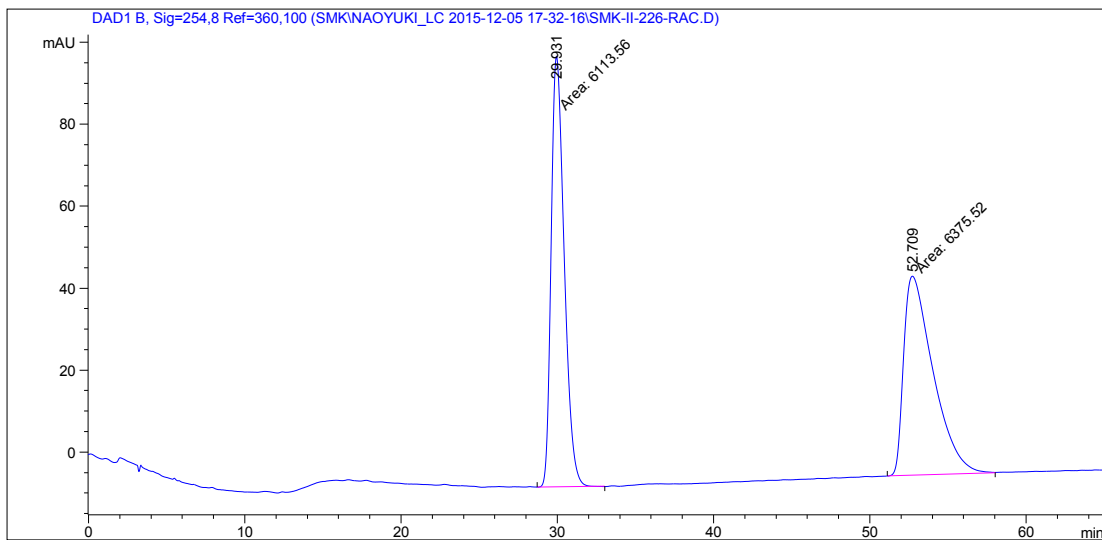

| Peak # | RetTime [min] | Type | Width [min] | Area [mAU*s] | Height [mAU] | Area %  |
|--------|---------------|------|-------------|--------------|--------------|---------|
| 1      | 29.931        | MM T | 0.9698      | 6113.56494   | 105.06756    | 48.9513 |
| 2      | 52.709        | MM T | 2.1865      | 6375.51855   | 48.59669     | 51.0487 |

### L-6j: 96% ee

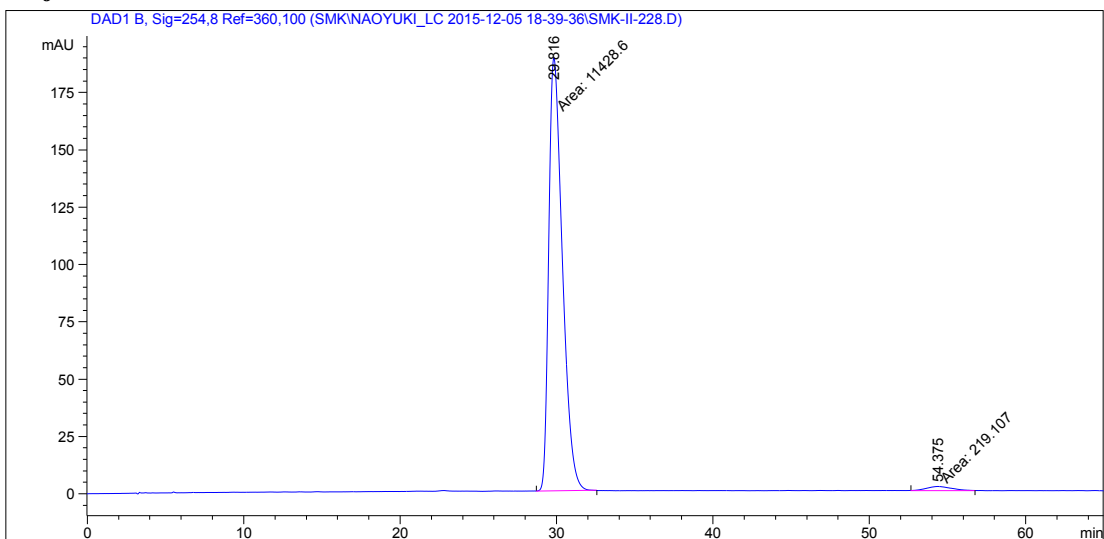

| Peak # | RetTime [min] | Type | Width [min] | Area [mAU*s] | Height [mAU] | Area %  |
|--------|---------------|------|-------------|--------------|--------------|---------|
| 1      | 29.816        | MM T | 1.0084      | 1.14286e4    | 188.89705    | 98.1189 |
| 2      | 54.375        | MM T | 1.9436      | 219.10712    | 1.87883      | 1.8811  |



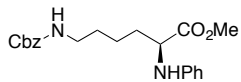

6k

HPLC analysis (OD-H, 20% IPA–hexanes, 1.0 mL/min, 254 nm) indicated 94% ee: tR (major) = 19.7 min, tR (minor) = 40.3 min.

### DL-6k

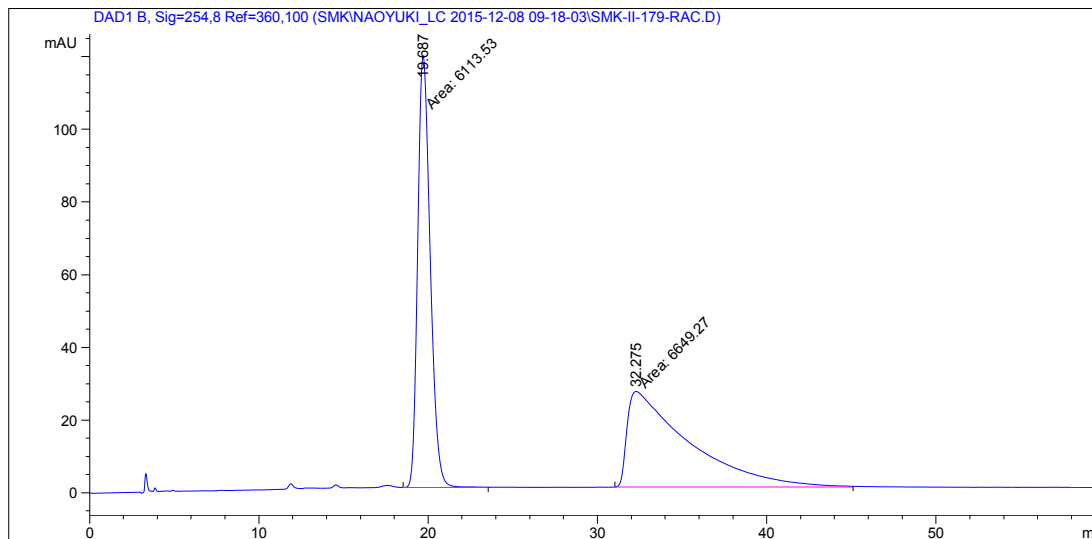

| Peak # | RetTime [min] | Type | Width [min] | Area [mAU*s] | Height [mAU] | Area %  |
|--------|---------------|------|-------------|--------------|--------------|---------|
| 1      | 19.687        | MM T | 0.8580      | 6113.52637   | 118.76188    | 47.9011 |
| 2      | 32.275        | MM T | 4.2124      | 6649.27490   | 26.30807     | 52.0989 |

### L-6k: 94%

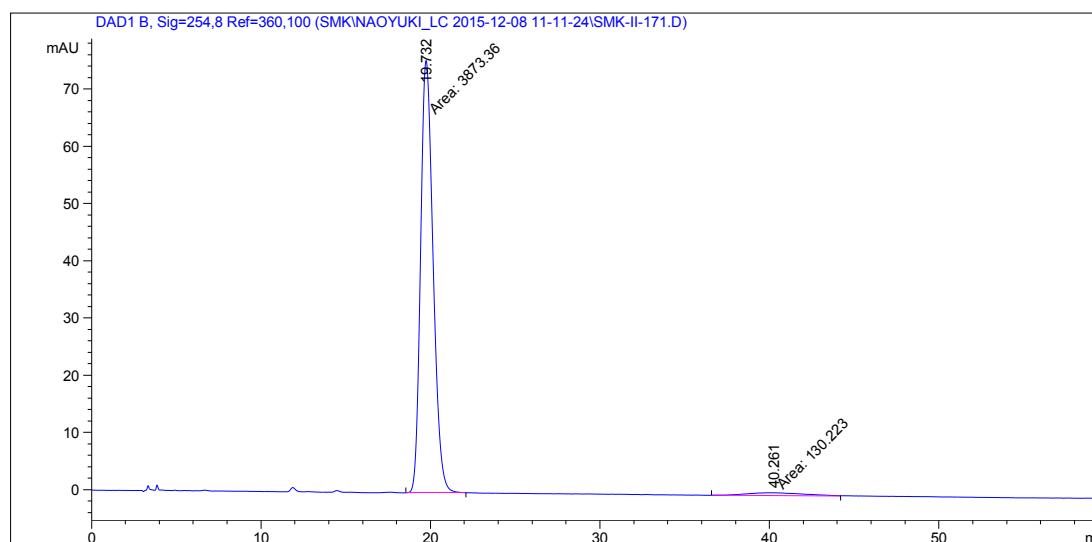

| Peak # | RetTime [min] | Type | Width [min] | Area [mAU*s] | Height [mAU] | Area %  |
|--------|---------------|------|-------------|--------------|--------------|---------|
| 1      | 19.732        | MM T | 0.8546      | 3873.36255   | 75.53883     | 96.7473 |
| 2      | 40.261        | MM T | 4.1188      | 130.22308    | 5.26940e-1   | 3.2527  |

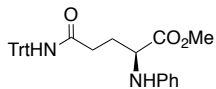

6l

HPLC analysis (AD-H, 10% IPA–hexanes, 1.0 mL/min, 254 nm) indicated 92% ee: tR (minor) = 10.5 min, tR (major) = 30.1 min.

**DL-6l**

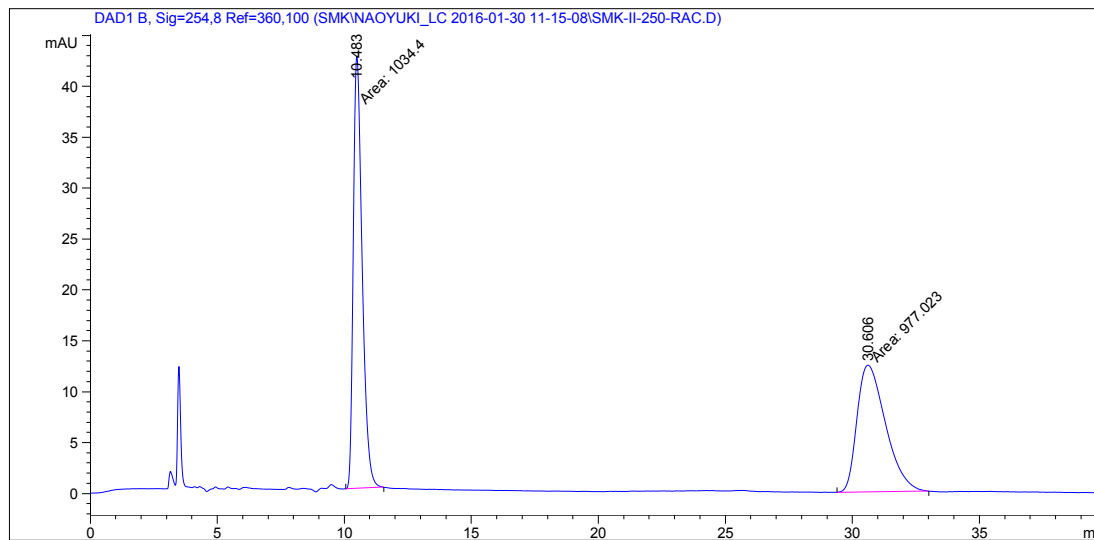

| Peak # | RetTime [min] | Type | Width [min] | Area [mAU*s] | Height [mAU] | Area %  |
|--------|---------------|------|-------------|--------------|--------------|---------|
| 1      | 10.483        | MM T | 0.4058      | 1034.40479   | 42.48903     | 51.4264 |
| 2      | 30.606        | MM T | 1.3053      | 977.02319    | 12.47537     | 48.5736 |

**L-6l: 92%**

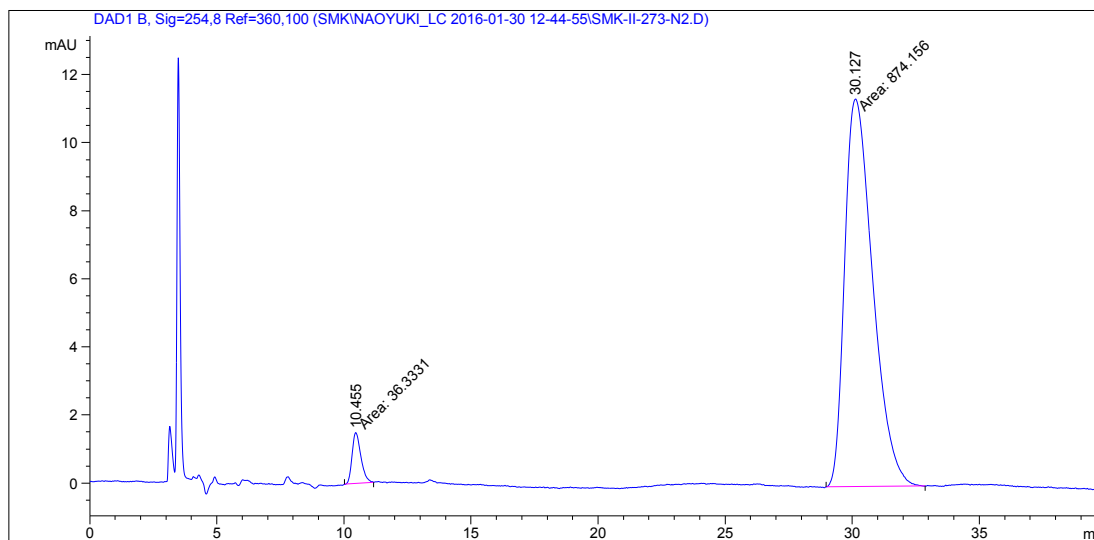

| Peak # | RetTime [min] | Type | Width [min] | Area [mAU*s] | Height [mAU] | Area %  |
|--------|---------------|------|-------------|--------------|--------------|---------|
| 1      | 10.455        | MM T | 0.4036      | 36.33312     | 1.50054      | 3.9905  |
| 2      | 30.127        | MM T | 1.2795      | 874.15619    | 11.38695     | 96.0095 |

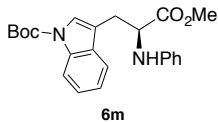

HPLC analysis (OJ-H, 10% IPA–hexanes, 1.0 mL/min, 254 nm) indicated 93% ee: tR (major) = 13.4 min, tR (minor) = 16.7 min.

### DL-6m

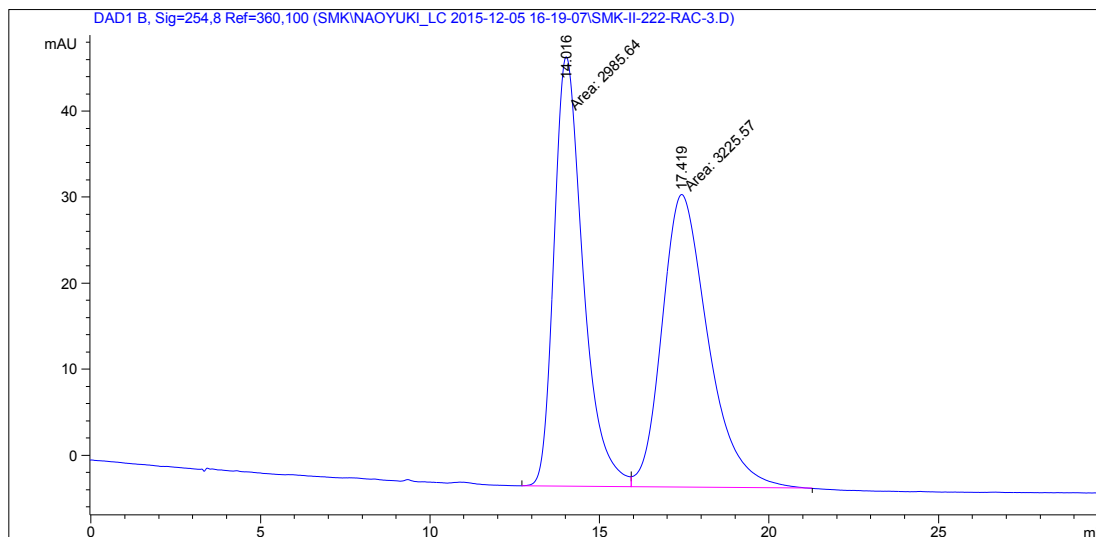

| Peak # | RetTime [min] | Type | Width [min] | Area [mAU*s] | Height [mAU] | Area %  |
|--------|---------------|------|-------------|--------------|--------------|---------|
| 1      | 14.016        | MF T | 0.9965      | 2985.64014   | 49.93752     | 48.0686 |
| 2      | 17.419        | FM T | 1.5793      | 3225.56665   | 34.03899     | 51.9314 |

### L-6m: 93% ee

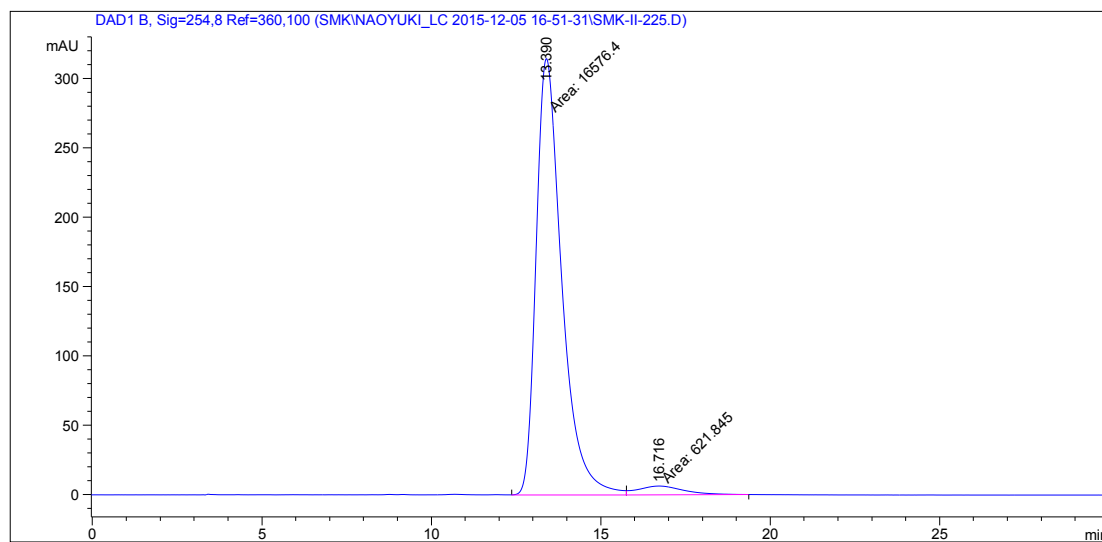

| Peak # | RetTime [min] | Type | Width [min] | Area [mAU*s] | Height [mAU] | Area %  |
|--------|---------------|------|-------------|--------------|--------------|---------|
| 1      | 13.390        | MF T | 0.8785      | 1.65764e4    | 314.49765    | 96.3843 |
| 2      | 16.716        | FM T | 1.6117      | 621.84534    | 6.43063      | 3.6157  |

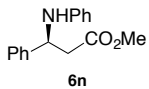

HPLC analysis (OD-H, 5% IPA–hexanes, 0.8 mL/min, 254 nm) indicated 99% ee: tR (major) = 19.8 min, tR (minor) = 21.6 min.

### DL-6n

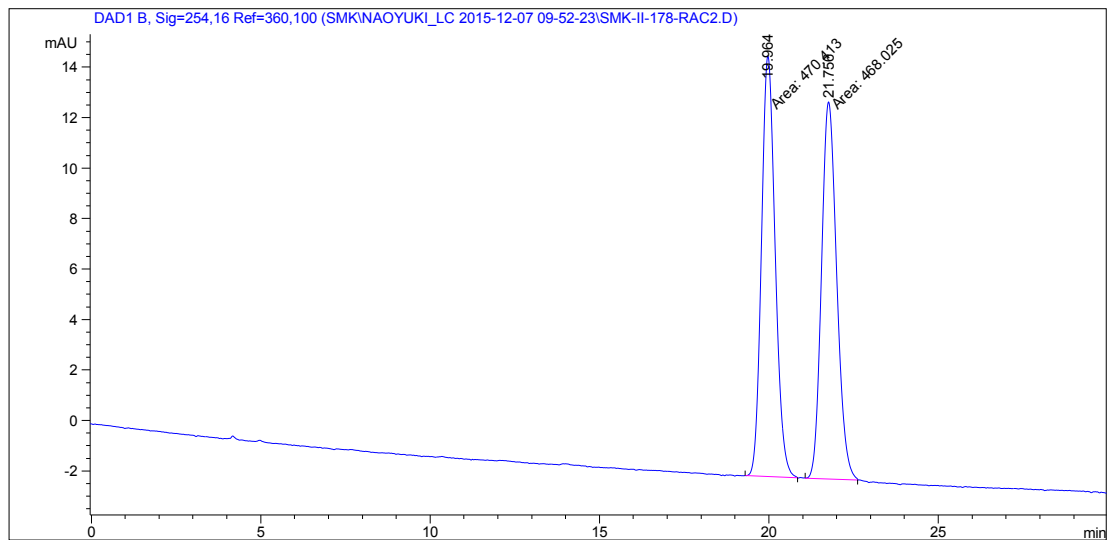

| Peak # | RetTime [min] | Type | Width [min] | Area [mAU*s] | Height [mAU] | Area %  |
|--------|---------------|------|-------------|--------------|--------------|---------|
| 1      | 19.964        | MM T | 0.4703      | 470.41306    | 16.67086     | 50.1272 |
| 2      | 21.756        | MM T | 0.5217      | 468.02487    | 14.95182     | 49.8728 |

### L-6n: 99% ee

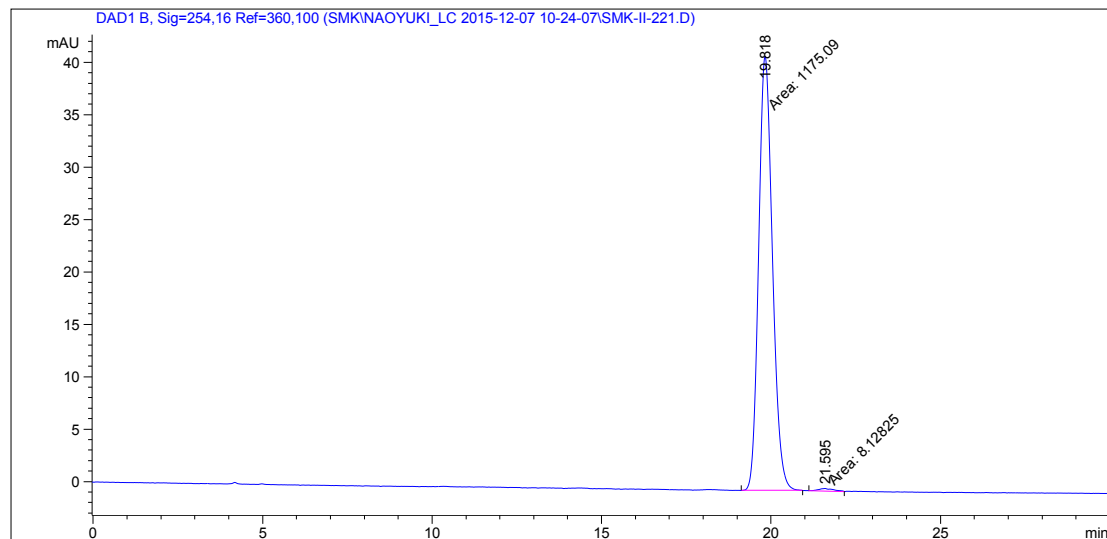

| Peak # | RetTime [min] | Type | Width [min] | Area [mAU*s] | Height [mAU] | Area %  |
|--------|---------------|------|-------------|--------------|--------------|---------|
| 1      | 19.818        | MM T | 0.4728      | 1175.09338   | 41.42310     | 99.3130 |
| 2      | 21.595        | MM T | 0.5334      | 8.12825      | 2.53999e-1   | 0.6870  |

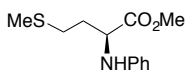

6o

HPLC analysis (OJ-H, 10% IPA–hexanes, 1.0 mL/min, 254 nm) indicated 80% ee: tR (minor) = 20.3 min, tR (major) = 29.6 min.

### DL-6o

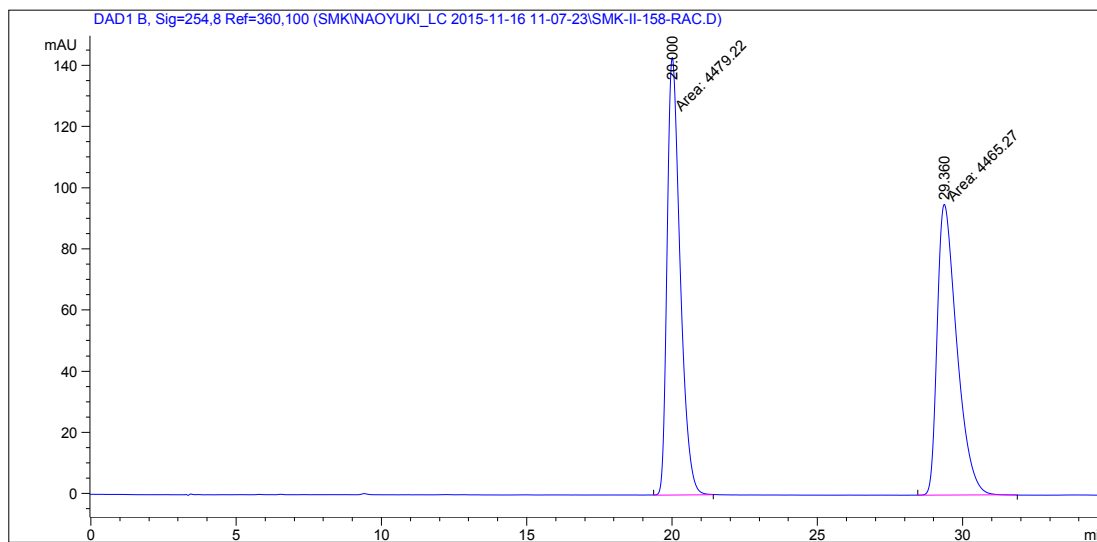

| Peak # | RetTime [min] | Type | Width [min] | Area [mAU*s] | Height [mAU] | Area %  |
|--------|---------------|------|-------------|--------------|--------------|---------|
| 1      | 20.000        | MM T | 0.5215      | 4479.21973   | 143.14674    | 50.0780 |
| 2      | 29.360        | MM T | 0.7828      | 4465.26514   | 95.07150     | 49.9220 |

### L-6o: 80% ee

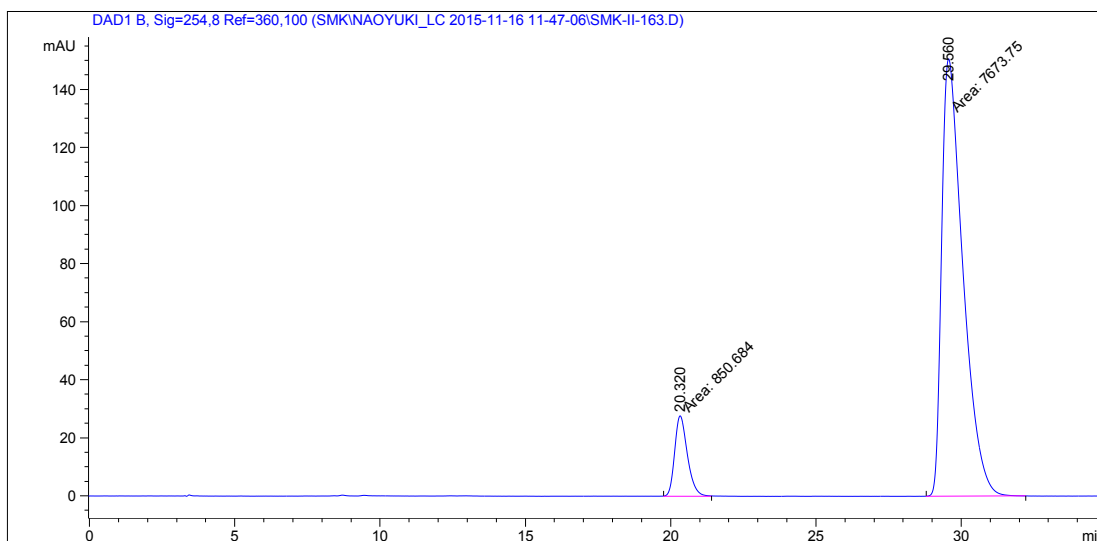

| Peak # | RetTime [min] | Type | Width [min] | Area [mAU*s] | Height [mAU] | Area %  |
|--------|---------------|------|-------------|--------------|--------------|---------|
| 1      | 20.320        | MM T | 0.5105      | 850.68414    | 27.77098     | 9.9794  |
| 2      | 29.660        | MM T | 0.8488      | 7673.74561   | 150.67964    | 90.0206 |

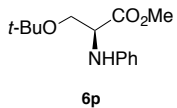

HPLC analysis (OJ-H, 10% IPA–hexanes, 1.0 mL/min, 254 nm) indicated 71% ee: tR (minor) = 7.1 min, tR (major) = 10.9 min.

### DL-6p

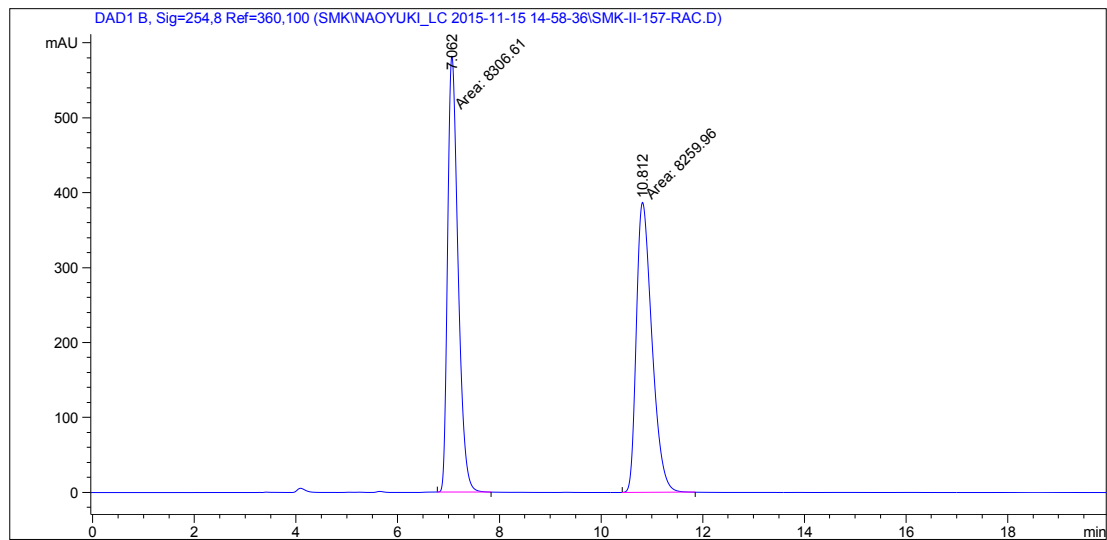

| Peak # | RetTime [min] | Type | Width [min] | Area [mAU*s] | Height [mAU] | Area %  |
|--------|---------------|------|-------------|--------------|--------------|---------|
| 1      | 7.062         | MM T | 0.2377      | 8306.60547   | 582.36609    | 50.1408 |
| 2      | 10.812        | MM T | 0.3553      | 8259.96094   | 387.49521    | 49.8592 |

### L-6p: 71% ee

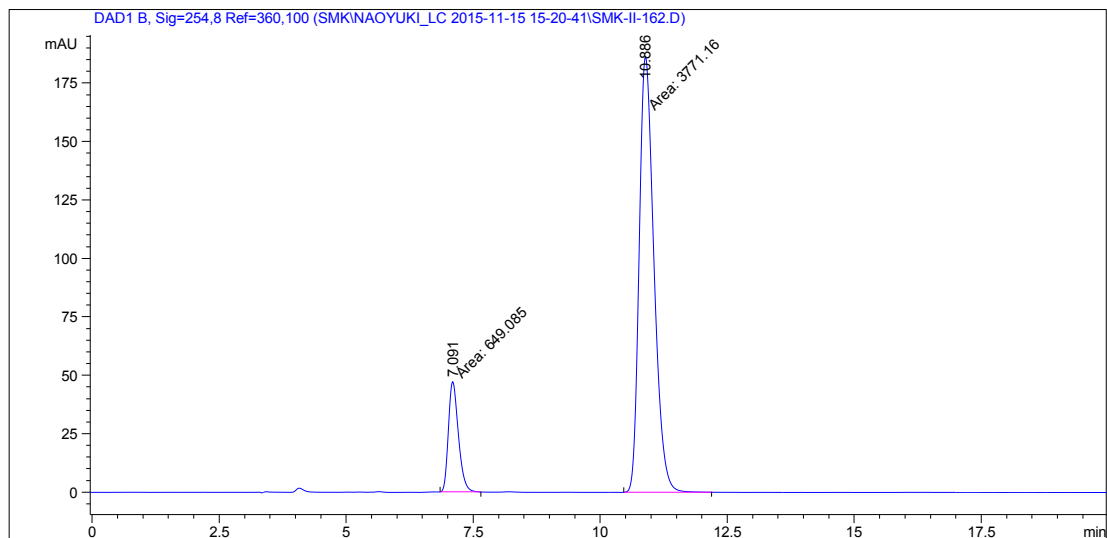

| Peak # | RetTime [min] | Type | Width [min] | Area [mAU*s] | Height [mAU] | Area %  |
|--------|---------------|------|-------------|--------------|--------------|---------|
| 1      | 7.091         | MM T | 0.2289      | 649.08466    | 47.25744     | 14.6844 |
| 2      | 10.886        | MM T | 0.3371      | 3771.16309   | 186.42711    | 85.3156 |

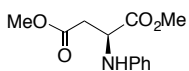

6q

HPLC analysis (OJ-H, 10% IPA–hexanes, 1.0 mL/min, 254 nm) indicated 74% ee: tR (minor) = 34.0 min, tR (major) = 58.1 min.

### DL-6q

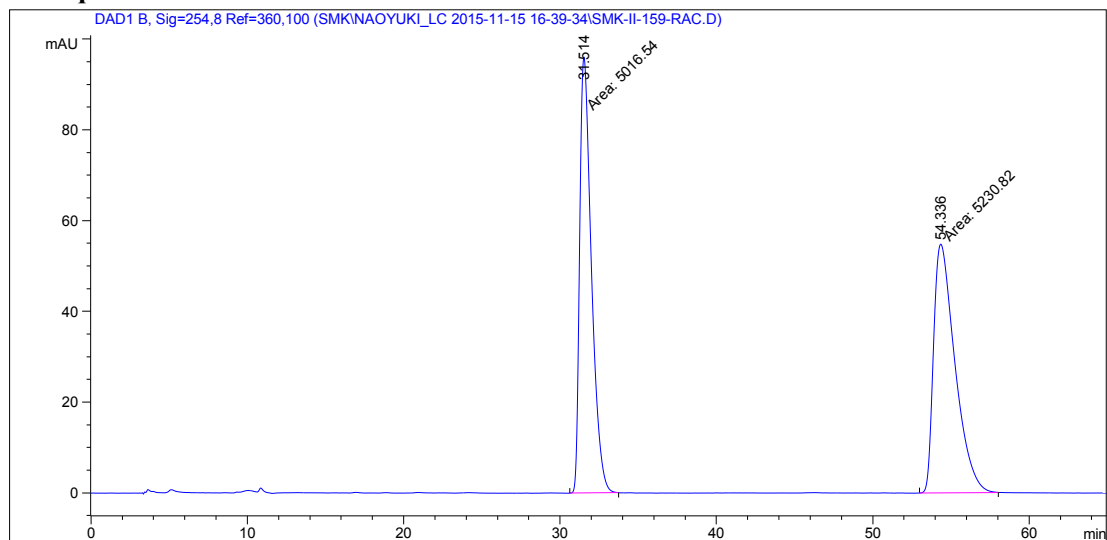

| Peak # | RetTime [min] | Type | Width [min] | Area [mAU*s] | Height [mAU] | Area %  |
|--------|---------------|------|-------------|--------------|--------------|---------|
| 1      | 31.514        | MM T | 0.8702      | 5016.53857   | 96.08055     | 48.9545 |
| 2      | 54.336        | MM T | 1.5890      | 5230.82080   | 54.86498     | 51.0455 |

### L-6q: 74% ee

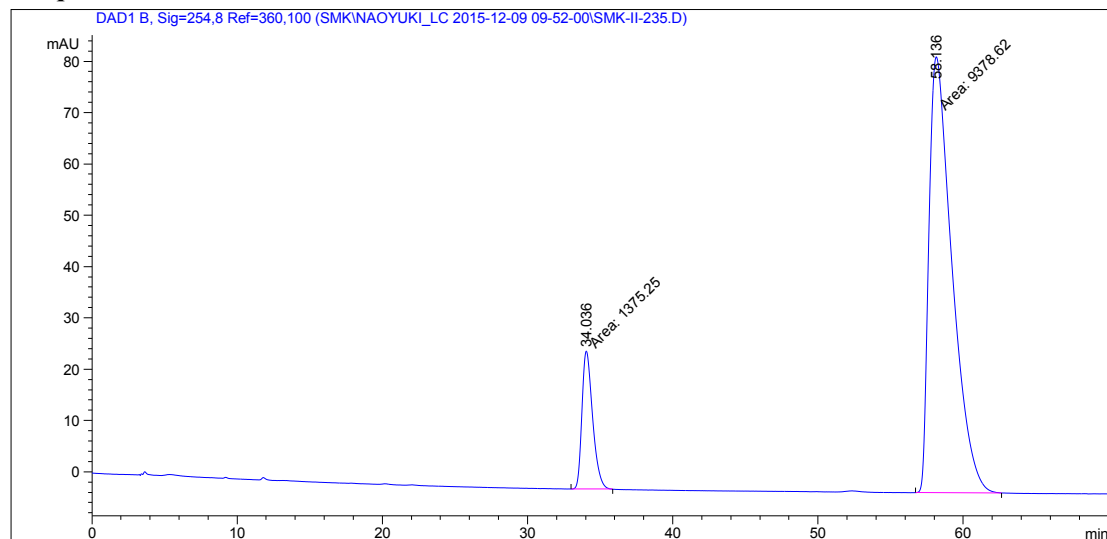

| Peak # | RetTime [min] | Type | Width [min] | Area [mAU*s] | Height [mAU] | Area %  |
|--------|---------------|------|-------------|--------------|--------------|---------|
| 1      | 34.036        | MM T | 0.8524      | 1375.24902   | 26.88844     | 12.7884 |
| 2      | 58.136        | MM T | 1.8396      | 9378.61816   | 84.97053     | 87.2116 |

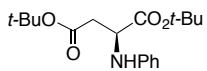

6r

HPLC analysis (OJ-H, 10% IPA–hexanes, 1.0 mL/min, 254 nm) indicated 80% ee: tR (minor) = 4.7 min, tR (major) = 6.0 min.

**DL-6r**

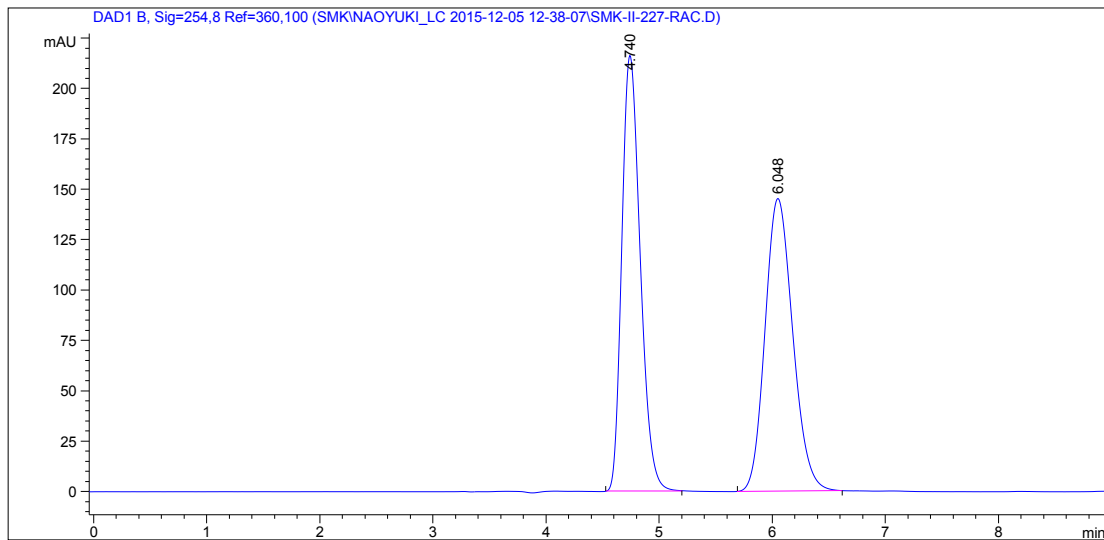

| Peak # | RetTime [min] | Type | Width [min] | Area [mAU*s] | Height [mAU] | Area %  |
|--------|---------------|------|-------------|--------------|--------------|---------|
| 1      | 4.740         | BB   | 0.1762      | 2451.02417   | 216.31883    | 49.7712 |
| 2      | 6.048         | BB   | 0.2647      | 2473.56104   | 145.26938    | 50.2288 |

**L-6r: 80% ee**

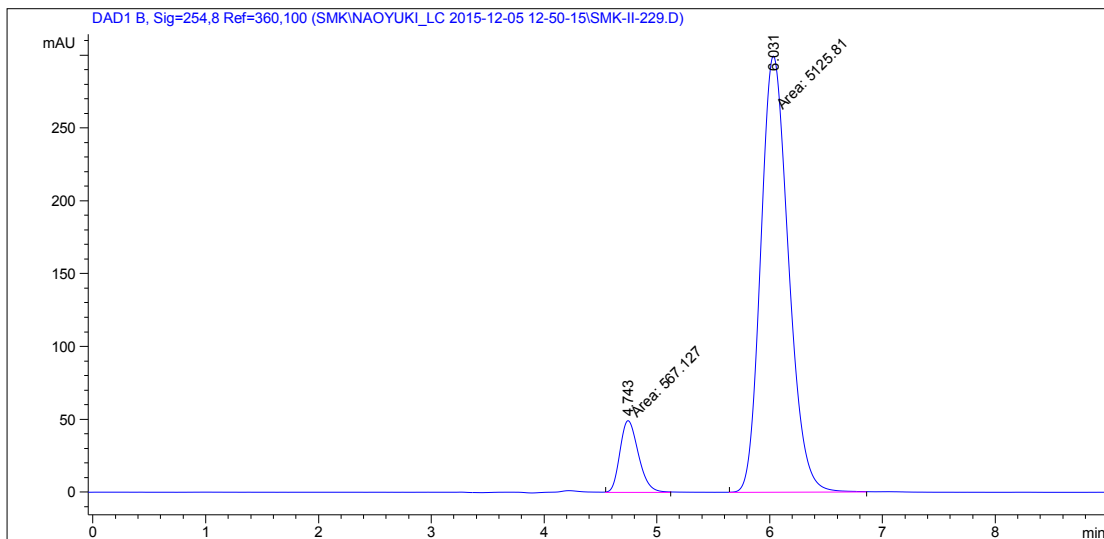

| Peak # | RetTime [min] | Type | Width [min] | Area [mAU*s] | Height [mAU] | Area %  |
|--------|---------------|------|-------------|--------------|--------------|---------|
| 1      | 4.743         | MM T | 0.1911      | 567.12701    | 49.45195     | 9.9619  |
| 2      | 6.031         | MM T | 0.2850      | 5125.80957   | 299.72882    | 90.0381 |



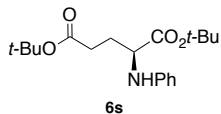

HPLC analysis (OJ-H, 5% IPA–hexanes, 0.8 mL/min, 254 nm) indicated 97% ee: tR (minor) = 6.4 min, tR (major) = 7.8 min.

### DL-6s

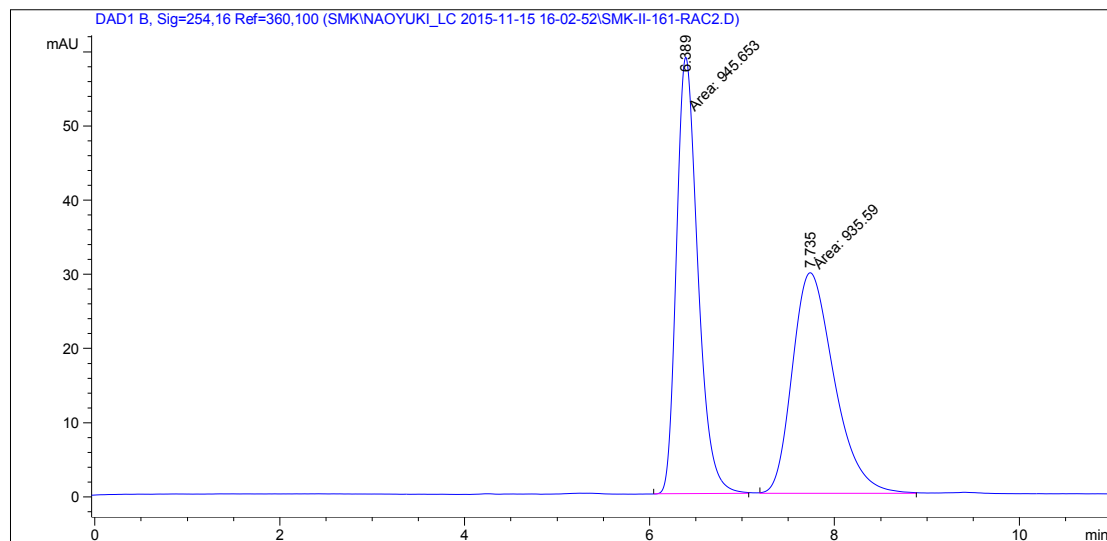

| Peak # | RetTime [min] | Type | Width [min] | Area [mAU*s] | Height [mAU] | Area %  |
|--------|---------------|------|-------------|--------------|--------------|---------|
| 1      | 6.389         | MM T | 0.2678      | 945.65277    | 58.85315     | 50.2674 |
| 2      | 7.735         | MM T | 0.5243      | 935.59015    | 29.74061     | 49.7326 |

### L-6s: 97% ee

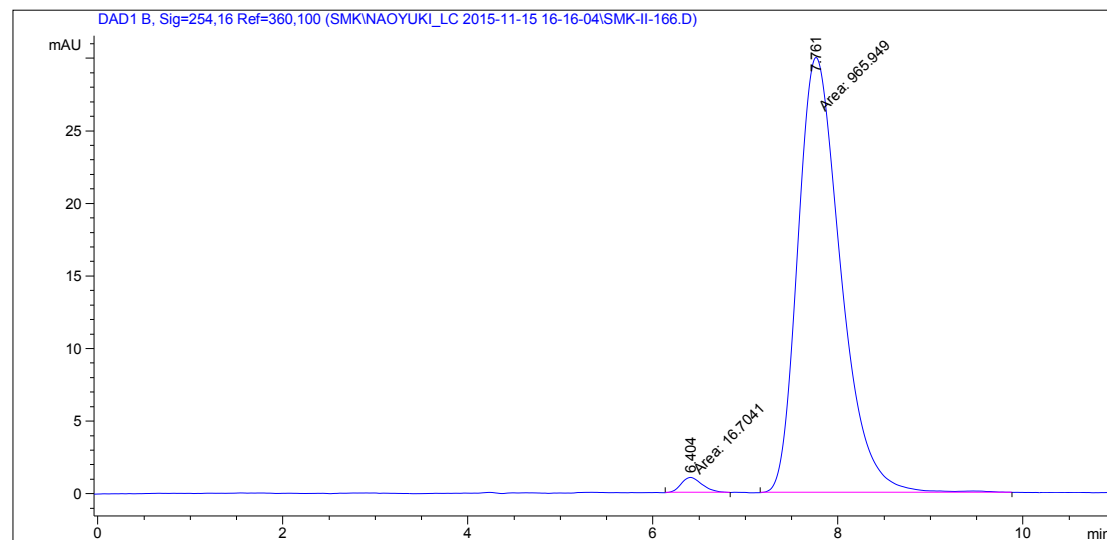

| Peak # | RetTime [min] | Type | Width [min] | Area [mAU*s] | Height [mAU] | Area %  |
|--------|---------------|------|-------------|--------------|--------------|---------|
| 1      | 6.404         | MM T | 0.2662      | 16.70407     | 1.04569      | 1.6999  |
| 2      | 7.761         | MM T | 0.5371      | 965.94861    | 29.97613     | 98.3001 |

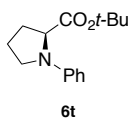

HPLC analysis (OJ-H, 5% IPA–hexanes, 0.8 mL/min, 254 nm) indicated 44% ee: tR (minor) = 7.0 min, tR (major) = 10.3 min.

**DL-6t**

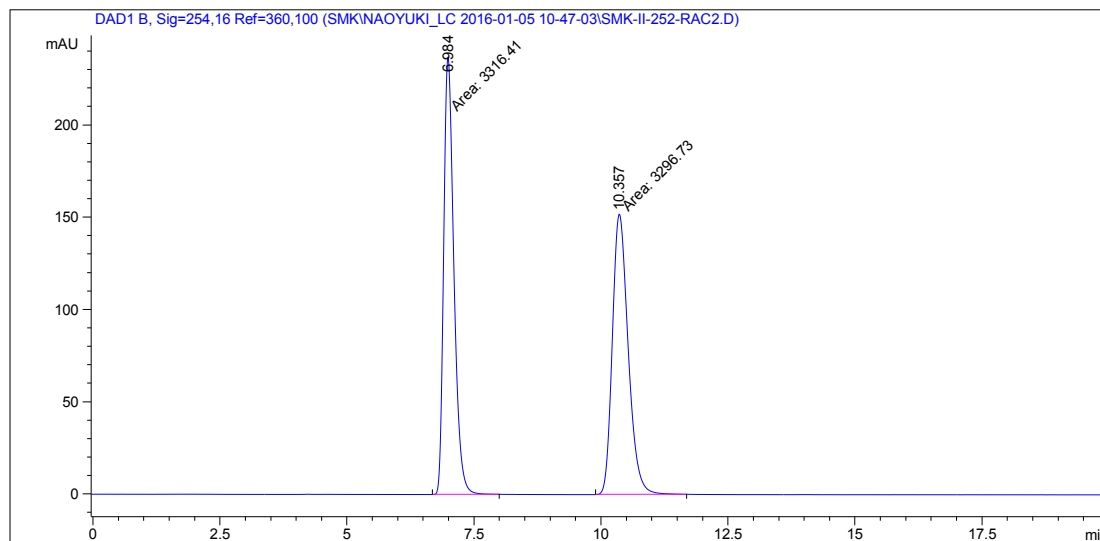

| Peak # | RetTime [min] | Type | Width [min] | Area [mAU*s] | Height [mAU] | Area %  |
|--------|---------------|------|-------------|--------------|--------------|---------|
| 1      | 6.984         | MM T | 0.2330      | 3316.41333   | 237.21582    | 50.1488 |
| 2      | 10.357        | MM T | 0.3614      | 3296.72925   | 152.01476    | 49.8512 |

**L-6t: 44% ee**

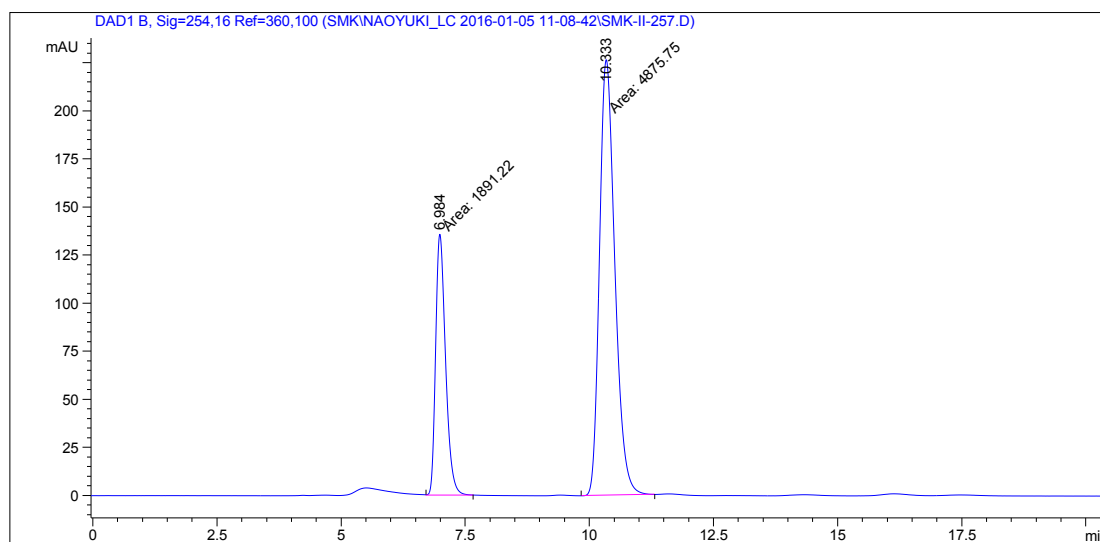

| Peak # | RetTime [min] | Type | Width [min] | Area [mAU*s] | Height [mAU] | Area %  |
|--------|---------------|------|-------------|--------------|--------------|---------|
| 1      | 6.984         | MM T | 0.2321      | 1891.22009   | 135.79919    | 27.9478 |
| 2      | 10.333        | MM T | 0.4395      | 4875.75342   | 226.49168    | 72.0522 |

L-6t: 97% ee

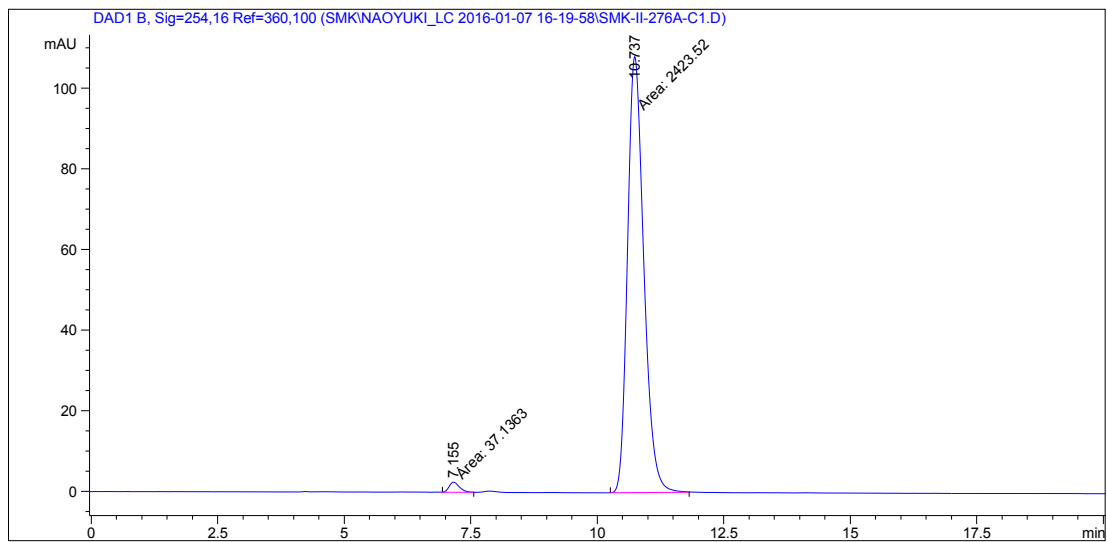

| Peak # | RetTime [min] | Type | Width [min] | Area [mAU*s] | Height [mAU] | Area %  |
|--------|---------------|------|-------------|--------------|--------------|---------|
| 1      | 7.155         | MM T | 0.2426      | 37.13628     | 2.55177      | 1.5092  |
| 2      | 10.737        | MM T | 0.3735      | 2423.52246   | 108.15245    | 98.4908 |

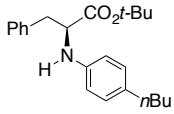

8a

HPLC analysis (OJ-H, 5% IPA–hexanes, 0.8 mL/min, 254 nm) indicated 90% ee: tR (minor) = 8.4 min, tR (major) = 10.6 min.

### DL-8a

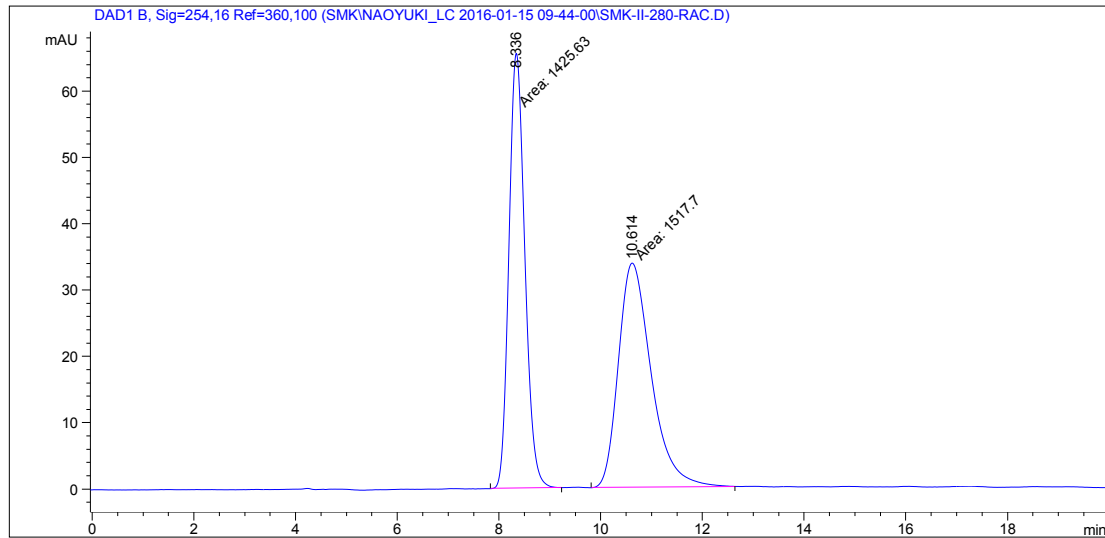

| Peak # | RetTime [min] | Type | Width [min] | Area [mAU*s] | Height [mAU] | Area %  |
|--------|---------------|------|-------------|--------------|--------------|---------|
| 1      | 8.336         | MM T | 0.3623      | 1425.62817   | 65.58488     | 48.4360 |
| 2      | 10.614        | MM T | 0.7479      | 1517.69531   | 33.81954     | 51.5640 |

### L-8a: 90% ee

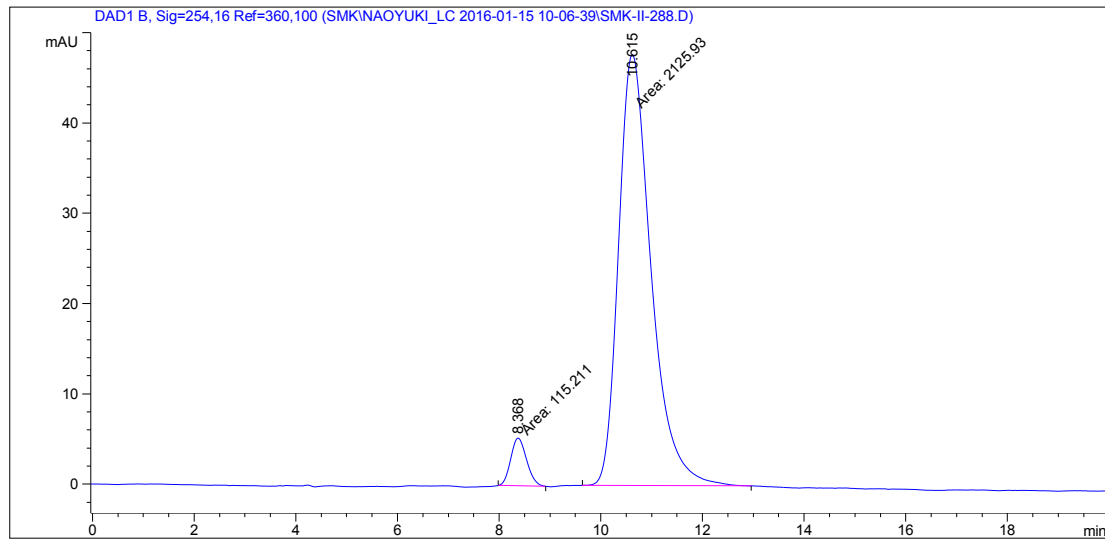

| Peak # | RetTime [min] | Type | Width [min] | Area [mAU*s] | Height [mAU] | Area %  |
|--------|---------------|------|-------------|--------------|--------------|---------|
| 1      | 8.368         | MM T | 0.3632      | 115.21096    | 5.28719      | 5.1407  |
| 2      | 10.615        | MM T | 0.7421      | 2125.93457   | 47.74479     | 94.8593 |

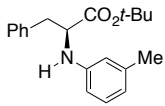

8b

HPLC analysis (OJ-H, 2% IPA–hexanes, 0.8 mL/min, 254 nm) indicated 87% ee: tR (minor) = 16.1 min, tR (major) = 20.3 min.

### DL-8b

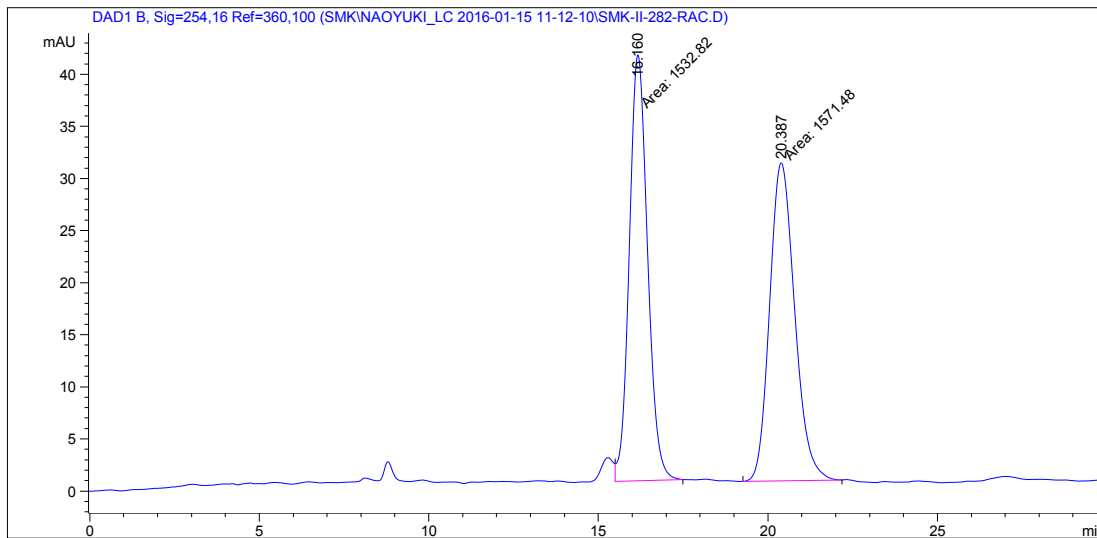

| Peak # | RetTime [min] | Type | Width [min] | Area [mAU*s] | Height [mAU] | Area %  |
|--------|---------------|------|-------------|--------------|--------------|---------|
| 1      | 16.160        | FM T | 0.6248      | 1532.82227   | 40.88693     | 49.3773 |
| 2      | 20.387        | MM T | 0.8578      | 1571.48206   | 30.53393     | 50.6227 |

### L-8b: 87% ee

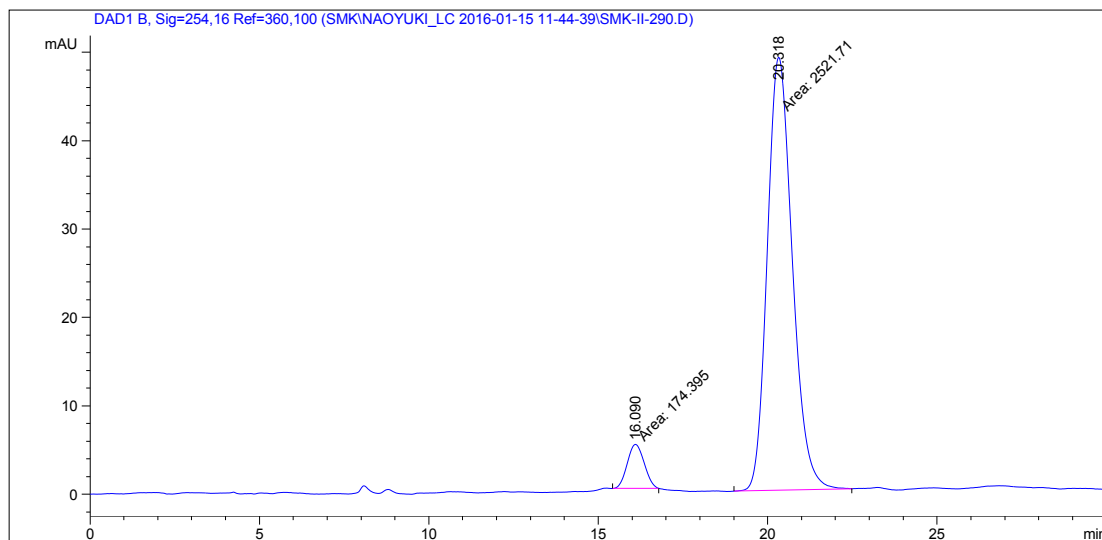

| Peak # | RetTime [min] | Type | Width [min] | Area [mAU*s] | Height [mAU] | Area %  |
|--------|---------------|------|-------------|--------------|--------------|---------|
| 1      | 16.090        | MM T | 0.5819      | 174.39456    | 4.99514      | 6.4684  |
| 2      | 20.318        | MM T | 0.8576      | 2521.71191   | 49.00652     | 93.5316 |

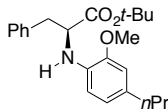

8c

HPLC analysis (OJ-H, 2% IPA–hexanes, 0.8 mL/min, 254 nm) indicated 88% ee: tR (minor) = 8.9 min, tR (major) = 10.8 min.

### DL-8c

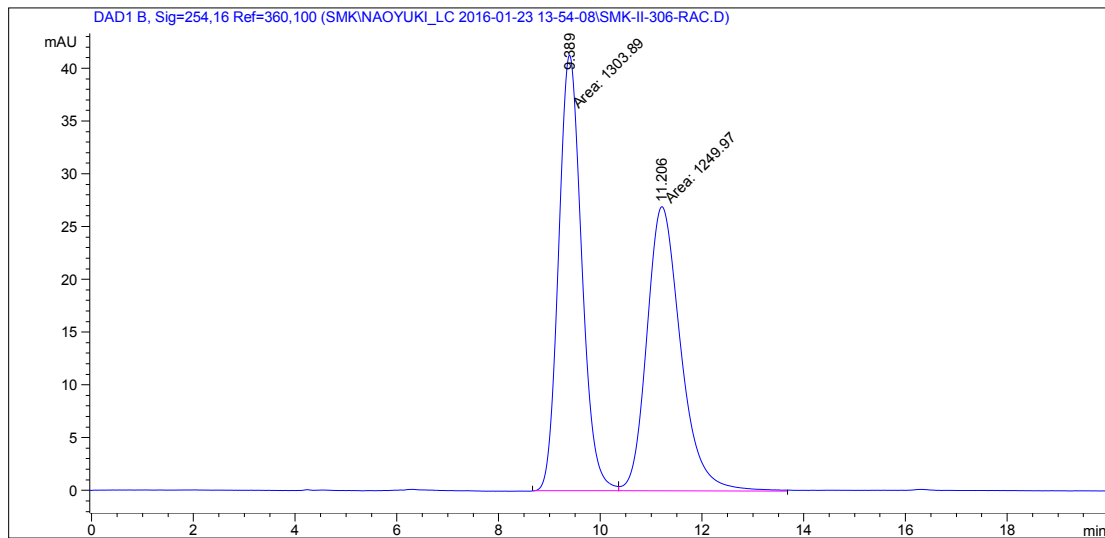

| Peak # | RetTime [min] | Type | Width [min] | Area [mAU*s] | Height [mAU] | Area %  |
|--------|---------------|------|-------------|--------------|--------------|---------|
| 1      | 9.389         | MF T | 0.5263      | 1303.88879   | 41.29055     | 51.0556 |
| 2      | 11.206        | FM T | 0.7730      | 1249.97083   | 26.95138     | 48.9444 |

### L-8c: 88% ee

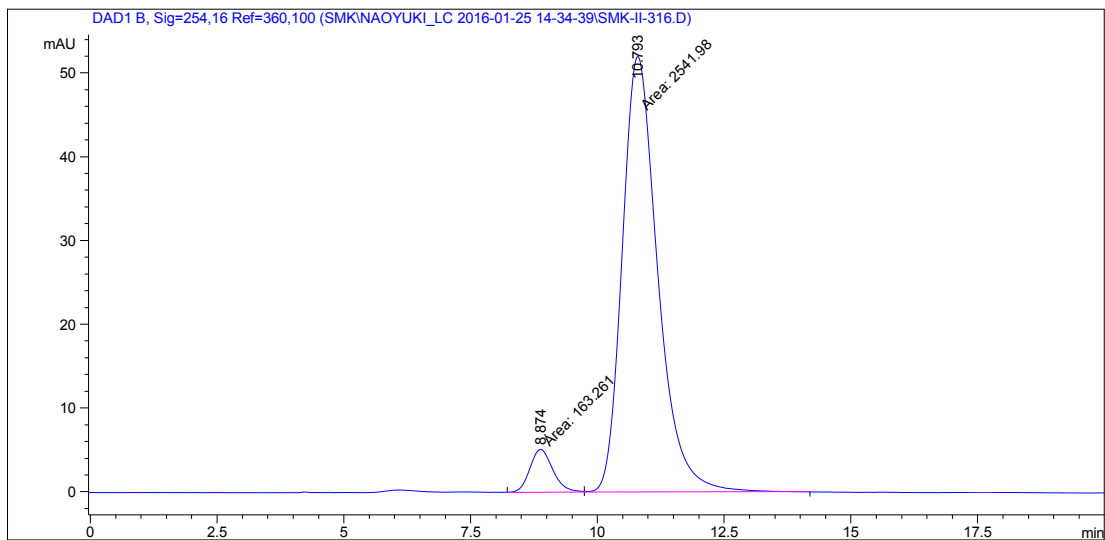

| Peak # | RetTime [min] | Type | Width [min] | Area [mAU*s] | Height [mAU] | Area %  |
|--------|---------------|------|-------------|--------------|--------------|---------|
| 1      | 8.874         | MF T | 0.5294      | 163.26129    | 5.13948      | 6.0350  |
| 2      | 10.793        | FM T | 0.8144      | 2541.97607   | 52.01950     | 93.9650 |

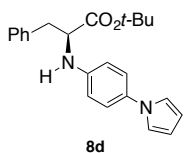

HPLC analysis (OJ-H, 10% IPA–hexanes, 1.0 mL/min, 254 nm) indicated 91% ee: tR (major) = 38.3 min, tR (minor) = 50.5 min.

### DL-8d

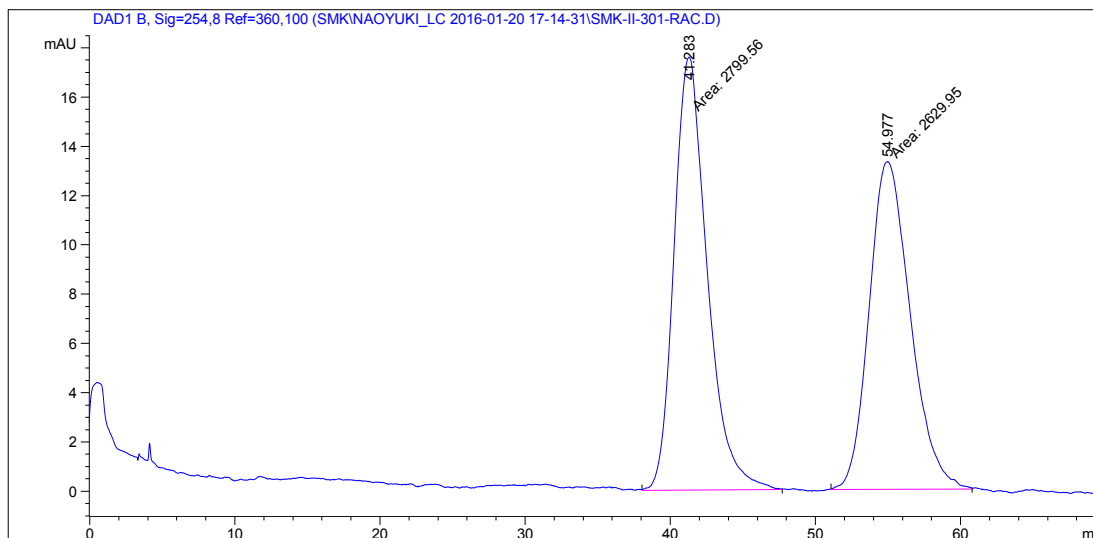

| Peak # | RetTime [min] | Type | Width [min] | Area [mAU*s] | Height [mAU] | Area %  |
|--------|---------------|------|-------------|--------------|--------------|---------|
| 1      | 41.283        | MM T | 2.6534      | 2799.55811   | 17.58467     | 51.5619 |
| 2      | 54.977        | MM T | 3.2915      | 2629.95483   | 13.31691     | 48.4381 |

### L-8d: 91% ee

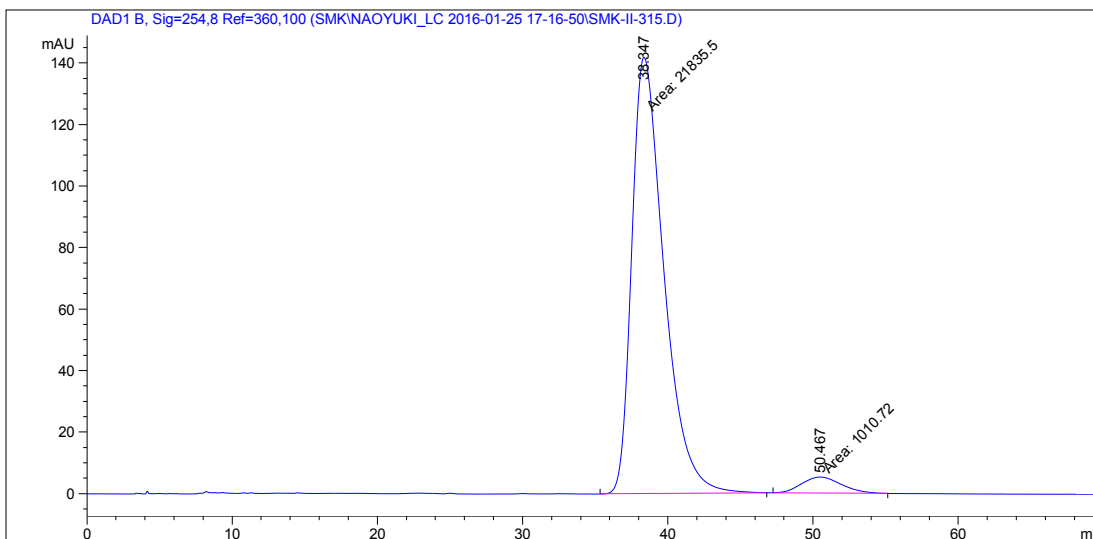

| Peak # | RetTime [min] | Type | Width [min] | Area [mAU*s] | Height [mAU] | Area %  |
|--------|---------------|------|-------------|--------------|--------------|---------|
| 1      | 38.347        | MM T | 2.5646      | 2.18355e4    | 141.90234    | 95.5760 |
| 2      | 50.467        | MM T | 3.2115      | 1010.72095   | 5.24537      | 4.4240  |

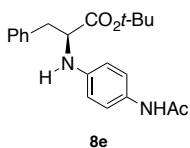

HPLC analysis (AD-H, 10% IPA–hexanes, 1.0 mL/min, 254 nm) indicated 86% ee: tR (minor) = 17.4 min, tR (major) = 23.7 min.

### DL-8e

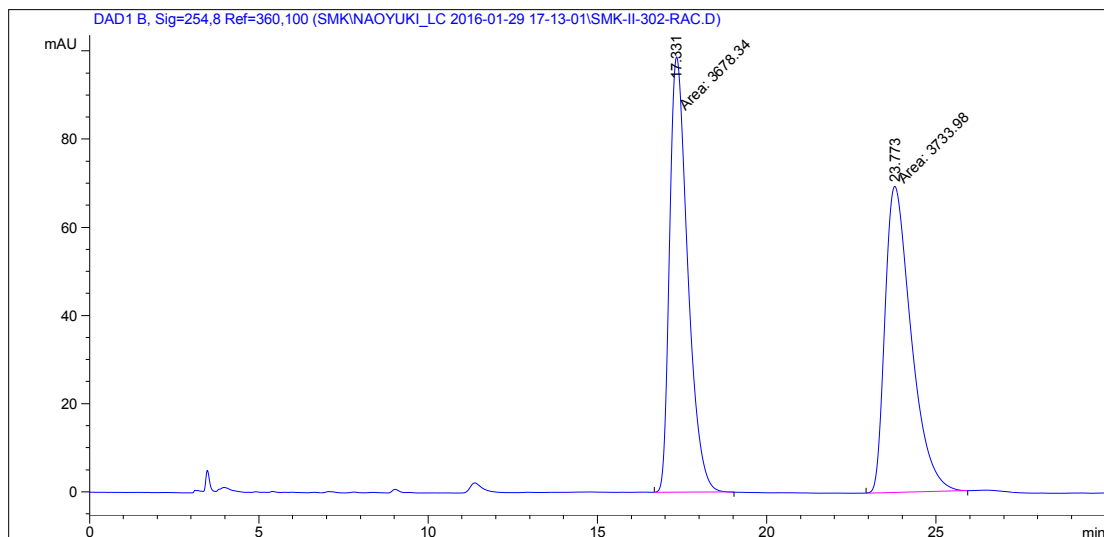

| Peak # | RetTime [min] | Type | Width [min] | Area [mAU*s] | Height [mAU] | Area %  |
|--------|---------------|------|-------------|--------------|--------------|---------|
| 1      | 17.331        | MM T | 0.6205      | 3678.34009   | 98.80273     | 49.6247 |
| 2      | 23.773        | MM T | 0.8958      | 3733.97754   | 69.47446     | 50.3753 |

### L-8e: 86% ee

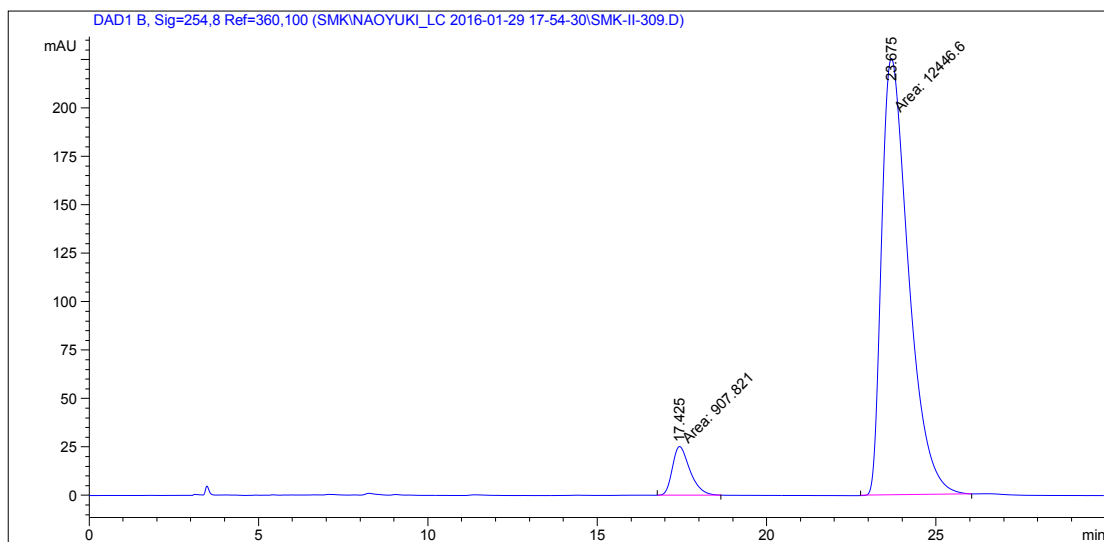

| Peak # | RetTime [min] | Type | Width [min] | Area [mAU*s] | Height [mAU] | Area %  |
|--------|---------------|------|-------------|--------------|--------------|---------|
| 1      | 17.425        | MM T | 0.6017      | 907.82111    | 25.14801     | 6.7979  |
| 2      | 23.675        | MM T | 0.9202      | 1.24466e4    | 225.43025    | 93.2021 |



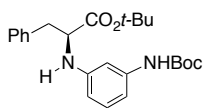

8f

HPLC analysis (AD-H, 10% IPA–hexanes, 0.8 mL/min, 254 nm) indicated 80% ee: tR (major) = 12.8 min, tR (minor) = 15.0 min.

### DL-8f

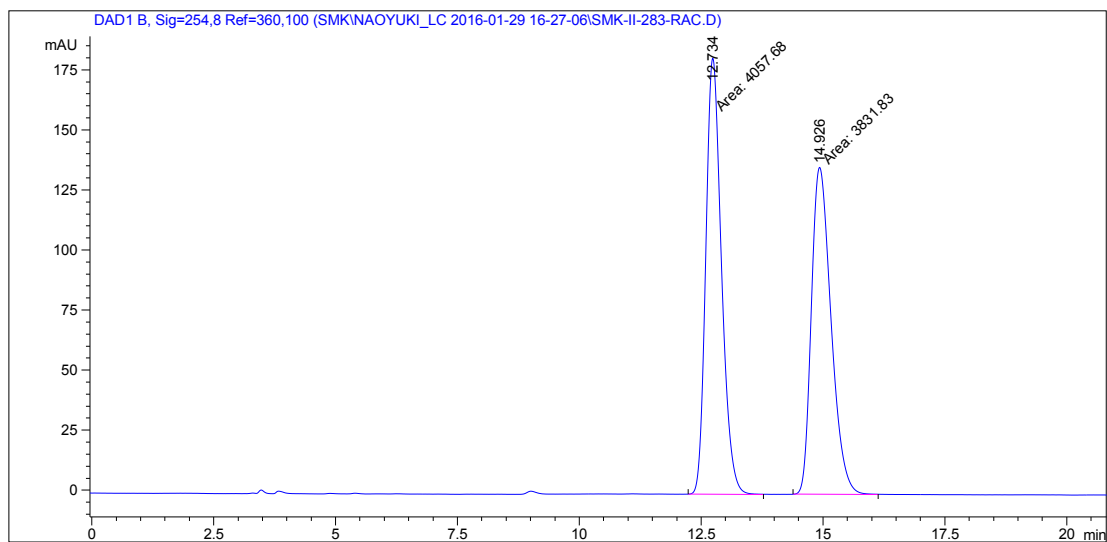

| Peak # | RetTime [min] | Type | Width [min] | Area [mAU*s] | Height [mAU] | Area %  |
|--------|---------------|------|-------------|--------------|--------------|---------|
| 1      | 12.734        | MM T | 0.3722      | 4057.68433   | 181.69006    | 51.4314 |
| 2      | 14.926        | MM T | 0.4689      | 3831.82544   | 136.19818    | 48.5686 |

### L-8f: 80% ee

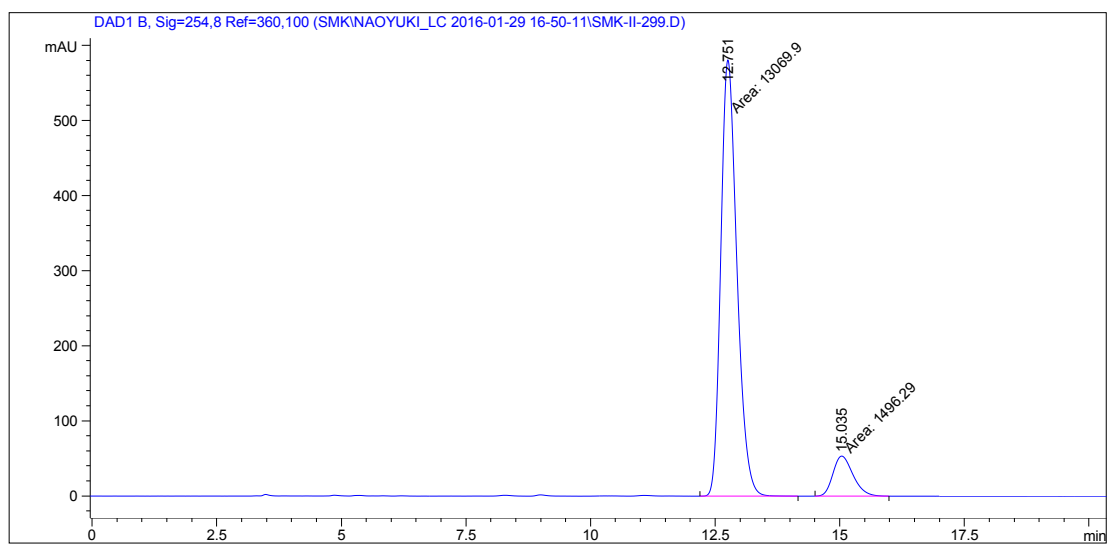

| Peak # | RetTime [min] | Type | Width [min] | Area [mAU*s] | Height [mAU] | Area %  |
|--------|---------------|------|-------------|--------------|--------------|---------|
| 1      | 12.751        | MM T | 0.3749      | 1.30699e4    | 580.98706    | 89.7276 |
| 2      | 15.035        | MM T | 0.4674      | 1496.29407   | 53.35979     | 10.2724 |

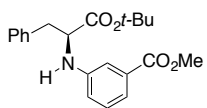

8g

HPLC analysis (OJ-H, 10% IPA–hexanes, 1.0 mL/min, 254 nm) indicated 82% ee: tR (major) = 11.9 min, tR (minor) = 18.8 min.

### DL-8g

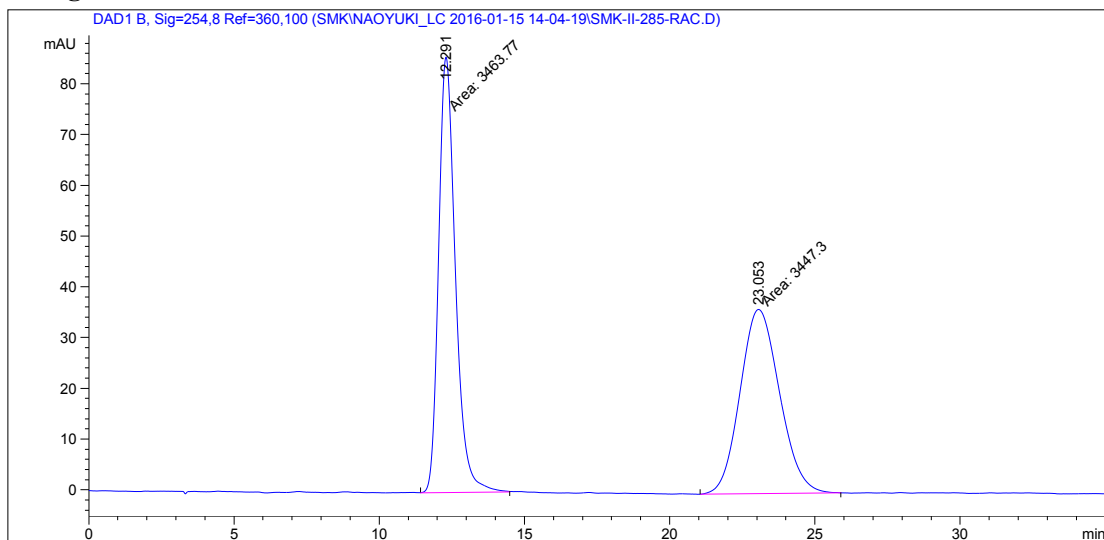

| Peak # | RetTime [min] | Type | Width [min] | Area [mAU*s] | Height [mAU] | Area %  |
|--------|---------------|------|-------------|--------------|--------------|---------|
| 1      | 12.291        | MM T | 0.6723      | 3463.77002   | 85.86269     | 50.1192 |
| 2      | 23.053        | MM T | 1.5800      | 3447.29565   | 36.36466     | 49.8808 |

### L-8g: 82% ee

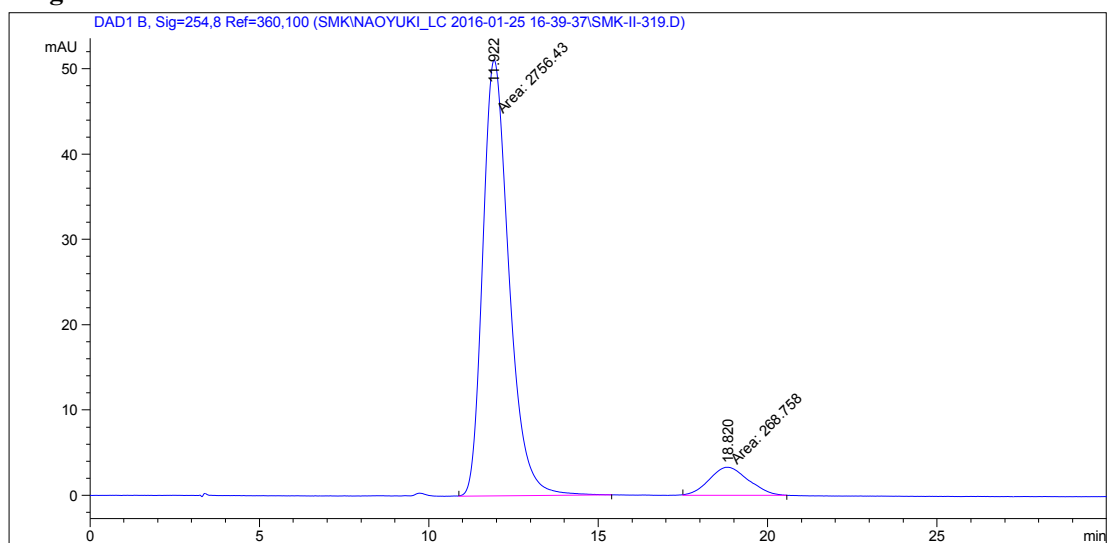

| Peak # | RetTime [min] | Type | Width [min] | Area [mAU*s] | Height [mAU] | Area %  |
|--------|---------------|------|-------------|--------------|--------------|---------|
| 1      | 11.922        | MM T | 0.8989      | 2756.42700   | 51.10752     | 91.1160 |
| 2      | 18.820        | MM T | 1.3519      | 268.75815    | 3.31338      | 8.8840  |

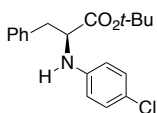

8h

HPLC analysis (OJ-H, 5% IPA–hexanes, 0.8 mL/min, 254 nm) indicated 91% ee: tR (minor) = 15.7 min, tR (major) = 19.8 min.

### DL-8h

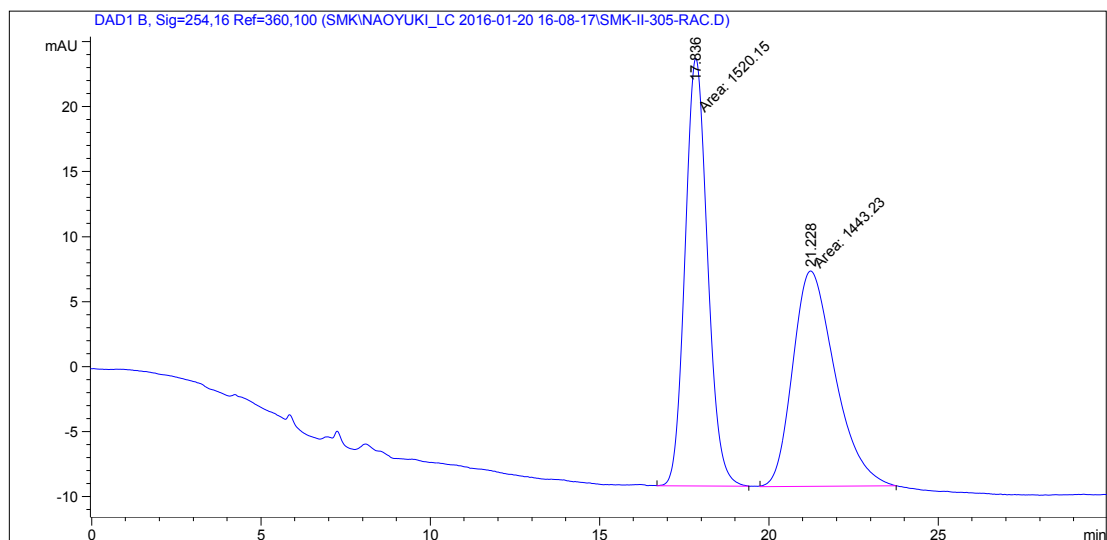

| Peak # | RetTime [min] | Type | Width [min] | Area [mAU*s] | Height [mAU] | Area %  |
|--------|---------------|------|-------------|--------------|--------------|---------|
| 1      | 17.836        | MM T | 0.7699      | 1520.15405   | 32.90823     | 51.2979 |
| 2      | 21.228        | MM T | 1.4503      | 1443.23242   | 16.58567     | 48.7021 |

### L-8h: 91% ee

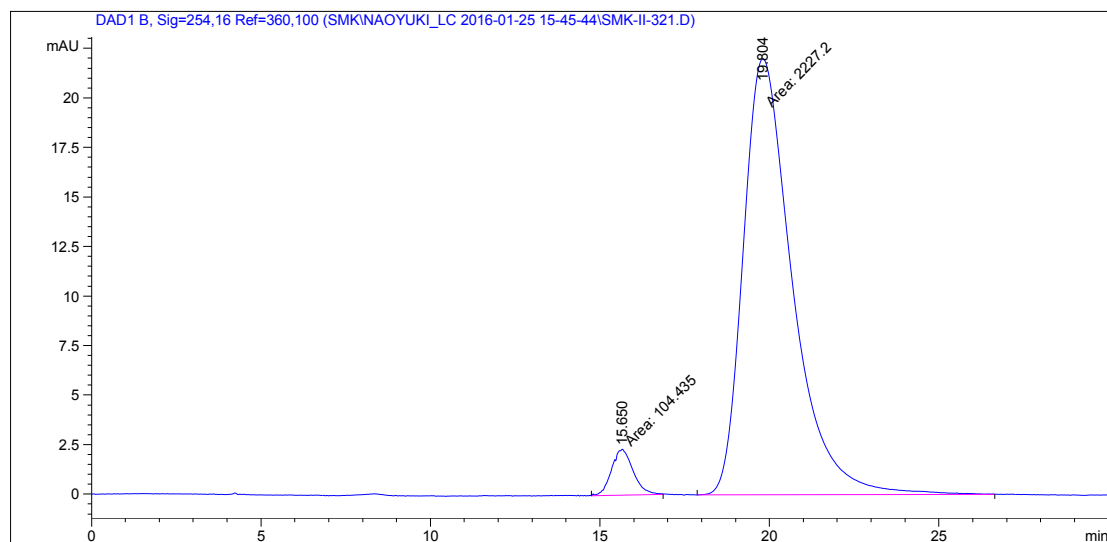

| Peak # | RetTime [min] | Type | Width [min] | Area [mAU*s] | Height [mAU] | Area %  |
|--------|---------------|------|-------------|--------------|--------------|---------|
| 1      | 15.650        | MM T | 0.7462      | 104.43485    | 2.33263      | 4.4790  |
| 2      | 19.804        | MM T | 1.6858      | 2227.20020   | 22.01986     | 95.5210 |

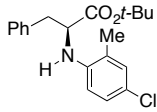

8i

HPLC analysis (OJ-H, 2% IPA–hexanes, 0.8 mL/min, 254 nm) indicated 88% ee: tR (minor) = 11.9 min, tR (major) = 18.0 min.

### DL-8i

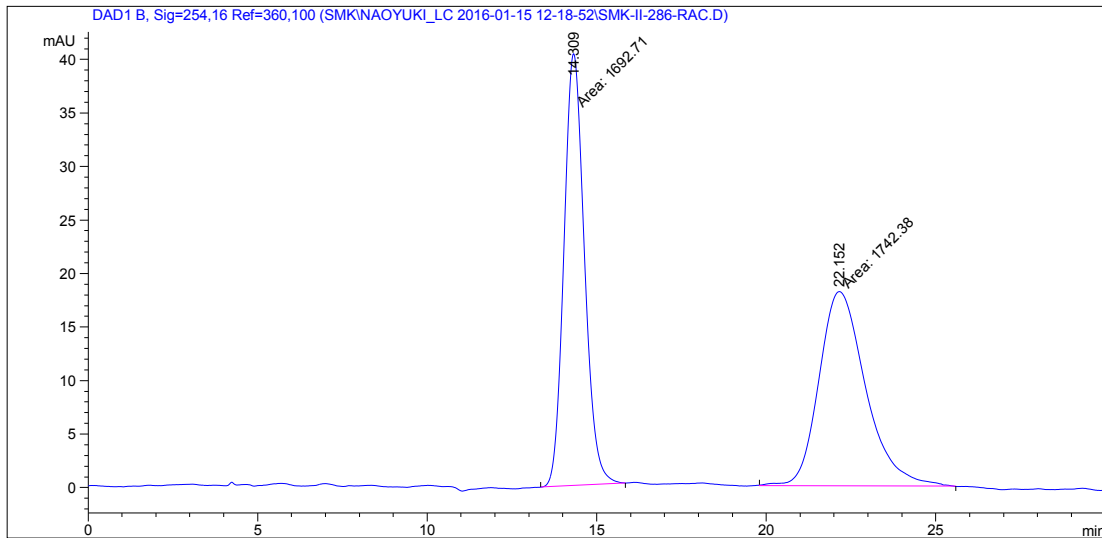

| Peak # | RetTime [min] | Type | Width [min] | Area [mAU*s] | Height [mAU] | Area %  |
|--------|---------------|------|-------------|--------------|--------------|---------|
| 1      | 14.309        | MM T | 0.6993      | 1692.70593   | 40.34129     | 49.2769 |
| 2      | 22.152        | MM T | 1.5991      | 1742.38257   | 18.16058     | 50.7231 |

### L-8i: 88%

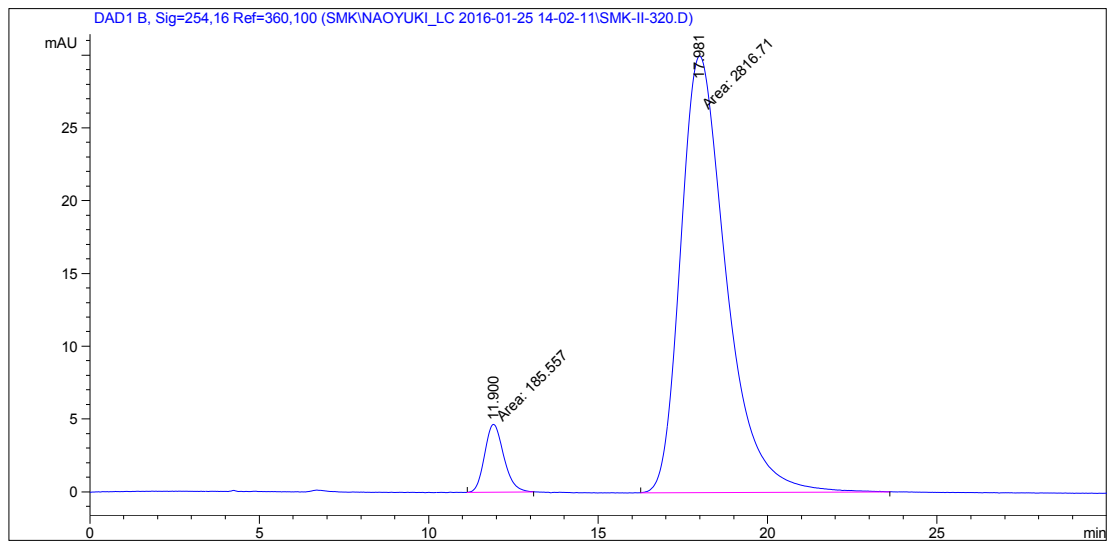

| Peak # | RetTime [min] | Type | Width [min] | Area [mAU*s] | Height [mAU] | Area %  |
|--------|---------------|------|-------------|--------------|--------------|---------|
| 1      | 11.900        | MM T | 0.6610      | 185.55652    | 4.67876      | 6.1805  |
| 2      | 17.981        | MM T | 1.5645      | 2816.71094   | 30.00627     | 93.8195 |

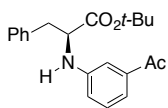

8j

HPLC analysis (AD-H, 10% IPA–hexanes, 1.0 mL/min, 254 nm) indicated 85% ee: tR (minor) = 13.9 min, tR (major) = 20.2 min.

### DL-8j

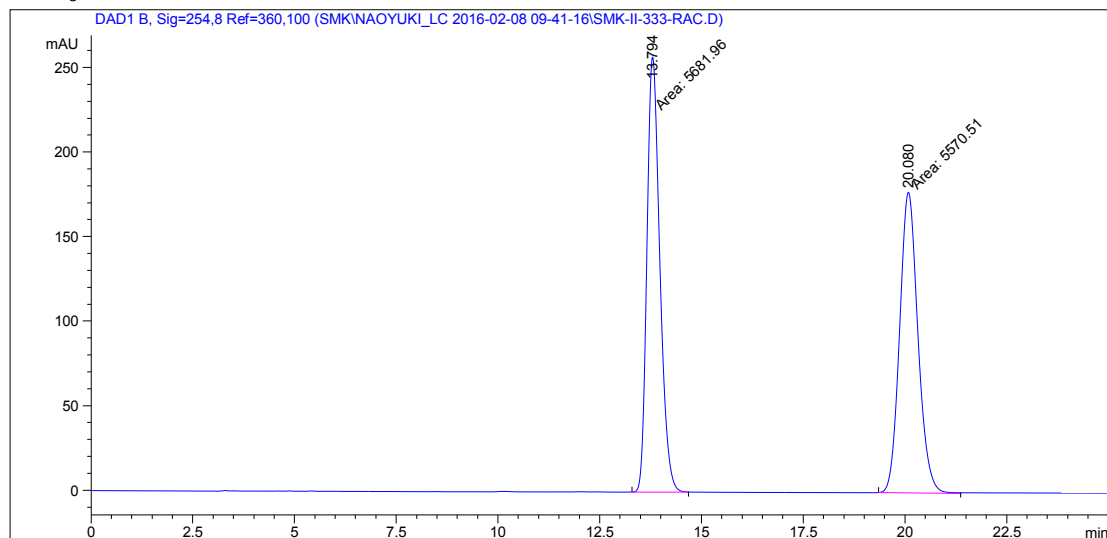

| Peak # | RetTime [min] | Type | Width [min] | Area [mAU*s] | Height [mAU] | Area %  |
|--------|---------------|------|-------------|--------------|--------------|---------|
| 1      | 13.794        | MM T | 0.3679      | 5681.96191   | 257.38715    | 50.4952 |
| 2      | 20.080        | MM T | 0.5218      | 5570.51074   | 177.92102    | 49.5048 |

### L-8j: 85% ee

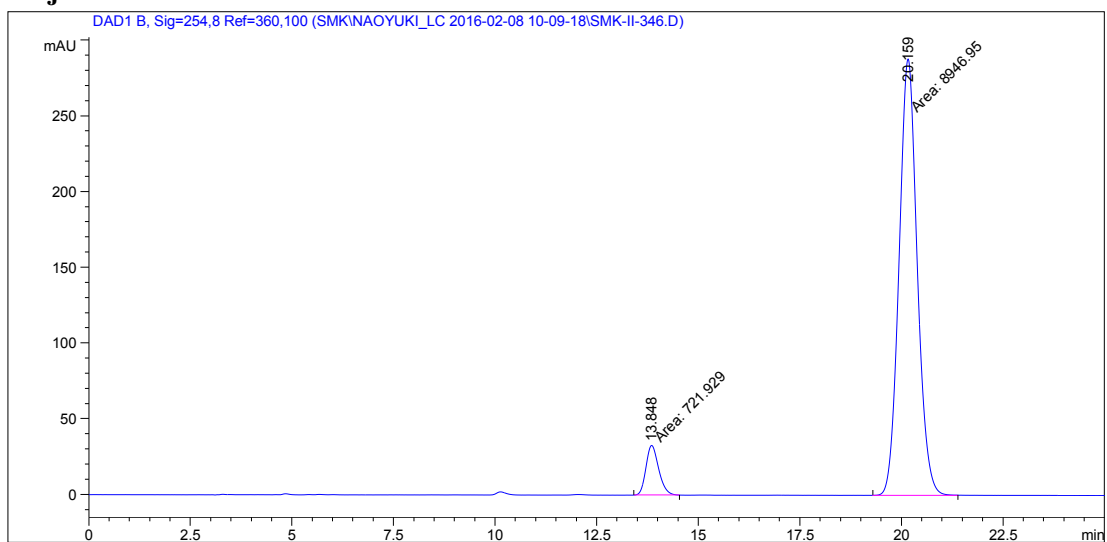

| Peak # | RetTime [min] | Type | Width [min] | Area [mAU*s] | Height [mAU] | Area %  |
|--------|---------------|------|-------------|--------------|--------------|---------|
| 1      | 13.848        | MM T | 0.3658      | 721.92902    | 32.89493     | 7.4665  |
| 2      | 20.159        | MM T | 0.5174      | 8946.94922   | 288.20944    | 92.5335 |

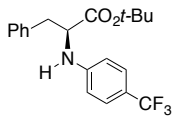

8k

HPLC analysis (OJ-H, 2% IPA–hexanes, 0.8 mL/min, 254 nm) indicated 55% ee: tR (minor) = 18.4 min, tR (major) = 24.4 min.

### DL-8k

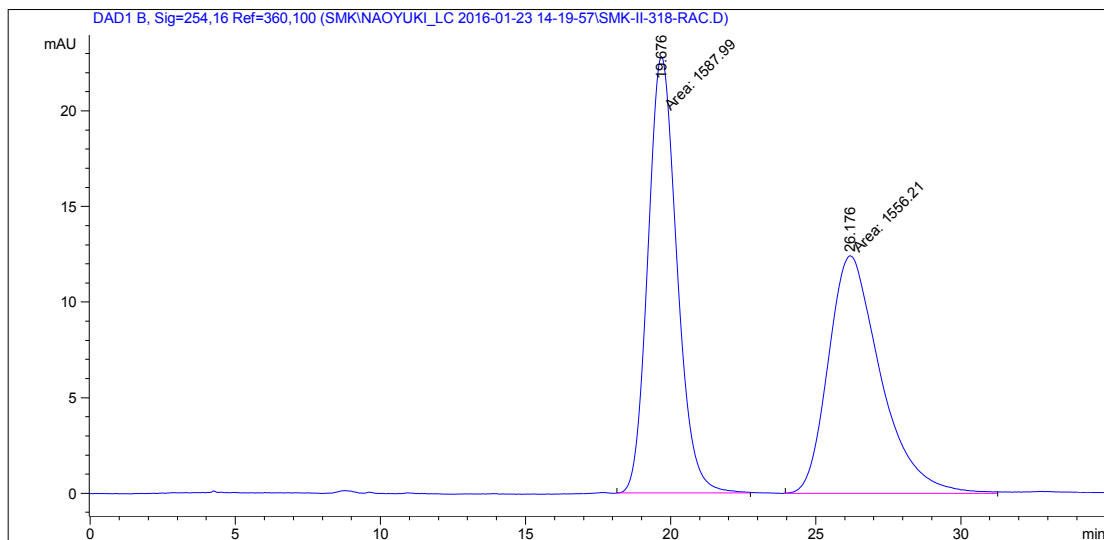

| Peak # | RetTime [min] | Type | Width [min] | Area [mAU*s] | Height [mAU] | Area %  |
|--------|---------------|------|-------------|--------------|--------------|---------|
| 1      | 19.676        | MM T | 1.1603      | 1587.98938   | 22.81080     | 50.5053 |
| 2      | 26.176        | MM T | 2.1387      | 1556.21118   | 12.43672     | 49.4947 |

### L-8k: 55% ee

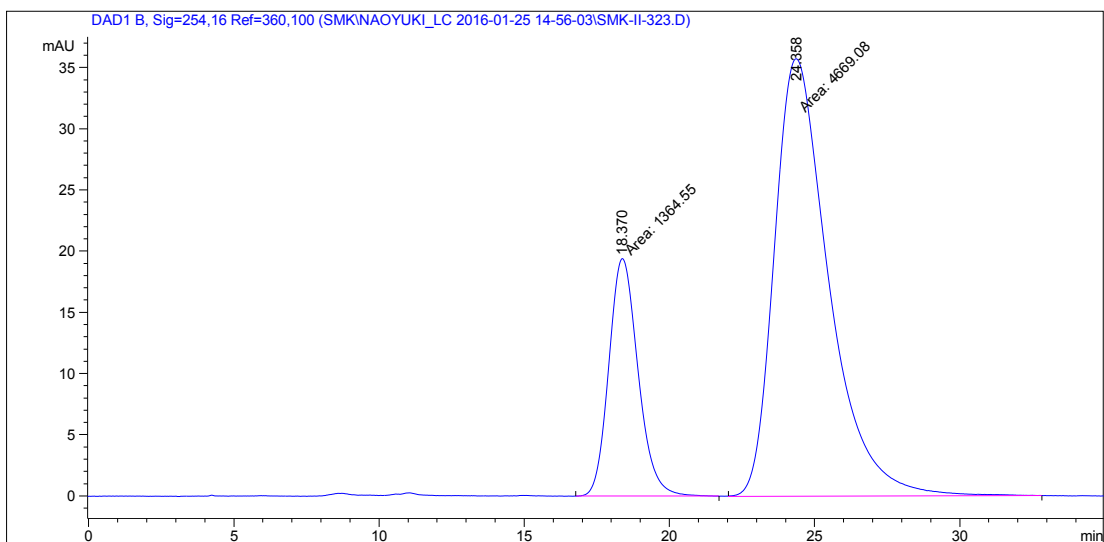

| Peak # | RetTime [min] | Type | Width [min] | Area [mAU*s] | Height [mAU] | Area %  |
|--------|---------------|------|-------------|--------------|--------------|---------|
| 1      | 18.370        | MM T | 1.1711      | 1364.54626   | 19.42023     | 22.6157 |
| 2      | 24.358        | MM T | 2.1762      | 4669.08252   | 35.75946     | 77.3843 |

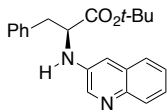

8I

HPLC analysis (AD-H, 10% IPA–hexanes, 1.0 mL/min, 254 nm) indicated 97% ee: tR (minor) = 12.3 min, tR (major) = 25.7 min.

### DL-8I

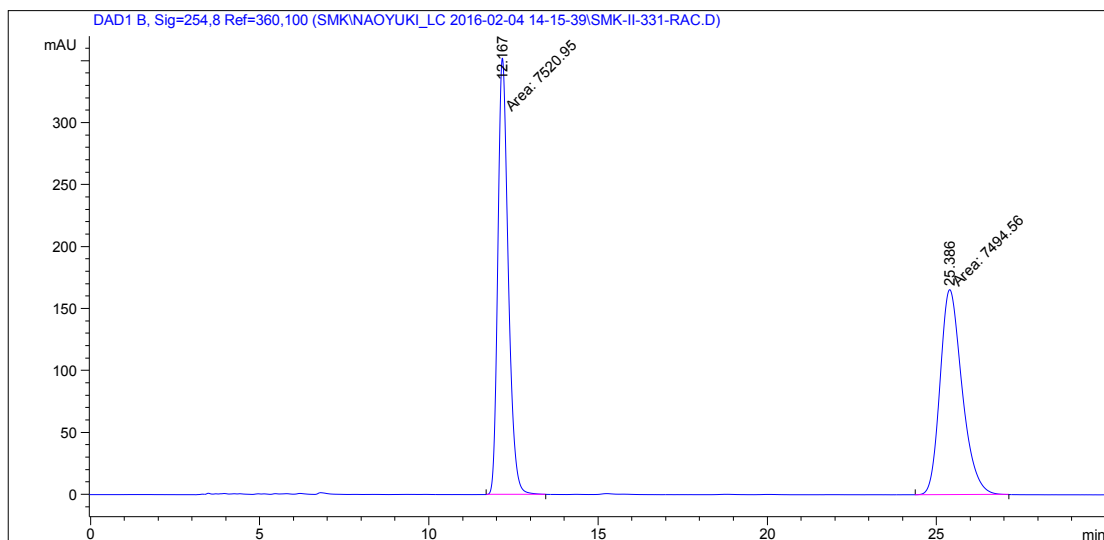

| Peak # | RetTime [min] | Type | Width [min] | Area [mAU*s] | Height [mAU] | Area %  |
|--------|---------------|------|-------------|--------------|--------------|---------|
| 1      | 12.167        | MM T | 0.3558      | 7520.95361   | 352.33743    | 50.0879 |
| 2      | 25.386        | MM T | 0.7545      | 7494.55811   | 165.54926    | 49.9121 |

### L-8I: 97% ee

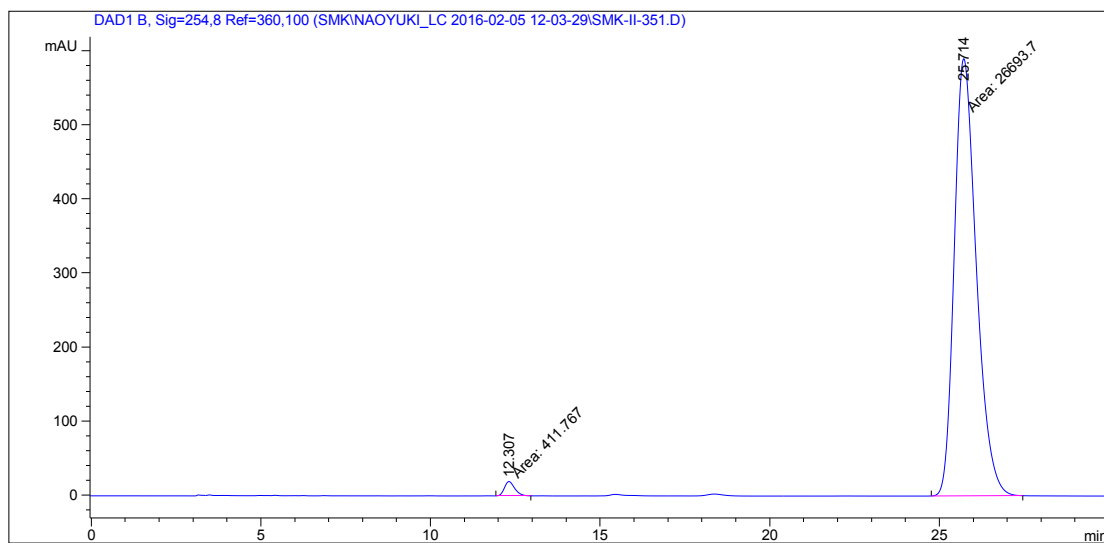

| Peak # | RetTime [min] | Type | Width [min] | Area [mAU*s] | Height [mAU] | Area %  |
|--------|---------------|------|-------------|--------------|--------------|---------|
| 1      | 12.307        | MM T | 0.3542      | 411.76654    | 19.37539     | 1.5191  |
| 2      | 25.714        | MM T | 0.7540      | 2.66937e4    | 590.05597    | 98.4809 |





### L-6a entry 2: 41% ee

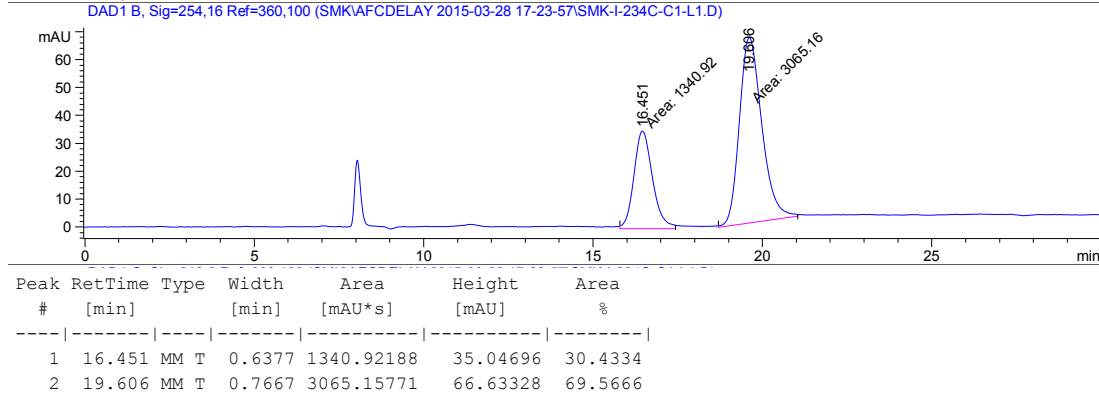

### L-6a entry 4: 0% ee

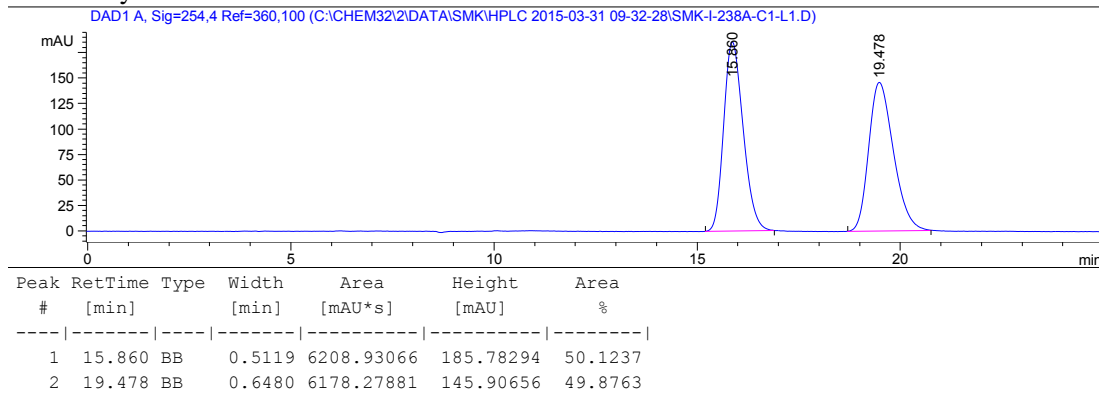

### L-6a entry 5: 72% ee

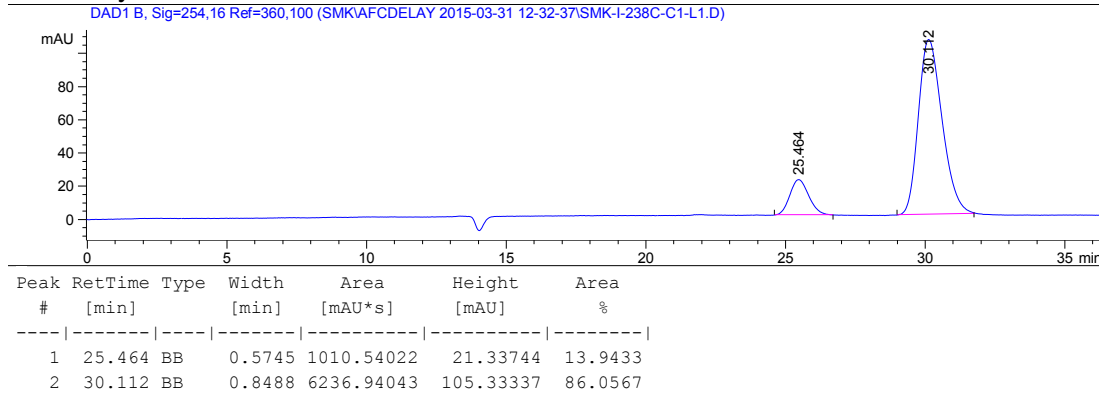

**L-6a entry 6: 73% ee**

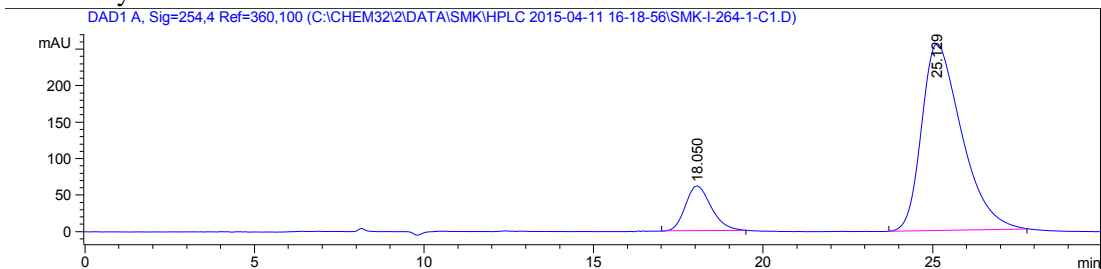

| Peak # | RetTime [min] | Type | Width [min] | Area [mAU*s] | Height [mAU] | Area %  |
|--------|---------------|------|-------------|--------------|--------------|---------|
| 1      | 18.050        | BB   | 0.6521      | 3300.34644   | 61.69863     | 13.5605 |
| 2      | 25.129        | BB   | 1.0209      | 2.10375e4    | 256.48758    | 86.4395 |

**L-6a entry 7: 78% ee**

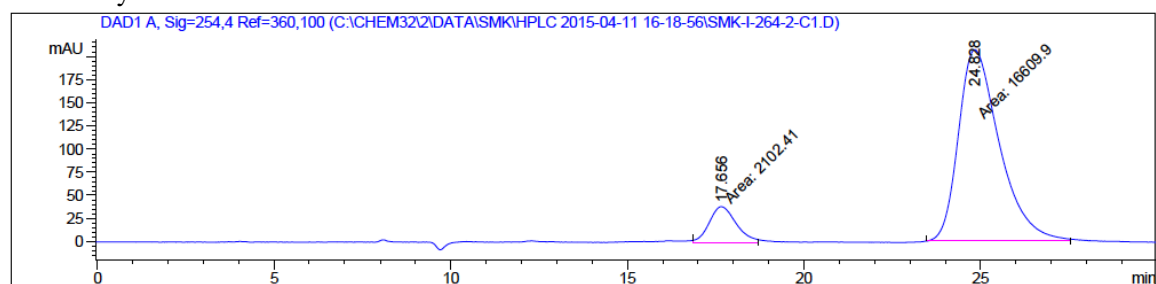

| Peak # | RetTime [min] | Type | Width [min] | Area [mAU*s] | Height [mAU] | Area %  |
|--------|---------------|------|-------------|--------------|--------------|---------|
| 1      | 17.656        | MM   | 0.8952      | 2102.41284   | 39.14093     | 11.2355 |
| 2      | 24.828        | MM   | 1.3405      | 1.66099e4    | 206.50815    | 88.7645 |

**L-6a entry 8: 84% ee**

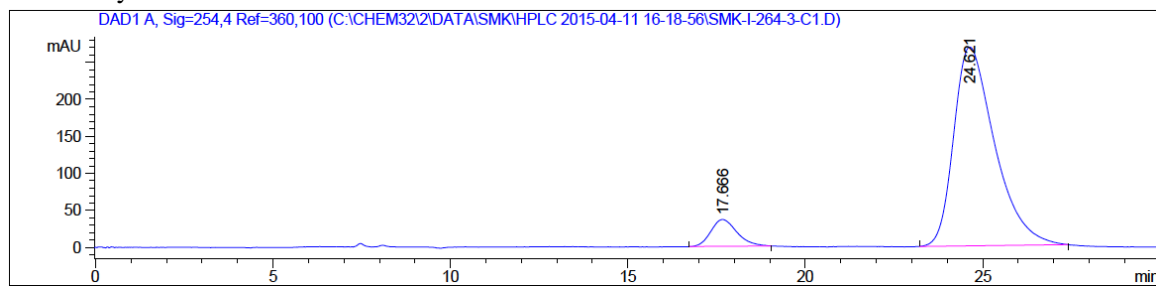

| Peak # | RetTime [min] | Type | Width [min] | Area [mAU*s] | Height [mAU] | Area %  |
|--------|---------------|------|-------------|--------------|--------------|---------|
| 1      | 17.666        | BB   | 0.6531      | 1867.96472   | 36.37347     | 7.9421  |
| 2      | 24.621        | BB   | 1.0675      | 2.16517e4    | 268.86987    | 92.0579 |

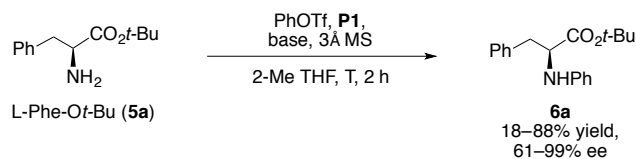

**Table S3.** Subset of reactions from subsequent DOE analysis.

| entry | T     | equiv base                      |         | 3 Å MS | yield | ee  | 2 mol% precatalyst |     | 5 mol% precatalyst |  |
|-------|-------|---------------------------------|---------|--------|-------|-----|--------------------|-----|--------------------|--|
|       |       | base                            | (to 5a) |        |       |     | yield              | ee  |                    |  |
| 1     | 50 °C | CS <sub>2</sub> CO <sub>3</sub> | 1       | 0 mg   | 64%   | 91% | 89%                | 94% |                    |  |
| 2     | 50 °C | CS <sub>2</sub> CO <sub>3</sub> | 1       | 50 mg  | 51%   | 95% | 80%                | 92% |                    |  |
| 3     | 50 °C | CS <sub>2</sub> CO <sub>3</sub> | 3       | 0 mg   | 69%   | 89% | 93%                | 91% |                    |  |
| 4     | 50 °C | CS <sub>2</sub> CO <sub>3</sub> | 3       | 50 mg  | 69%   | 92% | 95%                | 94% |                    |  |

Yellow indicates optimized reaction conditions.

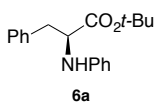

HPLC analysis conditions: OJ-H, 2% IPA–hexanes, 0.8 mL/min, 254 nm

### DL-6a

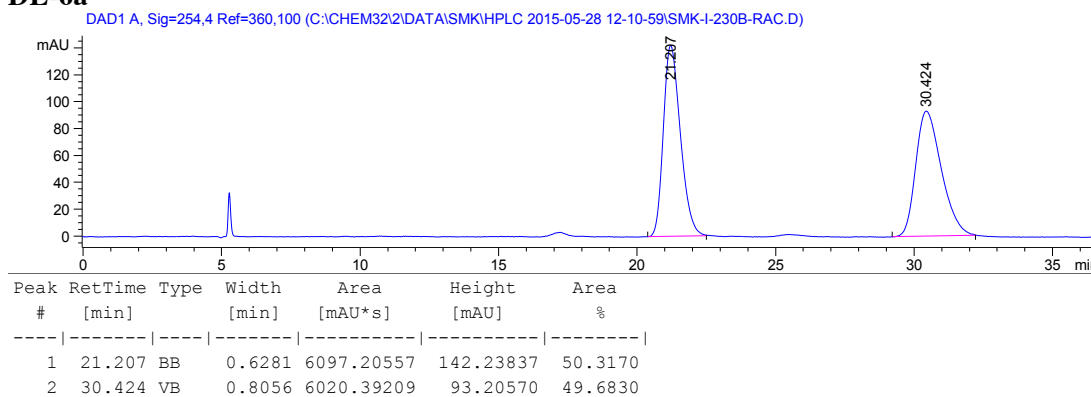

### L-6a entry 1, 2 mol% precatalyst: 91% ee

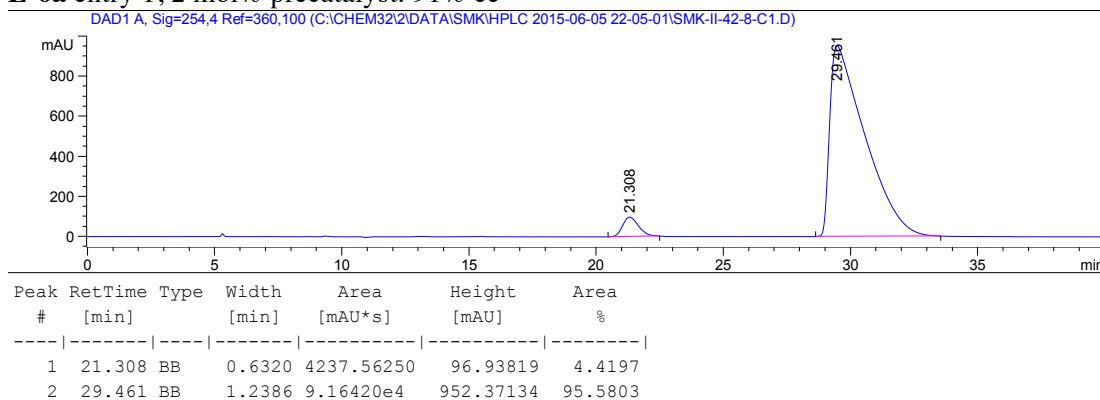

### L-6a entry 2, 2 mol% precatalyst: 95% ee

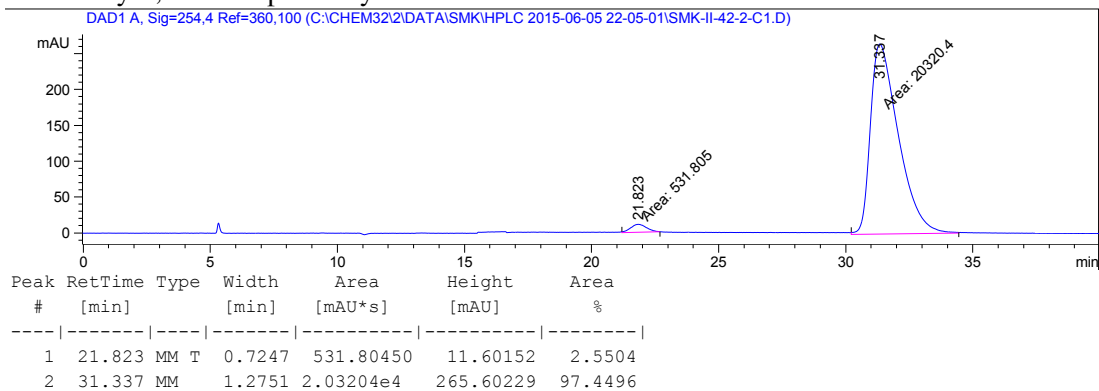

### L-6a entry 3, 2 mol% precatalyst: 89% ee

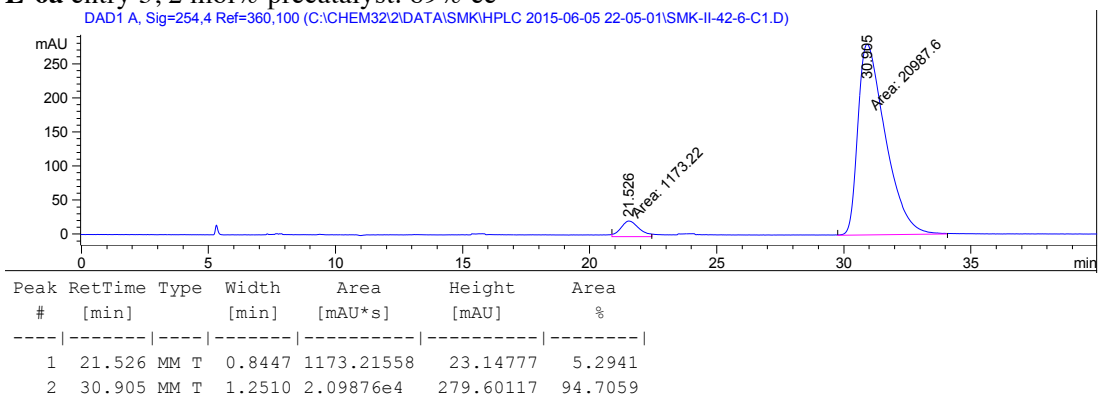

### L-6a entry 4, 2 mol% precatalyst: 92% ee

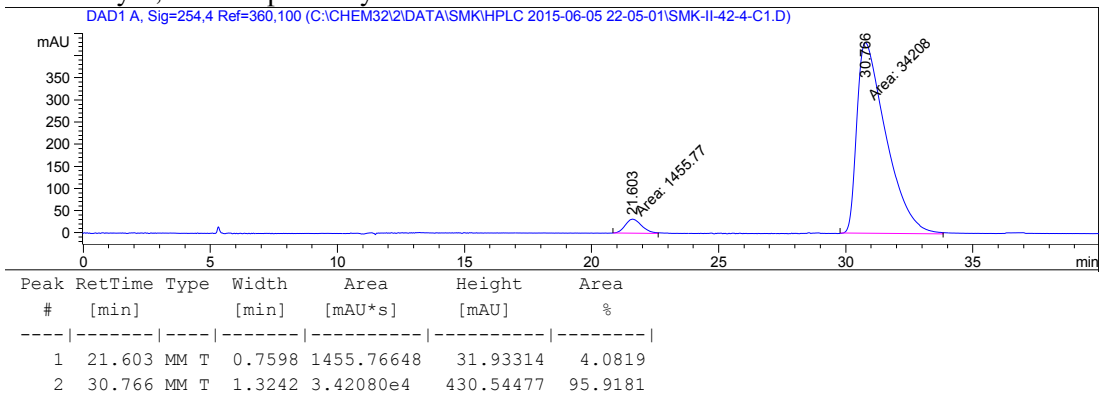

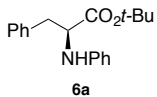

HPLC analysis conditions: OJ-H, 2% IPA–hexanes, 0.8 mL/min, 254 nm

**DL-6a**

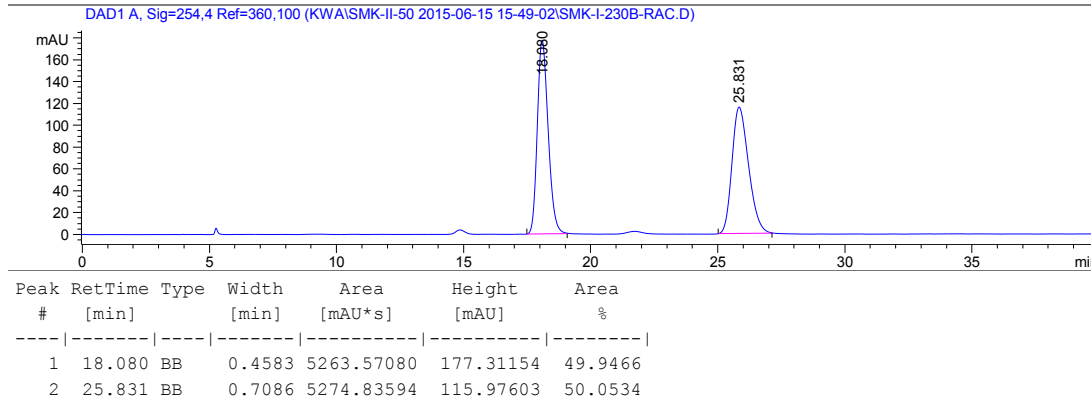

**L-6a entry 1, 5 mol% precatalyst: 94% ee**

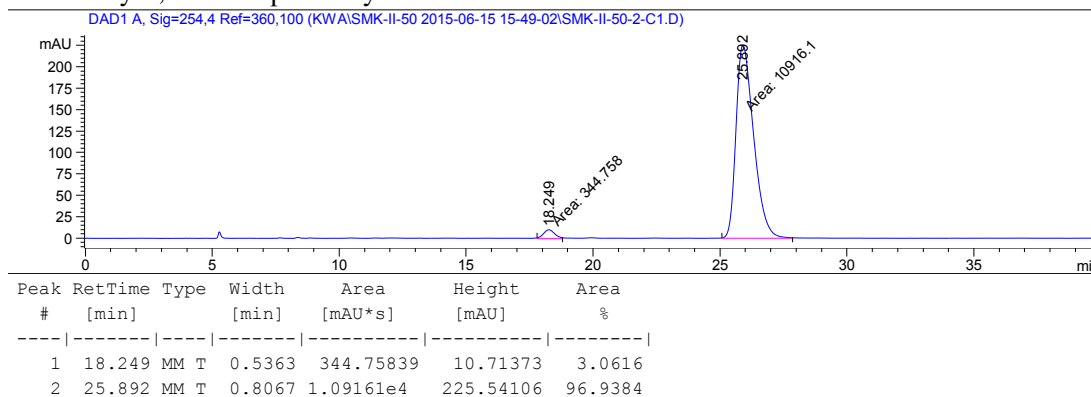

**L-6a entry 2, 5 mol% precatalyst: 92% ee**

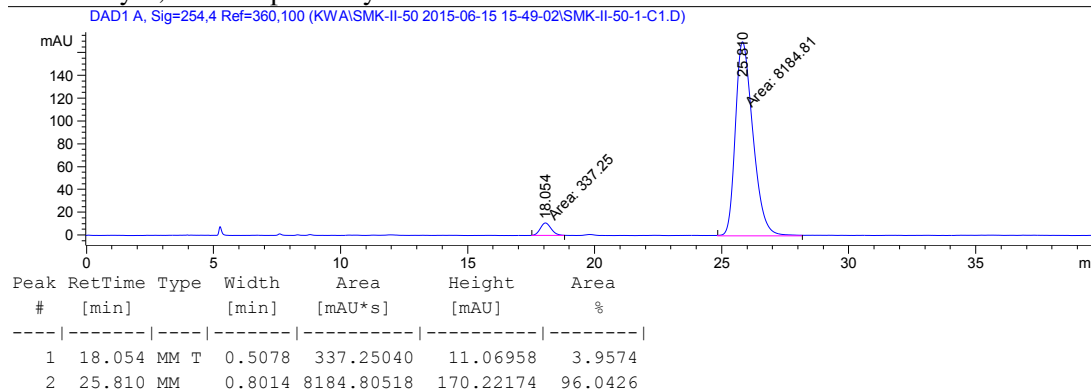

### L-6a entry 3, 5 mol% precatalyst: 91% ee

DAD1 A, Sig=254,4 Ref=360,100 (KWA\SMK-II-50 2015-06-15 15-49-02\SMK-II-50-3-C1.D)

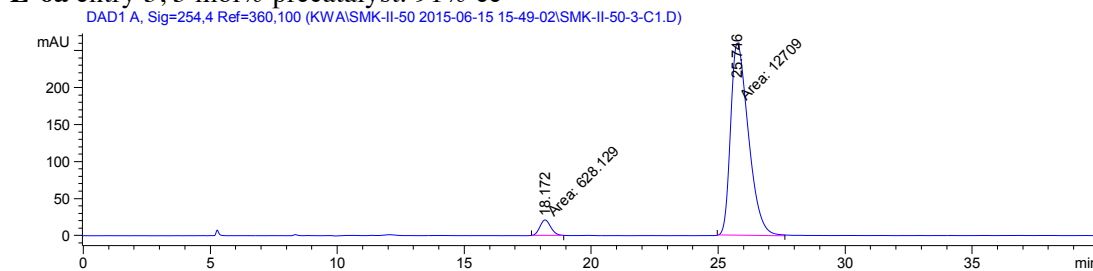

| Peak # | RetTime [min] | Type | Width [min] | Area [mAU*s] | Height [mAU] | Area %  |
|--------|---------------|------|-------------|--------------|--------------|---------|
| 1      | 18.172        | MM T | 0.4976      | 628.12885    | 21.03867     | 4.7096  |
| 2      | 25.746        | MM T | 0.8142      | 1.27090e4    | 260.16263    | 95.2904 |

### L-6a entry 4, 5 mol% precatalyst: 94% ee

DAD1 A, Sig=254,4 Ref=360,100 (KWA\SMK-II-50 2015-06-15 15-49-02\SMK-II-50-4-C1.D)

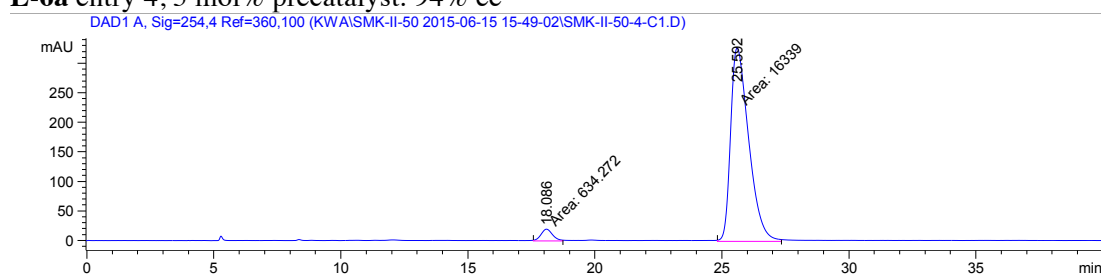

| Peak # | RetTime [min] | Type | Width [min] | Area [mAU*s] | Height [mAU] | Area %  |
|--------|---------------|------|-------------|--------------|--------------|---------|
| 1      | 18.086        | MM   | 0.5300      | 634.27228    | 19.94557     | 3.7369  |
| 2      | 25.592        | MM T | 0.8291      | 1.63390e4    | 328.45538    | 96.2631 |

A.

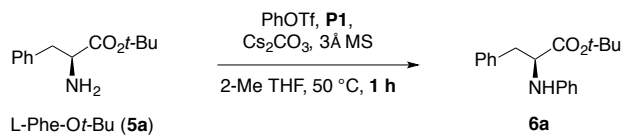

|    | ee before reaction | ee after reaction <sup>a</sup> |
|----|--------------------|--------------------------------|
| 5a | 99%                | 81%                            |
| 6a | –                  | 97%                            |

<sup>a</sup> Enantiomeric excess (ee) was determined directly from the crude reaction mixture by HPLC analysis using chiral stationary phases.

**Scheme 3. A.** Experiment determining the enantiomeric excess before and after the reaction.

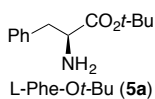

HPLC analysis conditions: AD-H, 1% IPA–hexanes, 0.8 mL/min, 210 nm

**DL-Phe-*O*-*t*-Bu (5a)**

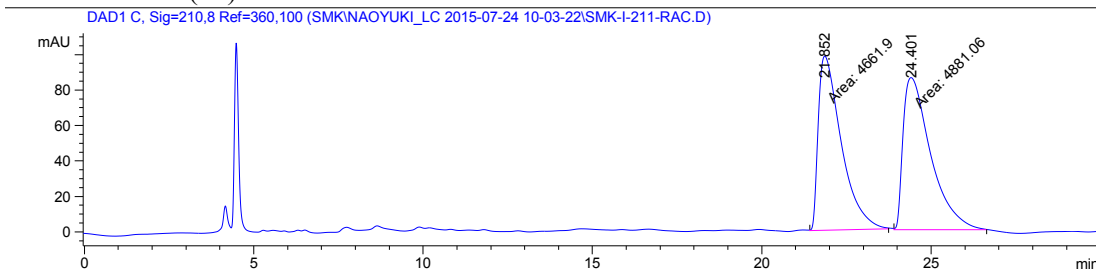

| Peak # | RetTime [min] | Type | Width [min] | Area [mAU*s] | Height [mAU] | Area %  |
|--------|---------------|------|-------------|--------------|--------------|---------|
| 1      | 21.852        | MM T | 0.7892      | 4661.89600   | 98.45503     | 48.8517 |
| 2      | 24.401        | MM T | 0.9467      | 4881.06299   | 85.93376     | 51.1483 |

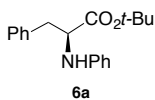

HPLC analysis conditions: AD-H, 1% IPA–hexanes, 0.8 mL/min, 254 nm

**DL-6a**

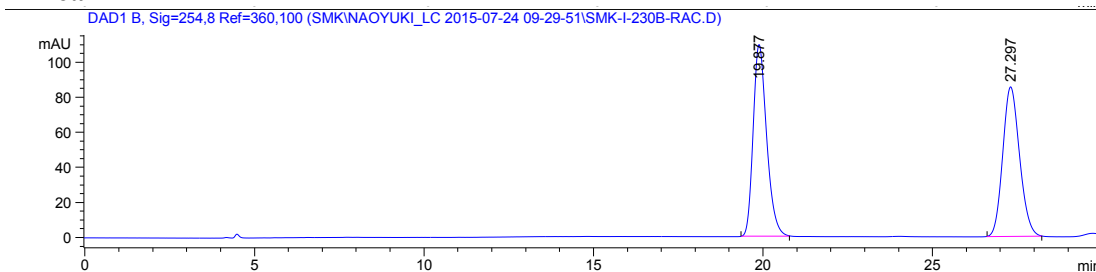

| Peak # | RetTime [min] | Type | Width [min] | Area [mAU*s] | Height [mAU] | Area %  |
|--------|---------------|------|-------------|--------------|--------------|---------|
| 1      | 19.877        | BB   | 0.4244      | 3024.33228   | 109.42875    | 50.6032 |
| 2      | 27.297        | BB   | 0.5313      | 2952.23071   | 85.39536     | 49.3968 |

co-injection of DL-6a + DL-Phe-O-*t*-Bu (5a)

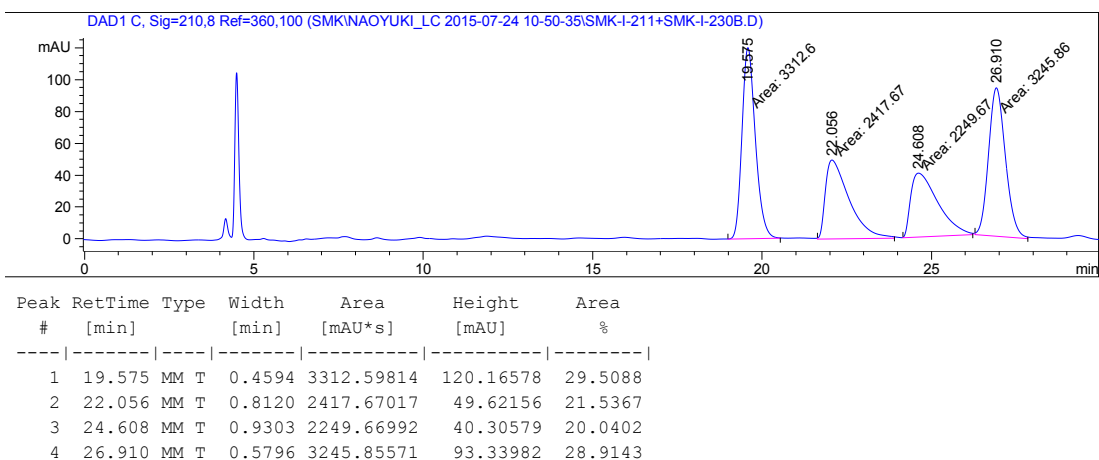

HPLC analysis of crude reaction mixture: L-Phe-O-*t*-Bu (5a), 81% ee; L-6a, 97% ee

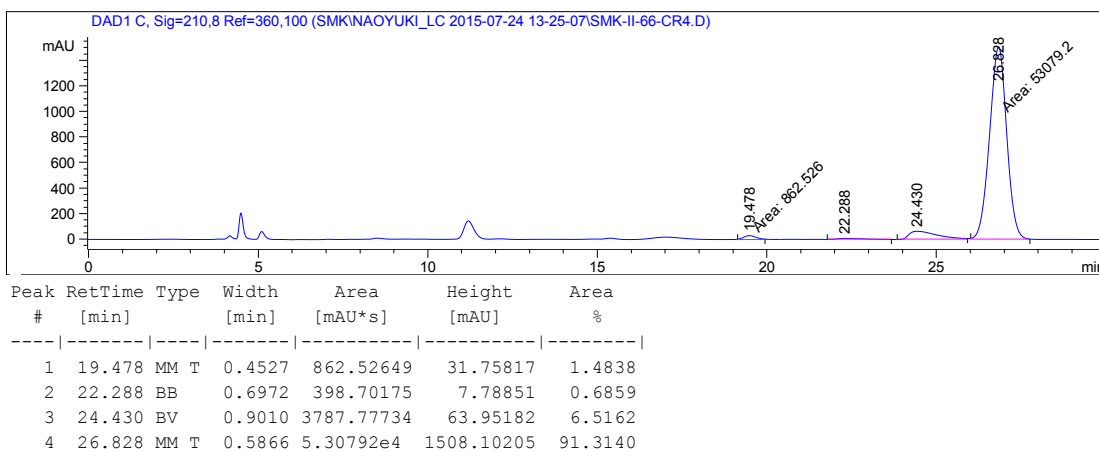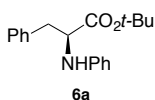

L-6a after purification: 97% ee

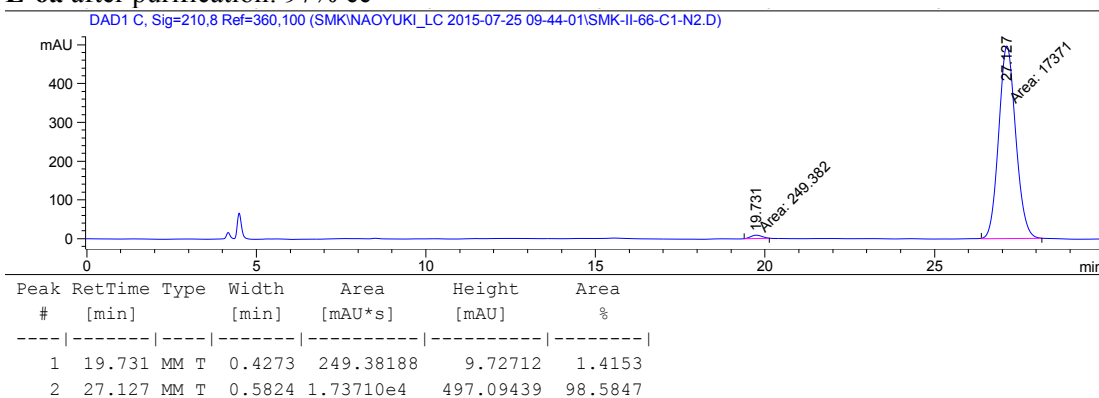



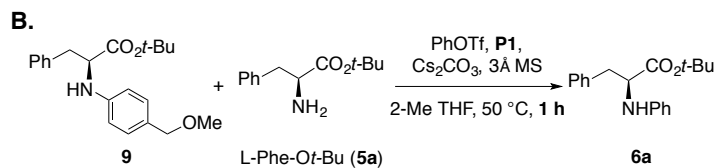

|           | ee before reaction | ee after reaction <sup>a</sup> |
|-----------|--------------------|--------------------------------|
| <b>9</b>  | 93%                | 93%                            |
| <b>5a</b> | 99%                | 81%                            |
| <b>6a</b> | —                  | 93%                            |

<sup>a</sup> Enantiomeric excess (ee) was determined after purification by silica gel chromatography.

**Scheme 3. B.** Experiment to test for product racemization with exogenous and different product added.

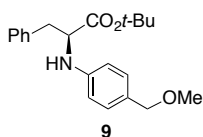

HPLC analysis (OD-H, 10% IPA–hexanes, 0.8 mL/min, 254 nm) indicated 93% ee: tR (minor) = 7.8 min, tR (major) = 10.6 min.

### DL-9

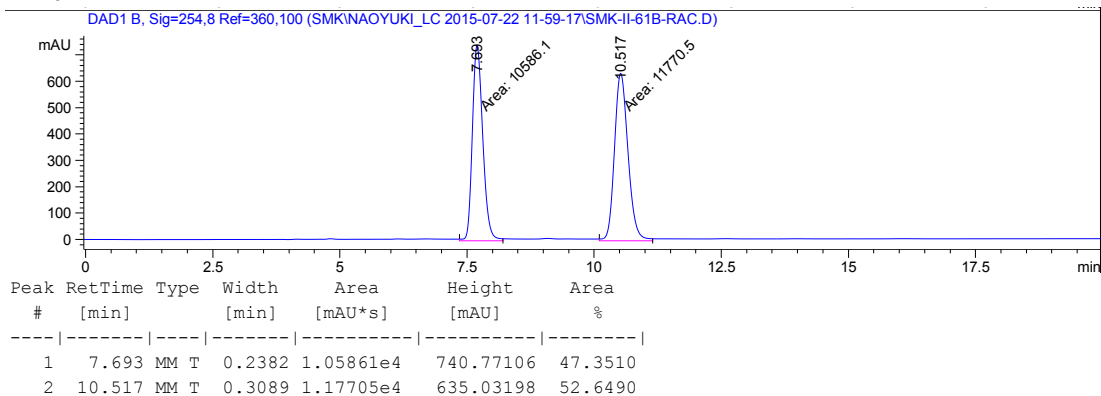

### L-9 starting material: 93% ee

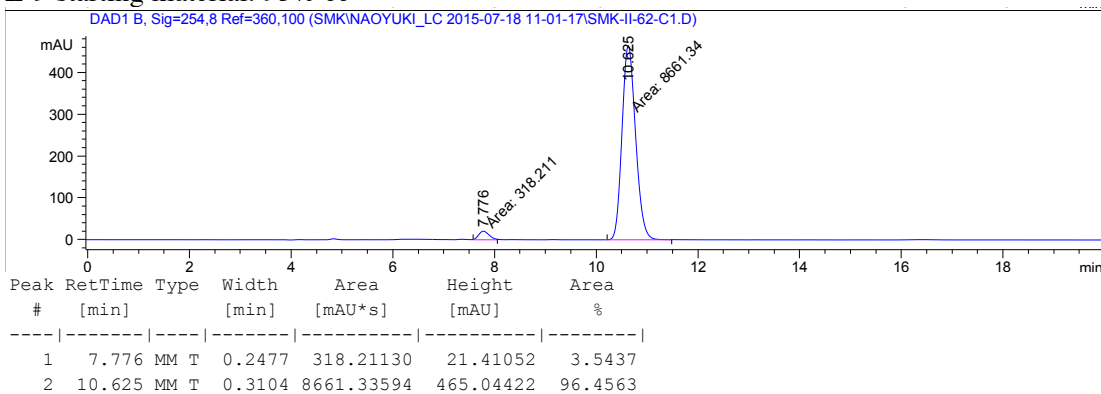

### L-9 after purification: 93% ee

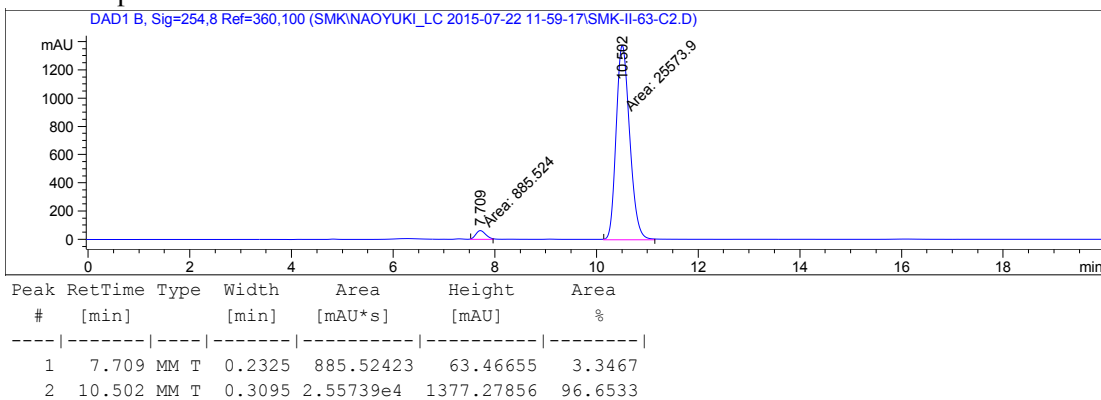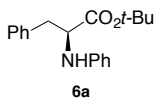

HPLC analysis conditions: AD-H, 1% IPA–hexanes, 0.8 mL/min, 254 nm, tR (minor) = 19.8 min, tR (major) = 26.6 min.

### DL-6a

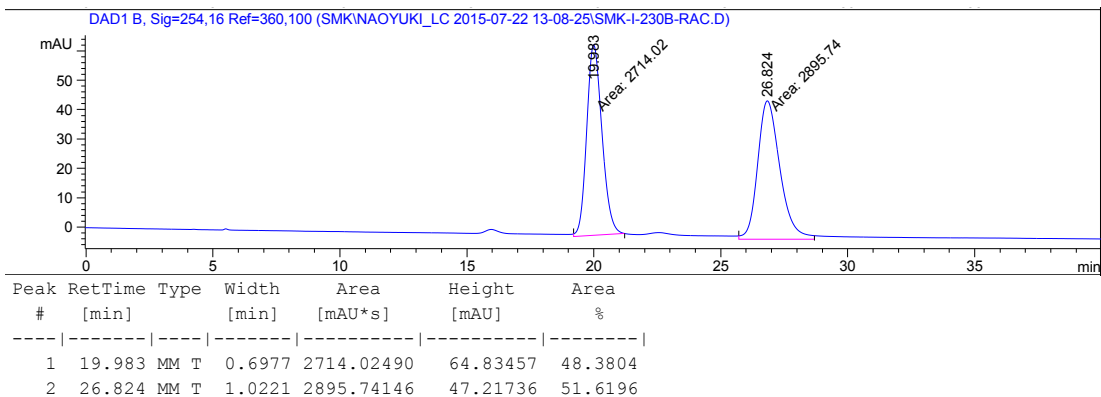

### L-6a reaction product after purification: 93% ee

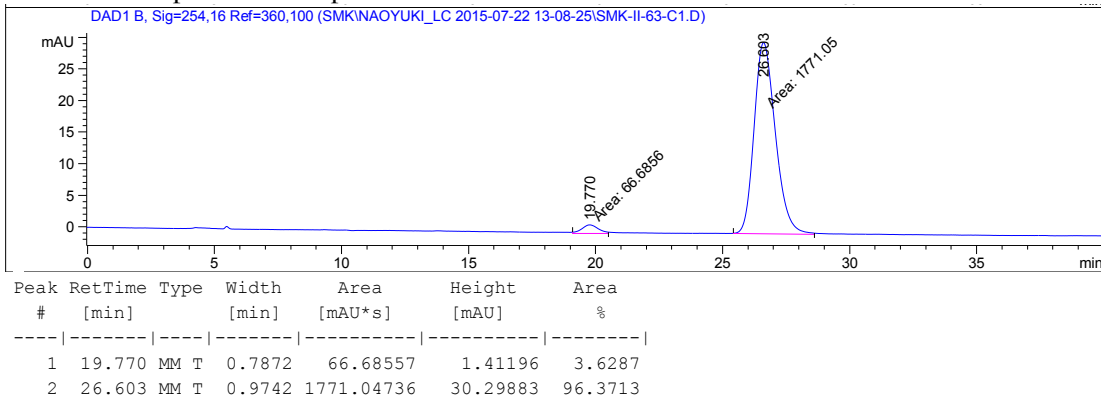

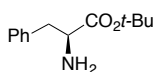

L-Phe-Ot-Bu (**5a**)

HPLC analysis conditions: AD-H, 1% IPA–hexanes, 0.8 mL/min, 254 nm, tR (minor) = 21.8 min, tR (major) = 23.8 min

DL-Phe-Ot-Bu (**5a**)

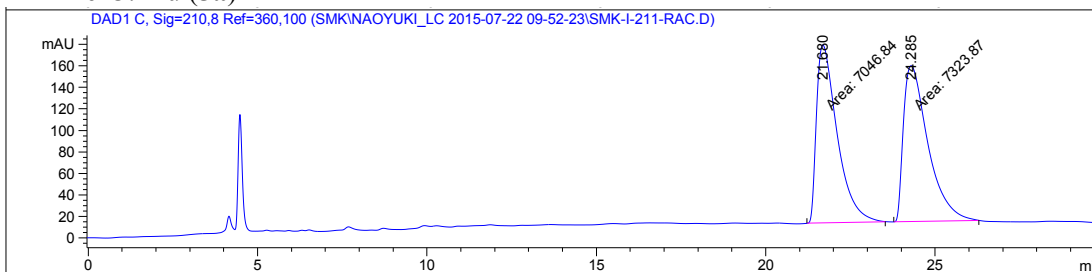

| Peak # | RetTime [min] | Type | Width [min] | Area [mAU*s] | Height [mAU] | Area %  |
|--------|---------------|------|-------------|--------------|--------------|---------|
| 1      | 21.680        | MM T | 0.7096      | 7046.84131   | 165.50804    | 49.0361 |
| 2      | 24.285        | MM T | 0.8412      | 7323.87207   | 145.11440    | 50.9639 |

L-Phe-Ot-Bu (**5a**) starting material: 99% ee

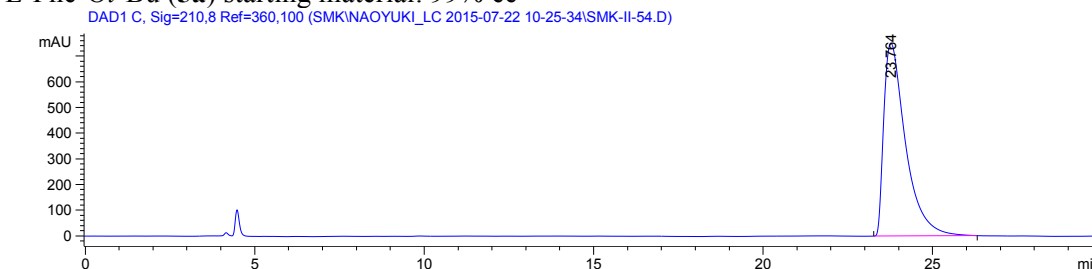

| Peak # | RetTime [min] | Type | Width [min] | Area [mAU*s] | Height [mAU] | Area %   |
|--------|---------------|------|-------------|--------------|--------------|----------|
| 1      | 23.764        | BB   | 0.6747      | 3.35271e4    | 751.23444    | 100.0000 |

L-Phe-Ot-Bu (**5a**) after purification: 81% ee

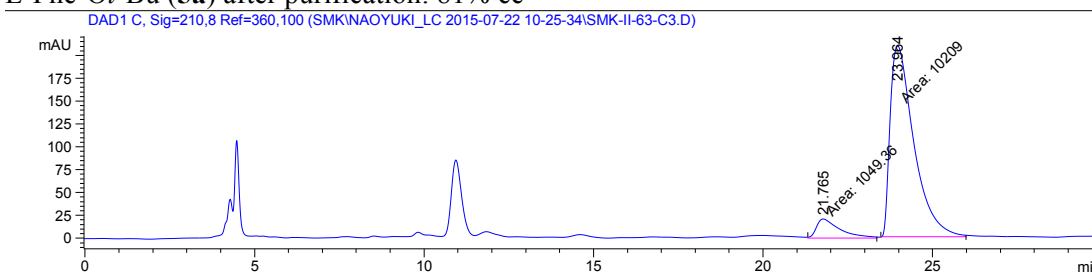

| Peak # | RetTime [min] | Type | Width [min] | Area [mAU*s] | Height [mAU] | Area %  |
|--------|---------------|------|-------------|--------------|--------------|---------|
| 1      | 21.765        | MM T | 0.8216      | 1049.36023   | 21.28705     | 9.3207  |
| 2      | 23.964        | MM T | 0.8131      | 1.02090e4    | 209.26880    | 90.6793 |

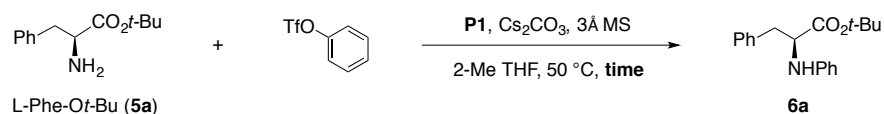

**Table S5.** Evaluation of yield and ee over reaction time.

| entry | time   | yield | ee  |
|-------|--------|-------|-----|
| 1     | 30 min | 67%   | 98% |
| 2     | 1 h    | 73%   | 97% |
| 3     | 1.5 h  | 90%   | 95% |
| 4     | 2 h    | 92%   | 95% |
| 5     | 4 h    | 96%   | 93% |
| 6     | 16 h   | 99%   | 88% |
| 7     | 10 d   | 91%   | 10% |

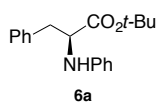

HPLC analysis conditions: OJ-H, 2% IPA–hexanes, 0.8 mL/min, 254 nm

**DL-6a**

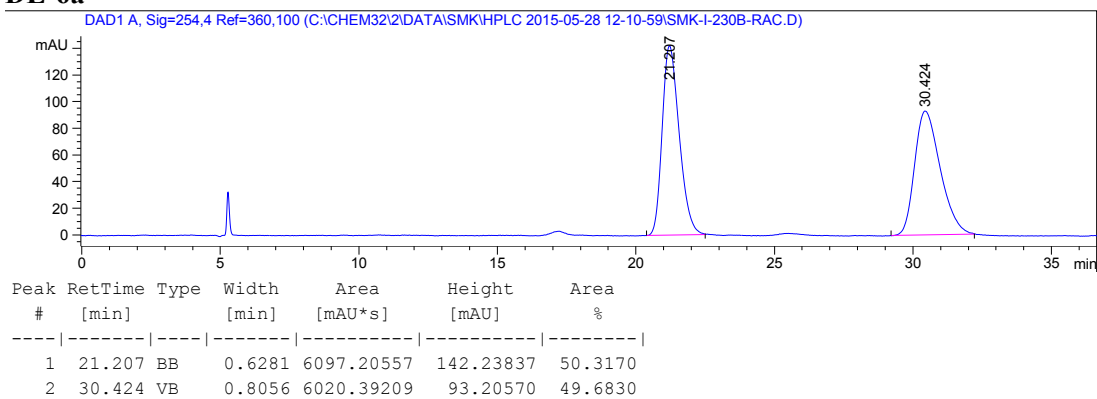

**L-6a entry 1: 98% ee**

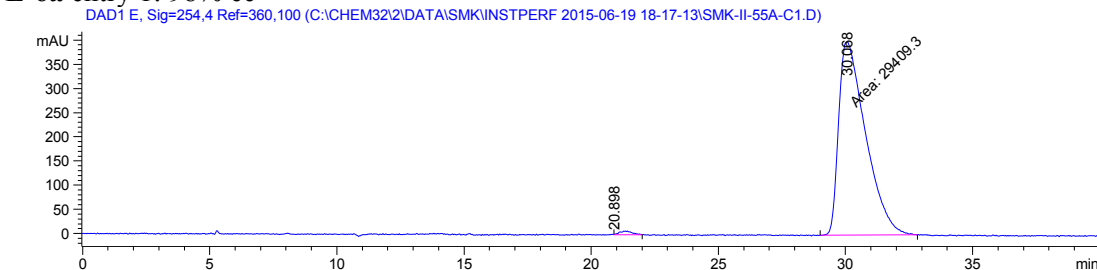

| Peak # | RetTime [min] | Type | Width [min] | Area [mAU*s] | Height [mAU] | Area %  |
|--------|---------------|------|-------------|--------------|--------------|---------|
| 1      | 20.898        | MM R | 0.5826      | 277.33759    | 7.35449e-1   | 0.9342  |
| 2      | 30.068        | MM T | 1.2234      | 2.94093e4    | 400.64212    | 99.0658 |

### L-6a entry 2: 97% ee

DAD1 E, Sig=254,4 Ref=360,100 (C:\CHEM32\2\DATA\SMK\INSTPERF 2015-06-19 18-17-13\SMK-II-55B-C1.D)

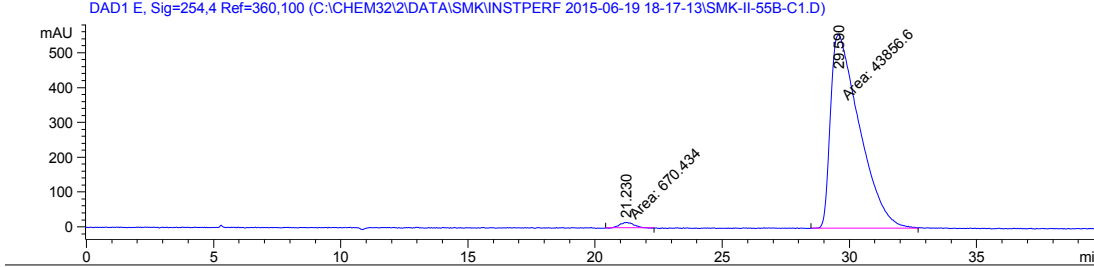

| Peak # | RetTime [min] | Type | Width [min] | Area [mAU*s] | Height [mAU] | Area %  |
|--------|---------------|------|-------------|--------------|--------------|---------|
| 1      | 21.230        | MM T | 0.6844      | 670.43445    | 16.32698     | 1.5057  |
| 2      | 29.590        | MM T | 1.3119      | 4.38566e4    | 557.17871    | 98.4943 |

### L-6a entry 3: 95% ee

DAD1 E, Sig=254,4 Ref=360,100 (C:\CHEM32\2\DATA\SMK\INSTPERF 2015-06-19 18-17-13\SMK-II-55C-C1.D)

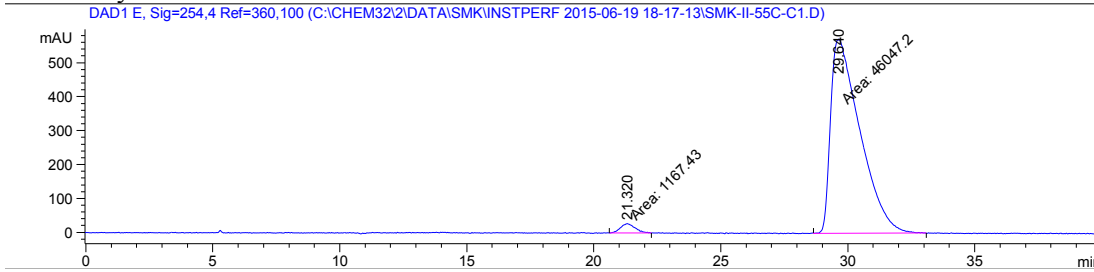

| Peak # | RetTime [min] | Type | Width [min] | Area [mAU*s] | Height [mAU] | Area %  |
|--------|---------------|------|-------------|--------------|--------------|---------|
| 1      | 21.320        | MM T | 0.6894      | 1167.42615   | 28.22312     | 2.4726  |
| 2      | 29.640        | MM T | 1.3393      | 4.60472e4    | 573.04565    | 97.5274 |

### L-6a entry 4: 95% ee

DAD1 B, Sig=254,16 Ref=360,100 (SMK\NAOYUKI\_LC 2015-07-14 16-41-46\SMK-II-57A-C1.D)

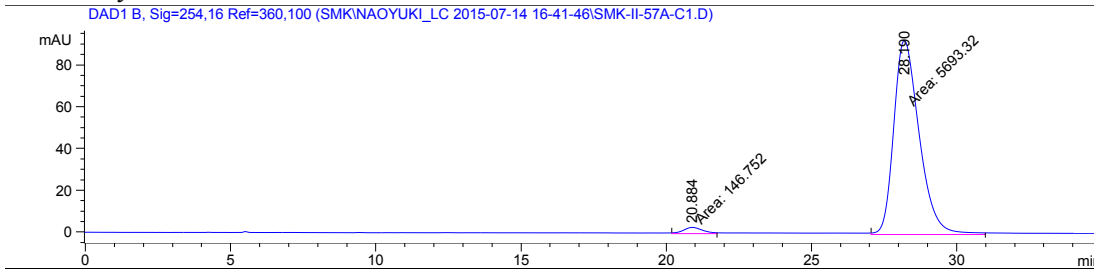

| Peak # | RetTime [min] | Type | Width [min] | Area [mAU*s] | Height [mAU] | Area %  |
|--------|---------------|------|-------------|--------------|--------------|---------|
| 1      | 20.884        | MM T | 0.8044      | 146.75229    | 3.04073      | 2.5129  |
| 2      | 28.190        | MM T | 1.0193      | 5693.31689   | 93.09573     | 97.4871 |

### L-6a entry 5: 93% ee

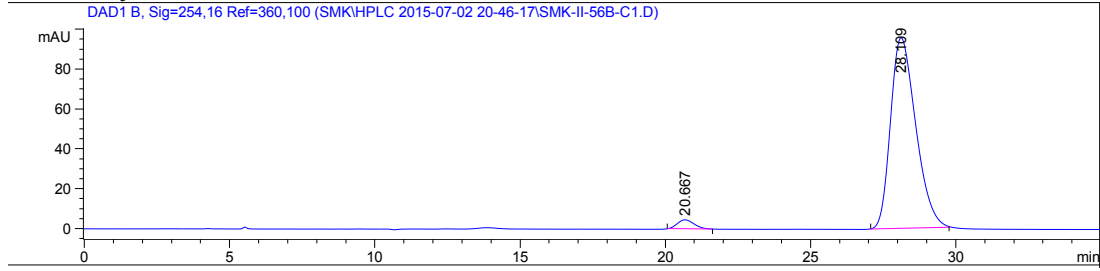

| Peak # | RetTime [min] | Type | Width [min] | Area [mAU*s] | Height [mAU] | Area %  |
|--------|---------------|------|-------------|--------------|--------------|---------|
| 1      | 20.667        | BB   | 0.5464      | 185.99770    | 4.59382      | 3.1189  |
| 2      | 28.109        | BB   | 0.9291      | 5777.48828   | 95.60141     | 96.8811 |

### L-6a entry 6: 88% ee

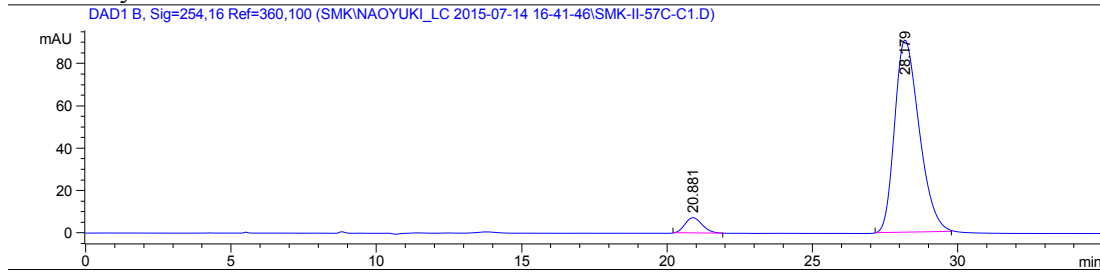

| Peak # | RetTime [min] | Type | Width [min] | Area [mAU*s] | Height [mAU] | Area %  |
|--------|---------------|------|-------------|--------------|--------------|---------|
| 1      | 20.881        | BB   | 0.5996      | 301.59750    | 7.24530      | 5.3442  |
| 2      | 28.179        | BB   | 0.9102      | 5341.89160   | 90.81699     | 94.6558 |

### L-6a entry 7: 10% ee

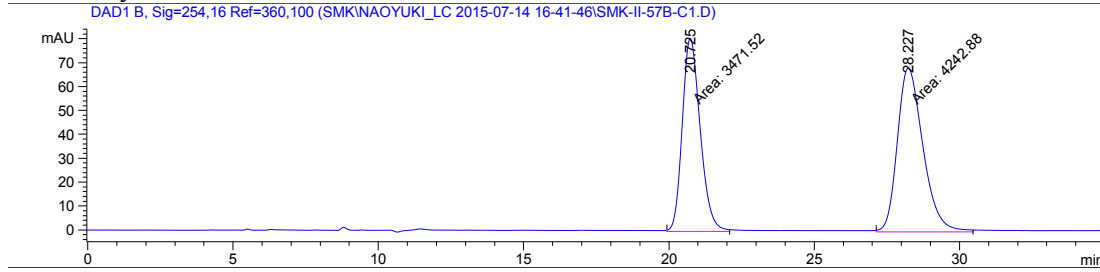

| Peak # | RetTime [min] | Type | Width [min] | Area [mAU*s] | Height [mAU] | Area %  |
|--------|---------------|------|-------------|--------------|--------------|---------|
| 1      | 20.725        | MM T | 0.7158      | 3471.51953   | 80.82986     | 45.0005 |
| 2      | 28.227        | MM T | 1.0278      | 4242.88184   | 68.79994     | 54.9995 |

#### IV. Bibliography

1. Bruno, N. C.; Niljianskul, N.; Buchwald, S. L., *J. Org. Chem.* **2014**, *79*, 4161.
2. Bruno, N. C.; Buchwald, S. L., *Org. Lett.* **2013**, *15*, 2876.
3. Abato, P.; Yuen, C. M.; Cubanski, J. Y.; Seto, C. T., *J. Org. Chem.* **2002**, *67*, 1184.
4. Hughes, M.; Birchall, L. S.; Zuberi, K.; Aitken, L. A.; Debnath, S.; Javid, N.; Ulijn, R. V., *Soft Matter* **2012**, *8*, 11565.
5. Zhu, Y.; Wu, G.; Zhu, X.; Ma, Y.; Zhao, X.; Li, Y.; Yuan, Y.; Yang, J.; Yu, S.; Shao, F.; Lei, M., *J. Med. Chem.* **2010**, *53*, 8619.
6. Milner, P. J.; Kinzel, T.; Zhang, Y.; Buchwald, S. L., *J. Am. Chem. Soc.* **2014**, *136*, 15757.
7. Petrassi, H. M.; Klabunde, T.; Sacchettini, J.; Kelly, J. W., *J. Am. Chem. Soc.* **2000**, *122*, 2178.
8. Mori, A.; Mizusaki, T.; Ikawa, T.; Maegawa, T.; Monguchi, Y.; Sajiki, H., *Chem. – Eur. J.* **2007**, *13*, 1432.
9. Kale, A. P.; Pawar, G. G.; Kapur, M., *Org. Lett.* **2012**, *14*, 1808.
10. Brady, R. M.; Vom, A.; Roy, M. J.; Toovey, N.; Smith, B. J.; Moss, R. M.; Hatzis, E.; Huang, D. C. S.; Parisot, J. P.; Yang, H.; Street, I. P.; Colman, P. M.; Czabotar, P. E.; Baell, J. B.; Lessene, G., *J. Med. Chem.* **2014**, *57*, 1323.
11. Proutiere, F.; Schoenebeck, F., *Angew. Chem., Int. Ed. Engl.* **2011**, *50*, 8192.
12. Goossen, L. J.; Rodríguez, N.; Linder, C., *J. Am. Chem. Soc.* **2008**, *130*, 15248.
13. Lee, H. G.; Milner, P. J.; Buchwald, S. L., *Org. Lett.* **2013**, *15*, 5602.
14. Furuya, T.; Strom, A. E.; Ritter, T., *J. Am. Chem. Soc.* **2009**, *131*, 1662.
15. Guptill, D. M.; Davies, H. M. L., *J. Am. Chem. Soc.* **2014**, *136*, 17718.
16. For clarity synthetic intermediates not described in the manuscript are numbered in the Supporting Information beginning with **S1**.
